# Supplementary material for: Next-Generation Sequencing of Genomic DNA Fragments Bound to a Transcription Factor in Vitro Reveals Its Regulatory Potential
Source: Genes (Basel). 2014 Dec 19;5(4):1115–31. doi: 10.3390/genes5041115 (PMC4276929; doi:10.3390/genes5041115)
Supplement: Supplementary File 1 [file genes-05-01115-s001.xlsx]

## Sheet: Table S1
Primer_name	Sequence
CRY3rtF	ATCCAGAAGGAGAATACGTTG
CRY3rtR	ACAAGTTCGTGTAAAGAATAGTTTCTC
3G27690rtF	AACTTAGCGGAGGATCCAG
3G27690rtR	TCCGATCAAACTCTATTTTCC
P5CS1rtF	GGAGACAATGGAATTGTTTACAC
P5CS1rtR	CAAAACCACTACATAAGCGAG
5G52250rtF	GTCAGAGAATAACCAAGTGTTTG
5G52250rtR	CAGTTTGTATTAATCATGAGCAG
1G75100rtF	GGAAAGAGTGGAAACATTCG
1G75100rtR	GGTCCGAGAGTGTTGAAGTG
F3HrtF	TAACTCGAGCAGATTATCCATAG
F3HrtR	AGAACACAAAGATTCTAAGCGA
2G34430rtF	AGTTGAAGGTGAAGGAGCTC
2G34430rtR	ACATTTCCAAGATGCAACAAAC
4G28660rtF	GATGTTAAGCTGACTCGATCA
4G28660rtR	CTCATTGAAAATTCTCTCCAAC
1G07150rtF	GTAGGGAGATCAGAATTCGAAG
1G07150rtR	CTGATACAACAAATACATAGTGAGAAC
HY5rtF	GACTAGCTCTTTAGCTGCAAG
HY5rtR	GTGTTCTTCAGAATATGTCTAAGCA
ACT2rtF	CTCAGGTATCGCTGACCGTATGAG
ACT2rtR	CTTGGAGATCCACATCTGCTGGAATG

## Sheet: Table S2
Chromosome	Peak position 1	Peak position 2	Peak ID	Peak score	Neighboring gene	Peak position to neighboring gene	Distance from peak	ChIP-chip (Lee et al.a)	Frequency of gene
Chr1	52598	52599	hy5-1_peak_1	8.5587	AT1G01100	upstream	1400	listed	1		a. Lee et al. (2007) Plant Cell, 19, 731-749.
Chr1	52598	52599	hy5-1_peak_1	8.5587	AT1G01110	inside		listed	1
Chr1	58463	58464	hy5-1_peak_2	31.2561	AT1G01120	inside		listed	1
Chr1	79309	79310	hy5-1_peak_3	30.1471	AT1G01183	upstream	278		1
Chr1	84494	84495	hy5-1_peak_4	171.847	AT1G01190	inside			1
Chr1	99440	99441	hy5-1_peak_5	259.339	AT1G01230	downstream	201		1
Chr1	99440	99441	hy5-1_peak_5	259.339	AT1G01240	upstream	453	listed	1
Chr1	104884	104885	hy5-1_peak_6	378.809	AT1G01250	inside		listed	1
Chr1	113583	113584	hy5-1_peak_7	21.3841	AT1G01270	upstream	1623	listed	1
Chr1	113583	113584	hy5-1_peak_7	21.3841	AT1G01290	upstream	702	listed	1
Chr1	113583	113584	hy5-1_peak_7	21.3841	AT1G01280	inside		listed	1
Chr1	118145	118146	hy5-1_peak_8	8.75037	AT1G01305	upstream	1251	listed	1
Chr1	118145	118146	hy5-1_peak_8	8.75037	AT1G01300	inside		listed	1
Chr1	128992	128993	hy5-1_peak_9	144.095	AT1G01320	inside		listed	1
Chr1	140449	140450	hy5-1_peak_10	27.7498	AT1G01360	upstream	1521	listed	1
Chr1	149379	149380	hy5-1_peak_11	36.1556	AT1G01390	inside		listed	1
Chr1	190361	190362	hy5-1_peak_12	8.17248	AT1G01510	downstream	306	listed	1
Chr1	190361	190362	hy5-1_peak_12	8.17248	AT1G01520	upstream	234	listed	1
Chr1	220259	220260	hy5-1_peak_13	404.308	AT1G01600	inside		listed	1
Chr1	257143	257144	hy5-1_peak_14	9.6041		no hit			0
Chr1	268193	268194	hy5-1_peak_15	343.127	AT1G01710	downstream	423		1
Chr1	268193	268194	hy5-1_peak_15	343.127	AT1G01720	upstream	136	listed	1
Chr1	274156	274157	hy5-1_peak_16	20.31	AT1G01750	upstream	1209		1
Chr1	274156	274157	hy5-1_peak_16	20.31	AT1G01740	inside			1
Chr1	302535	302536	hy5-1_peak_17	19.6025	AT1G01830	upstream	221		1
Chr1	302535	302536	hy5-1_peak_17	19.6025	AT1G01840	upstream	1001	listed	1
Chr1	420132	420133	hy5-1_peak_19	82.5091	AT1G02205	inside		listed	1
Chr1	436996	436997	hy5-1_peak_20	291.817	AT1G02230	upstream	221	listed	1
Chr1	473618	473619	hy5-1_peak_21	31.446	AT1G02360	upstream	459	listed	1
Chr1	473618	473619	hy5-1_peak_21	31.446	AT1G02370	upstream	881	listed	1
Chr1	482848	482849	hy5-1_peak_22	10.859	AT1G02390	inside		listed	1
Chr1	498926	498927	hy5-1_peak_23	12.5173	AT1G02440	upstream	1448		1
Chr1	498926	498927	hy5-1_peak_23	12.5173	AT1G02450	upstream	411		1
Chr1	528621	528622	hy5-1_peak_24	16.2898	AT1G02530	upstream	1173		1
Chr1	528621	528622	hy5-1_peak_24	16.2898	AT1G02520	inside			1
Chr1	534422	534423	hy5-1_peak_25	6.82488	AT1G02540	downstream	404		1
Chr1	534422	534423	hy5-1_peak_25	6.82488	AT1G02530	inside			2
Chr1	536951	536952	hy5-1_peak_26	16.6074	AT1G02540	upstream	1253		2
Chr1	536951	536952	hy5-1_peak_26	16.6074	AT1G02560	upstream	908		1
Chr1	536951	536952	hy5-1_peak_26	16.6074	AT1G02550	inside			1
Chr1	565963	565964	hy5-1_peak_27	20.9059	AT1G02640	inside		listed	1
Chr1	567403	567404	hy5-1_peak_28	96.9303	AT1G02650	upstream	1300	listed	1
Chr1	567403	567404	hy5-1_peak_28	96.9303	AT1G02640	inside		listed	2
Chr1	575625	575626	hy5-1_peak_29	260.013	AT1G02660	upstream	645		1
Chr1	575625	575626	hy5-1_peak_29	260.013	AT1G02670	upstream	420		1
Chr1	588245	588246	hy5-1_peak_30	157.219	AT1G02700	upstream	83		1
Chr1	618714	618715	hy5-1_peak_31	247.646	AT1G02813	upstream	1963	listed	1
Chr1	618714	618715	hy5-1_peak_31	247.646	AT1G02810	inside		listed	1
Chr1	644642	644643	hy5-1_peak_32	153.699	AT1G02890	downstream	449	listed	1
Chr1	644642	644643	hy5-1_peak_32	153.699	AT1G02880	inside		listed	1
Chr1	707415	707416	hy5-1_peak_33	103.55	AT1G03040	upstream	785	listed	1
Chr1	707415	707416	hy5-1_peak_33	103.55	AT1G03050	upstream	310	listed	1
Chr1	728343	728344	hy5-1_peak_34	8.12125	AT1G03060	upstream	1453		1
Chr1	728343	728344	hy5-1_peak_34	8.12125	AT1G03070	upstream	1557	listed	1
Chr1	739584	739585	hy5-1_peak_35	122.883	AT1G03080	upstream	1529		1
Chr1	739584	739585	hy5-1_peak_35	122.883	AT1G03090	upstream	94	listed	1
Chr1	752362	752363	hy5-1_peak_36	278.548	AT1G03110	downstream	400		1
Chr1	752362	752363	hy5-1_peak_36	278.548	AT1G03120	inside			1
Chr1	761355	761356	hy5-1_peak_37	51.3712	AT1G03160	inside		listed	1
Chr1	788260	788261	hy5-1_peak_38	169.06	AT1G03230	upstream	1830	listed	1
Chr1	788260	788261	hy5-1_peak_38	169.06	AT1G03220	inside		listed	1
Chr1	791224	791225	hy5-1_peak_39	88.009	AT1G03230	inside			2
Chr1	799058	799059	hy5-1_peak_40	12.1643	AT1G03260	upstream	596		1
Chr1	799058	799059	hy5-1_peak_40	12.1643	AT1G03270	upstream	132		1
Chr1	870965	870966	hy5-1_peak_41	88.119	AT1G03490	upstream	908		1
Chr1	870965	870966	hy5-1_peak_41	88.119	AT1G03475	inside			1
Chr1	898816	898817	hy5-1_peak_42	7.98591	AT1G03590	upstream	1299		1
Chr1	898816	898817	hy5-1_peak_42	7.98591	AT1G03600	upstream	59	listed	1
Chr1	922098	922099	hy5-1_peak_43	5.56259	AT1G03700	downstream	198		1
Chr1	922098	922099	hy5-1_peak_43	5.56259	AT1G03710	upstream	1327		1
Chr1	958129	958130	hy5-1_peak_44	6.96356	AT1G03800	upstream	132	listed	1
Chr1	958129	958130	hy5-1_peak_44	6.96356	AT1G03810	upstream	629	listed	1
Chr1	993318	993319	hy5-1_peak_45	332.374	AT1G03900	downstream	201		1
Chr1	993318	993319	hy5-1_peak_45	332.374	AT1G03905	upstream	81	listed	1
Chr1	1043552	1043553	hy5-1_peak_46	418.013	AT1G04040	inside			1
Chr1	1071983	1071984	hy5-1_peak_47	77.1212	AT1G04120	upstream	937	listed	1
Chr1	1071983	1071984	hy5-1_peak_47	77.1212	AT1G04130	upstream	1443	listed	1
Chr1	1121145	1121146	hy5-1_peak_48	151.112	AT1G04220	inside		listed	1
Chr1	1143207	1143208	hy5-1_peak_49	10.4448	AT1G04280	downstream	228	listed	1
Chr1	1143207	1143208	hy5-1_peak_49	10.4448	AT1G04260	upstream	1843		1
Chr1	1143207	1143208	hy5-1_peak_49	10.4448	AT1G04270	upstream	155		1
Chr1	1159177	1159178	hy5-1_peak_50	9.67639	AT1G04320	downstream	85		1
Chr1	1159177	1159178	hy5-1_peak_50	9.67639	AT1G04310	upstream	1467		1
Chr1	1170746	1170747	hy5-1_peak_51	79.5624	AT1G04360	upstream	1869	listed	1
Chr1	1191405	1191406	hy5-1_peak_52	30.3751	AT1G04420	upstream	202	listed	1
Chr1	1191405	1191406	hy5-1_peak_52	30.3751	AT1G04410	inside			1
Chr1	1224655	1224656	hy5-1_peak_53	416.506	AT1G04500	upstream	290		1
Chr1	1224655	1224656	hy5-1_peak_53	416.506	AT1G04510	upstream	1919		1
Chr1	1224655	1224656	hy5-1_peak_53	416.506	AT1G04501	inside			1
Chr1	1286386	1286387	hy5-1_peak_54	224.118	AT1G04620	inside			1
Chr1	1416214	1416215	hy5-1_peak_55	8.76812	AT1G04985	downstream	128	listed	1
Chr1	1416214	1416215	hy5-1_peak_55	8.76812	AT1G04980	upstream	71	listed	1
Chr1	1445011	1445012	hy5-1_peak_56	8.08396		no hit			0
Chr1	1469210	1469211	hy5-1_peak_57	387.144	AT1G05100	upstream	399	listed	1
Chr1	1547375	1547376	hy5-1_peak_58	11.19	AT1G05300	inside		listed	1
Chr1	1569949	1569950	hy5-1_peak_59	366.367	AT1G05370	inside			1
Chr1	1590756	1590757	hy5-1_peak_60	57.6529	AT1G05420	downstream	4		1
Chr1	1659526	1659527	hy5-1_peak_61	331.677	AT1G05570	upstream	90	listed	1
Chr1	1729584	1729585	hy5-1_peak_62	6.71941	AT1G05785	upstream	664	listed	1
Chr1	1769193	1769194	hy5-1_peak_63	70.5245	AT1G05850	upstream	499		1
Chr1	1769193	1769194	hy5-1_peak_63	70.5245	AT1G05860	inside			1
Chr1	1905743	1905744	hy5-1_peak_64	9.86407	AT1G06225	upstream	231		1
Chr1	1905743	1905744	hy5-1_peak_64	9.86407	AT1G06230	upstream	1219		1
Chr1	1940530	1940531	hy5-1_peak_65	25.6592	AT1G06360	upstream	72	listed	1
Chr1	1986490	1986491	hy5-1_peak_66	18.4284	AT1G06490	inside		listed	1
Chr1	1999059	1999060	hy5-1_peak_67	9.30126		no hit			0
Chr1	2013642	2013643	hy5-1_peak_68	9.29857	AT1G06580	downstream	360	listed	1
Chr1	2013642	2013643	hy5-1_peak_68	9.29857	AT1G06570	upstream	98	listed	1
Chr1	2047751	2047752	hy5-1_peak_69	181.308	AT1G06670	downstream	140		1
Chr1	2047751	2047752	hy5-1_peak_69	181.308	AT1G06680	upstream	73		1
Chr1	2143311	2143312	hy5-1_peak_70	6.57254	AT1G06980	inside			1
Chr1	2160871	2160872	hy5-1_peak_71	8.9404	AT1G07040	downstream	66	listed	1
Chr1	2160871	2160872	hy5-1_peak_71	8.9404	AT1G07030	upstream	63		1
Chr1	2163151	2163152	hy5-1_peak_72	9.02826	AT1G07040	inside		listed	2
Chr1	2169917	2169918	hy5-1_peak_73	31.1668	AT1G07070	downstream	67	listed	1
Chr1	2169917	2169918	hy5-1_peak_73	31.1668	AT1G07060	upstream	1521		1
Chr1	2169917	2169918	hy5-1_peak_73	31.1668	AT1G07080	upstream	64	listed	1
Chr1	2194654	2194655	hy5-1_peak_75	124.477	AT1G07140	upstream	862		1
Chr1	2194654	2194655	hy5-1_peak_75	124.477	AT1G07150	inside		listed	1
Chr1	2195446	2195447	hy5-1_peak_76	111.739	AT1G07140	upstream	1654		2
Chr1	2195446	2195447	hy5-1_peak_76	111.739	AT1G07150	inside		listed	2
Chr1	2214311	2214312	hy5-1_peak_77	161.262	AT1G07200	upstream	1766		1
Chr1	2214311	2214312	hy5-1_peak_77	161.262	AT1G07210	upstream	911	listed	1
Chr1	2225127	2225128	hy5-1_peak_78	13.6488	AT1G07250	upstream	772	listed	1
Chr1	2225127	2225128	hy5-1_peak_78	13.6488	AT1G07240	inside		listed	1
Chr1	2270040	2270041	hy5-1_peak_79	134.726	AT1G07380	upstream	1735		1
Chr1	2270040	2270041	hy5-1_peak_79	134.726	AT1G07390	inside			1
Chr1	2283068	2283069	hy5-1_peak_80	175.635	AT1G07430	upstream	241	listed	1
Chr1	2303579	2303580	hy5-1_peak_81	9.15504	AT1G07490	upstream	1559	listed	1
Chr1	2303579	2303580	hy5-1_peak_81	9.15504	AT1G07510	upstream	1798	listed	1
Chr1	2374921	2374922	hy5-1_peak_82	339.484	AT1G07670	upstream	377		1
Chr1	2374921	2374922	hy5-1_peak_82	339.484	AT1G07680	upstream	1090	listed	1
Chr1	2391264	2391265	hy5-1_peak_83	27.4356	AT1G07720	inside		listed	1
Chr1	2432809	2432810	hy5-1_peak_84	31.5967	AT1G07870	upstream	753	listed	1
Chr1	2442460	2442461	hy5-1_peak_85	11.3426	AT1G07900	upstream	161	listed	1
Chr1	2498708	2498709	hy5-1_peak_86	14.4577	AT1G08050	downstream	127	listed	1
Chr1	2498708	2498709	hy5-1_peak_86	14.4577	AT1G08040	inside		listed	1
Chr1	2522807	2522808	hy5-1_peak_87	18.8349	AT1G08090	upstream	1268		1
Chr1	2530362	2530363	hy5-1_peak_88	263.347	AT1G08100	upstream	1243	listed	1
Chr1	2580900	2580901	hy5-1_peak_89	15.621	AT1G08220	downstream	121	listed	1
Chr1	2580900	2580901	hy5-1_peak_89	15.621	AT1G08210	upstream	232	listed	1
Chr1	2665155	2665156	hy5-1_peak_90	9.10722	AT1G08440	inside			1
Chr1	2788141	2788142	hy5-1_peak_91	11.2135	AT1G08730	inside			1
Chr1	2827006	2827007	hy5-1_peak_92	36.0661	AT1G08820	upstream	1732		1
Chr1	2827006	2827007	hy5-1_peak_92	36.0661	AT1G08830	upstream	54	listed	1
Chr1	2853063	2853064	hy5-1_peak_93	37.7647	AT1G08900	inside			1
Chr1	2881556	2881557	hy5-1_peak_94	54.5441	AT1G08970	upstream	967	listed	1
Chr1	2881556	2881557	hy5-1_peak_94	54.5441	AT1G08960	inside			1
Chr1	2889136	2889137	hy5-1_peak_95	215.497	AT1G09000	upstream	1900		1
Chr1	2889136	2889137	hy5-1_peak_95	215.497	AT1G08990	inside			1
Chr1	2950694	2950695	hy5-1_peak_96	103.379	AT1G09155	inside			1
Chr1	2976818	2976819	hy5-1_peak_97	361.337	AT1G09210	upstream	69	listed	1
Chr1	3019544	3019545	hy5-1_peak_98	23.7267	AT1G09350	upstream	274	listed	1
Chr1	3020442	3020443	hy5-1_peak_99	33.3982	AT1G09360	upstream	1359	listed	1
Chr1	3020442	3020443	hy5-1_peak_99	33.3982	AT1G09350	inside		listed	2
Chr1	3072112	3072113	hy5-1_peak_100	16.6343	AT1G09520	upstream	63	listed	1
Chr1	3151491	3151492	hy5-1_peak_101	11.5434	AT1G09730	inside			1
Chr1	3158752	3158753	hy5-1_peak_102	258.66	AT1G09760	downstream	372		1
Chr1	3158752	3158753	hy5-1_peak_102	258.66	AT1G09750	inside			1
Chr1	3296266	3296267	hy5-1_peak_103	128.577	AT1G10090	upstream	69	listed	1
Chr1	3325610	3325611	hy5-1_peak_104	30.1599	AT1G10150	upstream	213	listed	1
Chr1	3400969	3400970	hy5-1_peak_105	65.4578	AT1G10380	inside			1
Chr1	3442687	3442688	hy5-1_peak_106	13.5058	AT1G10470	inside		listed	1
Chr1	3479382	3479383	hy5-1_peak_107	11.3753	AT1G10540	upstream	1456	listed	1
Chr1	3479382	3479383	hy5-1_peak_107	11.3753	AT1G10550	inside		listed	1
Chr1	3590625	3590626	hy5-1_peak_108	7.22729	AT1G10760	inside		listed	1
Chr1	3680161	3680162	hy5-1_peak_109	16.1697	AT1G11030	upstream	1314		1
Chr1	3680161	3680162	hy5-1_peak_109	16.1697	AT1G11050	upstream	1726	listed	1
Chr1	3680161	3680162	hy5-1_peak_109	16.1697	AT1G11040	inside			1
Chr1	3702854	3702855	hy5-1_peak_110	9.01204	AT1G11090	inside			1
Chr1	3716112	3716113	hy5-1_peak_111	15.4711	AT1G11120	inside			1
Chr1	3756698	3756699	hy5-1_peak_112	131.046	AT1G11210	inside		listed	1
Chr1	3764866	3764867	hy5-1_peak_113	341.549	AT1G11230	upstream	384	listed	1
Chr1	3867078	3867079	hy5-1_peak_114	46.7128	AT1G11480	upstream	110	listed	1
Chr1	3903156	3903157	hy5-1_peak_115	83.9585	AT1G11600	inside		listed	1
Chr1	3931288	3931289	hy5-1_peak_116	26.7645	AT1G11670	inside		listed	1
Chr1	3944682	3944683	hy5-1_peak_117	18.155	AT1G11700	upstream	1054	listed	1
Chr1	3951040	3951041	hy5-1_peak_118	212.911	AT1G11720	upstream	512	listed	1
Chr1	3951040	3951041	hy5-1_peak_118	212.911	AT1G11710	inside		listed	1
Chr1	4010622	4010623	hy5-1_peak_119	103.559	AT1G11880	upstream	190	listed	1
Chr1	4010622	4010623	hy5-1_peak_119	103.559	AT1G11890	upstream	156	listed	1
Chr1	4024141	4024142	hy5-1_peak_120	126.529	AT1G11920	inside		listed	1
Chr1	4066895	4066896	hy5-1_peak_121	10.9974	AT1G12030	upstream	555	listed	1
Chr1	4137475	4137476	hy5-1_peak_122	217.988	AT1G12200	upstream	57	listed	1
Chr1	4167147	4167148	hy5-1_peak_123	31.9073	AT1G12260	upstream	1296		1
Chr1	4211712	4211713	hy5-1_peak_124	49.4581		no hit			0
Chr1	4230624	4230625	hy5-1_peak_125	15.9332	AT1G12423	downstream	402	listed	1
Chr1	4230624	4230625	hy5-1_peak_125	15.9332	AT1G12420	upstream	1487	listed	1
Chr1	4246182	4246183	hy5-1_peak_126	206.605	AT1G12450	downstream	190	listed	1
Chr1	4246182	4246183	hy5-1_peak_126	206.605	AT1G12460	upstream	1066	listed	1
Chr1	4246182	4246183	hy5-1_peak_126	206.605	AT1G12451	inside		listed	1
Chr1	4264610	4264611	hy5-1_peak_127	129.793	AT1G12500	inside			1
Chr1	4290756	4290757	hy5-1_peak_128	220.519	AT1G12600	upstream	1879	listed	1
Chr1	4290756	4290757	hy5-1_peak_128	220.519	AT1G12610	inside		listed	1
Chr1	4358775	4358776	hy5-1_peak_130	28.2916	AT1G12790	downstream	375		1
Chr1	4358775	4358776	hy5-1_peak_130	28.2916	AT1G12780	upstream	448		1
Chr1	4433395	4433396	hy5-1_peak_131	9.20725	AT1G12990	upstream	244	listed	1
Chr1	4458534	4458535	hy5-1_peak_132	12.3737	AT1G13080	upstream	631		1
Chr1	4475690	4475691	hy5-1_peak_133	43.0153	AT1G13130	inside			1
Chr1	4529478	4529479	hy5-1_peak_134	158.48	AT1G13250	inside		listed	1
Chr1	4580143	4580144	hy5-1_peak_135	37.3758		no hit			0
Chr1	4585446	4585447	hy5-1_peak_136	338.947		no hit			0
Chr1	4680200	4680201	hy5-1_peak_137	217.988	AT1G13650	downstream	231	listed	1
Chr1	4680200	4680201	hy5-1_peak_137	217.988	AT1G13640	upstream	389	listed	1
Chr1	4713567	4713568	hy5-1_peak_138	10.5252	AT1G13740	upstream	106	listed	1
Chr1	4735556	4735557	hy5-1_peak_139	22.2753	AT1G13810	downstream	168		1
Chr1	4735556	4735557	hy5-1_peak_139	22.2753	AT1G13800	upstream	1850		1
Chr1	4735556	4735557	hy5-1_peak_139	22.2753	AT1G13820	inside			1
Chr1	4762439	4762440	hy5-1_peak_140	33.4762	AT1G13940	downstream	263	listed	1
Chr1	4762439	4762440	hy5-1_peak_140	33.4762	AT1G13930	inside		listed	1
Chr1	4839798	4839799	hy5-1_peak_141	60.0394	AT1G14140	upstream	166		1
Chr1	4839798	4839799	hy5-1_peak_141	60.0394	AT1G14150	upstream	54	listed	1
Chr1	4854717	4854718	hy5-1_peak_142	221.151	AT1G14190	downstream	411		1
Chr1	4854717	4854718	hy5-1_peak_142	221.151	AT1G14205	upstream	815		1
Chr1	4854717	4854718	hy5-1_peak_142	221.151	AT1G14200	inside			1
Chr1	4935962	4935963	hy5-1_peak_143	89.4082	AT1G14430	inside		listed	1
Chr1	4973925	4973926	hy5-1_peak_144	61.4437	AT1G14540	downstream	141	listed	1
Chr1	4973925	4973926	hy5-1_peak_144	61.4437	AT1G14530	upstream	200	listed	1
Chr1	5070616	5070617	hy5-1_peak_145	124.974	AT1G14720	upstream	1972		1
Chr1	5147721	5147722	hy5-1_peak_146	29.2146	AT1G14920	upstream	1504	listed	1
Chr1	5157759	5157760	hy5-1_peak_147	12.4315	AT1G14950	inside			1
Chr1	5169785	5169786	hy5-1_peak_148	19.579	AT1G15002	downstream	154	listed	1
Chr1	5169785	5169786	hy5-1_peak_148	19.579	AT1G14990	upstream	1522		1
Chr1	5169785	5169786	hy5-1_peak_148	19.579	AT1G15010	upstream	1421	listed	1
Chr1	5169785	5169786	hy5-1_peak_148	19.579	AT1G15000	inside		listed	1
Chr1	5228037	5228038	hy5-1_peak_149	32.882	AT1G15200	downstream	262	listed	1
Chr1	5228037	5228038	hy5-1_peak_149	32.882	AT1G15190	inside		listed	1
Chr1	5265197	5265198	hy5-1_peak_150	7.88064	AT1G15290	upstream	256		1
Chr1	5274229	5274230	hy5-1_peak_151	25.1824	AT1G15320	upstream	156		1
Chr1	5274229	5274230	hy5-1_peak_151	25.1824	AT1G15330	upstream	116	listed	1
Chr1	5290141	5290142	hy5-1_peak_152	199.145	AT1G15380	upstream	603	listed	1
Chr1	5366951	5366952	hy5-1_peak_153	11.9907	AT1G15580	upstream	455		1
Chr1	5366951	5366952	hy5-1_peak_153	11.9907	AT1G15590	upstream	345	listed	1
Chr1	5366951	5366952	hy5-1_peak_153	11.9907	AT1G15600	upstream	1971	listed	1
Chr1	5390975	5390976	hy5-1_peak_154	341.662	AT1G15670	inside		listed	1
Chr1	5478861	5478862	hy5-1_peak_155	15.8338	AT1G15950	inside		listed	1
Chr1	5506922	5506923	hy5-1_peak_156	119.949	AT1G16040	downstream	312		1
Chr1	5506922	5506923	hy5-1_peak_156	119.949	AT1G16060	upstream	1584	listed	1
Chr1	5574028	5574029	hy5-1_peak_157	39.9895	AT1G16290	upstream	491		1
Chr1	5574028	5574029	hy5-1_peak_157	39.9895	AT1G16300	upstream	281	listed	1
Chr1	5610817	5610818	hy5-1_peak_158	6.64598	AT1G16410	inside			1
Chr1	5630522	5630523	hy5-1_peak_159	11.5266	AT1G16489	downstream	35		1
Chr1	5630522	5630523	hy5-1_peak_159	11.5266	AT1G16480	upstream	1867		1
Chr1	5630522	5630523	hy5-1_peak_159	11.5266	AT1G16490	inside			1
Chr1	5644906	5644907	hy5-1_peak_160	64.9947	AT1G16510	inside			1
Chr1	5727502	5727503	hy5-1_peak_161	19.7291	AT1G16730	upstream	191	listed	1
Chr1	5727502	5727503	hy5-1_peak_161	19.7291	AT1G16740	upstream	187	listed	1
Chr1	5744304	5744305	hy5-1_peak_162	90.6083	AT1G16780	upstream	91		1
Chr1	5744304	5744305	hy5-1_peak_162	90.6083	AT1G16790	upstream	248	listed	1
Chr1	5765826	5765827	hy5-1_peak_163	11.9907	AT1G16840	upstream	1754		1
Chr1	5765826	5765827	hy5-1_peak_163	11.9907	AT1G16850	upstream	176	listed	1
Chr1	5765826	5765827	hy5-1_peak_163	11.9907	AT1G16858	upstream	1473	listed	1
Chr1	5765826	5765827	hy5-1_peak_163	11.9907	AT1G16860	upstream	1473	listed	1
Chr1	5773363	5773364	hy5-1_peak_164	10.5461	AT1G16870	upstream	113		1
Chr1	5773363	5773364	hy5-1_peak_164	10.5461	AT1G16880	upstream	228		1
Chr1	5849429	5849430	hy5-1_peak_165	7.6536	AT1G17110	inside			1
Chr1	5977071	5977072	hy5-1_peak_166	7.88064	AT1G17420	upstream	339	listed	1
Chr1	5998623	5998624	hy5-1_peak_167	74.5863	AT1G17455	downstream	149	listed	1
Chr1	5998623	5998624	hy5-1_peak_167	74.5863	AT1G17450	upstream	1839		1
Chr1	5998623	5998624	hy5-1_peak_167	74.5863	AT1G17460	upstream	190	listed	1
Chr1	6017355	6017356	hy5-1_peak_168	33.8899	AT1G17500	upstream	1401		1
Chr1	6038743	6038744	hy5-1_peak_169	24.3183	AT1G17560	upstream	52	listed	1
Chr1	6038743	6038744	hy5-1_peak_169	24.3183	AT1G17570	upstream	13	listed	1
Chr1	6038743	6038744	hy5-1_peak_169	24.3183	AT1G17580	upstream	559	listed	1
Chr1	6058741	6058742	hy5-1_peak_170	27.2603	AT1G17610	downstream	385		1
Chr1	6058741	6058742	hy5-1_peak_170	27.2603	AT1G17615	upstream	699	listed	1
Chr1	6062750	6062751	hy5-1_peak_171	55.2446	AT1G17630	upstream	1774	listed	1
Chr1	6062750	6062751	hy5-1_peak_171	55.2446	AT1G17620	inside		listed	1
Chr1	6149175	6149176	hy5-1_peak_172	8.91829	AT1G17850	upstream	236	listed	1
Chr1	6149175	6149176	hy5-1_peak_172	8.91829	AT1G17860	upstream	125	listed	1
Chr1	6165879	6165880	hy5-1_peak_173	139.241	AT1G17930	downstream	340		1
Chr1	6165879	6165880	hy5-1_peak_173	139.241	AT1G17920	upstream	498		1
Chr1	6195622	6195623	hy5-1_peak_174	9.2045	AT1G17990	upstream	1530		1
Chr1	6195622	6195623	hy5-1_peak_174	9.2045	AT1G18000	inside			1
Chr1	6200403	6200404	hy5-1_peak_175	9.2045	AT1G18020	upstream	1845		1
Chr1	6200403	6200404	hy5-1_peak_175	9.2045	AT1G18010	inside			1
Chr1	6231673	6231674	hy5-1_peak_176	82.9796	AT1G18100	upstream	1486		1
Chr1	6240318	6240319	hy5-1_peak_177	20.453	AT1G18140	inside			1
Chr1	6268393	6268394	hy5-1_peak_178	8.29686	AT1G18200	upstream	1457	listed	1
Chr1	6268393	6268394	hy5-1_peak_178	8.29686	AT1G18210	inside		listed	1
Chr1	6279105	6279106	hy5-1_peak_179	287.419	AT1G18250	upstream	956		1
Chr1	6279105	6279106	hy5-1_peak_179	287.419	AT1G18260	inside			1
Chr1	6294642	6294643	hy5-1_peak_180	234.448	AT1G18270	upstream	772		1
Chr1	6294642	6294643	hy5-1_peak_180	234.448	AT1G18280	inside			1
Chr1	6302500	6302501	hy5-1_peak_181	51.3108	AT1G18320	upstream	1859	listed	1
Chr1	6302500	6302501	hy5-1_peak_181	51.3108	AT1G18310	inside		listed	1
Chr1	6304112	6304113	hy5-1_peak_182	12.7177	AT1G18310	upstream	157		2
Chr1	6304112	6304113	hy5-1_peak_182	12.7177	AT1G18320	upstream	247		2
Chr1	6352377	6352378	hy5-1_peak_183	139.969	AT1G18450	downstream	403		1
Chr1	6352377	6352378	hy5-1_peak_183	139.969	AT1G18460	upstream	92		1
Chr1	6405473	6405474	hy5-1_peak_184	8.73134	AT1G18610	upstream	171		1
Chr1	6449627	6449628	hy5-1_peak_185	78.8068	AT1G18710	upstream	966	listed	1
Chr1	6474741	6474742	hy5-1_peak_187	360.49	AT1G18770	upstream	694	listed	1
Chr1	6474741	6474742	hy5-1_peak_187	360.49	AT1G18773	upstream	60	listed	1
Chr1	6562863	6562864	hy5-1_peak_188	202.421	AT1G19000	upstream	78	listed	1
Chr1	6672316	6672317	hy5-1_peak_189	195.454	AT1G19300	inside		listed	1
Chr1	6683182	6683183	hy5-1_peak_190	35.3255	AT1G19340	upstream	1568	listed	1
Chr1	6683182	6683183	hy5-1_peak_190	35.3255	AT1G19330	inside		listed	1
Chr1	6688864	6688865	hy5-1_peak_191	41.4722	AT1G19350	inside			1
Chr1	6754249	6754250	hy5-1_peak_192	21.7758	AT1G19490	upstream	251	listed	1
Chr1	6805483	6805484	hy5-1_peak_193	210.132	AT1G19670	upstream	440		1
Chr1	6805483	6805484	hy5-1_peak_193	210.132	AT1G19680	inside		listed	1
Chr1	6873113	6873114	hy5-1_peak_194	29.2791	AT1G19840	inside		listed	1
Chr1	6883192	6883193	hy5-1_peak_195	36.4364		no hit			0
Chr1	6899726	6899727	hy5-1_peak_196	53.1023	AT1G19870	upstream	1002	listed	1
Chr1	6904833	6904834	hy5-1_peak_197	24.7991	AT1G19880	upstream	765		1
Chr1	6904833	6904834	hy5-1_peak_197	24.7991	AT1G19890	upstream	200	listed	1
Chr1	6939980	6939981	hy5-1_peak_198	8.29805	AT1G20015	upstream	1304	listed	1
Chr1	6939980	6939981	hy5-1_peak_198	8.29805	AT1G20010	inside		listed	1
Chr1	6946479	6946480	hy5-1_peak_199	76.7367	AT1G20030	inside		listed	1
Chr1	6958544	6958545	hy5-1_peak_200	15.6927	AT1G20065	downstream	470		1
Chr1	6958544	6958545	hy5-1_peak_200	15.6927	AT1G20070	inside		listed	1
Chr1	7009492	7009493	hy5-1_peak_201	9.95785	AT1G20220	upstream	1842		1
Chr1	7009492	7009493	hy5-1_peak_201	9.95785	AT1G20225	upstream	160	listed	1
Chr1	7009492	7009493	hy5-1_peak_201	9.95785	AT1G20230	upstream	77	listed	1
Chr1	7043537	7043538	hy5-1_peak_202	275.502	AT1G20340	upstream	175	listed	1
Chr1	7043537	7043538	hy5-1_peak_202	275.502	AT1G20350	upstream	175	listed	1
Chr1	7090212	7090213	hy5-1_peak_203	76.5489	AT1G20450	upstream	607		1
Chr1	7090212	7090213	hy5-1_peak_203	76.5489	AT1G20460	upstream	1148	listed	1
Chr1	7102729	7102730	hy5-1_peak_204	227.051	AT1G20500	inside			1
Chr1	7179373	7179374	hy5-1_peak_205	152.115	AT1G20696	upstream	78	listed	1
Chr1	7258222	7258223	hy5-1_peak_206	16.7506	AT1G20860	inside			1
Chr1	7267498	7267499	hy5-1_peak_207	343.824	AT1G20890	upstream	176	listed	1
Chr1	7294897	7294898	hy5-1_peak_208	30.699	AT1G20940	downstream	376		1
Chr1	7294897	7294898	hy5-1_peak_208	30.699	AT1G20930	upstream	152		1
Chr1	7402523	7402524	hy5-1_peak_210	137.264	AT1G21130	upstream	1919		1
Chr1	7402523	7402524	hy5-1_peak_210	137.264	AT1G21140	upstream	1859		1
Chr1	7454130	7454131	hy5-1_peak_211	237.645	AT1G21310	inside		listed	1
Chr1	7470336	7470337	hy5-1_peak_212	26.7048	AT1G21326	upstream	616		1
Chr1	7524341	7524342	hy5-1_peak_213	33.8068	AT1G21475	inside			1
Chr1	7533302	7533303	hy5-1_peak_214	30.3751	AT1G21510	upstream	674		1
Chr1	7573615	7573616	hy5-1_peak_215	40.3898	AT1G21610	upstream	306		1
Chr1	7573615	7573616	hy5-1_peak_215	40.3898	AT1G21600	inside			1
Chr1	7579531	7579532	hy5-1_peak_216	137.747	AT1G21630	upstream	1552		1
Chr1	7579531	7579532	hy5-1_peak_216	137.747	AT1G21620	inside			1
Chr1	7611334	7611335	hy5-1_peak_217	175.62	AT1G21680	upstream	1670	listed	1
Chr1	7611334	7611335	hy5-1_peak_217	175.62	AT1G21670	inside		listed	1
Chr1	7612927	7612928	hy5-1_peak_218	217.939	AT1G21670	downstream	246	listed	2
Chr1	7612927	7612928	hy5-1_peak_218	217.939	AT1G21680	upstream	77	listed	2
Chr1	7613988	7613989	hy5-1_peak_219	139.855	AT1G21690	upstream	1625	listed	1
Chr1	7613988	7613989	hy5-1_peak_219	139.855	AT1G21680	inside		listed	3
Chr1	7645494	7645495	hy5-1_peak_220	11.0633	AT1G21740	downstream	417	listed	1
Chr1	7645494	7645495	hy5-1_peak_220	11.0633	AT1G21750	upstream	205	listed	1
Chr1	7661572	7661573	hy5-1_peak_221	319.253	AT1G21830	inside		listed	1
Chr1	7692469	7692470	hy5-1_peak_222	12.1345	AT1G21900	upstream	32	listed	1
Chr1	7732309	7732310	hy5-1_peak_223	26.8604	AT1G21975	inside			1
Chr1	7802362	7802363	hy5-1_peak_224	109.659	AT1G22110	inside			1
Chr1	7832745	7832746	hy5-1_peak_225	101.678		no hit			0
Chr1	7886929	7886930	hy5-1_peak_226	70.6244	AT1G22330	inside		listed	1
Chr1	7908366	7908367	hy5-1_peak_227	85.5416	AT1G22403	downstream	201	listed	1
Chr1	7908366	7908367	hy5-1_peak_227	85.5416	AT1G22400	upstream	1694	listed	1
Chr1	7945003	7945004	hy5-1_peak_228	53.4491		no hit			0
Chr1	7988325	7988326	hy5-1_peak_229	11.0751	AT1G22600	inside		listed	1
Chr1	7994674	7994675	hy5-1_peak_230	37.9201	AT1G22610	inside			1
Chr1	8050799	8050800	hy5-1_peak_231	78.1197	AT1G22740	downstream	92	listed	1
Chr1	8050799	8050800	hy5-1_peak_231	78.1197	AT1G22750	upstream	60	listed	1
Chr1	8060885	8060886	hy5-1_peak_232	359.59	AT1G22767	downstream	156		1
Chr1	8060885	8060886	hy5-1_peak_232	359.59	AT1G22770	upstream	958	listed	1
Chr1	8148901	8148902	hy5-1_peak_233	53.7647	AT1G23010	inside			1
Chr1	8153789	8153790	hy5-1_peak_234	33.3533	AT1G23020	upstream	260	listed	1
Chr1	8165077	8165078	hy5-1_peak_235	10.9465	AT1G23040	inside			1
Chr1	8175878	8175879	hy5-1_peak_236	93.3094	AT1G23070	upstream	60	listed	1
Chr1	8175878	8175879	hy5-1_peak_236	93.3094	AT1G23074	upstream	1953	listed	1
Chr1	8227092	8227093	hy5-1_peak_237	10.9161	AT1G23200	upstream	85		1
Chr1	8274427	8274428	hy5-1_peak_238	87.1379	AT1G23320	inside			1
Chr1	8309189	8309190	hy5-1_peak_239	187.605	AT1G23390	inside		listed	1
Chr1	8321526	8321527	hy5-1_peak_240	162.626	AT1G23440	upstream	153	listed	1
Chr1	8384928	8384929	hy5-1_peak_241	85.6733	AT1G23710	upstream	322	listed	1
Chr1	8424356	8424357	hy5-1_peak_242	10.2459	AT1G23830	upstream	269		1
Chr1	8424356	8424357	hy5-1_peak_242	10.2459	AT1G23840	inside			1
Chr1	8430139	8430140	hy5-1_peak_243	7.96743	AT1G23860	upstream	642	listed	1
Chr1	8488011	8488012	hy5-1_peak_244	51.8103		no hit			0
Chr1	8520126	8520127	hy5-1_peak_245	24.3665	AT1G24080	downstream	163		1
Chr1	8520126	8520127	hy5-1_peak_245	24.3665	AT1G24070	upstream	393		1
Chr1	8520126	8520127	hy5-1_peak_245	24.3665	AT1G24090	upstream	707		1
Chr1	8535333	8535334	hy5-1_peak_246	5.93898	AT1G24130	inside			1
Chr1	8635137	8635138	hy5-1_peak_247	21.6504	AT1G24330	downstream	83		1
Chr1	8635137	8635138	hy5-1_peak_247	21.6504	AT1G24340	upstream	71	listed	1
Chr1	8688889	8688890	hy5-1_peak_248	28.4993	AT1G24510	upstream	643		1
Chr1	8688889	8688890	hy5-1_peak_248	28.4993	AT1G24520	inside			1
Chr1	8693364	8693365	hy5-1_peak_249	149.732	AT1G24530	inside		listed	1
Chr1	8709754	8709755	hy5-1_peak_250	86.9276	AT1G24570	downstream	166		1
Chr1	8709754	8709755	hy5-1_peak_250	86.9276	AT1G24580	upstream	425		1
Chr1	8903455	8903456	hy5-1_peak_251	50.6326	AT1G25375	upstream	199	listed	1
Chr1	8903455	8903456	hy5-1_peak_251	50.6326	AT1G25380	upstream	14	listed	1
Chr1	8911590	8911591	hy5-1_peak_252	48.4644	AT1G25400	inside		listed	1
Chr1	8917976	8917977	hy5-1_peak_253	19.1906	AT1G25422	upstream	875		1
Chr1	8917976	8917977	hy5-1_peak_253	19.1906	AT1G25420	inside			1
Chr1	8935020	8935021	hy5-1_peak_254	43.2871	AT1G25440	inside			1
Chr1	8959433	8959434	hy5-1_peak_255	13.4214	AT1G25500	upstream	1456		1
Chr1	8959433	8959434	hy5-1_peak_255	13.4214	AT1G25510	inside			1
Chr1	8995912	8995913	hy5-1_peak_256	165.486	AT1G25570	upstream	417	listed	1
Chr1	9092733	9092734	hy5-1_peak_257	20.5931	AT1G26270	upstream	277	listed	1
Chr1	9128089	9128090	hy5-1_peak_258	86.1673	AT1G26380	inside			1
Chr1	9253557	9253558	hy5-1_peak_259	24.217	AT1G26761	upstream	1914		1
Chr1	9253557	9253558	hy5-1_peak_259	24.217	AT1G26762	upstream	73		1
Chr1	9365985	9365986	hy5-1_peak_260	97.4066	AT1G26976	downstream	376		1
Chr1	9365985	9365986	hy5-1_peak_260	97.4066	AT1G26985	upstream	1094		1
Chr1	9373813	9373814	hy5-1_peak_261	85.0582	AT1G27000	upstream	112		1
Chr1	9428974	9428975	hy5-1_peak_263	131.523	AT1G27140	downstream	259	listed	1
Chr1	9428974	9428975	hy5-1_peak_263	131.523	AT1G27150	upstream	72	listed	1
Chr1	9492867	9492868	hy5-1_peak_264	10.149	AT1G27320	downstream	296		1
Chr1	9492867	9492868	hy5-1_peak_264	10.149	AT1G27330	upstream	96	listed	1
Chr1	9499628	9499629	hy5-1_peak_265	29.0388	AT1G27350	upstream	204	listed	1
Chr1	9499628	9499629	hy5-1_peak_265	29.0388	AT1G27360	upstream	1448	listed	1
Chr1	9519158	9519159	hy5-1_peak_266	78.0957	AT1G27410	downstream	134		1
Chr1	9519158	9519159	hy5-1_peak_266	78.0957	AT1G27420	inside			1
Chr1	9539619	9539620	hy5-1_peak_267	15.0094	AT1G27470	downstream	493		1
Chr1	9539619	9539620	hy5-1_peak_267	15.0094	AT1G27461	upstream	607		1
Chr1	9544401	9544402	hy5-1_peak_268	55.757	AT1G27470	upstream	110		2
Chr1	9544401	9544402	hy5-1_peak_268	55.757	AT1G27480	upstream	112	listed	1
Chr1	9628863	9628864	hy5-1_peak_269	21.3313	AT1G27670	upstream	368		1
Chr1	9650783	9650784	hy5-1_peak_270	5.70192	AT1G27730	upstream	1711		1
Chr1	9754015	9754016	hy5-1_peak_271	206.605	AT1G27990	upstream	64		1
Chr1	9790432	9790433	hy5-1_peak_272	18.2898	AT1G28080	inside			1
Chr1	9827539	9827540	hy5-1_peak_273	198.455	AT1G28135	upstream	1721		1
Chr1	9827539	9827540	hy5-1_peak_273	198.455	AT1G28130	inside			1
Chr1	9950083	9950084	hy5-1_peak_274	14.6098	AT1G28350	downstream	284		1
Chr1	9950083	9950084	hy5-1_peak_274	14.6098	AT1G28360	upstream	1764	listed	1
Chr1	9952393	9952394	hy5-1_peak_275	42.4271	AT1G28360	inside		listed	2
Chr1	10019792	10019793	hy5-1_peak_276	9.15504	AT1G28500	inside			1
Chr1	10035597	10035598	hy5-1_peak_277	83.7926	AT1G28530	upstream	98		1
Chr1	10035597	10035598	hy5-1_peak_277	83.7926	AT1G28540	upstream	66		1
Chr1	10203060	10203061	hy5-1_peak_278	50.7166	AT1G29195	inside			1
Chr1	10237339	10237340	hy5-1_peak_279	70.2868	AT1G29280	inside		listed	1
Chr1	10261105	10261106	hy5-1_peak_280	161.82	AT1G29330	inside		listed	1
Chr1	10288116	10288117	hy5-1_peak_281	14.0238	AT1G29395	downstream	80	listed	1
Chr1	10288116	10288117	hy5-1_peak_281	14.0238	AT1G29390	upstream	14	listed	1
Chr1	10309739	10309740	hy5-1_peak_282	14.0797	AT1G29460	upstream	1597		1
Chr1	10309739	10309740	hy5-1_peak_282	14.0797	AT1G29465	inside			1
Chr1	10354070	10354071	hy5-1_peak_283	200.208	AT1G29630	downstream	335		1
Chr1	10365295	10365296	hy5-1_peak_284	8.66231		no hit			0
Chr1	10611010	10611011	hy5-1_peak_285	57.4291	AT1G30170	upstream	1393		1
Chr1	10679976	10679977	hy5-1_peak_286	26.2949	AT1G30320	upstream	269	listed	1
Chr1	10810937	10810938	hy5-1_peak_287	296.888	AT1G30510	upstream	1750		1
Chr1	10810937	10810938	hy5-1_peak_287	296.888	AT1G30515	upstream	1023	listed	1
Chr1	10810937	10810938	hy5-1_peak_287	296.888	AT1G30520	upstream	46	listed	1
Chr1	10860544	10860545	hy5-1_peak_288	81.0667	AT1G30630	upstream	284	listed	1
Chr1	10860544	10860545	hy5-1_peak_288	81.0667	AT1G30640	upstream	110	listed	1
Chr1	10893032	10893033	hy5-1_peak_289	78.8305	AT1G30700	inside		listed	1
Chr1	10904063	10904064	hy5-1_peak_290	222.105	AT1G30740	inside		listed	1
Chr1	10956450	10956451	hy5-1_peak_292	109.665		no hit			0
Chr1	10975403	10975404	hy5-1_peak_293	370.383	AT1G30840	inside		listed	1
Chr1	11036423	11036424	hy5-1_peak_294	8.829	AT1G30950	inside			1
Chr1	11119570	11119571	hy5-1_peak_295	36.2537	AT1G31150	upstream	526	listed	1
Chr1	11119570	11119571	hy5-1_peak_295	36.2537	AT1G31140	inside		listed	1
Chr1	11204859	11204860	hy5-1_peak_296	8.16235		no hit			0
Chr1	11396359	11396360	hy5-1_peak_297	7.61139	AT1G31790	upstream	342		1
Chr1	11396359	11396360	hy5-1_peak_297	7.61139	AT1G31800	upstream	42	listed	1
Chr1	11445280	11445281	hy5-1_peak_298	17.4368	AT1G31880	upstream	209	listed	1
Chr1	11531983	11531984	hy5-1_peak_299	15.3714	AT1G32060	upstream	549		1
Chr1	11561967	11561968	hy5-1_peak_300	182.804	AT1G32130	upstream	48	listed	1
Chr1	11605402	11605403	hy5-1_peak_301	126.464	AT1G32210	downstream	454		1
Chr1	11605402	11605403	hy5-1_peak_301	126.464	AT1G32200	upstream	343		1
Chr1	11655088	11655089	hy5-1_peak_302	103.731	AT1G32310	downstream	295		1
Chr1	11655088	11655089	hy5-1_peak_302	103.731	AT1G32320	upstream	67		1
Chr1	11717755	11717756	hy5-1_peak_304	10.3897	AT1G32450	inside		listed	1
Chr1	11774364	11774365	hy5-1_peak_305	238.694	AT1G32550	upstream	178	listed	1
Chr1	11774364	11774365	hy5-1_peak_305	238.694	AT1G32560	upstream	119	listed	1
Chr1	11833031	11833032	hy5-1_peak_306	33.7811	AT1G32710	upstream	81	listed	1
Chr1	11833031	11833032	hy5-1_peak_306	33.7811	AT1G32720	upstream	1870	listed	1
Chr1	11867451	11867452	hy5-1_peak_307	98.401	AT1G32770	upstream	502		1
Chr1	11874598	11874599	hy5-1_peak_308	26.6249	AT1G32790	downstream	105		1
Chr1	11874598	11874599	hy5-1_peak_308	26.6249	AT1G32780	upstream	1673		1
Chr1	11915168	11915169	hy5-1_peak_309	6.94964	AT1G32880	upstream	434		1
Chr1	11920129	11920130	hy5-1_peak_310	19.9487	AT1G32900	downstream	260	listed	1
Chr1	11953655	11953656	hy5-1_peak_311	13.5058	AT1G32970	upstream	1674		1
Chr1	11953655	11953656	hy5-1_peak_311	13.5058	AT1G32975	inside			1
Chr1	12011215	12011216	hy5-1_peak_312	12.2306	AT1G33120	inside			1
Chr1	12023581	12023582	hy5-1_peak_313	12.5881	AT1G33140	inside			1
Chr1	12123135	12123136	hy5-1_peak_314	297.911	AT1G33415	inside			1
Chr1	12123135	12123136	hy5-1_peak_314	297.911	AT1G33420	inside		listed	1
Chr1	12177818	12177819	hy5-1_peak_315	9.01204	AT1G33590	inside		listed	1
Chr1	12222751	12222752	hy5-1_peak_316	40.5106	AT1G33720	inside			1
Chr1	12251938	12251939	hy5-1_peak_317	23.1795		no hit			0
Chr1	12417665	12417666	hy5-1_peak_318	46.4963	AT1G34110	inside			1
Chr1	12478353	12478354	hy5-1_peak_319	15.6927		no hit			0
Chr1	12530670	12530671	hy5-1_peak_320	11.8479	AT1G34340	upstream	156		1
Chr1	12584403	12584404	hy5-1_peak_321	224.554	AT1G34419	upstream	1198		1
Chr1	12584403	12584404	hy5-1_peak_321	224.554	AT1G34420	upstream	183	listed	1
Chr1	12644479	12644480	hy5-1_peak_322	8.43663		no hit			0
Chr1	12660202	12660203	hy5-1_peak_323	9.98499	AT1G34575	upstream	1471		1
Chr1	12660202	12660203	hy5-1_peak_323	9.98499	AT1G34580	upstream	348		1
Chr1	12661931	12661932	hy5-1_peak_324	49.3886	AT1G34580	inside			2
Chr1	12768527	12768528	hy5-1_peak_325	30.818	AT1G34792	upstream	1877		1
Chr1	12771933	12771934	hy5-1_peak_326	25.8156	AT1G34795	upstream	1803		1
Chr1	12778745	12778746	hy5-1_peak_327	22.8129	AT1G34805	upstream	1890		1
Chr1	12782162	12782163	hy5-1_peak_328	26.3061	AT1G34810	upstream	1893		1
Chr1	12785588	12785589	hy5-1_peak_329	25.3832	AT1G34815	upstream	1905		1
Chr1	12792410	12792411	hy5-1_peak_330	31.0681	AT1G34825	upstream	1806		1
Chr1	12795815	12795816	hy5-1_peak_331	21.3712	AT1G34830	upstream	1793		1
Chr1	12799154	12799155	hy5-1_peak_332	24.0853	AT1G34840	upstream	1908		1
Chr1	13357189	13357190	hy5-1_peak_333	140.135		no hit			0
Chr1	13403283	13403284	hy5-1_peak_334	70.0266		no hit			0
Chr1	13604577	13604578	hy5-1_peak_335	170.59		no hit			0
Chr1	13989753	13989754	hy5-1_peak_336	18.018		no hit			0
Chr1	14113611	14113612	hy5-1_peak_337	20.8556		no hit			0
Chr1	14311362	14311363	hy5-1_peak_338	24.7936		no hit			0
Chr1	14609536	14609537	hy5-1_peak_340	10.3114		no hit			0
Chr1	14659456	14659457	hy5-1_peak_341	7.41382		no hit			0
Chr1	14720987	14720988	hy5-1_peak_342	4.99599		no hit			0
Chr1	15082282	15082283	hy5-1_peak_343	107.286	AT1G40104	inside			1
Chr1	15094783	15094784	hy5-1_peak_344	7.40109		no hit			0
Chr1	15138328	15138329	hy5-1_peak_345	5.56154		no hit			0
Chr1	15267221	15267222	hy5-1_peak_346	15.6411		no hit			0
Chr1	15365357	15365358	hy5-1_peak_347	15.1136		no hit			0
Chr1	15389569	15389570	hy5-1_peak_348	6.80056		no hit			0
Chr1	15437141	15437142	hy5-1_peak_349	12.8072		no hit			0
Chr1	15550152	15550153	hy5-1_peak_350	12.9247		no hit			0
Chr1	15701384	15701385	hy5-1_peak_351	9.21497		no hit			0
Chr1	16231323	16231324	hy5-1_peak_352	30.705	AT1G43130	upstream	91	listed	1
Chr1	16231323	16231324	hy5-1_peak_352	30.705	AT1G43140	upstream	1461	listed	1
Chr1	16341202	16341203	hy5-1_peak_353	15.8227		no hit			0
Chr1	16342903	16342904	hy5-1_peak_354	42.049		no hit			0
Chr1	16412522	16412523	hy5-1_peak_355	13.2676	AT1G43580	inside		listed	1
Chr1	16510465	16510466	hy5-1_peak_356	10.7265	AT1G43730	upstream	682		1
Chr1	16594744	16594745	hy5-1_peak_357	15.5264		no hit			0
Chr1	16643484	16643485	hy5-1_peak_358	53.9316		no hit			0
Chr1	16739627	16739628	hy5-1_peak_359	30.5197	AT1G44050	inside			1
Chr1	16831020	16831021	hy5-1_peak_360	281.065	AT1G44318	inside			1
Chr1	16851306	16851307	hy5-1_peak_361	144.401	AT1G44446	upstream	83	listed	1
Chr1	16865221	16865222	hy5-1_peak_362	5.86148	AT1G44542	inside			1
Chr1	16875326	16875327	hy5-1_peak_363	70.9387	AT1G44608	inside		listed	1
Chr1	17034673	17034674	hy5-1_peak_364	19.8749	AT1G45063	inside			1
Chr1	17179505	17179506	hy5-1_peak_365	11.7637	AT1G45474	inside		listed	1
Chr1	17253762	17253763	hy5-1_peak_366	13.0355	AT1G46554	inside			1
Chr1	17268444	17268445	hy5-1_peak_367	170.203	AT1G46768	upstream	1909	listed	1
Chr1	17268444	17268445	hy5-1_peak_367	170.203	AT1G46840	upstream	1740	listed	1
Chr1	17291101	17291102	hy5-1_peak_368	213.334		no hit			0
Chr1	17340253	17340254	hy5-1_peak_369	19	AT1G47300	inside			1
Chr1	17686479	17686480	hy5-1_peak_370	11.7133	AT1G47970	upstream	789	listed	1
Chr1	17687547	17687548	hy5-1_peak_371	18.9627	AT1G47970	inside		listed	2
Chr1	17693983	17693984	hy5-1_peak_372	13.3859	AT1G47980	upstream	117		1
Chr1	17704446	17704447	hy5-1_peak_373	28.5083	AT1G48000	inside			1
Chr1	17736133	17736134	hy5-1_peak_374	12.5887	AT1G48090	inside			1
Chr1	17765299	17765300	hy5-1_peak_375	118.228	AT1G48100	upstream	1574	listed	1
Chr1	17846799	17846800	hy5-1_peak_376	74.2879	AT1G48300	upstream	556	listed	1
Chr1	17882952	17882953	hy5-1_peak_377	22.4937	AT1G48400	inside			1
Chr1	17892670	17892671	hy5-1_peak_378	38.7038	AT1G48410	upstream	75	listed	1
Chr1	17913519	17913520	hy5-1_peak_379	199.4	AT1G48460	downstream	220		1
Chr1	17913519	17913520	hy5-1_peak_379	199.4	AT1G48470	upstream	191		1
Chr1	17920426	17920427	hy5-1_peak_380	204.536	AT1G48480	inside			1
Chr1	17972375	17972376	hy5-1_peak_381	29.8581	AT1G48610	inside			1
Chr1	17976577	17976578	hy5-1_peak_382	146.822	AT1G48620	upstream	189		1
Chr1	18018879	18018880	hy5-1_peak_383	20.3771	AT1G48720	downstream	439		1
Chr1	18036116	18036117	hy5-1_peak_384	300.608	AT1G48750	inside			1
Chr1	18036116	18036117	hy5-1_peak_384	300.608	AT1G48760	inside			1
Chr1	18250109	18250110	hy5-1_peak_385	18.9154	AT1G49330	inside			1
Chr1	18379886	18379887	hy5-1_peak_386	76.0862	AT1G49650	upstream	1253		1
Chr1	18379886	18379887	hy5-1_peak_386	76.0862	AT1G49660	upstream	88	listed	1
Chr1	18456584	18456585	hy5-1_peak_387	50.6326	AT1G49850	upstream	41		1
Chr1	18493351	18493352	hy5-1_peak_388	58.3347	AT1G49952	upstream	94		1
Chr1	18512199	18512200	hy5-1_peak_389	12.7126	AT1G49990	upstream	1428		1
Chr1	18512199	18512200	hy5-1_peak_389	12.7126	AT1G49980	inside			1
Chr1	18635370	18635371	hy5-1_peak_390	14.1027	AT1G50310	upstream	613		1
Chr1	18690790	18690791	hy5-1_peak_391	80.6555	AT1G50450	upstream	420	listed	1
Chr1	18744240	18744241	hy5-1_peak_392	21.1951	AT1G50610	inside			1
Chr1	18763831	18763832	hy5-1_peak_393	123.229	AT1G50650	inside			1
Chr1	18802642	18802643	hy5-1_peak_394	36.6327	AT1G50730	downstream	454	listed	1
Chr1	18802642	18802643	hy5-1_peak_394	36.6327	AT1G50732	upstream	45	listed	1
Chr1	18945879	18945880	hy5-1_peak_395	9.93029	AT1G51140	upstream	127		1
Chr1	18946505	18946506	hy5-1_peak_396	22.0512	AT1G51140	upstream	753		2
Chr1	19041600	19041601	hy5-1_peak_397	182.006	AT1G51355	inside			1
Chr1	19054456	19054457	hy5-1_peak_398	7.9727	AT1G51400	upstream	1875		1
Chr1	19161273	19161274	hy5-1_peak_399	331.264	AT1G51680	inside		listed	1
Chr1	19258005	19258006	hy5-1_peak_400	30.3603	AT1G51850	upstream	1223		1
Chr1	19258005	19258006	hy5-1_peak_400	30.3603	AT1G51860	inside			1
Chr1	19263201	19263202	hy5-1_peak_401	18.0328	AT1G51860	upstream	1723		2
Chr1	19263201	19263202	hy5-1_peak_401	18.0328	AT1G51870	inside			1
Chr1	19454761	19454762	hy5-1_peak_403	63.6872	AT1G52220	upstream	65		1
Chr1	19454761	19454762	hy5-1_peak_403	63.6872	AT1G52230	upstream	74		1
Chr1	19489266	19489267	hy5-1_peak_404	385.867	AT1G52325	upstream	849		1
Chr1	19489266	19489267	hy5-1_peak_404	385.867	AT1G52330	inside		listed	1
Chr1	19581900	19581901	hy5-1_peak_405	19.449	AT1G52565	upstream	1215	listed	1
Chr1	19590373	19590374	hy5-1_peak_406	403.339	AT1G52590	upstream	101	listed	1
Chr1	19590373	19590374	hy5-1_peak_406	403.339	AT1G52600	upstream	113	listed	1
Chr1	19619543	19619544	hy5-1_peak_407	22.4751	AT1G52670	upstream	1972		1
Chr1	19619543	19619544	hy5-1_peak_407	22.4751	AT1G52680	upstream	523		1
Chr1	19619543	19619544	hy5-1_peak_407	22.4751	AT1G52690	upstream	201		1
Chr1	19759834	19759835	hy5-1_peak_408	253.586	AT1G53030	downstream	166		1
Chr1	19759834	19759835	hy5-1_peak_408	253.586	AT1G53025	upstream	212		1
Chr1	19812207	19812208	hy5-1_peak_409	6.4821	AT1G53163	upstream	54		1
Chr1	19812207	19812208	hy5-1_peak_409	6.4821	AT1G53165	upstream	1596		1
Chr1	19825545	19825546	hy5-1_peak_410	29.7376		no hit			0
Chr1	19841489	19841490	hy5-1_peak_411	58.1339	AT1G53200	inside			1
Chr1	19853196	19853197	hy5-1_peak_412	6.46271	AT1G53230	upstream	1472		1
Chr1	19867422	19867423	hy5-1_peak_413	27.4278	AT1G53280	upstream	34	listed	1
Chr1	19875549	19875550	hy5-1_peak_414	7.82877		no hit			0
Chr1	19924579	19924580	hy5-1_peak_415	292.885	AT1G53400	upstream	172	listed	1
Chr1	20036589	20036590	hy5-1_peak_416	11.9907	AT1G53670	upstream	51	listed	1
Chr1	20036589	20036590	hy5-1_peak_416	11.9907	AT1G53680	upstream	1768	listed	1
Chr1	20049671	20049672	hy5-1_peak_417	51.518	AT1G53700	inside		listed	1
Chr1	20073703	20073704	hy5-1_peak_418	9.11715	AT1G53780	downstream	292		1
Chr1	20073703	20073704	hy5-1_peak_418	9.11715	AT1G53770	inside			1
Chr1	20098831	20098832	hy5-1_peak_419	21.2773	AT1G53830	inside			1
Chr1	20192183	20192184	hy5-1_peak_420	12.6983	AT1G54090	downstream	284		1
Chr1	20192183	20192184	hy5-1_peak_420	12.6983	AT1G54095	upstream	778	listed	1
Chr1	20210027	20210028	hy5-1_peak_421	350.279	AT1G54130	upstream	845	listed	1
Chr1	20227761	20227762	hy5-1_peak_422	12.6983	AT1G54170	upstream	1814		1
Chr1	20227761	20227762	hy5-1_peak_422	12.6983	AT1G54180	inside			1
Chr1	20259349	20259350	hy5-1_peak_423	144.008	AT1G54270	upstream	342		1
Chr1	20259349	20259350	hy5-1_peak_423	144.008	AT1G54260	inside			1
Chr1	20272656	20272657	hy5-1_peak_424	8.82565	AT1G54310	upstream	910		1
Chr1	20292107	20292108	hy5-1_peak_425	153.057	AT1G54355	upstream	1792		1
Chr1	20292107	20292108	hy5-1_peak_425	153.057	AT1G54360	inside			1
Chr1	20358958	20358959	hy5-1_peak_426	9.90297	AT1G54500	upstream	1171		1
Chr1	20358958	20358959	hy5-1_peak_426	9.90297	AT1G54510	inside			1
Chr1	20458879	20458880	hy5-1_peak_427	32.882	AT1G54860	upstream	249		1
Chr1	20458879	20458880	hy5-1_peak_427	32.882	AT1G54870	upstream	126		1
Chr1	20493904	20493905	hy5-1_peak_428	69.3033		no hit			0
Chr1	20606717	20606718	hy5-1_peak_429	23.3438	AT1G55240	downstream	313		1
Chr1	20606717	20606718	hy5-1_peak_429	23.3438	AT1G55250	upstream	312		1
Chr1	20728251	20728252	hy5-1_peak_431	10.9161	AT1G55525	downstream	77	listed	1
Chr1	20728251	20728252	hy5-1_peak_431	10.9161	AT1G55520	upstream	161	listed	1
Chr1	20772272	20772273	hy5-1_peak_432	14.0868	AT1G55590	upstream	402		1
Chr1	20772272	20772273	hy5-1_peak_432	14.0868	AT1G55591	inside			1
Chr1	20838819	20838820	hy5-1_peak_433	79.0708	AT1G55740	upstream	42		1
Chr1	20864157	20864158	hy5-1_peak_434	18.4217	AT1G55820	upstream	181	listed	1
Chr1	20864157	20864158	hy5-1_peak_434	18.4217	AT1G55810	inside		listed	1
Chr1	20965252	20965253	hy5-1_peak_435	10.7183	AT1G56050	inside			1
Chr1	21014783	21014784	hy5-1_peak_436	38.4489	AT1G56145	upstream	766	listed	1
Chr1	21036765	21036766	hy5-1_peak_437	12.5881	AT1G56210	inside		listed	1
Chr1	21043252	21043253	hy5-1_peak_438	99.9466	AT1G56220	upstream	95	listed	1
Chr1	21088612	21088613	hy5-1_peak_439	135.305	AT1G56330	upstream	64	listed	1
Chr1	21092740	21092741	hy5-1_peak_440	47.835	AT1G56345	downstream	252	listed	1
Chr1	21092740	21092741	hy5-1_peak_440	47.835	AT1G56340	upstream	81	listed	1
Chr1	21137183	21137184	hy5-1_peak_441	13.8139	AT1G56430	inside		listed	1
Chr1	21207099	21207100	hy5-1_peak_442	128.282	AT1G56600	upstream	437	listed	1
Chr1	21387033	21387034	hy5-1_peak_443	22.4751	AT1G57750	upstream	1325		1
Chr1	21419447	21419448	hy5-1_peak_444	11.8832	AT1G57820	upstream	1502		1
Chr1	21419447	21419448	hy5-1_peak_444	11.8832	AT1G57830	upstream	861		1
Chr1	21607307	21607308	hy5-1_peak_445	7.13906	AT1G58260	inside			1
Chr1	21617440	21617441	hy5-1_peak_446	223.705		no hit			0
Chr1	21676466	21676467	hy5-1_peak_447	25.0531	AT1G58360	upstream	63		1
Chr1	21732537	21732538	hy5-1_peak_448	100.666	AT1G58520	inside			1
Chr1	21913966	21913967	hy5-1_peak_449	57.727		no hit			0
Chr1	21939948	21939949	hy5-1_peak_450	8.08396	AT1G59710	inside		listed	1
Chr1	21939948	21939949	hy5-1_peak_450	8.08396	AT1G59720	inside		listed	1
Chr1	21956513	21956514	hy5-1_peak_451	16.9722		no hit			0
Chr1	22031760	22031761	hy5-1_peak_453	6.49641	AT1G59850	upstream	1554		1
Chr1	22031760	22031761	hy5-1_peak_453	6.49641	AT1G59860	inside			1
Chr1	22070871	22070872	hy5-1_peak_454	10.859	AT1G59960	downstream	420		1
Chr1	22070871	22070872	hy5-1_peak_454	10.859	AT1G59950	upstream	284		1
Chr1	22125328	22125329	hy5-1_peak_455	95.5427	AT1G60050	upstream	1627		1
Chr1	22149796	22149797	hy5-1_peak_456	5.6386	AT1G60070	upstream	270		1
Chr1	22149796	22149797	hy5-1_peak_456	5.6386	AT1G60073	upstream	139		1
Chr1	22149796	22149797	hy5-1_peak_456	5.6386	AT1G60072	inside			1
Chr1	22198173	22198174	hy5-1_peak_457	24.0946	AT1G60190	upstream	229	listed	1
Chr1	22227752	22227753	hy5-1_peak_458	17.366	AT1G60280	inside			1
Chr1	22576027	22576028	hy5-1_peak_459	15.9441	AT1G61224	upstream	1085		1
Chr1	22576027	22576028	hy5-1_peak_459	15.9441	AT1G61226	upstream	1389		1
Chr1	22594245	22594246	hy5-1_peak_460	124.092	AT1G61260	inside			1
Chr1	22627971	22627972	hy5-1_peak_461	142.287	AT1G61340	upstream	293	listed	1
Chr1	22646134	22646135	hy5-1_peak_462	94.5552	AT1G61370	upstream	988	listed	1
Chr1	22646134	22646135	hy5-1_peak_462	94.5552	AT1G61380	inside		listed	1
Chr1	22699960	22699961	hy5-1_peak_463	18.5292	AT1G61520	inside			1
Chr1	22724101	22724102	hy5-1_peak_464	7.65924	AT1G61580	upstream	950		1
Chr1	22724101	22724102	hy5-1_peak_464	7.65924	AT1G61590	inside			1
Chr1	22814240	22814241	hy5-1_peak_465	16.9907	AT1G61780	upstream	88		1
Chr1	22814240	22814241	hy5-1_peak_465	16.9907	AT1G61790	upstream	149	listed	1
Chr1	22870940	22870941	hy5-1_peak_466	107.163	AT1G61890	inside		listed	1
Chr1	22977674	22977675	hy5-1_peak_467	145.52	AT1G62180	upstream	50	listed	1
Chr1	22977674	22977675	hy5-1_peak_467	145.52	AT1G62181	upstream	37	listed	1
Chr1	23053892	23053893	hy5-1_peak_468	32.3632	AT1G62340	inside			1
Chr1	23072865	23072866	hy5-1_peak_469	12.2047	AT1G62370	inside		listed	1
Chr1	23088378	23088379	hy5-1_peak_470	56.5886	AT1G62390	upstream	1252	listed	1
Chr1	23088378	23088379	hy5-1_peak_470	56.5886	AT1G62400	upstream	1864	listed	1
Chr1	23105156	23105157	hy5-1_peak_471	371.113	AT1G62420	upstream	510		1
Chr1	23126684	23126685	hy5-1_peak_472	113.513		no hit			0
Chr1	23230747	23230748	hy5-1_peak_474	15.4775	AT1G62730	upstream	12		1
Chr1	23230747	23230748	hy5-1_peak_474	15.4775	AT1G62740	upstream	208	listed	1
Chr1	23236591	23236592	hy5-1_peak_475	20.1582	AT1G62750	upstream	145	listed	1
Chr1	23252598	23252599	hy5-1_peak_476	33.6765	AT1G62780	upstream	1494	listed	1
Chr1	23252598	23252599	hy5-1_peak_476	33.6765	AT1G62790	inside		listed	1
Chr1	23368068	23368069	hy5-1_peak_477	64.6803	AT1G63030	inside			1
Chr1	23371683	23371684	hy5-1_peak_478	27.152		no hit			0
Chr1	23395438	23395439	hy5-1_peak_479	47.6708		no hit			0
Chr1	23473749	23473750	hy5-1_peak_480	272.198	AT1G63295	downstream	319	listed	1
Chr1	23473749	23473750	hy5-1_peak_480	272.198	AT1G63290	upstream	111	listed	1
Chr1	23515959	23515960	hy5-1_peak_481	43.4273	AT1G63420	inside		listed	1
Chr1	23534252	23534253	hy5-1_peak_482	8.76812	AT1G63460	upstream	763		1
Chr1	23534252	23534253	hy5-1_peak_482	8.76812	AT1G63450	inside			1
Chr1	23633011	23633012	hy5-1_peak_483	209	AT1G63710	inside		listed	1
Chr1	23690107	23690108	hy5-1_peak_484	305.079	AT1G63840	inside			1
Chr1	23706795	23706796	hy5-1_peak_485	69.3144	AT1G63870	downstream	335		1
Chr1	23706795	23706796	hy5-1_peak_485	69.3144	AT1G63860	upstream	791		1
Chr1	23716659	23716660	hy5-1_peak_486	291.478	AT1G63880	upstream	536		1
Chr1	23716659	23716660	hy5-1_peak_486	291.478	AT1G63900	inside			1
Chr1	23762214	23762215	hy5-1_peak_487	22.5282	AT1G64040	upstream	1657	listed	1
Chr1	23762214	23762215	hy5-1_peak_487	22.5282	AT1G64050	upstream	138	listed	1
Chr1	23778498	23778499	hy5-1_peak_488	13.2761	AT1G64070	upstream	1450	listed	1
Chr1	23778498	23778499	hy5-1_peak_488	13.2761	AT1G64065	inside		listed	1
Chr1	23895840	23895841	hy5-1_peak_490	93.9875		no hit			0
Chr1	23946175	23946176	hy5-1_peak_491	16.0074	AT1G64460	upstream	1496		1
Chr1	23946175	23946176	hy5-1_peak_491	16.0074	AT1G64470	upstream	404	listed	1
Chr1	24031110	24031111	hy5-1_peak_492	15.7034	AT1G64660	downstream	331	listed	1
Chr1	24031110	24031111	hy5-1_peak_492	15.7034	AT1G64670	inside		listed	1
Chr1	24061119	24061120	hy5-1_peak_493	172.392	AT1G64780	inside			1
Chr1	24127973	24127974	hy5-1_peak_494	6.32976	AT1G64960	upstream	1944		1
Chr1	24127973	24127974	hy5-1_peak_494	6.32976	AT1G64950	inside			1
Chr1	24171152	24171153	hy5-1_peak_495	144.252	AT1G65060	inside		listed	1
Chr1	24273771	24273772	hy5-1_peak_496	4.57795	AT1G65346	inside			1
Chr1	24273771	24273772	hy5-1_peak_496	4.57795	AT1G65350	inside			1
Chr1	24386271	24386272	hy5-1_peak_497	26.8606	AT1G65590	inside		listed	1
Chr1	24441001	24441002	hy5-1_peak_498	26.2863	AT1G65730	upstream	1502	listed	1
Chr1	24441001	24441002	hy5-1_peak_498	26.2863	AT1G65720	inside			1
Chr1	24653136	24653137	hy5-1_peak_499	70.6244	AT1G66190	inside		listed	1
Chr1	24666977	24666978	hy5-1_peak_500	8.98394	AT1G66210	inside			1
Chr1	24748472	24748473	hy5-1_peak_502	33.1209	AT1G66350	inside			1
Chr1	24831392	24831393	hy5-1_peak_504	144.832	AT1G66553	downstream	123		1
Chr1	24957440	24957441	hy5-1_peak_505	9.90297	AT1G66890	upstream	117		1
Chr1	24957440	24957441	hy5-1_peak_505	9.90297	AT1G66900	upstream	1893		1
Chr1	25016889	25016890	hy5-1_peak_506	214.022	AT1G67035	upstream	1187	listed	1
Chr1	25016889	25016890	hy5-1_peak_506	214.022	AT1G67030	inside		listed	1
Chr1	25049531	25049532	hy5-1_peak_507	6.40557	AT1G67090	upstream	108	listed	1
Chr1	25145143	25145144	hy5-1_peak_508	8.38184	AT1G67220	upstream	443		1
Chr1	25203126	25203127	hy5-1_peak_509	8.82565	AT1G67310	upstream	1	listed	1
Chr1	25225441	25225442	hy5-1_peak_510	78.3551		no hit			0
Chr1	25231050	25231051	hy5-1_peak_511	54.1446	AT1G67340	inside		listed	1
Chr1	25250613	25250614	hy5-1_peak_512	24.2499	AT1G67400	inside			1
Chr1	25329151	25329152	hy5-1_peak_513	3.53283	AT1G67580	inside			1
Chr1	25427077	25427078	hy5-1_peak_514	7.78654	AT1G67810	inside			1
Chr1	25442190	25442191	hy5-1_peak_515	33.6164	AT1G67850	downstream	49		1
Chr1	25442190	25442191	hy5-1_peak_515	33.6164	AT1G67855	downstream	65		1
Chr1	25442190	25442191	hy5-1_peak_515	33.6164	AT1G67856	upstream	213		1
Chr1	25447781	25447782	hy5-1_peak_516	64.3861	AT1G67865	upstream	1045		1
Chr1	25484408	25484409	hy5-1_peak_517	14.668	AT1G67970	downstream	290	listed	1
Chr1	25484408	25484409	hy5-1_peak_517	14.668	AT1G67960	upstream	147	listed	1
Chr1	25493140	25493141	hy5-1_peak_518	131.117	AT1G68000	downstream	88		1
Chr1	25493140	25493141	hy5-1_peak_518	131.117	AT1G68010	upstream	55		1
Chr1	25508426	25508427	hy5-1_peak_519	179.536	AT1G68050	upstream	249	listed	1
Chr1	25559173	25559174	hy5-1_peak_520	277.621	AT1G68190	upstream	72	listed	1
Chr1	25579271	25579272	hy5-1_peak_521	10.483	AT1G68250	downstream	101		1
Chr1	25599341	25599342	hy5-1_peak_522	22.7711	AT1G68310	upstream	149	listed	1
Chr1	25599341	25599342	hy5-1_peak_522	22.7711	AT1G68300	inside		listed	1
Chr1	25644745	25644746	hy5-1_peak_524	7.05225	AT1G68390	inside			1
Chr1	25677484	25677485	hy5-1_peak_525	423.711	AT1G68470	inside		listed	1
Chr1	25700644	25700645	hy5-1_peak_526	23.7895	AT1G68500	upstream	1358	listed	1
Chr1	25766803	25766804	hy5-1_peak_528	11.2884	AT1G68630	upstream	1735	listed	1
Chr1	25766803	25766804	hy5-1_peak_528	11.2884	AT1G68620	inside		listed	1
Chr1	25884160	25884161	hy5-1_peak_529	15.1113	AT1G68850	inside		listed	1
Chr1	25941624	25941625	hy5-1_peak_530	24.3665	AT1G69000	downstream	390		1
Chr1	25941624	25941625	hy5-1_peak_530	24.3665	AT1G68990	upstream	659		1
Chr1	25941624	25941625	hy5-1_peak_530	24.3665	AT1G69010	upstream	50	listed	1
Chr1	25951038	25951039	hy5-1_peak_531	18.5698	AT1G69030	upstream	1777	listed	1
Chr1	25974797	25974798	hy5-1_peak_532	23.2602	AT1G69080	upstream	1527		1
Chr1	26060568	26060569	hy5-1_peak_533	18.4284	AT1G69320	upstream	1293	listed	1
Chr1	26074857	26074858	hy5-1_peak_534	3.87438	AT1G69360	inside			1
Chr1	26113254	26113255	hy5-1_peak_535	67.8752	AT1G69460	upstream	12	listed	1
Chr1	26113254	26113255	hy5-1_peak_535	67.8752	AT1G69470	upstream	320	listed	1
Chr1	26120918	26120919	hy5-1_peak_536	76.9274	AT1G69485	upstream	1343	listed	1
Chr1	26120918	26120919	hy5-1_peak_536	76.9274	AT1G69490	upstream	1220	listed	1
Chr1	26123016	26123017	hy5-1_peak_537	136.617	AT1G69500	upstream	923	listed	1
Chr1	26123016	26123017	hy5-1_peak_537	136.617	AT1G69490	inside		listed	2
Chr1	26164529	26164530	hy5-1_peak_538	12.6351	AT1G69570	upstream	1034	listed	1
Chr1	26181850	26181851	hy5-1_peak_539	7.10829	AT1G69600	upstream	619	listed	1
Chr1	26195760	26195761	hy5-1_peak_540	10.1528	AT1G69640	upstream	66	listed	1
Chr1	26276348	26276349	hy5-1_peak_541	19.0086	AT1G69800	upstream	20		1
Chr1	26293229	26293230	hy5-1_peak_542	279.998	AT1G69840	downstream	371		1
Chr1	26293229	26293230	hy5-1_peak_542	279.998	AT1G69830	upstream	177		1
Chr1	26332062	26332063	hy5-1_peak_543	267.12	AT1G69910	inside		listed	1
Chr1	26393891	26393892	hy5-1_peak_544	56.4013	AT1G70070	inside			1
Chr1	26424558	26424559	hy5-1_peak_545	19.4413	AT1G70180	upstream	1782		1
Chr1	26424558	26424559	hy5-1_peak_545	19.4413	AT1G70170	inside			1
Chr1	26439473	26439474	hy5-1_peak_546	294.917	AT1G70209	downstream	179		1
Chr1	26439473	26439474	hy5-1_peak_546	294.917	AT1G70210	upstream	390	listed	1
Chr1	26453788	26453789	hy5-1_peak_547	18.3734	AT1G70250	inside		listed	1
Chr1	26469599	26469600	hy5-1_peak_548	8.9404	AT1G70280	upstream	894		1
Chr1	26484994	26484995	hy5-1_peak_549	274.574	AT1G70310	downstream	311		1
Chr1	26513151	26513152	hy5-1_peak_550	24.7991	AT1G70370	inside		listed	1
Chr1	26517336	26517337	hy5-1_peak_551	26.3828		no hit			0
Chr1	26541483	26541484	hy5-1_peak_552	53.3754	AT1G70420	upstream	722	listed	1
Chr1	26569744	26569745	hy5-1_peak_553	146.39	AT1G70500	upstream	1016		1
Chr1	26569744	26569745	hy5-1_peak_553	146.39	AT1G70505	upstream	902		1
Chr1	26606436	26606437	hy5-1_peak_554	41.4722	AT1G70560	inside			1
Chr1	26652593	26652594	hy5-1_peak_555	192.256	AT1G70690	inside		listed	1
Chr1	26666961	26666962	hy5-1_peak_556	41.7379	AT1G70720	inside			1
Chr1	26696498	26696499	hy5-1_peak_557	62.79	AT1G70780	upstream	107		1
Chr1	26696498	26696499	hy5-1_peak_557	62.79	AT1G70782	upstream	107		1
Chr1	26722615	26722616	hy5-1_peak_558	10.3445	AT1G70880	downstream	265		1
Chr1	26722615	26722616	hy5-1_peak_558	10.3445	AT1G70870	upstream	1053		1
Chr1	26752473	26752474	hy5-1_peak_559	10.483	AT1G70950	upstream	215	listed	1
Chr1	26752473	26752474	hy5-1_peak_559	10.483	AT1G70949	inside			1
Chr1	26770324	26770325	hy5-1_peak_560	10.7187	AT1G71000	upstream	214	listed	1
Chr1	26797918	26797919	hy5-1_peak_561	113.491	AT1G71030	upstream	1555		1
Chr1	26797918	26797919	hy5-1_peak_561	113.491	AT1G71040	inside		listed	1
Chr1	26852031	26852032	hy5-1_peak_562	32.415	AT1G71220	downstream	113	listed	1
Chr1	26852031	26852032	hy5-1_peak_562	32.415	AT1G71230	upstream	429	listed	1
Chr1	26896177	26896178	hy5-1_peak_563	6.64598	AT1G71360	upstream	1376		1
Chr1	26966284	26966285	hy5-1_peak_564	15.1113	AT1G71696	upstream	602		1
Chr1	26966284	26966285	hy5-1_peak_564	15.1113	AT1G71695	inside			1
Chr1	27073551	27073552	hy5-1_peak_565	54.925		no hit			0
Chr1	27088318	27088319	hy5-1_peak_566	272.88	AT1G71960	upstream	71	listed	1
Chr1	27093549	27093550	hy5-1_peak_567	50.0063	AT1G71970	inside		listed	1
Chr1	27110743	27110744	hy5-1_peak_568	10.0625	AT1G72020	upstream	313	listed	1
Chr1	27110743	27110744	hy5-1_peak_568	10.0625	AT1G72030	upstream	121	listed	1
Chr1	27134165	27134166	hy5-1_peak_569	30.1091	AT1G72120	downstream	181		1
Chr1	27134165	27134166	hy5-1_peak_569	30.1091	AT1G72125	upstream	2		1
Chr1	27164136	27164137	hy5-1_peak_570	38.2884	AT1G72180	inside		listed	1
Chr1	27170675	27170676	hy5-1_peak_571	9.20725	AT1G72190	upstream	959		1
Chr1	27170675	27170676	hy5-1_peak_571	9.20725	AT1G72200	inside			1
Chr1	27218002	27218003	hy5-1_peak_572	145.847	AT1G72300	inside			1
Chr1	27259682	27259683	hy5-1_peak_573	20.2107	AT1G72416	inside			1
Chr1	27302449	27302450	hy5-1_peak_574	80.2057	AT1G72510	upstream	916	listed	1
Chr1	27349345	27349346	hy5-1_peak_575	7.88558	AT1G72645	downstream	127		1
Chr1	27349345	27349346	hy5-1_peak_575	7.88558	AT1G72640	upstream	1090		1
Chr1	27349345	27349346	hy5-1_peak_575	7.88558	AT1G72650	upstream	121		1
Chr1	27374171	27374172	hy5-1_peak_576	11.5266	AT1G72710	inside			1
Chr1	27389061	27389062	hy5-1_peak_577	17.4087	AT1G72760	upstream	788	listed	1
Chr1	27389061	27389062	hy5-1_peak_577	17.4087	AT1G72770	upstream	960	listed	1
Chr1	27402271	27402272	hy5-1_peak_578	14.2114	AT1G72810	upstream	1855		1
Chr1	27402271	27402272	hy5-1_peak_578	14.2114	AT1G72820	upstream	606	listed	1
Chr1	27409037	27409038	hy5-1_peak_579	17.6965	AT1G72840	downstream	199	listed	1
Chr1	27409037	27409038	hy5-1_peak_579	17.6965	AT1G72830	upstream	1069	listed	1
Chr1	27514869	27514870	hy5-1_peak_580	207.904	AT1G73170	upstream	73	listed	1
Chr1	27596090	27596091	hy5-1_peak_581	125.971	AT1G73390	upstream	949	listed	1
Chr1	27650895	27650896	hy5-1_peak_582	11.9042	AT1G73560	upstream	425		1
Chr1	27650895	27650896	hy5-1_peak_582	11.9042	AT1G73570	upstream	96		1
Chr1	27747886	27747887	hy5-1_peak_583	59.0723	AT1G73805	inside		listed	1
Chr1	27769317	27769318	hy5-1_peak_584	51.9108	AT1G73850	inside			1
Chr1	27780279	27780280	hy5-1_peak_585	135.097	AT1G73875	upstream	726		1
Chr1	27780279	27780280	hy5-1_peak_585	135.097	AT1G73870	inside			1
Chr1	27786281	27786282	hy5-1_peak_586	188.026	AT1G73885	upstream	582	listed	1
Chr1	27786281	27786282	hy5-1_peak_586	188.026	AT1G73880	inside		listed	1
Chr1	27790807	27790808	hy5-1_peak_587	193.423	AT1G73920	upstream	67	listed	1
Chr1	27824342	27824343	hy5-1_peak_588	25.2194	AT1G73980	upstream	307		1
Chr1	27824342	27824343	hy5-1_peak_588	25.2194	AT1G73990	upstream	90	listed	1
Chr1	27876796	27876797	hy5-1_peak_589	126.092	AT1G74140	upstream	108		1
Chr1	27901676	27901677	hy5-1_peak_590	29.2462	AT1G74180	upstream	769		1
Chr1	27982257	27982258	hy5-1_peak_591	11.1855	AT1G74440	upstream	1854		1
Chr1	27982257	27982258	hy5-1_peak_591	11.1855	AT1G74450	upstream	251		1
Chr1	27982257	27982258	hy5-1_peak_591	11.1855	AT1G74448	inside			1
Chr1	27999960	27999961	hy5-1_peak_592	18.785	AT1G74500	upstream	1140		1
Chr1	28107798	28107799	hy5-1_peak_593	258.499	AT1G74810	upstream	675		1
Chr1	28117469	28117470	hy5-1_peak_594	71.2719	AT1G74840	upstream	65	listed	1
Chr1	28164419	28164420	hy5-1_peak_595	11.3879	AT1G75010	downstream	420	listed	1
Chr1	28164419	28164420	hy5-1_peak_595	11.3879	AT1G75000	inside		listed	1
Chr1	28183103	28183104	hy5-1_peak_596	7.18675	AT1G75070	upstream	1428	listed	1
Chr1	28183103	28183104	hy5-1_peak_596	7.18675	AT1G75060	inside		listed	1
Chr1	28193660	28193661	hy5-1_peak_597	428.302	AT1G75110	downstream	454		1
Chr1	28193660	28193661	hy5-1_peak_597	428.302	AT1G75100	inside			1
Chr1	28284730	28284731	hy5-1_peak_598	302.827	AT1G75380	upstream	686	listed	1
Chr1	28313439	28313440	hy5-1_peak_599	16.2049	AT1G75440	upstream	47	listed	1
Chr1	28387145	28387146	hy5-1_peak_600	208.533		no hit			0
Chr1	28439849	28439850	hy5-1_peak_601	227.428	AT1G75730	upstream	81		1
Chr1	28439849	28439850	hy5-1_peak_601	227.428	AT1G75740	upstream	1039	listed	1
Chr1	28460362	28460363	hy5-1_peak_602	25.8427	AT1G75810	upstream	1301	listed	1
Chr1	28460362	28460363	hy5-1_peak_602	25.8427	AT1G75800	inside		listed	1
Chr1	28509389	28509390	hy5-1_peak_603	34.6277	AT1G75940	upstream	1778		1
Chr1	28509389	28509390	hy5-1_peak_603	34.6277	AT1G75930	inside			1
Chr1	28533695	28533696	hy5-1_peak_604	308.881	AT1G76020	upstream	129		1
Chr1	28533695	28533696	hy5-1_peak_604	308.881	AT1G76030	upstream	102	listed	1
Chr1	28554873	28554874	hy5-1_peak_605	123.986	AT1G76110	downstream	168	listed	1
Chr1	28554873	28554874	hy5-1_peak_605	123.986	AT1G76100	upstream	106	listed	1
Chr1	28595699	28595700	hy5-1_peak_606	9.5017	AT1G76210	inside			1
Chr1	28603330	28603331	hy5-1_peak_607	372.806	AT1G76240	inside			1
Chr1	28625284	28625285	hy5-1_peak_608	51.8103	AT1G76300	upstream	599		1
Chr1	28625284	28625285	hy5-1_peak_608	51.8103	AT1G76290	inside			1
Chr1	28746837	28746838	hy5-1_peak_609	277.026	AT1G76600	upstream	50	listed	1
Chr1	28823467	28823468	hy5-1_peak_610	68.6736	AT1G76790	inside		listed	1
Chr1	28878253	28878254	hy5-1_peak_611	425.826		no hit			0
Chr1	28928610	28928611	hy5-1_peak_612	79.6279	AT1G76980	upstream	1272		1
Chr1	28940213	28940214	hy5-1_peak_613	159.724	AT1G77000	inside		listed	1
Chr1	29012595	29012596	hy5-1_peak_614	23.941	AT1G77210	upstream	500		1
Chr1	29012595	29012596	hy5-1_peak_614	23.941	AT1G77220	upstream	121		1
Chr1	29035613	29035614	hy5-1_peak_615	180.13	AT1G77280	inside		listed	1
Chr1	29073766	29073767	hy5-1_peak_616	252.569	AT1G77360	upstream	231		1
Chr1	29073766	29073767	hy5-1_peak_616	252.569	AT1G77370	upstream	76		1
Chr1	29093506	29093507	hy5-1_peak_617	8.91829	AT1G77410	upstream	243		1
Chr1	29093506	29093507	hy5-1_peak_617	8.91829	AT1G77420	inside		listed	1
Chr1	29099749	29099750	hy5-1_peak_618	207.725	AT1G77450	upstream	204	listed	1
Chr1	29114148	29114149	hy5-1_peak_619	25.5154	AT1G77480	downstream	409		1
Chr1	29114148	29114149	hy5-1_peak_619	25.5154	AT1G77470	inside			1
Chr1	29179317	29179318	hy5-1_peak_620	31.0768	AT1G77650	upstream	1792	listed	1
Chr1	29179317	29179318	hy5-1_peak_620	31.0768	AT1G77640	inside		listed	1
Chr1	29217933	29217934	hy5-1_peak_621	76.1475		no hit			0
Chr1	29239221	29239222	hy5-1_peak_622	24.7948	AT1G77760	inside			1
Chr1	29249084	29249085	hy5-1_peak_623	33.3257	AT1G77770	upstream	1057		1
Chr1	29249084	29249085	hy5-1_peak_623	33.3257	AT1G77780	inside		listed	1
Chr1	29263202	29263203	hy5-1_peak_624	93.2528	AT1G77815	downstream	145		1
Chr1	29263202	29263203	hy5-1_peak_624	93.2528	AT1G77810	upstream	90		1
Chr1	29278138	29278139	hy5-1_peak_625	119.511	AT1G77855	inside		listed	1
Chr1	29284647	29284648	hy5-1_peak_626	4.26759	AT1G77860	upstream	190		1
Chr1	29284647	29284648	hy5-1_peak_626	4.26759	AT1G77870	upstream	430		1
Chr1	29329421	29329422	hy5-1_peak_627	6.03701	AT1G78000	upstream	313	listed	1
Chr1	29429376	29429377	hy5-1_peak_629	293.514	AT1G78230	upstream	848	listed	1
Chr1	29438817	29438818	hy5-1_peak_630	12.2245		no hit			0
Chr1	29452025	29452026	hy5-1_peak_631	4.02844	AT1G78280	upstream	529	listed	1
Chr1	29452025	29452026	hy5-1_peak_631	4.02844	AT1G78265	inside			1
Chr1	29452025	29452026	hy5-1_peak_631	4.02844	AT1G78270	inside		listed	1
Chr1	29537159	29537160	hy5-1_peak_633	13.3137	AT1G78510	inside			1
Chr1	29665440	29665441	hy5-1_peak_634	218.656	AT1G78900	downstream	490		1
Chr1	29665440	29665441	hy5-1_peak_634	218.656	AT1G78910	inside			1
Chr1	29701441	29701442	hy5-1_peak_635	11.8832	AT1G78960	downstream	179		1
Chr1	29701441	29701442	hy5-1_peak_635	11.8832	AT1G78970	upstream	1620		1
Chr1	29716183	29716184	hy5-1_peak_636	53.2758	AT1G79000	downstream	166	listed	1
Chr1	29716183	29716184	hy5-1_peak_636	53.2758	AT1G78990	upstream	1215	listed	1
Chr1	29716183	29716184	hy5-1_peak_636	53.2758	AT1G78995	upstream	73	listed	1
Chr1	29736502	29736503	hy5-1_peak_637	70.6578	AT1G79050	downstream	456	listed	1
Chr1	29736502	29736503	hy5-1_peak_637	70.6578	AT1G79040	inside		listed	1
Chr1	29782527	29782528	hy5-1_peak_638	9.40077	AT1G79160	upstream	1755		1
Chr1	29782527	29782528	hy5-1_peak_638	9.40077	AT1G79170	inside			1
Chr1	29873011	29873012	hy5-1_peak_639	14.4182	AT1G79420	inside		listed	1
Chr1	29887469	29887470	hy5-1_peak_640	103.394	AT1G79440	upstream	58		1
Chr1	29887469	29887470	hy5-1_peak_640	103.394	AT1G79450	upstream	219		1
Chr1	29919580	29919581	hy5-1_peak_641	30.2025	AT1G79530	upstream	347		1
Chr1	30018273	30018274	hy5-1_peak_642	10.5349	AT1G79790	upstream	43	listed	1
Chr1	30018273	30018274	hy5-1_peak_642	10.5349	AT1G79800	upstream	275	listed	1
Chr1	30018273	30018274	hy5-1_peak_642	10.5349	AT1G79810	upstream	1470	listed	1
Chr1	30114550	30114551	hy5-1_peak_643	44.2136	AT1G80050	upstream	1227	listed	1
Chr1	30131677	30131678	hy5-1_peak_644	66.2852	AT1G80090	inside		listed	1
Chr1	30190237	30190238	hy5-1_peak_645	197.617	AT1G80300	upstream	1618	listed	1
Chr1	30201972	30201973	hy5-1_peak_646	20.5931	AT1G80340	inside			1
Chr1	30208184	30208185	hy5-1_peak_647	30.2721	AT1G80360	downstream	314	listed	1
Chr1	30208184	30208185	hy5-1_peak_647	30.2721	AT1G80350	inside		listed	1
Chr1	30242316	30242317	hy5-1_peak_648	118.909	AT1G80440	inside		listed	1
Chr1	30303858	30303859	hy5-1_peak_649	3.74976	AT1G80620	upstream	1503	listed	1
Chr1	30303858	30303859	hy5-1_peak_649	3.74976	AT1G80610	inside		listed	1
Chr1	30371558	30371559	hy5-1_peak_650	15.9663	AT1G80820	inside			1
Chr1	30387735	30387736	hy5-1_peak_651	22.0512	AT1G80860	downstream	299	listed	1
Chr1	30387735	30387736	hy5-1_peak_651	22.0512	AT1G80850	upstream	214	listed	1
Chr1	30387735	30387736	hy5-1_peak_651	22.0512	AT1G80865	upstream	1802	listed	1
Chr2	1386	1387	hy5-1_peak_652	53.1683	AT2G01008	inside			1
Chr2	2829	2830	hy5-1_peak_653	44.5605	AT2G01008	downstream	20		2
Chr2	2829	2830	hy5-1_peak_653	44.5605	AT2G01010	upstream	876		1
Chr2	3579	3580	hy5-1_peak_654	47.399	AT2G01010	upstream	126		2
Chr2	4554	4555	hy5-1_peak_655	31.1215	AT2G01020	upstream	1227		1
Chr2	4554	4555	hy5-1_peak_655	31.1215	AT2G01010	inside			3
Chr2	5962	5963	hy5-1_peak_656	19.4951	AT2G01010	downstream	450		4
Chr2	5962	5963	hy5-1_peak_656	19.4951	AT2G01020	downstream	18		2
Chr2	5962	5963	hy5-1_peak_656	19.4951	AT2G01021	upstream	608		1
Chr2	10033	10034	hy5-1_peak_658	59.2724	AT2G01023	upstream	267		1
Chr2	175877	175878	hy5-1_peak_659	246.913	AT2G01400	downstream	261		1
Chr2	175877	175878	hy5-1_peak_659	246.913	AT2G01410	inside		listed	1
Chr2	183467	183468	hy5-1_peak_660	54.5834	AT2G01420	upstream	140		1
Chr2	183467	183468	hy5-1_peak_660	54.5834	AT2G01422	upstream	472		1
Chr2	236724	236725	hy5-1_peak_661	28.7409	AT2G01520	inside			1
Chr2	256423	256424	hy5-1_peak_662	6.57254	AT2G01570	inside		listed	1
Chr2	266546	266547	hy5-1_peak_663	302.092	AT2G01580	upstream	642		1
Chr2	266546	266547	hy5-1_peak_663	302.092	AT2G01590	upstream	83	listed	1
Chr2	274269	274270	hy5-1_peak_664	50.1101	AT2G01610	inside			1
Chr2	291822	291823	hy5-1_peak_665	31.9963	AT2G01660	inside		listed	1
Chr2	383480	383481	hy5-1_peak_666	88.6055	AT2G01850	upstream	1718	listed	1
Chr2	422084	422085	hy5-1_peak_667	173.03	AT2G01913	inside			1
Chr2	710377	710378	hy5-1_peak_669	6.74446	AT2G02610	upstream	334		1
Chr2	732791	732792	hy5-1_peak_670	7.57808	AT2G02640	inside			1
Chr2	761891	761892	hy5-1_peak_671	59.0331	AT2G02710	upstream	879	listed	1
Chr2	761891	761892	hy5-1_peak_671	59.0331	AT2G02720	upstream	1119	listed	1
Chr2	801471	801472	hy5-1_peak_672	128.194	AT2G02810	upstream	58	listed	1
Chr2	834426	834427	hy5-1_peak_673	10.075	AT2G02860	upstream	1972	listed	1
Chr2	870268	870269	hy5-1_peak_674	62.9505	AT2G02970	upstream	1980		1
Chr2	870268	870269	hy5-1_peak_674	62.9505	AT2G02980	inside			1
Chr2	875676	875677	hy5-1_peak_675	58.0965	AT2G03000	inside			1
Chr2	909039	909040	hy5-1_peak_676	70.5155	AT2G03070	inside			1
Chr2	959850	959851	hy5-1_peak_677	24.072	AT2G03170	upstream	1471		1
Chr2	959850	959851	hy5-1_peak_677	24.072	AT2G03160	inside			1
Chr2	1018068	1018069	hy5-1_peak_678	7.50032	AT2G03340	upstream	921		1
Chr2	1124268	1124269	hy5-1_peak_679	12.6871	AT2G03690	upstream	1098		1
Chr2	1124268	1124269	hy5-1_peak_679	12.6871	AT2G03700	upstream	808	listed	1
Chr2	1185388	1185389	hy5-1_peak_681	34.0344	AT2G03890	upstream	133	listed	1
Chr2	1289728	1289729	hy5-1_peak_683	349.658	AT2G04032	upstream	103		1
Chr2	1321180	1321181	hy5-1_peak_684	28.9014		no hit			0
Chr2	1515731	1515732	hy5-1_peak_685	46.3173	AT2G04340	downstream	192		1
Chr2	1515731	1515732	hy5-1_peak_685	46.3173	AT2G04350	upstream	73		1
Chr2	1604253	1604254	hy5-1_peak_686	10.075		no hit			0
Chr2	1641486	1641487	hy5-1_peak_687	17.3048	AT2G04680	inside		listed	1
Chr2	1851611	1851612	hy5-1_peak_688	8.516		no hit			0
Chr2	1966520	1966521	hy5-1_peak_689	10.859	AT2G05380	upstream	295		1
Chr2	1985855	1985856	hy5-1_peak_690	34.2159	AT2G05430	upstream	138		1
Chr2	2122093	2122094	hy5-1_peak_691	15.709		no hit			0
Chr2	2184799	2184800	hy5-1_peak_692	11.4351	AT2G05765	upstream	155		1
Chr2	2190121	2190122	hy5-1_peak_693	9.20391		no hit			0
Chr2	2289163	2289164	hy5-1_peak_694	13.9487	AT2G05940	inside		listed	1
Chr2	2350076	2350077	hy5-1_peak_695	11.7982	AT2G06025	inside		listed	1
Chr2	2361783	2361784	hy5-1_peak_696	8.9404	AT2G06050	inside			1
Chr2	2902005	2902006	hy5-1_peak_698	13.1507	AT2G07000	inside			1
Chr2	3061987	3061988	hy5-1_peak_699	28.6423		no hit			0
Chr2	3239938	3239939	hy5-1_peak_700	3.45854	AT2G07742	upstream	211		1
Chr2	3239938	3239939	hy5-1_peak_700	3.45854	AT2G07771	inside			1
Chr2	3351807	3351808	hy5-1_peak_701	9.68995	AT2G07599	upstream	596		1
Chr2	3351807	3351808	hy5-1_peak_701	9.68995	AT2G07696	inside			1
Chr2	3495936	3495937	hy5-1_peak_703	8.94383	AT2G07763	downstream	425		1
Chr2	3495936	3495937	hy5-1_peak_703	8.94383	AT2G07764	upstream	503		1
Chr2	3495936	3495937	hy5-1_peak_703	8.94383	AT2G07765	upstream	1421		1
Chr2	3495936	3495937	hy5-1_peak_703	8.94383	AT2G07739	inside			1
Chr2	3607138	3607139	hy5-1_peak_704	246.308		no hit			0
Chr2	3616825	3616826	hy5-1_peak_705	55.4524	AT2G08986	upstream	1232		1
Chr2	3616825	3616826	hy5-1_peak_705	55.4524	AT2G07981	inside			1
Chr2	3619807	3619808	hy5-1_peak_706	28.2429	AT2G08986	inside			2
Chr2	3621696	3621697	hy5-1_peak_707	15.528	AT2G08986	inside			3
Chr2	3623444	3623445	hy5-1_peak_708	25.8724	AT2G08986	inside			4
Chr2	3626170	3626171	hy5-1_peak_709	96.2457	AT2G08986	inside			5
Chr2	3655113	3655114	hy5-1_peak_711	16.6316		no hit			0
Chr2	3664299	3664300	hy5-1_peak_712	16.8595		no hit			0
Chr2	3718249	3718250	hy5-1_peak_713	153.559		no hit			0
Chr2	3896298	3896299	hy5-1_peak_714	16.9775		no hit			0
Chr2	4744163	4744164	hy5-1_peak_715	9.81372	AT2G11810	inside			1
Chr2	5009866	5009867	hy5-1_peak_716	9.15504	AT2G12400	upstream	1545		1
Chr2	5200037	5200038	hy5-1_peak_717	13.8429		no hit			0
Chr2	5203303	5203304	hy5-1_peak_718	11.0763		no hit			0
Chr2	5213093	5213094	hy5-1_peak_719	44.1684		no hit			0
Chr2	5578733	5578734	hy5-1_peak_720	4.73027		no hit			0
Chr2	5606476	5606477	hy5-1_peak_721	326.64		no hit			0
Chr2	6175190	6175191	hy5-1_peak_723	8.53912	AT2G14510	upstream	139		1
Chr2	6354185	6354186	hy5-1_peak_724	26.4682	AT2G14800	upstream	996		1
Chr2	6558385	6558386	hy5-1_peak_725	15.8767	AT2G15110	upstream	1218		1
Chr2	6667602	6667603	hy5-1_peak_726	83.7926	AT2G15320	inside			1
Chr2	6711824	6711825	hy5-1_peak_727	124.944	AT2G15390	upstream	669	listed	1
Chr2	6711824	6711825	hy5-1_peak_727	124.944	AT2G15400	upstream	1111	listed	1
Chr2	6836535	6836536	hy5-1_peak_728	42.054	AT2G15695	upstream	102	listed	1
Chr2	6946751	6946752	hy5-1_peak_729	7.42165	AT2G15950	downstream	91		1
Chr2	6946751	6946752	hy5-1_peak_729	7.42165	AT2G15960	upstream	557	listed	1
Chr2	6950023	6950024	hy5-1_peak_730	58.249	AT2G15970	upstream	17	listed	1
Chr2	7044804	7044805	hy5-1_peak_731	352.6	AT2G16250	upstream	1872		1
Chr2	7065612	7065613	hy5-1_peak_732	39.9895		no hit			0
Chr2	7191115	7191116	hy5-1_peak_733	234.253	AT2G16586	inside			1
Chr2	7215677	7215678	hy5-1_peak_734	18.255	AT2G16650	downstream	141		1
Chr2	7215677	7215678	hy5-1_peak_734	18.255	AT2G16640	upstream	125		1
Chr2	7230242	7230243	hy5-1_peak_735	15.5582	AT2G16676	downstream	103		1
Chr2	7274341	7274342	hy5-1_peak_736	27.0176	AT2G16760	upstream	1358		1
Chr2	7274341	7274342	hy5-1_peak_736	27.0176	AT2G16750	inside			1
Chr2	7316956	7316957	hy5-1_peak_737	8.38184	AT2G16890	inside		listed	1
Chr2	7604122	7604123	hy5-1_peak_738	10.1785		no hit			0
Chr2	7689523	7689524	hy5-1_peak_739	295.561	AT2G17700	upstream	88	listed	1
Chr2	7757963	7757964	hy5-1_peak_740	16.6668	AT2G17840	upstream	112	listed	1
Chr2	7757963	7757964	hy5-1_peak_740	16.6668	AT2G17845	upstream	882	listed	1
Chr2	7765313	7765314	hy5-1_peak_741	294.448	AT2G17870	upstream	84		1
Chr2	7812953	7812954	hy5-1_peak_742	13.8477	AT2G17960	inside			1
Chr2	7828852	7828853	hy5-1_peak_743	147.317	AT2G17990	downstream	99		1
Chr2	7828852	7828853	hy5-1_peak_743	147.317	AT2G18000	upstream	182		1
Chr2	7845918	7845919	hy5-1_peak_744	75.6514	AT2G18050	upstream	4	listed	1
Chr2	7935202	7935203	hy5-1_peak_745	148.974	AT2G18230	upstream	874		1
Chr2	7935202	7935203	hy5-1_peak_745	148.974	AT2G18240	upstream	82		1
Chr2	7969213	7969214	hy5-1_peak_746	96.1791	AT2G18330	downstream	109		1
Chr2	7969213	7969214	hy5-1_peak_746	96.1791	AT2G18340	upstream	106		1
Chr2	7978987	7978988	hy5-1_peak_747	9.58001	AT2G18370	upstream	1637		1
Chr2	7978987	7978988	hy5-1_peak_747	9.58001	AT2G18360	inside			1
Chr2	8010845	8010846	hy5-1_peak_748	25.5551	AT2G18480	inside			1
Chr2	8045124	8045125	hy5-1_peak_749	343.459	AT2G18540	upstream	117		1
Chr2	8063740	8063741	hy5-1_peak_750	7.51411	AT2G18570	inside			1
Chr2	8093903	8093904	hy5-1_peak_751	10.1785	AT2G18680	upstream	876		1
Chr2	8093903	8093904	hy5-1_peak_751	10.1785	AT2G18670	inside			1
Chr2	8107784	8107785	hy5-1_peak_752	421.249	AT2G18700	upstream	1258	listed	1
Chr2	8169421	8169422	hy5-1_peak_753	30.705	AT2G18876	upstream	124	listed	1
Chr2	8340210	8340211	hy5-1_peak_754	17.2134	AT2G19220	downstream	467		1
Chr2	8340210	8340211	hy5-1_peak_754	17.2134	AT2G19210	upstream	904		1
Chr2	8371179	8371180	hy5-1_peak_755	169.992	AT2G19310	upstream	774		1
Chr2	8371179	8371180	hy5-1_peak_755	169.992	AT2G19320	upstream	72		1
Chr2	8371179	8371180	hy5-1_peak_755	169.992	AT2G19330	upstream	1767		1
Chr2	8446960	8446961	hy5-1_peak_756	101.112	AT2G19500	inside			1
Chr2	8475413	8475414	hy5-1_peak_757	9.97332	AT2G19582	downstream	193	listed	1
Chr2	8475413	8475414	hy5-1_peak_757	9.97332	AT2G19580	upstream	261	listed	1
Chr2	8527177	8527178	hy5-1_peak_758	10.4979	AT2G19790	upstream	53	listed	1
Chr2	8544056	8544057	hy5-1_peak_759	309.816		no hit			0
Chr2	8588299	8588300	hy5-1_peak_760	31.8499	AT2G19893	upstream	1653		1
Chr2	8588299	8588300	hy5-1_peak_760	31.8499	AT2G19890	inside			1
Chr2	8668471	8668472	hy5-1_peak_761	144.318		no hit			0
Chr2	8736642	8736643	hy5-1_peak_763	417.059	AT2G20250	upstream	66		1
Chr2	8736642	8736643	hy5-1_peak_763	417.059	AT2G20260	upstream	91	listed	1
Chr2	8791876	8791877	hy5-1_peak_764	36.1381	AT2G20370	upstream	109		1
Chr2	8913649	8913650	hy5-1_peak_765	21.471	AT2G20670	upstream	116	listed	1
Chr2	8945247	8945248	hy5-1_peak_766	22.4751	AT2G20760	upstream	4		1
Chr2	8945247	8945248	hy5-1_peak_766	22.4751	AT2G20770	upstream	70		1
Chr2	8967522	8967523	hy5-1_peak_767	7.13906	AT2G20825	upstream	656		1
Chr2	9026660	9026661	hy5-1_peak_768	163.985	AT2G21030	upstream	1083		1
Chr2	9026660	9026661	hy5-1_peak_768	163.985	AT2G21045	upstream	1191		1
Chr2	9026660	9026661	hy5-1_peak_768	163.985	AT2G21040	inside			1
Chr2	9120082	9120083	hy5-1_peak_769	8.63434	AT2G21300	upstream	137		1
Chr2	9171544	9171545	hy5-1_peak_770	193.192	AT2G21430	downstream	340		1
Chr2	9171544	9171545	hy5-1_peak_770	193.192	AT2G21420	inside			1
Chr2	9207210	9207211	hy5-1_peak_771	107.499	AT2G21500	downstream	338		1
Chr2	9207210	9207211	hy5-1_peak_771	107.499	AT2G21480	upstream	1843		1
Chr2	9207210	9207211	hy5-1_peak_771	107.499	AT2G21490	upstream	86		1
Chr2	9213157	9213158	hy5-1_peak_772	84.7329	AT2G21510	upstream	100	listed	1
Chr2	9233375	9233376	hy5-1_peak_773	11.9042	AT2G21560	upstream	1868		1
Chr2	9273760	9273761	hy5-1_peak_774	15.9339	AT2G21710	downstream	343		1
Chr2	9273760	9273761	hy5-1_peak_774	15.9339	AT2G21720	inside			1
Chr2	9303350	9303351	hy5-1_peak_775	32.0819	AT2G21820	upstream	104		1
Chr2	9303350	9303351	hy5-1_peak_775	32.0819	AT2G21830	upstream	362		1
Chr2	9357993	9357994	hy5-1_peak_776	310.814	AT2G21970	upstream	78	listed	1
Chr2	9369445	9369446	hy5-1_peak_777	426.854	AT2G22010	inside		listed	1
Chr2	9427884	9427885	hy5-1_peak_778	11.0933	AT2G22170	upstream	68	listed	1
Chr2	9427884	9427885	hy5-1_peak_778	11.0933	AT2G22180	upstream	858	listed	1
Chr2	9436528	9436529	hy5-1_peak_779	5.31218	AT2G22190	inside			1
Chr2	9454339	9454340	hy5-1_peak_780	19.726	AT2G22240	upstream	246	listed	1
Chr2	9454339	9454340	hy5-1_peak_780	19.726	AT2G22241	inside		listed	1
Chr2	9530546	9530547	hy5-1_peak_781	50.7263	AT2G22450	upstream	0		1
Chr2	9530546	9530547	hy5-1_peak_781	50.7263	AT2G22450	inside			2
Chr2	9539159	9539160	hy5-1_peak_782	11.1195	AT2G22470	upstream	281	listed	1
Chr2	9563937	9563938	hy5-1_peak_783	42.4791	AT2G22500	inside		listed	1
Chr2	9647229	9647230	hy5-1_peak_784	285.518	AT2G22680	inside		listed	1
Chr2	9677631	9677632	hy5-1_peak_785	6.4127	AT2G22760	upstream	248		1
Chr2	9696833	9696834	hy5-1_peak_786	14.5472	AT2G22795	downstream	399	listed	1
Chr2	9696833	9696834	hy5-1_peak_786	14.5472	AT2G22790	inside		listed	1
Chr2	9817137	9817138	hy5-1_peak_787	52.9415		no hit			0
Chr2	9841990	9841991	hy5-1_peak_788	13.5006	AT2G23120	upstream	52		1
Chr2	9841990	9841991	hy5-1_peak_788	13.5006	AT2G23118	inside			1
Chr2	9866650	9866651	hy5-1_peak_789	17.6971	AT2G23170	upstream	89		1
Chr2	9866650	9866651	hy5-1_peak_789	17.6971	AT2G23171	inside			1
Chr2	9896445	9896446	hy5-1_peak_790	55.7009	AT2G23240	upstream	121		1
Chr2	9955292	9955293	hy5-1_peak_791	8.55564	AT2G23370	upstream	202		1
Chr2	9955292	9955293	hy5-1_peak_791	8.55564	AT2G23380	upstream	260		1
Chr2	9963630	9963631	hy5-1_peak_792	18.6006	AT2G23400	downstream	347		1
Chr2	9963630	9963631	hy5-1_peak_792	18.6006	AT2G23390	upstream	8		1
Chr2	10036041	10036042	hy5-1_peak_794	134.545	AT2G23580	upstream	1715		1
Chr2	10036041	10036042	hy5-1_peak_794	134.545	AT2G23590	upstream	42		1
Chr2	10057414	10057415	hy5-1_peak_795	120.123	AT2G23640	upstream	139	listed	1
Chr2	10108075	10108076	hy5-1_peak_797	408.722	AT2G23760	inside		listed	1
Chr2	10127616	10127617	hy5-1_peak_799	17.5516	AT2G23790	upstream	96	listed	1
Chr2	10170604	10170605	hy5-1_peak_800	234.503	AT2G23890	inside			1
Chr2	10244641	10244642	hy5-1_peak_801	39.3129	AT2G24100	upstream	244		1
Chr2	10267458	10267459	hy5-1_peak_802	32.1786	AT2G24150	upstream	54	listed	1
Chr2	10319816	10319817	hy5-1_peak_803	76.6256	AT2G24260	inside			1
Chr2	10324908	10324909	hy5-1_peak_804	40.9204		no hit			0
Chr2	10359638	10359639	hy5-1_peak_805	14.2092	AT2G24340	upstream	93		1
Chr2	10359638	10359639	hy5-1_peak_805	14.2092	AT2G24350	upstream	1487		1
Chr2	10390978	10390979	hy5-1_peak_806	190.938	AT2G24440	upstream	110	listed	1
Chr2	10445854	10445855	hy5-1_peak_808	13.9664	AT2G24580	inside			1
Chr2	10469326	10469327	hy5-1_peak_809	155.663	AT2G24625	downstream	41		1
Chr2	10561463	10561464	hy5-1_peak_810	13.3521	AT2G24765	upstream	1262		1
Chr2	10567306	10567307	hy5-1_peak_811	61.2099	AT2G24780	upstream	1361		1
Chr2	10567306	10567307	hy5-1_peak_811	61.2099	AT2G24790	inside		listed	1
Chr2	10657308	10657309	hy5-1_peak_812	25.2983	AT2G25050	inside			1
Chr2	10672494	10672495	hy5-1_peak_813	287.975	AT2G25090	inside		listed	1
Chr2	10684049	10684050	hy5-1_peak_814	5.18399	AT2G25110	upstream	85		1
Chr2	10779122	10779123	hy5-1_peak_815	134.696	AT2G25310	inside			1
Chr2	10822306	10822307	hy5-1_peak_816	63.2217	AT2G25430	upstream	63	listed	1
Chr2	10863211	10863212	hy5-1_peak_817	55.1705	AT2G25530	inside		listed	1
Chr2	10872467	10872468	hy5-1_peak_818	8.9404	AT2G25540	upstream	391		1
Chr2	10906132	10906133	hy5-1_peak_819	12.1205	AT2G25620	upstream	888		1
Chr2	10906132	10906133	hy5-1_peak_819	12.1205	AT2G25625	upstream	295	listed	1
Chr2	10991618	10991619	hy5-1_peak_820	32.9713	AT2G25770	upstream	1189		1
Chr2	11042792	11042793	hy5-1_peak_821	314.627	AT2G25900	inside		listed	1
Chr2	11065951	11065952	hy5-1_peak_822	343.458	AT2G25940	inside		listed	1
Chr2	11208488	11208489	hy5-1_peak_823	61.9558	AT2G26330	inside			1
Chr2	11233466	11233467	hy5-1_peak_824	105.447	AT2G26400	upstream	172		1
Chr2	11280559	11280560	hy5-1_peak_825	10.7187	AT2G26520	inside			1
Chr2	11298082	11298083	hy5-1_peak_826	250.534	AT2G26570	upstream	1061	listed	1
Chr2	11620939	11620940	hy5-1_peak_827	56.4013	AT2G27190	downstream	282	listed	1
Chr2	11620939	11620940	hy5-1_peak_827	56.4013	AT2G27180	inside		listed	1
Chr2	11647674	11647675	hy5-1_peak_828	119.31	AT2G27229	upstream	1479		1
Chr2	11682106	11682107	hy5-1_peak_829	136.541	AT2G27300	upstream	152	listed	1
Chr2	11696685	11696686	hy5-1_peak_830	11.2884	AT2G27330	upstream	56		1
Chr2	11696685	11696686	hy5-1_peak_830	11.2884	AT2G27340	upstream	51		1
Chr2	11704325	11704326	hy5-1_peak_831	16.0768	AT2G27350	upstream	54		1
Chr2	11704325	11704326	hy5-1_peak_831	16.0768	AT2G27360	upstream	1872		1
Chr2	11779906	11779907	hy5-1_peak_833	27.4278	AT2G27590	upstream	56		1
Chr2	11779906	11779907	hy5-1_peak_833	27.4278	AT2G27600	upstream	1131		1
Chr2	11871900	11871901	hy5-1_peak_834	9.70809	AT2G27880	inside			1
Chr2	11961599	11961600	hy5-1_peak_835	91.7179	AT2G28080	inside		listed	1
Chr2	11978094	11978095	hy5-1_peak_836	67.1047	AT2G28105	downstream	182		1
Chr2	11978094	11978095	hy5-1_peak_836	67.1047	AT2G28110	inside		listed	1
Chr2	12023365	12023366	hy5-1_peak_837	167.169	AT2G28200	upstream	783	listed	1
Chr2	12101025	12101026	hy5-1_peak_838	11.8763	AT2G28330	upstream	269	listed	1
Chr2	12108292	12108293	hy5-1_peak_839	447.489		no hit			0
Chr2	12289567	12289568	hy5-1_peak_841	114.512	AT2G28650	inside		listed	1
Chr2	12296778	12296779	hy5-1_peak_842	36.828	AT2G28660	inside		listed	1
Chr2	12326808	12326809	hy5-1_peak_843	12.1174	AT2G28720	upstream	169	listed	1
Chr2	12326808	12326809	hy5-1_peak_843	12.1174	AT2G28725	upstream	1796	listed	1
Chr2	12329168	12329169	hy5-1_peak_844	22.3185	AT2G28725	downstream	226	listed	2
Chr2	12329168	12329169	hy5-1_peak_844	22.3185	AT2G28730	downstream	95	listed	1
Chr2	12329168	12329169	hy5-1_peak_844	22.3185	AT2G28740	downstream	319	listed	1
Chr2	12343085	12343086	hy5-1_peak_845	216.703	AT2G28780	inside		listed	1
Chr2	12362142	12362143	hy5-1_peak_846	19.5346	AT2G28810	upstream	1283		1
Chr2	12388922	12388923	hy5-1_peak_847	16.1697	AT2G28860	inside			1
Chr2	12418397	12418398	hy5-1_peak_848	182.064	AT2G28910	upstream	1013		1
Chr2	12418397	12418398	hy5-1_peak_848	182.064	AT2G28920	inside		listed	1
Chr2	12428804	12428805	hy5-1_peak_849	141.579	AT2G28940	upstream	75	listed	1
Chr2	12454446	12454447	hy5-1_peak_850	7.18903	AT2G28990	upstream	608		1
Chr2	12618941	12618942	hy5-1_peak_851	138.86	AT2G29420	upstream	43	listed	1
Chr2	12618941	12618942	hy5-1_peak_851	138.86	AT2G29430	upstream	612	listed	1
Chr2	12633468	12633469	hy5-1_peak_852	6.79607	AT2G29490	upstream	996	listed	1
Chr2	12633468	12633469	hy5-1_peak_852	6.79607	AT2G29510	upstream	1045	listed	1
Chr2	12633468	12633469	hy5-1_peak_852	6.79607	AT2G29500	inside		listed	1
Chr2	12642432	12642433	hy5-1_peak_853	55.1538	AT2G29530	upstream	46	listed	1
Chr2	12642432	12642433	hy5-1_peak_853	55.1538	AT2G29540	upstream	88	listed	1
Chr2	12666898	12666899	hy5-1_peak_854	13.5006	AT2G29620	upstream	1096		1
Chr2	12666898	12666899	hy5-1_peak_854	13.5006	AT2G29630	upstream	36	listed	1
Chr2	12666898	12666899	hy5-1_peak_854	13.5006	AT2G29628	inside			1
Chr2	12680225	12680226	hy5-1_peak_855	28.5861	AT2G29660	inside		listed	1
Chr2	12707911	12707912	hy5-1_peak_856	86.941	AT2G29750	upstream	1815	listed	1
Chr2	12707911	12707912	hy5-1_peak_856	86.941	AT2G29740	inside		listed	1
Chr2	12712937	12712938	hy5-1_peak_857	7.0958	AT2G29760	inside			1
Chr2	12767672	12767673	hy5-1_peak_858	9.39091	AT2G29950	inside			1
Chr2	12822076	12822077	hy5-1_peak_859	8.35934	AT2G30040	inside		listed	1
Chr2	12885593	12885594	hy5-1_peak_860	12.2306	AT2G30200	inside		listed	1
Chr2	12897244	12897245	hy5-1_peak_861	9.68009	AT2G30230	inside			1
Chr2	12939263	12939264	hy5-1_peak_862	49.0403	AT2G30360	upstream	430		1
Chr2	12939263	12939264	hy5-1_peak_862	49.0403	AT2G30362	inside			1
Chr2	12973614	12973615	hy5-1_peak_863	18.5698	AT2G30440	inside			1
Chr2	13136448	13136449	hy5-1_peak_864	23.1984	AT2G30840	inside			1
Chr2	13172266	13172267	hy5-1_peak_865	10.0527	AT2G30942	downstream	246		1
Chr2	13172266	13172267	hy5-1_peak_865	10.0527	AT2G30945	upstream	94		1
Chr2	13221366	13221367	hy5-1_peak_866	26.4415	AT2G31070	inside		listed	1
Chr2	13307781	13307782	hy5-1_peak_867	61.4599	AT2G31230	upstream	307	listed	1
Chr2	13648214	13648215	hy5-1_peak_868	8.16235	AT2G32100	inside		listed	1
Chr2	13726757	13726758	hy5-1_peak_869	27.922	AT2G32310	downstream	384		1
Chr2	13726757	13726758	hy5-1_peak_869	27.922	AT2G32315	upstream	58		1
Chr2	13726757	13726758	hy5-1_peak_869	27.922	AT2G32320	upstream	61	listed	1
Chr2	13765522	13765523	hy5-1_peak_870	15.1281	AT2G32415	upstream	67		1
Chr2	13780808	13780809	hy5-1_peak_871	3.76201	AT2G32450	inside			1
Chr2	13800417	13800418	hy5-1_peak_872	137.24	AT2G32510	upstream	479	listed	1
Chr2	14021731	14021732	hy5-1_peak_873	51.9108	AT2G33051	downstream	305	listed	1
Chr2	14021731	14021732	hy5-1_peak_873	51.9108	AT2G33040	upstream	549		1
Chr2	14021731	14021732	hy5-1_peak_873	51.9108	AT2G33050	upstream	138	listed	1
Chr2	14031507	14031508	hy5-1_peak_874	173.225	AT2G33070	upstream	344		1
Chr2	14031507	14031508	hy5-1_peak_874	173.225	AT2G33080	upstream	507		1
Chr2	14066387	14066388	hy5-1_peak_875	17.6971	AT2G33180	upstream	75	listed	1
Chr2	14066387	14066388	hy5-1_peak_875	17.6971	AT2G33190	upstream	1584	listed	1
Chr2	14146536	14146537	hy5-1_peak_876	41.1412	AT2G33370	upstream	1816		1
Chr2	14146536	14146537	hy5-1_peak_876	41.1412	AT2G33380	upstream	66	listed	1
Chr2	14196669	14196670	hy5-1_peak_877	17.6971	AT2G33520	upstream	82	listed	1
Chr2	14253323	14253324	hy5-1_peak_878	13.7307	AT2G33700	upstream	100	listed	1
Chr2	14288833	14288834	hy5-1_peak_879	54.8754	AT2G33775	inside			1
Chr2	14524448	14524449	hy5-1_peak_880	98.6702	AT2G34420	upstream	881		1
Chr2	14524448	14524449	hy5-1_peak_880	98.6702	AT2G34430	upstream	307	listed	1
Chr2	14536454	14536455	hy5-1_peak_881	201.287	AT2G34490	inside		listed	1
Chr2	14645665	14645666	hy5-1_peak_883	14.2092	AT2G34710	upstream	1393	listed	1
Chr2	14696196	14696197	hy5-1_peak_884	5.6987	AT2G34830	inside		listed	1
Chr2	14697016	14697017	hy5-1_peak_885	11.3753	AT2G34830	upstream	639	listed	2
Chr2	14750658	14750659	hy5-1_peak_886	12.5883	AT2G34990	inside		listed	1
Chr2	14752408	14752409	hy5-1_peak_887	33.3365	AT2G34990	upstream	1241	listed	2
Chr2	14752408	14752409	hy5-1_peak_887	33.3365	AT2G35010	upstream	1862	listed	1
Chr2	14752408	14752409	hy5-1_peak_887	33.3365	AT2G35000	inside		listed	1
Chr2	14795289	14795290	hy5-1_peak_888	56.7674	AT2G35110	downstream	425		1
Chr2	14795289	14795290	hy5-1_peak_888	56.7674	AT2G35100	inside			1
Chr2	14945589	14945590	hy5-1_peak_890	7.05225	AT2G35600	upstream	233		1
Chr2	14945589	14945590	hy5-1_peak_890	7.05225	AT2G35605	upstream	473	listed	1
Chr2	15060335	15060336	hy5-1_peak_891	38.1022	AT2G35859	inside			1
Chr2	15060335	15060336	hy5-1_peak_891	38.1022	AT2G35860	inside		listed	1
Chr2	15066347	15066348	hy5-1_peak_892	33.8443	AT2G35880	upstream	478	listed	1
Chr2	15073328	15073329	hy5-1_peak_893	19.8197	AT2G35900	upstream	1676		1
Chr2	15073328	15073329	hy5-1_peak_893	19.8197	AT2G35910	inside			1
Chr2	15127836	15127837	hy5-1_peak_894	447.33	AT2G36026	downstream	21		1
Chr2	15127836	15127837	hy5-1_peak_894	447.33	AT2G36030	upstream	66	listed	1
Chr2	15154029	15154030	hy5-1_peak_895	45.3483		no hit			0
Chr2	15168490	15168491	hy5-1_peak_896	227.635	AT2G36140	upstream	371	listed	1
Chr2	15168490	15168491	hy5-1_peak_896	227.635	AT2G36145	upstream	50	listed	1
Chr2	15168490	15168491	hy5-1_peak_896	227.635	AT2G36150	upstream	1087	listed	1
Chr2	15168490	15168491	hy5-1_peak_896	227.635	AT2G36160	upstream	1327	listed	1
Chr2	15168490	15168491	hy5-1_peak_896	227.635	AT2G36130	inside		listed	1
Chr2	15185489	15185490	hy5-1_peak_897	10.7187	AT2G36200	upstream	176	listed	1
Chr2	15193481	15193482	hy5-1_peak_898	48.6485	AT2G36230	downstream	212	listed	1
Chr2	15193481	15193482	hy5-1_peak_898	48.6485	AT2G36220	inside		listed	1
Chr2	15262283	15262284	hy5-1_peak_899	8.97927	AT2G36390	upstream	1953	listed	1
Chr2	15262283	15262284	hy5-1_peak_899	8.97927	AT2G36380	inside		listed	1
Chr2	15286086	15286087	hy5-1_peak_900	17.8984	AT2G36420	upstream	411	listed	1
Chr2	15291178	15291179	hy5-1_peak_901	96.8743	AT2G36440	upstream	1469		1
Chr2	15291178	15291179	hy5-1_peak_901	96.8743	AT2G36430	inside			1
Chr2	15299937	15299938	hy5-1_peak_902	127.092	AT2G36460	upstream	1424		1
Chr2	15299937	15299938	hy5-1_peak_902	127.092	AT2G36470	inside		listed	1
Chr2	15337315	15337316	hy5-1_peak_903	20.0575	AT2G36580	upstream	1806	listed	1
Chr2	15337315	15337316	hy5-1_peak_903	20.0575	AT2G36570	inside			1
Chr2	15338565	15338566	hy5-1_peak_904	96.2587	AT2G36571	upstream	437		1
Chr2	15338565	15338566	hy5-1_peak_904	96.2587	AT2G36580	upstream	556	listed	2
Chr2	15358721	15358722	hy5-1_peak_905	138.514	AT2G36640	upstream	110		1
Chr2	15358721	15358722	hy5-1_peak_905	138.514	AT2G36650	upstream	1193		1
Chr2	15425101	15425102	hy5-1_peak_906	16.2023	AT2G36810	downstream	377		1
Chr2	15425101	15425102	hy5-1_peak_906	16.2023	AT2G36800	upstream	86		1
Chr2	15564720	15564721	hy5-1_peak_907	53.9016		no hit			0
Chr2	15616392	15616393	hy5-1_peak_908	30.843	AT2G37170	upstream	1536	listed	1
Chr2	15616392	15616393	hy5-1_peak_908	30.843	AT2G37180	upstream	1315	listed	1
Chr2	15641867	15641868	hy5-1_peak_909	9.58001	AT2G37240	upstream	105	listed	1
Chr2	15641867	15641868	hy5-1_peak_909	9.58001	AT2G37250	upstream	38	listed	1
Chr2	15661913	15661914	hy5-1_peak_910	20.7371	AT2G37290	upstream	229		1
Chr2	15736681	15736682	hy5-1_peak_911	47.4878	AT2G37470	upstream	82	listed	1
Chr2	15736681	15736682	hy5-1_peak_911	47.4878	AT2G37478	upstream	1160	listed	1
Chr2	15736681	15736682	hy5-1_peak_911	47.4878	AT2G37480	upstream	1160	listed	1
Chr2	15737746	15737747	hy5-1_peak_912	14.0499	AT2G37470	downstream	379	listed	2
Chr2	15737746	15737747	hy5-1_peak_912	14.0499	AT2G37478	upstream	95	listed	2
Chr2	15737746	15737747	hy5-1_peak_912	14.0499	AT2G37480	upstream	95	listed	2
Chr2	15797049	15797050	hy5-1_peak_914	163.566	AT2G37670	downstream	334	listed	1
Chr2	15797049	15797050	hy5-1_peak_914	163.566	AT2G37660	inside		listed	1
Chr2	15859177	15859178	hy5-1_peak_915	51.8949	AT2G37860	downstream	258		1
Chr2	15859177	15859178	hy5-1_peak_915	51.8949	AT2G37870	upstream	61		1
Chr2	15859177	15859178	hy5-1_peak_915	51.8949	AT2G37880	upstream	1455		1
Chr2	15883602	15883603	hy5-1_peak_916	10.649	AT2G37950	inside			1
Chr2	15921416	15921417	hy5-1_peak_917	7.22729	AT2G38040	downstream	247		1
Chr2	15921416	15921417	hy5-1_peak_917	7.22729	AT2G38050	inside		listed	1
Chr2	15945897	15945898	hy5-1_peak_918	17.8433	AT2G38090	inside		listed	1
Chr2	16028839	16028840	hy5-1_peak_919	7.50032		no hit			0
Chr2	16050629	16050630	hy5-1_peak_920	171.38	AT2G38310	inside			1
Chr2	16106884	16106885	hy5-1_peak_921	7.59408	AT2G38470	upstream	1476		1
Chr2	16106884	16106885	hy5-1_peak_921	7.59408	AT2G38465	inside			1
Chr2	16113122	16113123	hy5-1_peak_922	12.0116	AT2G38490	downstream	368	listed	1
Chr2	16113122	16113123	hy5-1_peak_922	12.0116	AT2G38480	upstream	1326	listed	1
Chr2	16221738	16221739	hy5-1_peak_923	106.499	AT2G38810	upstream	811		1
Chr2	16221738	16221739	hy5-1_peak_923	106.499	AT2G38820	upstream	97	listed	1
Chr2	16234891	16234892	hy5-1_peak_924	334.84	AT2G38860	inside		listed	1
Chr2	16244604	16244605	hy5-1_peak_925	72.3077	AT2G38905	upstream	102		1
Chr2	16336309	16336310	hy5-1_peak_926	5.47291	AT2G39170	upstream	100		1
Chr2	16390636	16390637	hy5-1_peak_927	51.2892	AT2G39250	inside		listed	1
Chr2	16452492	16452493	hy5-1_peak_928	143.699	AT2G39390	upstream	615		1
Chr2	16452492	16452493	hy5-1_peak_928	143.699	AT2G39400	upstream	119	listed	1
Chr2	16458129	16458130	hy5-1_peak_929	21.0594	AT2G39415	downstream	477		1
Chr2	16458129	16458130	hy5-1_peak_929	21.0594	AT2G39410	inside			1
Chr2	16473963	16473964	hy5-1_peak_930	20.8103	AT2G39450	upstream	146		1
Chr2	16473963	16473964	hy5-1_peak_930	20.8103	AT2G39460	upstream	185		1
Chr2	16547734	16547735	hy5-1_peak_931	228.517		no hit			0
Chr2	16562935	16562936	hy5-1_peak_932	16.5388	AT2G39710	inside		listed	1
Chr2	16603360	16603361	hy5-1_peak_933	124.697	AT2G39800	upstream	42	listed	1
Chr2	16642584	16642585	hy5-1_peak_934	82.5455	AT2G39865	upstream	678		1
Chr2	16642584	16642585	hy5-1_peak_934	82.5455	AT2G39870	upstream	796	listed	1
Chr2	16689322	16689323	hy5-1_peak_935	73.4041	AT2G39980	inside		listed	1
Chr2	16706109	16706110	hy5-1_peak_936	20.6139	AT2G40008	upstream	1946		1
Chr2	16745067	16745068	hy5-1_peak_937	18.7672	AT2G40100	upstream	585	listed	1
Chr2	16745067	16745068	hy5-1_peak_937	18.7672	AT2G40095	inside			1
Chr2	16746404	16746405	hy5-1_peak_938	44.4033	AT2G40110	upstream	1535	listed	1
Chr2	16746404	16746405	hy5-1_peak_938	44.4033	AT2G40100	inside		listed	2
Chr2	16780407	16780408	hy5-1_peak_939	382.385	AT2G40170	upstream	150	listed	1
Chr2	16804185	16804186	hy5-1_peak_940	7.52458	AT2G40230	inside		listed	1
Chr2	16845416	16845417	hy5-1_peak_941	357.658	AT2G40330	inside		listed	1
Chr2	16850556	16850557	hy5-1_peak_942	25.3775	AT2G40340	upstream	70	listed	1
Chr2	16852865	16852866	hy5-1_peak_943	49.4686	AT2G40360	downstream	14		1
Chr2	16852865	16852866	hy5-1_peak_943	49.4686	AT2G40350	upstream	798		1
Chr2	16888279	16888280	hy5-1_peak_944	18.153	AT2G40435	inside			1
Chr2	16898444	16898445	hy5-1_peak_945	27.9956	AT2G40460	inside		listed	1
Chr2	16912776	16912777	hy5-1_peak_946	280.69	AT2G40480	downstream	185	listed	1
Chr2	16912776	16912777	hy5-1_peak_946	280.69	AT2G40490	upstream	68	listed	1
Chr2	16949083	16949084	hy5-1_peak_947	223.503	AT2G40600	upstream	523		1
Chr2	16949083	16949084	hy5-1_peak_947	223.503	AT2G40610	inside		listed	1
Chr2	17069390	17069391	hy5-1_peak_948	60.0942	AT2G40910	downstream	477		1
Chr2	17075792	17075793	hy5-1_peak_949	6.46271	AT2G40920	upstream	1629		1
Chr2	17075792	17075793	hy5-1_peak_949	6.46271	AT2G40925	inside			1
Chr2	17097984	17097985	hy5-1_peak_950	23.941	AT2G40970	inside		listed	1
Chr2	17116746	17116747	hy5-1_peak_951	32.9713	AT2G41010	upstream	1943		1
Chr2	17116746	17116747	hy5-1_peak_951	32.9713	AT2G41020	upstream	516	listed	1
Chr2	17143496	17143497	hy5-1_peak_952	22.3324	AT2G41120	upstream	1040		1
Chr2	17143496	17143497	hy5-1_peak_952	22.3324	AT2G41130	inside			1
Chr2	17159917	17159918	hy5-1_peak_953	176.361	AT2G41160	upstream	1038		1
Chr2	17159917	17159918	hy5-1_peak_953	176.361	AT2G41170	inside		listed	1
Chr2	17164493	17164494	hy5-1_peak_954	11.9042	AT2G41178	downstream	301		1
Chr2	17164493	17164494	hy5-1_peak_954	11.9042	AT2G41180	upstream	697		1
Chr2	17170458	17170459	hy5-1_peak_955	22.5647	AT2G41190	upstream	52		1
Chr2	17170458	17170459	hy5-1_peak_955	22.5647	AT2G41200	upstream	1166		1
Chr2	17199968	17199969	hy5-1_peak_957	13.9664	AT2G41240	upstream	649		1
Chr2	17225364	17225365	hy5-1_peak_958	129.995	AT2G41312	upstream	158	listed	1
Chr2	17225364	17225365	hy5-1_peak_958	129.995	AT2G41330	upstream	1583	listed	1
Chr2	17301621	17301622	hy5-1_peak_959	108.698	AT2G41490	upstream	73	listed	1
Chr2	17368572	17368573	hy5-1_peak_960	90.6495	AT2G41660	inside		listed	1
Chr2	17388603	17388604	hy5-1_peak_961	37.3611	AT2G41700	inside		listed	1
Chr2	17403247	17403248	hy5-1_peak_962	348.287	AT2G41720	downstream	355	listed	1
Chr2	17403247	17403248	hy5-1_peak_962	348.287	AT2G41710	upstream	198	listed	1
Chr2	17436265	17436266	hy5-1_peak_963	23.7895	AT2G41800	downstream	263	listed	1
Chr2	17436265	17436266	hy5-1_peak_963	23.7895	AT2G41790	upstream	92	listed	1
Chr2	17473053	17473054	hy5-1_peak_964	113.035	AT2G41870	upstream	118	listed	1
Chr2	17473053	17473054	hy5-1_peak_964	113.035	AT2G41880	upstream	1565	listed	1
Chr2	17512944	17512945	hy5-1_peak_965	4.4572	AT2G41950	upstream	134		1
Chr2	17512944	17512945	hy5-1_peak_965	4.4572	AT2G41945	inside			1
Chr2	17639513	17639514	hy5-1_peak_966	23.0744	AT2G42340	upstream	1787		1
Chr2	17639513	17639514	hy5-1_peak_966	23.0744	AT2G42360	upstream	1284	listed	1
Chr2	17639513	17639514	hy5-1_peak_966	23.0744	AT2G42350	inside		listed	1
Chr2	17641298	17641299	hy5-1_peak_967	10.9559	AT2G42365	downstream	485	listed	1
Chr2	17641298	17641299	hy5-1_peak_967	10.9559	AT2G42360	inside		listed	2
Chr2	17664982	17664983	hy5-1_peak_968	105.266	AT2G42430	inside			1
Chr2	17717026	17717027	hy5-1_peak_969	39.4982	AT2G42570	downstream	340	listed	1
Chr2	17717026	17717027	hy5-1_peak_969	39.4982	AT2G42560	upstream	115		1
Chr2	17718090	17718091	hy5-1_peak_970	12.412	AT2G42560	upstream	1179		2
Chr2	17718090	17718091	hy5-1_peak_970	12.412	AT2G42570	inside		listed	2
Chr2	17728949	17728950	hy5-1_peak_971	269.838	AT2G42580	inside			1
Chr2	17793255	17793256	hy5-1_peak_973	75.7699	AT2G42740	downstream	174		1
Chr2	17793255	17793256	hy5-1_peak_973	75.7699	AT2G42730	upstream	1674		1
Chr2	17793255	17793256	hy5-1_peak_973	75.7699	AT2G42750	upstream	51		1
Chr2	17796123	17796124	hy5-1_peak_974	15.8637	AT2G42750	downstream	444		2
Chr2	17796123	17796124	hy5-1_peak_974	15.8637	AT2G42760	inside			1
Chr2	17806070	17806071	hy5-1_peak_975	24.8246	AT2G42790	upstream	22	listed	1
Chr2	17845093	17845094	hy5-1_peak_976	23.8332	AT2G42880	upstream	714		1
Chr2	17862987	17862988	hy5-1_peak_977	5.78112	AT2G42930	upstream	1716		1
Chr2	17862987	17862988	hy5-1_peak_977	5.78112	AT2G42950	upstream	831		1
Chr2	17862987	17862988	hy5-1_peak_977	5.78112	AT2G42920	inside			1
Chr2	17862987	17862988	hy5-1_peak_977	5.78112	AT2G42940	inside			1
Chr2	17891022	17891023	hy5-1_peak_978	26.5236	AT2G43018	upstream	481	listed	1
Chr2	17891022	17891023	hy5-1_peak_978	26.5236	AT2G43020	upstream	480	listed	1
Chr2	17906838	17906839	hy5-1_peak_979	73.9482		no hit			0
Chr2	17910713	17910714	hy5-1_peak_980	13.1714	AT2G43070	downstream	174	listed	1
Chr2	17926515	17926516	hy5-1_peak_981	368.536	AT2G43120	upstream	748	listed	1
Chr2	17976006	17976007	hy5-1_peak_982	19.5895	AT2G43240	upstream	140		1
Chr2	17976006	17976007	hy5-1_peak_982	19.5895	AT2G43250	upstream	1221		1
Chr2	18021135	18021136	hy5-1_peak_983	5.8284	AT2G43390	upstream	275		1
Chr2	18021135	18021136	hy5-1_peak_983	5.8284	AT2G43400	upstream	44	listed	1
Chr2	18052940	18052941	hy5-1_peak_984	23.4907	AT2G43470	upstream	1723		1
Chr2	18052940	18052941	hy5-1_peak_984	23.4907	AT2G43480	upstream	61		1
Chr2	18081554	18081555	hy5-1_peak_985	130.123	AT2G43580	upstream	1527		1
Chr2	18081554	18081555	hy5-1_peak_985	130.123	AT2G43590	inside		listed	1
Chr2	18143527	18143528	hy5-1_peak_986	53.4491	AT2G43795	upstream	1159	listed	1
Chr2	18167470	18167471	hy5-1_peak_987	12.6983	AT2G43865	upstream	1593		1
Chr2	18167470	18167471	hy5-1_peak_987	12.6983	AT2G43871	upstream	1233	listed	1
Chr2	18167470	18167471	hy5-1_peak_987	12.6983	AT2G43870	inside		listed	1
Chr2	18175125	18175126	hy5-1_peak_988	33.7033	AT2G43890	upstream	1798	listed	1
Chr2	18303921	18303922	hy5-1_peak_989	371.831	AT2G44280	inside		listed	1
Chr2	18363707	18363708	hy5-1_peak_990	225.25	AT2G44490	upstream	1048	listed	1
Chr2	18372755	18372756	hy5-1_peak_991	105.372	AT2G44500	upstream	1536	listed	1
Chr2	18400969	18400970	hy5-1_peak_992	18.6121	AT2G44578	inside			1
Chr2	18423196	18423197	hy5-1_peak_993	99.3752	AT2G44660	upstream	358	listed	1
Chr2	18423196	18423197	hy5-1_peak_993	99.3752	AT2G44670	upstream	1983	listed	1
Chr2	18479400	18479401	hy5-1_peak_994	243.496	AT2G44810	inside		listed	1
Chr2	18536148	18536149	hy5-1_peak_995	30.5197	AT2G44940	upstream	1108	listed	1
Chr2	18557094	18557095	hy5-1_peak_996	24.0946	AT2G44980	upstream	426	listed	1
Chr2	18557094	18557095	hy5-1_peak_996	24.0946	AT2G44990	upstream	1843	listed	1
Chr2	18563922	18563923	hy5-1_peak_997	94.1841	AT2G44995	downstream	245		1
Chr2	18563922	18563923	hy5-1_peak_997	94.1841	AT2G45000	upstream	188	listed	1
Chr2	18578034	18578035	hy5-1_peak_998	206.156	AT2G45040	inside		listed	1
Chr2	18583928	18583929	hy5-1_peak_999	56.5617	AT2G45060	downstream	423		1
Chr2	18583928	18583929	hy5-1_peak_999	56.5617	AT2G45050	inside			1
Chr2	18624200	18624201	hy5-1_peak_1000	73.2107	AT2G45170	upstream	63		1
Chr2	18672267	18672268	hy5-1_peak_1001	10.9661	AT2G45290	upstream	414		1
Chr2	18672267	18672268	hy5-1_peak_1001	10.9661	AT2G45280	inside			1
Chr2	18699284	18699285	hy5-1_peak_1002	8.4452	AT2G45380	downstream	143	listed	1
Chr2	18699284	18699285	hy5-1_peak_1002	8.4452	AT2G45360	inside		listed	1
Chr2	18717459	18717460	hy5-1_peak_1003	9.21654	AT2G45420	upstream	888	listed	1
Chr2	18728220	18728221	hy5-1_peak_1004	27.7498	AT2G45434	upstream	1512	listed	1
Chr2	18728220	18728221	hy5-1_peak_1004	27.7498	AT2G45430	inside		listed	1
Chr2	18790503	18790504	hy5-1_peak_1005	48.732	AT2G45610	upstream	959	listed	1
Chr2	18790503	18790504	hy5-1_peak_1005	48.732	AT2G45600	inside		listed	1
Chr2	18796022	18796023	hy5-1_peak_1006	16.9775	AT2G45620	downstream	119	listed	1
Chr2	18796022	18796023	hy5-1_peak_1006	16.9775	AT2G45630	inside		listed	1
Chr2	18833168	18833169	hy5-1_peak_1007	59.3028	AT2G45720	upstream	195	listed	1
Chr2	18845160	18845161	hy5-1_peak_1008	110.858	AT2G45750	inside		listed	1
Chr2	18864863	18864864	hy5-1_peak_1009	92.2761	AT2G45820	upstream	173	listed	1
Chr2	18864863	18864864	hy5-1_peak_1009	92.2761	AT2G45830	upstream	1197	listed	1
Chr2	18893933	18893934	hy5-1_peak_1010	135.845	AT2G45910	upstream	140	listed	1
Chr2	18913234	18913235	hy5-1_peak_1011	202.558	AT2G45970	inside		listed	1
Chr2	18978051	18978052	hy5-1_peak_1012	154.177	AT2G46200	upstream	1181		1
Chr2	18978051	18978052	hy5-1_peak_1012	154.177	AT2G46220	upstream	1419		1
Chr2	18978051	18978052	hy5-1_peak_1012	154.177	AT2G46210	inside			1
Chr2	18981456	18981457	hy5-1_peak_1013	17.1942	AT2G46225	upstream	454		1
Chr2	18999151	18999152	hy5-1_peak_1014	115.085	AT2G46270	upstream	1039	listed	1
Chr2	19000167	19000168	hy5-1_peak_1015	141.489	AT2G46270	upstream	23	listed	2
Chr2	19007931	19007932	hy5-1_peak_1016	140.82	AT2G46290	upstream	53		1
Chr2	19007931	19007932	hy5-1_peak_1016	140.82	AT2G46300	upstream	359		1
Chr2	19052063	19052064	hy5-1_peak_1017	11.7982	AT2G46410	upstream	1723	listed	1
Chr2	19052063	19052064	hy5-1_peak_1017	11.7982	AT2G46420	upstream	1622	listed	1
Chr2	19057342	19057343	hy5-1_peak_1018	13.9664	AT2G46420	downstream	247		2
Chr2	19057342	19057343	hy5-1_peak_1018	13.9664	AT2G46430	upstream	787		1
Chr2	19095898	19095899	hy5-1_peak_1019	31.577	AT2G46520	upstream	869	listed	1
Chr2	19109485	19109486	hy5-1_peak_1020	13.5006	AT2G46535	upstream	134	listed	1
Chr2	19145711	19145712	hy5-1_peak_1021	172.196	AT2G46630	inside		listed	1
Chr2	19221211	19221212	hy5-1_peak_1022	313.11	AT2G46770	inside			1
Chr2	19232469	19232470	hy5-1_peak_1023	88.6732	AT2G46790	upstream	179	listed	1
Chr2	19232469	19232470	hy5-1_peak_1023	88.6732	AT2G46787	inside		listed	1
Chr2	19243567	19243568	hy5-1_peak_1024	6.4821	AT2G46820	inside		listed	1
Chr2	19265933	19265934	hy5-1_peak_1025	23.6342	AT2G46880	inside			1
Chr2	19306563	19306564	hy5-1_peak_1026	36.4176	AT2G46990	upstream	1291		1
Chr2	19310107	19310108	hy5-1_peak_1027	12.0218	AT2G46995	upstream	524		1
Chr2	19310107	19310108	hy5-1_peak_1027	12.0218	AT2G47000	inside		listed	1
Chr2	19352729	19352730	hy5-1_peak_1028	9.86407	AT2G47140	upstream	642		1
Chr2	19352729	19352730	hy5-1_peak_1028	9.86407	AT2G47150	inside			1
Chr2	19374532	19374533	hy5-1_peak_1029	96.4817	AT2G47190	upstream	1669		1
Chr2	19386773	19386774	hy5-1_peak_1030	345.743	AT2G47230	upstream	246		1
Chr2	19386773	19386774	hy5-1_peak_1030	345.743	AT2G47220	inside			1
Chr2	19408700	19408701	hy5-1_peak_1031	191.93	AT2G47260	upstream	1617	listed	1
Chr2	19468156	19468157	hy5-1_peak_1032	329.817	AT2G47440	upstream	1562	listed	1
Chr2	19476086	19476087	hy5-1_peak_1033	8.75037	AT2G47460	upstream	250	listed	1
Chr2	19481362	19481363	hy5-1_peak_1034	74.6772	AT2G47470	upstream	57	listed	1
Chr2	19511849	19511850	hy5-1_peak_1035	249.264	AT2G47550	downstream	58		1
Chr2	19511849	19511850	hy5-1_peak_1035	249.264	AT2G47560	inside			1
Chr2	19536677	19536678	hy5-1_peak_1036	12.2245	AT2G47640	upstream	500		1
Chr2	19536677	19536678	hy5-1_peak_1036	12.2245	AT2G47630	inside			1
Chr2	19544267	19544268	hy5-1_peak_1037	116.925	AT2G47670	inside			1
Chr2	19556140	19556141	hy5-1_peak_1038	18.2425	AT2G47700	upstream	1557		1
Chr2	19556140	19556141	hy5-1_peak_1038	18.2425	AT2G47710	upstream	76		1
Chr2	19556140	19556141	hy5-1_peak_1038	18.2425	AT2G47720	upstream	483		1
Chr2	19556140	19556141	hy5-1_peak_1038	18.2425	AT2G47730	upstream	185	listed	1
Chr2	19560639	19560640	hy5-1_peak_1039	43.2556	AT2G47740	upstream	715	listed	1
Chr2	19560639	19560640	hy5-1_peak_1039	43.2556	AT2G47750	inside		listed	1
Chr2	19568525	19568526	hy5-1_peak_1040	173.401	AT2G47760	upstream	261		1
Chr2	19568525	19568526	hy5-1_peak_1040	173.401	AT2G47780	upstream	1523	listed	1
Chr2	19568525	19568526	hy5-1_peak_1040	173.401	AT2G47770	inside		listed	1
Chr2	19583720	19583721	hy5-1_peak_1041	49.1501	AT2G47810	upstream	103		1
Chr2	19698137	19698138	hy5-1_peak_1042	194.168	AT2G48160	upstream	1317		1
Chr3	18879	18880	hy5-1_peak_1043	99.0391	AT3G01060	upstream	40	listed	1
Chr3	18879	18880	hy5-1_peak_1043	99.0391	AT3G01070	upstream	712	listed	1
Chr3	164346	164347	hy5-1_peak_1045	13.7307	AT3G01420	upstream	1510		1
Chr3	204463	204464	hy5-1_peak_1046	22.2145	AT3G01513	upstream	1724	listed	1
Chr3	209107	209108	hy5-1_peak_1047	14.8145	AT3G01520	inside		listed	1
Chr3	222909	222910	hy5-1_peak_1048	275.245	AT3G01572	downstream	58	listed	1
Chr3	222909	222910	hy5-1_peak_1048	275.245	AT3G01570	upstream	83	listed	1
Chr3	256771	256772	hy5-1_peak_1049	17.0943	AT3G01690	inside			1
Chr3	302093	302094	hy5-1_peak_1050	377.511	AT3G01850	upstream	56	listed	1
Chr3	302093	302094	hy5-1_peak_1050	377.511	AT3G01860	upstream	551	listed	1
Chr3	325288	325289	hy5-1_peak_1051	39.7945	AT3G01960	upstream	202		1
Chr3	325288	325289	hy5-1_peak_1051	39.7945	AT3G01961	inside			1
Chr3	350086	350087	hy5-1_peak_1052	21.1122	AT3G02040	upstream	77		1
Chr3	350086	350087	hy5-1_peak_1052	21.1122	AT3G02050	upstream	529	listed	1
Chr3	386958	386959	hy5-1_peak_1053	189.581	AT3G02140	upstream	421	listed	1
Chr3	476908	476909	hy5-1_peak_1054	13.8541	AT3G02335	downstream	36	listed	1
Chr3	476908	476909	hy5-1_peak_1054	13.8541	AT3G02330	upstream	317		1
Chr3	476908	476909	hy5-1_peak_1054	13.8541	AT3G02340	upstream	94	listed	1
Chr3	484233	484234	hy5-1_peak_1055	33.2119	AT3G02360	downstream	87		1
Chr3	484233	484234	hy5-1_peak_1055	33.2119	AT3G02370	upstream	257	listed	1
Chr3	512205	512206	hy5-1_peak_1056	45.1442	AT3G02480	upstream	106	listed	1
Chr3	512205	512206	hy5-1_peak_1056	45.1442	AT3G02490	upstream	1319	listed	1
Chr3	538284	538285	hy5-1_peak_1057	36.6348	AT3G02540	upstream	1943		1
Chr3	538284	538285	hy5-1_peak_1057	36.6348	AT3G02550	upstream	287	listed	1
Chr3	546780	546781	hy5-1_peak_1058	13.6148	AT3G02570	upstream	1186	listed	1
Chr3	546780	546781	hy5-1_peak_1058	13.6148	AT3G02580	upstream	122	listed	1
Chr3	622768	622769	hy5-1_peak_1059	19.1808	AT3G02850	inside		listed	1
Chr3	669574	669575	hy5-1_peak_1060	39.7945	AT3G02960	upstream	949		1
Chr3	669574	669575	hy5-1_peak_1060	39.7945	AT3G02970	inside			1
Chr3	757439	757440	hy5-1_peak_1061	32.3978	AT3G03260	inside			1
Chr3	765697	765698	hy5-1_peak_1062	8.53912	AT3G03272	upstream	1261		1
Chr3	765697	765698	hy5-1_peak_1062	8.53912	AT3G03290	upstream	1047		1
Chr3	765697	765698	hy5-1_peak_1062	8.53912	AT3G03280	inside			1
Chr3	812326	812327	hy5-1_peak_1063	338.578	AT3G03405	upstream	1532		1
Chr3	812326	812327	hy5-1_peak_1063	338.578	AT3G03410	upstream	608		1
Chr3	812326	812327	hy5-1_peak_1063	338.578	AT3G03420	upstream	121		1
Chr3	880487	880488	hy5-1_peak_1064	79.3139	AT3G03630	upstream	42		1
Chr3	880487	880488	hy5-1_peak_1064	79.3139	AT3G03640	upstream	518	listed	1
Chr3	907392	907393	hy5-1_peak_1065	84.8447	AT3G03680	upstream	107	listed	1
Chr3	910437	910438	hy5-1_peak_1066	105.617	AT3G03680	inside		listed	2
Chr3	961518	961519	hy5-1_peak_1067	269.763	AT3G03790	upstream	478	listed	1
Chr3	1127866	1127867	hy5-1_peak_1068	33.1037	AT3G04270	downstream	37		1
Chr3	1127866	1127867	hy5-1_peak_1068	33.1037	AT3G04260	upstream	352		1
Chr3	1159827	1159828	hy5-1_peak_1069	61.6454	AT3G04360	upstream	1518		1
Chr3	1159827	1159828	hy5-1_peak_1069	61.6454	AT3G04380	upstream	1559		1
Chr3	1159827	1159828	hy5-1_peak_1069	61.6454	AT3G04370	inside			1
Chr3	1186424	1186425	hy5-1_peak_1070	378.693	AT3G04450	downstream	65		1
Chr3	1186424	1186425	hy5-1_peak_1070	378.693	AT3G04460	upstream	59		1
Chr3	1231605	1231606	hy5-1_peak_1071	172.496	AT3G04570	inside			1
Chr3	1353221	1353222	hy5-1_peak_1072	11.1855	AT3G04910	upstream	1413		1
Chr3	1408559	1408560	hy5-1_peak_1073	7.59408	AT3G05050	downstream	53		1
Chr3	1408559	1408560	hy5-1_peak_1073	7.59408	AT3G05040	upstream	363		1
Chr3	1499082	1499083	hy5-1_peak_1074	417.953	AT3G05260	upstream	79		1
Chr3	1585111	1585112	hy5-1_peak_1075	11.0751	AT3G05480	upstream	190		1
Chr3	1598425	1598426	hy5-1_peak_1076	62.6821	AT3G05510	downstream	155		1
Chr3	1598425	1598426	hy5-1_peak_1076	62.6821	AT3G05520	upstream	121	listed	1
Chr3	1635071	1635072	hy5-1_peak_1077	9.7715	AT3G05630	upstream	128	listed	1
Chr3	1642967	1642968	hy5-1_peak_1078	63.3205	AT3G05640	inside		listed	1
Chr3	1684809	1684810	hy5-1_peak_1079	59.7692	AT3G05700	upstream	238		1
Chr3	1684809	1684810	hy5-1_peak_1079	59.7692	AT3G05710	upstream	186	listed	1
Chr3	1723628	1723629	hy5-1_peak_1080	16.6873	AT3G05790	inside			1
Chr3	1796042	1796043	hy5-1_peak_1081	22.7807	AT3G05980	inside			1
Chr3	1898193	1898194	hy5-1_peak_1082	12.95	AT3G06270	downstream	160		1
Chr3	1898193	1898194	hy5-1_peak_1082	12.95	AT3G06280	inside			1
Chr3	1959483	1959484	hy5-1_peak_1083	64.1084	AT3G06430	upstream	1185		1
Chr3	1984769	1984770	hy5-1_peak_1084	59.8698	AT3G06470	inside		listed	1
Chr3	1990351	1990352	hy5-1_peak_1085	6.4821	AT3G06483	downstream	64	listed	1
Chr3	1990351	1990352	hy5-1_peak_1085	6.4821	AT3G06480	upstream	199	listed	1
Chr3	2011690	2011691	hy5-1_peak_1087	34.3823	AT3G06500	upstream	388	listed	1
Chr3	2056112	2056113	hy5-1_peak_1088	104.654	AT3G06590	upstream	699	listed	1
Chr3	2100883	2100884	hy5-1_peak_1089	14.9137	AT3G06660	upstream	1518	listed	1
Chr3	2100883	2100884	hy5-1_peak_1089	14.9137	AT3G66658	upstream	1733	listed	1
Chr3	2100883	2100884	hy5-1_peak_1089	14.9137	AT3G36659	inside		listed	1
Chr3	2131065	2131066	hy5-1_peak_1090	94.3571	AT3G06750	upstream	751	listed	1
Chr3	2131065	2131066	hy5-1_peak_1090	94.3571	AT3G06760	upstream	1692	listed	1
Chr3	2143465	2143466	hy5-1_peak_1091	223.872	AT3G06778	upstream	1933		1
Chr3	2143465	2143466	hy5-1_peak_1091	223.872	AT3G06780	upstream	22	listed	1
Chr3	2155842	2155843	hy5-1_peak_1092	33.2317	AT3G06840	upstream	1019	listed	1
Chr3	2155842	2155843	hy5-1_peak_1092	33.2317	AT3G06830	inside		listed	1
Chr3	2161804	2161805	hy5-1_peak_1093	49.2044	AT3G06850	upstream	1182		1
Chr3	2161804	2161805	hy5-1_peak_1093	49.2044	AT3G06860	upstream	64		1
Chr3	2264368	2264369	hy5-1_peak_1094	12.1643	AT3G07150	inside			1
Chr3	2308693	2308694	hy5-1_peak_1095	47.2116	AT3G07250	upstream	389		1
Chr3	2308693	2308694	hy5-1_peak_1095	47.2116	AT3G07260	upstream	1010		1
Chr3	2343237	2343238	hy5-1_peak_1096	50.0406	AT3G07340	inside		listed	1
Chr3	2348954	2348955	hy5-1_peak_1097	54.6526	AT3G07350	downstream	164	listed	1
Chr3	2354648	2354649	hy5-1_peak_1098	135.008	AT3G07360	upstream	70	listed	1
Chr3	2394384	2394385	hy5-1_peak_1099	79.7014	AT3G07510	inside			1
Chr3	2455162	2455163	hy5-1_peak_1100	330.228	AT3G07670	downstream	303		1
Chr3	2455162	2455163	hy5-1_peak_1100	330.228	AT3G07680	upstream	127	listed	1
Chr3	2455162	2455163	hy5-1_peak_1100	330.228	AT3G07690	upstream	1945	listed	1
Chr3	2534795	2534796	hy5-1_peak_1101	52.9018	AT3G07950	downstream	292		1
Chr3	2534795	2534796	hy5-1_peak_1101	52.9018	AT3G07960	upstream	91	listed	1
Chr3	2543135	2543136	hy5-1_peak_1102	12.5881	AT3G07980	downstream	480		1
Chr3	2543135	2543136	hy5-1_peak_1102	12.5881	AT3G07970	inside			1
Chr3	2551024	2551025	hy5-1_peak_1103	44.4976	AT3G07990	upstream	1452		1
Chr3	2551024	2551025	hy5-1_peak_1103	44.4976	AT3G07980	inside			2
Chr3	2564823	2564824	hy5-1_peak_1104	20.239	AT3G08030	inside			1
Chr3	2573022	2573023	hy5-1_peak_1105	30.3751	AT3G08040	upstream	872	listed	1
Chr3	2627640	2627641	hy5-1_peak_1106	26.4682	AT3G08650	upstream	191		1
Chr3	2667500	2667501	hy5-1_peak_1107	303.514	AT3G08790	upstream	380	listed	1
Chr3	2667500	2667501	hy5-1_peak_1107	303.514	AT3G08780	inside		listed	1
Chr3	2828195	2828196	hy5-1_peak_1108	15.3665	AT3G09210	upstream	1316		1
Chr3	2828195	2828196	hy5-1_peak_1108	15.3665	AT3G09220	inside			1
Chr3	2930892	2930893	hy5-1_peak_1109	147.365	AT3G09550	upstream	972	listed	1
Chr3	2930892	2930893	hy5-1_peak_1109	147.365	AT3G09540	inside		listed	1
Chr3	2945298	2945299	hy5-1_peak_1110	5.54844	AT3G09595	downstream	397		1
Chr3	2945298	2945299	hy5-1_peak_1110	5.54844	AT3G09580	upstream	1221		1
Chr3	2945298	2945299	hy5-1_peak_1110	5.54844	AT3G09600	upstream	1107		1
Chr3	2945298	2945299	hy5-1_peak_1110	5.54844	AT3G09590	inside			1
Chr3	3000939	3000940	hy5-1_peak_1111	145.847	AT3G09780	inside			1
Chr3	3025881	3025882	hy5-1_peak_1112	9.20391	AT3G09850	upstream	31	listed	1
Chr3	3025881	3025882	hy5-1_peak_1112	9.20391	AT3G09860	upstream	173	listed	1
Chr3	3025881	3025882	hy5-1_peak_1112	9.20391	AT3G09863	upstream	1410	listed	1
Chr3	3091326	3091327	hy5-1_peak_1113	63.2217	AT3G10020	inside			1
Chr3	3238139	3238140	hy5-1_peak_1114	7.83853	AT3G10415	downstream	227	listed	1
Chr3	3238139	3238140	hy5-1_peak_1114	7.83853	AT3G10410	upstream	27		1
Chr3	3238139	3238140	hy5-1_peak_1114	7.83853	AT3G10420	upstream	1040	listed	1
Chr3	3238925	3238926	hy5-1_peak_1115	19.9946	AT3G10410	upstream	813		2
Chr3	3238925	3238926	hy5-1_peak_1115	19.9946	AT3G10415	upstream	524	listed	2
Chr3	3238925	3238926	hy5-1_peak_1115	19.9946	AT3G10420	upstream	254	listed	2
Chr3	3275486	3275487	hy5-1_peak_1116	130.567	AT3G10510	inside		listed	1
Chr3	3313178	3313179	hy5-1_peak_1117	46.4963	AT3G10590	upstream	1868		1
Chr3	3313178	3313179	hy5-1_peak_1117	46.4963	AT3G10595	upstream	348		1
Chr3	3313178	3313179	hy5-1_peak_1117	46.4963	AT3G10600	upstream	790		1
Chr3	3366425	3366426	hy5-1_peak_1118	27.1816	AT3G10740	upstream	1012		1
Chr3	3366425	3366426	hy5-1_peak_1118	27.1816	AT3G10750	upstream	501	listed	1
Chr3	3366425	3366426	hy5-1_peak_1118	27.1816	AT3G10745	inside			1
Chr3	3379188	3379189	hy5-1_peak_1119	8.90674	AT3G10800	upstream	65	listed	1
Chr3	3441627	3441628	hy5-1_peak_1120	70.5376	AT3G10985	upstream	900	listed	1
Chr3	3443138	3443139	hy5-1_peak_1121	101.383	AT3G10985	inside		listed	2
Chr3	3463490	3463491	hy5-1_peak_1122	86.9276	AT3G11040	downstream	179	listed	1
Chr3	3463490	3463491	hy5-1_peak_1122	86.9276	AT3G11050	upstream	107	listed	1
Chr3	3529142	3529143	hy5-1_peak_1123	83.4929	AT3G11270	inside			1
Chr3	3551390	3551391	hy5-1_peak_1124	117.83	AT3G11325	inside			1
Chr3	3575949	3575950	hy5-1_peak_1125	101.48	AT3G11395	downstream	33		1
Chr3	3575949	3575950	hy5-1_peak_1125	101.48	AT3G11397	upstream	67		1
Chr3	3575949	3575950	hy5-1_peak_1125	101.48	AT3G11402	inside			1
Chr3	3639430	3639431	hy5-1_peak_1126	36.4791	AT3G11550	downstream	234		1
Chr3	3639430	3639431	hy5-1_peak_1126	36.4791	AT3G11560	upstream	4	listed	1
Chr3	3651070	3651071	hy5-1_peak_1127	6.47628	AT3G11580	inside		listed	1
Chr3	3674991	3674992	hy5-1_peak_1128	24.0946	AT3G11640	inside			1
Chr3	3684756	3684757	hy5-1_peak_1129	25.9045	AT3G11670	upstream	199	listed	1
Chr3	3715380	3715381	hy5-1_peak_1130	23.0135	AT3G11745	upstream	802		1
Chr3	3715380	3715381	hy5-1_peak_1130	23.0135	AT3G11750	inside			1
Chr3	3738405	3738406	hy5-1_peak_1131	8.17248	AT3G11850	downstream	491		1
Chr3	3738405	3738406	hy5-1_peak_1131	8.17248	AT3G11840	upstream	149		1
Chr3	3772588	3772589	hy5-1_peak_1132	8.26208	AT3G11920	inside			1
Chr3	3894745	3894746	hy5-1_peak_1133	12.6983	AT3G12203	upstream	765		1
Chr3	3894745	3894746	hy5-1_peak_1133	12.6983	AT3G12210	upstream	32		1
Chr3	3923374	3923375	hy5-1_peak_1134	155.544	AT3G12300	upstream	220	listed	1
Chr3	3923374	3923375	hy5-1_peak_1134	155.544	AT3G12320	upstream	360	listed	1
Chr3	3964538	3964539	hy5-1_peak_1135	10.5461	AT3G12502	downstream	317	listed	1
Chr3	3964538	3964539	hy5-1_peak_1135	10.5461	AT3G12500	upstream	555	listed	1
Chr3	4045829	4045830	hy5-1_peak_1136	14.5931	AT3G12720	upstream	1221		1
Chr3	4122502	4122503	hy5-1_peak_1137	31.825	AT3G12920	inside		listed	1
Chr3	4190481	4190482	hy5-1_peak_1138	6.4127	AT3G13065	inside			1
Chr3	4248706	4248707	hy5-1_peak_1139	10.7171	AT3G13220	inside			1
Chr3	4254449	4254450	hy5-1_peak_1140	224.28	AT3G13222	upstream	183		1
Chr3	4254449	4254450	hy5-1_peak_1140	224.28	AT3G13223	upstream	78		1
Chr3	4254449	4254450	hy5-1_peak_1140	224.28	AT3G13224	upstream	293		1
Chr3	4311924	4311925	hy5-1_peak_1141	14.4962	AT3G13310	upstream	484	listed	1
Chr3	4379643	4379644	hy5-1_peak_1142	29.4678	AT3G13440	downstream	69		1
Chr3	4379643	4379644	hy5-1_peak_1142	29.4678	AT3G13445	upstream	149	listed	1
Chr3	4444048	4444049	hy5-1_peak_1144	16.0777	AT3G13600	upstream	1053	listed	1
Chr3	4546980	4546981	hy5-1_peak_1146	55.8524	AT3G13810	inside			1
Chr3	4657413	4657414	hy5-1_peak_1147	31.5569	AT3G14060	inside		listed	1
Chr3	4660839	4660840	hy5-1_peak_1148	299.83	AT3G14070	downstream	303	listed	1
Chr3	4660839	4660840	hy5-1_peak_1148	299.83	AT3G14067	upstream	56	listed	1
Chr3	4693283	4693284	hy5-1_peak_1149	22.7653	AT3G14150	upstream	283		1
Chr3	4693283	4693284	hy5-1_peak_1149	22.7653	AT3G14160	upstream	77		1
Chr3	4708942	4708943	hy5-1_peak_1150	63.0174	AT3G14185	downstream	329	listed	1
Chr3	4708942	4708943	hy5-1_peak_1150	63.0174	AT3G14180	upstream	95	listed	1
Chr3	4708942	4708943	hy5-1_peak_1150	63.0174	AT3G14190	upstream	1540	listed	1
Chr3	4723883	4723884	hy5-1_peak_1151	232.955		no hit			0
Chr3	4746488	4746489	hy5-1_peak_1152	11.3879	AT3G14250	inside			1
Chr3	4782560	4782561	hy5-1_peak_1153	295.204	AT3G14350	downstream	196		1
Chr3	4782560	4782561	hy5-1_peak_1153	295.204	AT3G14330	upstream	109		1
Chr3	4782560	4782561	hy5-1_peak_1153	295.204	AT3G14340	upstream	196		1
Chr3	4846109	4846110	hy5-1_peak_1154	283.338		no hit			0
Chr3	4976064	4976065	hy5-1_peak_1155	11.7982	AT3G14810	upstream	1531	listed	1
Chr3	4988632	4988633	hy5-1_peak_1156	136.439	AT3G14840	inside		listed	1
Chr3	5047330	5047331	hy5-1_peak_1157	333.442	AT3G14980	upstream	1928		1
Chr3	5047330	5047331	hy5-1_peak_1157	333.442	AT3G14990	upstream	69	listed	1
Chr3	5111225	5111226	hy5-1_peak_1159	8.17248	AT3G15180	upstream	667	listed	1
Chr3	5111225	5111226	hy5-1_peak_1159	8.17248	AT3G15170	inside		listed	1
Chr3	5187061	5187062	hy5-1_peak_1160	212.147	AT3G15355	downstream	133		1
Chr3	5187061	5187062	hy5-1_peak_1160	212.147	AT3G15357	upstream	54		1
Chr3	5187061	5187062	hy5-1_peak_1160	212.147	AT3G15360	upstream	1312	listed	1
Chr3	5232929	5232930	hy5-1_peak_1162	66.0077	AT3G15500	upstream	1687		1
Chr3	5242407	5242408	hy5-1_peak_1163	198.851	AT3G15510	upstream	1102	listed	1
Chr3	5252537	5252538	hy5-1_peak_1164	59.0284	AT3G15530	downstream	337	listed	1
Chr3	5252537	5252538	hy5-1_peak_1164	59.0284	AT3G15520	upstream	32	listed	1
Chr3	5253261	5253262	hy5-1_peak_1165	10.1811	AT3G15520	upstream	756	listed	2
Chr3	5253261	5253262	hy5-1_peak_1165	10.1811	AT3G15530	inside		listed	2
Chr3	5267112	5267113	hy5-1_peak_1166	61.9503	AT3G15550	upstream	238		1
Chr3	5267112	5267113	hy5-1_peak_1166	61.9503	AT3G15548	inside			1
Chr3	5296740	5296741	hy5-1_peak_1167	256.044	AT3G15630	downstream	106		1
Chr3	5296740	5296741	hy5-1_peak_1167	256.044	AT3G15620	upstream	149		1
Chr3	5311235	5311236	hy5-1_peak_1168	103.824	AT3G15660	upstream	1655		1
Chr3	5311235	5311236	hy5-1_peak_1168	103.824	AT3G15670	upstream	248	listed	1
Chr3	5397023	5397024	hy5-1_peak_1169	87.8813	AT3G15940	upstream	121		1
Chr3	5402706	5402707	hy5-1_peak_1170	40.5106	AT3G15950	upstream	55		1
Chr3	5469518	5469519	hy5-1_peak_1171	76.1277	AT3G16140	upstream	38		1
Chr3	5480181	5480182	hy5-1_peak_1172	20.6139	AT3G16175	upstream	282	listed	1
Chr3	5480181	5480182	hy5-1_peak_1172	20.6139	AT3G16170	inside		listed	1
Chr3	5518363	5518364	hy5-1_peak_1173	168.24	AT3G16280	inside			1
Chr3	5526074	5526075	hy5-1_peak_1174	229.217	AT3G16310	downstream	339		1
Chr3	5526074	5526075	hy5-1_peak_1174	229.217	AT3G16290	upstream	1080		1
Chr3	5526074	5526075	hy5-1_peak_1174	229.217	AT3G16300	inside			1
Chr3	5535773	5535774	hy5-1_peak_1175	54.989	AT3G16330	inside			1
Chr3	5576989	5576990	hy5-1_peak_1176	10.2459		no hit			0
Chr3	5585132	5585133	hy5-1_peak_1177	8.17248	AT3G16440	upstream	811		1
Chr3	5603474	5603475	hy5-1_peak_1178	18.5991	AT3G16480	downstream	489		1
Chr3	5603474	5603475	hy5-1_peak_1178	18.5991	AT3G16490	downstream	425		1
Chr3	5639238	5639239	hy5-1_peak_1179	62.4374	AT3G16560	upstream	757	listed	1
Chr3	5645101	5645102	hy5-1_peak_1180	63.9372	AT3G16570	inside			1
Chr3	5775495	5775496	hy5-1_peak_1181	6.10848	AT3G16910	inside		listed	1
Chr3	5782207	5782208	hy5-1_peak_1182	16.1697	AT3G16940	inside			1
Chr3	5797054	5797055	hy5-1_peak_1183	81.3494	AT3G16990	upstream	205	listed	1
Chr3	5797054	5797055	hy5-1_peak_1183	81.3494	AT3G17000	upstream	124	listed	1
Chr3	5822520	5822521	hy5-1_peak_1184	17.4368	AT3G17070	inside			1
Chr3	5839003	5839004	hy5-1_peak_1185	11.0072		no hit			0
Chr3	5844510	5844511	hy5-1_peak_1186	10.1545	AT3G17130	inside		listed	1
Chr3	5861338	5861339	hy5-1_peak_1187	154.286	AT3G17185	upstream	152		1
Chr3	5895076	5895077	hy5-1_peak_1188	10.859	AT3G17250	upstream	631		1
Chr3	5948869	5948870	hy5-1_peak_1189	16.5342	AT3G17370	downstream	136		1
Chr3	5948869	5948870	hy5-1_peak_1189	16.5342	AT3G17365	upstream	2		1
Chr3	5948869	5948870	hy5-1_peak_1189	16.5342	AT3G17380	upstream	1330		1
Chr3	5963318	5963319	hy5-1_peak_1190	12.6983	AT3G17420	upstream	1140		1
Chr3	5995570	5995571	hy5-1_peak_1191	13.119		no hit			0
Chr3	6000604	6000605	hy5-1_peak_1192	34.4895	AT3G17520	upstream	235		1
Chr3	6000604	6000605	hy5-1_peak_1192	34.4895	AT3G17530	upstream	255		1
Chr3	6025893	6025894	hy5-1_peak_1193	6.71941	AT3G17611	inside		listed	1
Chr3	6033227	6033228	hy5-1_peak_1194	6.28302	AT3G17650	upstream	970		1
Chr3	6033227	6033228	hy5-1_peak_1194	6.28302	AT3G17640	inside			1
Chr3	6065766	6065767	hy5-1_peak_1195	185.984	AT3G17730	inside			1
Chr3	6125979	6125980	hy5-1_peak_1196	10.2459	AT3G17890	upstream	1061		1
Chr3	6125979	6125980	hy5-1_peak_1196	10.2459	AT3G17880	inside			1
Chr3	6171859	6171860	hy5-1_peak_1198	21.3322	AT3G18035	upstream	136		1
Chr3	6182596	6182597	hy5-1_peak_1199	373.892	AT3G18060	upstream	1176		1
Chr3	6182596	6182597	hy5-1_peak_1199	373.892	AT3G18050	inside			1
Chr3	6191731	6191732	hy5-1_peak_1200	22.2217	AT3G18080	inside			1
Chr3	6273877	6273878	hy5-1_peak_1201	174.417	AT3G18290	upstream	117	listed	1
Chr3	6296794	6296795	hy5-1_peak_1202	26.1567	AT3G18350	upstream	55		1
Chr3	6301896	6301897	hy5-1_peak_1203	63.5666	AT3G18360	upstream	213	listed	1
Chr3	6301896	6301897	hy5-1_peak_1203	63.5666	AT3G18362	upstream	215	listed	1
Chr3	6404488	6404489	hy5-1_peak_1204	16.9907	AT3G18600	upstream	1141		1
Chr3	6404488	6404489	hy5-1_peak_1204	16.9907	AT3G18610	inside			1
Chr3	6457677	6457678	hy5-1_peak_1205	283.373	AT3G18760	downstream	12	listed	1
Chr3	6457677	6457678	hy5-1_peak_1205	283.373	AT3G18750	upstream	166	listed	1
Chr3	6490280	6490281	hy5-1_peak_1206	391.572	AT3G18830	inside		listed	1
Chr3	6501528	6501529	hy5-1_peak_1207	51.2359	AT3G18850	upstream	170		1
Chr3	6501528	6501529	hy5-1_peak_1207	51.2359	AT3G18860	upstream	139	listed	1
Chr3	6525498	6525499	hy5-1_peak_1208	9.9212	AT3G18930	inside			1
Chr3	6536595	6536596	hy5-1_peak_1209	7.93572	AT3G18950	upstream	119	listed	1
Chr3	6546144	6546145	hy5-1_peak_1210	239.462	AT3G18970	upstream	713		1
Chr3	6546144	6546145	hy5-1_peak_1210	239.462	AT3G18980	upstream	318	listed	1
Chr3	6673526	6673527	hy5-1_peak_1211	155.759	AT3G19270	downstream	200		1
Chr3	6678716	6678717	hy5-1_peak_1212	11.0751	AT3G19274	upstream	2		1
Chr3	6722790	6722791	hy5-1_peak_1213	11.4701	AT3G19390	upstream	198	listed	1
Chr3	6805367	6805368	hy5-1_peak_1214	134.547	AT3G19580	upstream	1135		1
Chr3	6805367	6805368	hy5-1_peak_1214	134.547	AT3G19590	upstream	263	listed	1
Chr3	6823576	6823577	hy5-1_peak_1215	75.4051	AT3G19640	downstream	271		1
Chr3	6823576	6823577	hy5-1_peak_1215	75.4051	AT3G19650	inside			1
Chr3	6834391	6834392	hy5-1_peak_1216	34.0311	AT3G19670	inside			1
Chr3	6900736	6900737	hy5-1_peak_1217	5.39882	AT3G19850	inside			1
Chr3	6931031	6931032	hy5-1_peak_1218	216.044	AT3G19920	inside		listed	1
Chr3	6980407	6980408	hy5-1_peak_1219	40.6995	AT3G20015	upstream	40		1
Chr3	7039509	7039510	hy5-1_peak_1220	8.45697	AT3G20160	inside			1
Chr3	7047010	7047011	hy5-1_peak_1221	10.9661	AT3G20200	upstream	570		1
Chr3	7047010	7047011	hy5-1_peak_1221	10.9661	AT3G20190	inside			1
Chr3	7063637	7063638	hy5-1_peak_1222	7.99646	AT3G20260	downstream	416		1
Chr3	7063637	7063638	hy5-1_peak_1222	7.99646	AT3G20250	upstream	398		1
Chr3	7093622	7093623	hy5-1_peak_1223	212.647	AT3G20330	upstream	953		1
Chr3	7093622	7093623	hy5-1_peak_1223	212.647	AT3G20340	upstream	122	listed	1
Chr3	7104375	7104376	hy5-1_peak_1224	35.2674	AT3G20362	downstream	126		1
Chr3	7104375	7104376	hy5-1_peak_1224	35.2674	AT3G20370	upstream	995		1
Chr3	7104375	7104376	hy5-1_peak_1224	35.2674	AT3G20365	inside			1
Chr3	7178086	7178087	hy5-1_peak_1225	11.7606	AT3G20555	downstream	113		1
Chr3	7178086	7178087	hy5-1_peak_1225	11.7606	AT3G20550	upstream	145		1
Chr3	7178086	7178087	hy5-1_peak_1225	11.7606	AT3G20557	upstream	1950		1
Chr3	7230589	7230590	hy5-1_peak_1226	23.2503	AT3G20670	downstream	444		1
Chr3	7230589	7230590	hy5-1_peak_1226	23.2503	AT3G20660	upstream	1995		1
Chr3	7230589	7230590	hy5-1_peak_1226	23.2503	AT3G20680	inside			1
Chr3	7281694	7281695	hy5-1_peak_1227	43.7321	AT3G20820	inside		listed	1
Chr3	7324030	7324031	hy5-1_peak_1228	194.634	AT3G20898	inside			1
Chr3	7324030	7324031	hy5-1_peak_1228	194.634	AT3G20900	inside			1
Chr3	7377274	7377275	hy5-1_peak_1229	10.7183	AT3G21055	upstream	89		1
Chr3	7377274	7377275	hy5-1_peak_1229	10.7183	AT3G21060	upstream	159		1
Chr3	7412868	7412869	hy5-1_peak_1230	20.1248	AT3G21140	upstream	644		1
Chr3	7412868	7412869	hy5-1_peak_1230	20.1248	AT3G21150	inside		listed	1
Chr3	7413723	7413724	hy5-1_peak_1231	38.1952	AT3G21160	downstream	123	listed	1
Chr3	7413723	7413724	hy5-1_peak_1231	38.1952	AT3G21140	upstream	1499		2
Chr3	7413723	7413724	hy5-1_peak_1231	38.1952	AT3G21150	upstream	185	listed	2
Chr3	7558642	7558643	hy5-1_peak_1232	43.7526	AT3G21460	upstream	685		1
Chr3	7594899	7594900	hy5-1_peak_1233	10.2361	AT3G21560	upstream	906	listed	1
Chr3	7608621	7608622	hy5-1_peak_1234	340.793	AT3G21600	upstream	215	listed	1
Chr3	7657948	7657949	hy5-1_peak_1235	11.2233	AT3G21720	upstream	1938	listed	1
Chr3	7668417	7668418	hy5-1_peak_1236	4.00401	AT3G21755	inside			1
Chr3	7668417	7668418	hy5-1_peak_1236	4.00401	AT3G21760	inside			1
Chr3	7675157	7675158	hy5-1_peak_1237	97.4322	AT3G21770	downstream	319		1
Chr3	7675157	7675158	hy5-1_peak_1237	97.4322	AT3G21781	upstream	896	listed	1
Chr3	7675157	7675158	hy5-1_peak_1237	97.4322	AT3G21780	inside		listed	1
Chr3	7732475	7732476	hy5-1_peak_1238	27.5415	AT3G21950	upstream	1920		1
Chr3	7732475	7732476	hy5-1_peak_1238	27.5415	AT3G21945	inside			1
Chr3	7834245	7834246	hy5-1_peak_1239	115.558	AT3G22190	upstream	197	listed	1
Chr3	7834245	7834246	hy5-1_peak_1239	115.558	AT3G22200	upstream	898	listed	1
Chr3	7855952	7855953	hy5-1_peak_1240	12.3423	AT3G22235	upstream	139		1
Chr3	7933895	7933896	hy5-1_peak_1242	63.6616	AT3G22410	inside		listed	1
Chr3	7959619	7959620	hy5-1_peak_1243	261.063	AT3G22436	upstream	1600		1
Chr3	7959619	7959620	hy5-1_peak_1243	261.063	AT3G22440	upstream	134	listed	1
Chr3	8035124	8035125	hy5-1_peak_1244	77.1439	AT3G22740	inside			1
Chr3	8065657	8065658	hy5-1_peak_1245	10.2524	AT3G22800	upstream	1102		1
Chr3	8087846	8087847	hy5-1_peak_1246	14.8906	AT3G22850	upstream	1156	listed	1
Chr3	8087846	8087847	hy5-1_peak_1246	14.8906	AT3G22845	inside		listed	1
Chr3	8101041	8101042	hy5-1_peak_1247	10.4448	AT3G22880	upstream	222	listed	1
Chr3	8111639	8111640	hy5-1_peak_1248	39.2177	AT3G22890	upstream	1083	listed	1
Chr3	8151826	8151827	hy5-1_peak_1249	96.4496	AT3G22968	upstream	211		1
Chr3	8151826	8151827	hy5-1_peak_1249	96.4496	AT3G22970	upstream	211	listed	1
Chr3	8209337	8209338	hy5-1_peak_1250	33.9131	AT3G23080	upstream	9	listed	1
Chr3	8245913	8245914	hy5-1_peak_1251	9.48493		no hit			0
Chr3	8322842	8322843	hy5-1_peak_1252	13.8477	AT3G23280	inside			1
Chr3	8435424	8435425	hy5-1_peak_1253	13.6148	AT3G23530	upstream	1246	listed	1
Chr3	8477420	8477421	hy5-1_peak_1254	23.4907	AT3G23605	downstream	29		1
Chr3	8477420	8477421	hy5-1_peak_1254	23.4907	AT3G23610	upstream	701	listed	1
Chr3	8489614	8489615	hy5-1_peak_1255	14.0029	AT3G23630	inside			1
Chr3	8533837	8533838	hy5-1_peak_1256	34.5849	AT3G23700	upstream	50	listed	1
Chr3	8533837	8533838	hy5-1_peak_1256	34.5849	AT3G23710	upstream	194	listed	1
Chr3	8591918	8591919	hy5-1_peak_1257	10.0298		no hit			0
Chr3	8741622	8741623	hy5-1_peak_1258	15.621	AT3G24190	upstream	1630	listed	1
Chr3	8741622	8741623	hy5-1_peak_1258	15.621	AT3G24180	inside		listed	1
Chr3	8941294	8941295	hy5-1_peak_1259	34.9038	AT3G24518	inside			1
Chr3	8941294	8941295	hy5-1_peak_1259	34.9038	AT3G24520	inside		listed	1
Chr3	8942354	8942355	hy5-1_peak_1260	254.643	AT3G24518	inside			2
Chr3	8942354	8942355	hy5-1_peak_1260	254.643	AT3G24520	inside		listed	2
Chr3	8961215	8961216	hy5-1_peak_1261	14.7133	AT3G24550	inside			1
Chr3	8980025	8980026	hy5-1_peak_1262	45.4441	AT3G24610	upstream	1924		1
Chr3	8980025	8980026	hy5-1_peak_1262	45.4441	AT3G24612	upstream	873	listed	1
Chr3	8980025	8980026	hy5-1_peak_1262	45.4441	AT3G24614	upstream	603	listed	1
Chr3	8980025	8980026	hy5-1_peak_1262	45.4441	AT3G24615	upstream	421	listed	1
Chr3	8987810	8987811	hy5-1_peak_1263	22.5438	AT3G24630	upstream	244	listed	1
Chr3	8992141	8992142	hy5-1_peak_1264	12.8934	AT3G24640	upstream	123	listed	1
Chr3	8999581	8999582	hy5-1_peak_1265	13.5058	AT3G24650	inside		listed	1
Chr3	9066336	9066337	hy5-1_peak_1266	142.223	AT3G24830	downstream	248		1
Chr3	9066336	9066337	hy5-1_peak_1266	142.223	AT3G24820	upstream	1959		1
Chr3	9066336	9066337	hy5-1_peak_1266	142.223	AT3G24840	upstream	503	listed	1
Chr3	9162154	9162155	hy5-1_peak_1267	12.2306	AT3G25160	upstream	88		1
Chr3	9192249	9192250	hy5-1_peak_1268	22.4054	AT3G25233	upstream	326		1
Chr3	9192249	9192250	hy5-1_peak_1268	22.4054	AT3G25240	upstream	290		1
Chr3	9315680	9315681	hy5-1_peak_1269	44.9823	AT3G25620	downstream	393		1
Chr3	9370889	9370890	hy5-1_peak_1270	87.2922	AT3G25710	inside		listed	1
Chr3	9377240	9377241	hy5-1_peak_1271	111.255	AT3G25717	upstream	1570		1
Chr3	9394606	9394607	hy5-1_peak_1272	19.8749	AT3G25727	upstream	273		1
Chr3	9394606	9394607	hy5-1_peak_1272	19.8749	AT3G25730	upstream	1813		1
Chr3	9450290	9450291	hy5-1_peak_1273	5.56259	AT3G25830	inside			1
Chr3	9472598	9472599	hy5-1_peak_1274	29.7376	AT3G25882	upstream	1649	listed	1
Chr3	9487577	9487578	hy5-1_peak_1275	6.49641	AT3G25905	upstream	807		1
Chr3	9487577	9487578	hy5-1_peak_1275	6.49641	AT3G25910	upstream	1643		1
Chr3	9555521	9555522	hy5-1_peak_1276	7.88064	AT3G26130	inside			1
Chr3	9577075	9577076	hy5-1_peak_1277	73.1992	AT3G26170	upstream	1928		1
Chr3	9676447	9676448	hy5-1_peak_1278	13.5006	AT3G26420	downstream	443		1
Chr3	9676447	9676448	hy5-1_peak_1278	13.5006	AT3G26440	upstream	116	listed	1
Chr3	9852406	9852407	hy5-1_peak_1279	9.13561	AT3G26782	inside			1
Chr3	9855246	9855247	hy5-1_peak_1280	10.5349	AT3G26790	inside			1
Chr3	9935582	9935583	hy5-1_peak_1281	15.8735	AT3G26935	upstream	84	listed	1
Chr3	9969089	9969090	hy5-1_peak_1282	23.3651	AT3G27025	upstream	615		1
Chr3	10047488	10047489	hy5-1_peak_1283	10.9974	AT3G27210	upstream	146		1
Chr3	10062177	10062178	hy5-1_peak_1284	8.98867	AT3G27250	inside		listed	1
Chr3	10073893	10073894	hy5-1_peak_1285	274.568	AT3G27270	inside		listed	1
Chr3	10119926	10119927	hy5-1_peak_1286	10.2459	AT3G27340	upstream	1307	listed	1
Chr3	10119926	10119927	hy5-1_peak_1286	10.2459	AT3G27330	inside		listed	1
Chr3	10130117	10130118	hy5-1_peak_1287	105.575	AT3G27360	upstream	181		1
Chr3	10130117	10130118	hy5-1_peak_1287	105.575	AT3G27380	inside		listed	1
Chr3	10201487	10201488	hy5-1_peak_1288	12.1343	AT3G27530	upstream	1475		1
Chr3	10255776	10255777	hy5-1_peak_1289	81.3026	AT3G27680	upstream	487		1
Chr3	10255776	10255777	hy5-1_peak_1289	81.3026	AT3G27690	upstream	170		1
Chr3	10308654	10308655	hy5-1_peak_1290	13.2703	AT3G27809	upstream	252		1
Chr3	10308654	10308655	hy5-1_peak_1290	13.2703	AT3G27810	inside		listed	1
Chr3	10330348	10330349	hy5-1_peak_1292	10.9161	AT3G27870	upstream	601		1
Chr3	10383953	10383954	hy5-1_peak_1293	16.9722	AT3G27960	upstream	862		1
Chr3	10392778	10392779	hy5-1_peak_1294	7.57808	AT3G27980	upstream	1125		1
Chr3	10392778	10392779	hy5-1_peak_1294	7.57808	AT3G27990	inside			1
Chr3	10548930	10548931	hy5-1_peak_1295	107.243	AT3G28291	upstream	1996		1
Chr3	10548930	10548931	hy5-1_peak_1295	107.243	AT3G28290	inside			1
Chr3	10567164	10567165	hy5-1_peak_1296	101.884	AT3G28300	inside			1
Chr3	10575573	10575574	hy5-1_peak_1297	19.2908	AT3G28310	upstream	1387		1
Chr3	10662879	10662880	hy5-1_peak_1298	66.3517	AT3G28430	upstream	114		1
Chr3	10717391	10717392	hy5-1_peak_1299	50.2252	AT3G28580	downstream	63		1
Chr3	10717391	10717392	hy5-1_peak_1299	50.2252	AT3G28590	upstream	928		1
Chr3	10790766	10790767	hy5-1_peak_1300	75.906	AT3G28740	upstream	214		1
Chr3	10931213	10931214	hy5-1_peak_1301	36.6784	AT3G28918	upstream	1752		1
Chr3	10949759	10949760	hy5-1_peak_1302	174.278		no hit			0
Chr3	11023116	11023117	hy5-1_peak_1303	24.994	AT3G29033	upstream	890		1
Chr3	11023920	11023921	hy5-1_peak_1304	19.4158	AT3G29033	upstream	86		2
Chr3	11052608	11052609	hy5-1_peak_1305	25.2257	AT3G29075	inside		listed	1
Chr3	11124620	11124621	hy5-1_peak_1306	87.4003		no hit			0
Chr3	11249792	11249793	hy5-1_peak_1307	123.409	AT3G29305	upstream	302		1
Chr3	11249792	11249793	hy5-1_peak_1307	123.409	AT3G29310	inside			1
Chr3	11384182	11384183	hy5-1_peak_1308	107.199	AT3G29575	upstream	179		1
Chr3	11551876	11551877	hy5-1_peak_1309	58.2969	AT3G29720	upstream	508		1
Chr3	11664217	11664218	hy5-1_peak_1310	12.5105		no hit			0
Chr3	11702942	11702943	hy5-1_peak_1311	189.622		no hit			0
Chr3	11784746	11784747	hy5-1_peak_1313	22.6361	AT3G30160	inside			1
Chr3	11920619	11920620	hy5-1_peak_1314	32.3632	AT3G30290	upstream	1074		1
Chr3	11974435	11974436	hy5-1_peak_1315	15.9663	AT3G30380	inside		listed	1
Chr3	12104262	12104263	hy5-1_peak_1316	17.452	AT3G30460	upstream	110		1
Chr3	12120766	12120767	hy5-1_peak_1317	47.0226		no hit			0
Chr3	12663922	12663923	hy5-1_peak_1318	19.4517		no hit			0
Chr3	13368184	13368185	hy5-1_peak_1319	23.5192	AT3G32410	downstream	250		1
Chr3	13396190	13396191	hy5-1_peak_1320	10.9161		no hit			0
Chr3	13424901	13424902	hy5-1_peak_1321	5.62467	AT3G32896	upstream	3		1
Chr3	13424901	13424902	hy5-1_peak_1321	5.62467	AT3G32905	upstream	608		1
Chr3	13590553	13590554	hy5-1_peak_1322	110.169		no hit			0
Chr3	13598622	13598623	hy5-1_peak_1323	37.0543		no hit			0
Chr3	13633132	13633133	hy5-1_peak_1324	19.8705		no hit			0
Chr3	13705915	13705916	hy5-1_peak_1325	56.4418		no hit			0
Chr3	13709954	13709955	hy5-1_peak_1326	18.3549		no hit			0
Chr3	13723284	13723285	hy5-1_peak_1327	9.22709		no hit			0
Chr3	13737016	13737017	hy5-1_peak_1328	8.1754		no hit			0
Chr3	13751468	13751469	hy5-1_peak_1329	59.7416		no hit			0
Chr3	13798642	13798643	hy5-1_peak_1330	11.7461		no hit			0
Chr3	13801105	13801106	hy5-1_peak_1331	8.68569		no hit			0
Chr3	13814835	13814836	hy5-1_peak_1332	34.9095		no hit			0
Chr3	13816307	13816308	hy5-1_peak_1333	32.8171		no hit			0
Chr3	13836688	13836689	hy5-1_peak_1334	17.8191		no hit			0
Chr3	13845703	13845704	hy5-1_peak_1335	6.99472		no hit			0
Chr3	13853916	13853917	hy5-1_peak_1336	27.7925		no hit			0
Chr3	13863241	13863242	hy5-1_peak_1337	3.79248		no hit			0
Chr3	13869777	13869778	hy5-1_peak_1338	3.92702		no hit			0
Chr3	13894542	13894543	hy5-1_peak_1339	22.7893		no hit			0
Chr3	13923108	13923109	hy5-1_peak_1340	50.4643		no hit			0
Chr3	13965366	13965367	hy5-1_peak_1341	146.25		no hit			0
Chr3	14175682	14175683	hy5-1_peak_1342	22.4141		no hit			0
Chr3	14180486	14180487	hy5-1_peak_1343	15.657		no hit			0
Chr3	14181360	14181361	hy5-1_peak_1344	8.59406		no hit			0
Chr3	14185375	14185376	hy5-1_peak_1345	12.0296		no hit			0
Chr3	14186430	14186431	hy5-1_peak_1346	8.16442		no hit			0
Chr3	14192448	14192449	hy5-1_peak_1347	71.8394		no hit			0
Chr3	14194037	14194038	hy5-1_peak_1348	27.9226	AT3G41761	upstream	1879		1
Chr3	14194700	14194701	hy5-1_peak_1349	29.2026	AT3G41761	upstream	1216		2
Chr3	14202372	14202373	hy5-1_peak_1350	16.5273		no hit			0
Chr3	14212757	14212758	hy5-1_peak_1351	9.7676		no hit			0
Chr3	14214731	14214732	hy5-1_peak_1352	8.1608		no hit			0
Chr3	14215556	14215557	hy5-1_peak_1353	14.884		no hit			0
Chr3	14223210	14223211	hy5-1_peak_1354	32.234		no hit			0
Chr3	14540287	14540288	hy5-1_peak_1355	26.3988		no hit			0
Chr3	14853495	14853496	hy5-1_peak_1356	22.2141		no hit			0
Chr3	14899607	14899608	hy5-1_peak_1357	6.87219		no hit			0
Chr3	15019916	15019917	hy5-1_peak_1358	8.516	AT3G42960	upstream	232		1
Chr3	15187868	15187869	hy5-1_peak_1359	37.779		no hit			0
Chr3	15196740	15196741	hy5-1_peak_1360	17.366	AT3G43220	downstream	122		1
Chr3	15300835	15300836	hy5-1_peak_1361	8.85365		no hit			0
Chr3	15600397	15600398	hy5-1_peak_1362	41.8235	AT3G43700	upstream	1470		1
Chr3	15680237	15680238	hy5-1_peak_1363	37.7354	AT3G43829	upstream	1383		1
Chr3	15930820	15930821	hy5-1_peak_1365	24.9361	AT3G44230	upstream	1313		1
Chr3	15952653	15952654	hy5-1_peak_1366	11.7606	AT3G44260	inside			1
Chr3	15987960	15987961	hy5-1_peak_1367	10.859	AT3G44310	inside			1
Chr3	16056068	16056069	hy5-1_peak_1368	12.8089		no hit			0
Chr3	16114819	16114820	hy5-1_peak_1369	145.017	AT3G44530	upstream	768		1
Chr3	16277412	16277413	hy5-1_peak_1370	245.813		no hit			0
Chr3	16303165	16303166	hy5-1_peak_1371	254.943	AT3G44755	downstream	435		1
Chr3	16318782	16318783	hy5-1_peak_1372	20.6607	AT3G44770	inside			1
Chr3	16358487	16358488	hy5-1_peak_1373	10.9029	AT3G44810	downstream	8		1
Chr3	16420876	16420877	hy5-1_peak_1374	28.9677	AT3G44950	upstream	168	listed	1
Chr3	16482003	16482004	hy5-1_peak_1375	68.1106		no hit			0
Chr3	16541982	16541983	hy5-1_peak_1376	353.594	AT3G45190	inside			1
Chr3	16630588	16630589	hy5-1_peak_1377	18.5698	AT3G45310	upstream	68		1
Chr3	16630588	16630589	hy5-1_peak_1377	18.5698	AT3G45320	upstream	1057		1
Chr3	16703782	16703783	hy5-1_peak_1378	10.9465	AT3G45530	upstream	417		1
Chr3	16883533	16883534	hy5-1_peak_1379	12.1643	AT3G45930	inside			1
Chr3	16898161	16898162	hy5-1_peak_1380	215.123	AT3G45980	upstream	149		1
Chr3	16914216	16914217	hy5-1_peak_1381	71.995	AT3G46020	upstream	867		1
Chr3	16914216	16914217	hy5-1_peak_1381	71.995	AT3G46030	upstream	86	listed	1
Chr3	16914216	16914217	hy5-1_peak_1381	71.995	AT3G46040	upstream	322	listed	1
Chr3	16914216	16914217	hy5-1_peak_1381	71.995	AT3G46050	upstream	1855	listed	1
Chr3	16992318	16992319	hy5-1_peak_1382	47.6708		no hit			0
Chr3	16999450	16999451	hy5-1_peak_1383	36.046	AT3G46260	inside			1
Chr3	17003144	17003145	hy5-1_peak_1384	98.3619	AT3G46270	inside			1
Chr3	17020196	17020197	hy5-1_peak_1385	15.8767	AT3G46320	inside			1
Chr3	17028338	17028339	hy5-1_peak_1386	54.2717	AT3G46340	inside			1
Chr3	17095641	17095642	hy5-1_peak_1387	60.7641	AT3G46460	downstream	236	listed	1
Chr3	17095641	17095642	hy5-1_peak_1387	60.7641	AT3G46450	upstream	3	listed	1
Chr3	17117574	17117575	hy5-1_peak_1388	161.262	AT3G46490	inside			1
Chr3	17182929	17182930	hy5-1_peak_1389	57.8784	AT3G46630	upstream	473	listed	1
Chr3	17182929	17182930	hy5-1_peak_1389	57.8784	AT3G46640	upstream	140	listed	1
Chr3	17212425	17212426	hy5-1_peak_1390	18.4031	AT3G46720	upstream	78		1
Chr3	17228567	17228568	hy5-1_peak_1391	20.7371	AT3G46780	upstream	105	listed	1
Chr3	17262086	17262087	hy5-1_peak_1392	19.449	AT3G46870	upstream	896		1
Chr3	17332758	17332759	hy5-1_peak_1393	109.789	AT3G47050	upstream	1870		1
Chr3	17332758	17332759	hy5-1_peak_1393	109.789	AT3G47060	upstream	226	listed	1
Chr3	17347422	17347423	hy5-1_peak_1394	24.1547	AT3G47110	inside			1
Chr3	17478878	17478879	hy5-1_peak_1396	20.3438	AT3G47430	upstream	1724	listed	1
Chr3	17494969	17494970	hy5-1_peak_1397	8.829	AT3G47470	inside		listed	1
Chr3	17551372	17551373	hy5-1_peak_1398	29.9841	AT3G47610	inside		listed	1
Chr3	17567413	17567414	hy5-1_peak_1399	71.0612	AT3G47630	upstream	1918		1
Chr3	17567413	17567414	hy5-1_peak_1399	71.0612	AT3G47640	inside		listed	1
Chr3	17704114	17704115	hy5-1_peak_1400	10.8294		no hit			0
Chr3	17710750	17710751	hy5-1_peak_1401	31.3514	AT3G47965	upstream	1842		1
Chr3	17710750	17710751	hy5-1_peak_1401	31.3514	AT3G47980	inside			1
Chr3	17739887	17739888	hy5-1_peak_1402	23.8332	AT3G48050	upstream	476		1
Chr3	17868275	17868276	hy5-1_peak_1403	48.8523	AT3G48237	upstream	1591		1
Chr3	17868275	17868276	hy5-1_peak_1403	48.8523	AT3G48240	inside		listed	1
Chr3	17895715	17895716	hy5-1_peak_1404	50.8498	AT3G48330	upstream	1741		1
Chr3	17920764	17920765	hy5-1_peak_1405	111.621	AT3G48390	upstream	50	listed	1
Chr3	17967842	17967843	hy5-1_peak_1406	33.1955	AT3G48510	inside		listed	1
Chr3	17975678	17975679	hy5-1_peak_1407	341.372	AT3G48515	upstream	1053		1
Chr3	17975678	17975679	hy5-1_peak_1407	341.372	AT3G48520	inside		listed	1
Chr3	18035327	18035328	hy5-1_peak_1409	29.2192	AT3G48680	inside		listed	1
Chr3	18103138	18103139	hy5-1_peak_1410	23.0618	AT3G48820	upstream	228		1
Chr3	18103138	18103139	hy5-1_peak_1410	23.0618	AT3G48830	upstream	13	listed	1
Chr3	18149162	18149163	hy5-1_peak_1411	25.6592	AT3G48950	inside			1
Chr3	18155733	18155734	hy5-1_peak_1412	226.145	AT3G48980	inside		listed	1
Chr3	18193458	18193459	hy5-1_peak_1413	121.083	AT3G49060	upstream	1467		1
Chr3	18193458	18193459	hy5-1_peak_1413	121.083	AT3G49070	inside			1
Chr3	18215678	18215679	hy5-1_peak_1414	76.1787	AT3G49142	downstream	109	listed	1
Chr3	18215678	18215679	hy5-1_peak_1414	76.1787	AT3G49140	upstream	60	listed	1
Chr3	18242767	18242768	hy5-1_peak_1415	269.837	AT3G49210	upstream	1531		1
Chr3	18250430	18250431	hy5-1_peak_1416	141.536	AT3G49220	inside		listed	1
Chr3	18373826	18373827	hy5-1_peak_1417	298.917	AT3G49570	upstream	803	listed	1
Chr3	18560857	18560858	hy5-1_peak_1418	24.0217	AT3G50060	upstream	1752	listed	1
Chr3	18584703	18584704	hy5-1_peak_1420	15.9789	AT3G50120	downstream	296		1
Chr3	18584703	18584704	hy5-1_peak_1420	15.9789	AT3G50110	upstream	169		1
Chr3	18588752	18588753	hy5-1_peak_1421	18.1457	AT3G50130	downstream	358		1
Chr3	18588752	18588753	hy5-1_peak_1421	18.1457	AT3G50120	upstream	1441		2
Chr3	18634717	18634718	hy5-1_peak_1422	14.2542	AT3G50270	upstream	1202	listed	1
Chr3	18634717	18634718	hy5-1_peak_1422	14.2542	AT3G50260	inside		listed	1
Chr3	18665588	18665589	hy5-1_peak_1423	21.3322	AT3G50340	inside			1
Chr3	18681825	18681826	hy5-1_peak_1424	267.841	AT3G50370	inside			1
[truncated: 1,629 more rows]

## Sheet: Table S3
Choromosome	Peak position 1	Peak position 2	Peak ID	Peak score	Number of ACGT on upstream of peak	ACGT position from peak	Number of ACGT on downstream of peak	ACGT position from peak	Total number of ACGT		Number of CACGT on upstream of peak	CACGT position from peak	Number of CACGT on downstream of peak	CACGT position from peak	Total number of CACGT
Chr1	52598	52599	hy5-1_peak_1	8.5587	1	-65	1	37	2		0		1	36	1
Chr1	58463	58464	hy5-1_peak_2	31.2561	3	-64, -19, -8	1	172	4		2	-65, -20	1	171	3
Chr1	79309	79310	hy5-1_peak_3	30.1471	0		1	6	1		0		0		0
Chr1	84494	84495	hy5-1_peak_4	171.847	0		2	1, 93	2		0		1	92	1
Chr1	99440	99441	hy5-1_peak_5	259.339	1	-38	3	3, 50, 112	4		1	-39	2	2, 112	3
Chr1	104884	104885	hy5-1_peak_6	378.809	3	-195, -189, -104	3	10, 89, 169	6		2	-190, -105	3	9, 88, 168	5
Chr1	113583	113584	hy5-1_peak_7	21.3841	3	-138, -119, -27	1	27	4		1	-28	1	27	2
Chr1	118145	118146	hy5-1_peak_8	8.75037	2	-90, -56	3	21, 126, 196	5		1	-57	1	125	2
Chr1	128992	128993	hy5-1_peak_9	144.095	0		1	1	1		0		1	1	1
Chr1	140449	140450	hy5-1_peak_10	27.7498	2	-70, -40	1	6	3		2	-71, -40	1	5	3
Chr1	149379	149380	hy5-1_peak_11	36.1556	2	-49, -13	1	6	3		1	-14	1	5	2
Chr1	190361	190362	hy5-1_peak_12	8.17248	1	-37	1	82	2		1	-38	1	81	2
Chr1	220259	220260	hy5-1_peak_13	404.308	4	-148, -45, -32, -4	3	4, 105, 119	7		3	-149, -46, -33	2	3, 104	5
Chr1	257143	257144	hy5-1_peak_14	9.6041	2	-134, -39	3	49, 74, 86	5		1	-40	2	74, 86	3
Chr1	268193	268194	hy5-1_peak_15	343.127	2	-41, -9	3	20, 46, 87	5		1	-10	3	45, 86, 20	4
Chr1	274156	274157	hy5-1_peak_16	20.31	0		1	4	1		0		0		0
Chr1	302535	302536	hy5-1_peak_17	19.6025	0		3	17, 81, 97	3		0		3	96, 17, 81	3
Chr1	368087	368088	hy5-1_peak_18	8.19871	0		2	26, 104	2		0		2	25, 103	2
Chr1	420132	420133	hy5-1_peak_19	82.5091	1	-29	1	3	2		1	-30	1	3	2
Chr1	436996	436997	hy5-1_peak_20	291.817	1	-37	1	5	2		0		0		0
Chr1	473618	473619	hy5-1_peak_21	31.446	1	-6	0		1		0		0		0
Chr1	482848	482849	hy5-1_peak_22	10.859	3	-198, -60, -5	2	26, 154	5		1	-60	2	25, 153	3
Chr1	498926	498927	hy5-1_peak_23	12.5173	4	-99, -88, -58, -18	0		4		1	-58	0		1
Chr1	528621	528622	hy5-1_peak_24	16.2898	0		2	3, 56	2		0		0		0
Chr1	534422	534423	hy5-1_peak_25	6.82488	1	-163	1	52	2		1	-164	0		1
Chr1	536951	536952	hy5-1_peak_26	16.6074	1	-96	2	1, 193	3		0		1	1	1
Chr1	565963	565964	hy5-1_peak_27	20.9059	4	-199, -156, -149, -116	1	4	5		2	-200, -157	1	3	3
Chr1	567403	567404	hy5-1_peak_28	96.9303	2	-119, -104	1	41	3		1	-120	1	40	2
Chr1	575625	575626	hy5-1_peak_29	260.013	3	-87, -58, -7	1	30	4		3	-88, -59, -7	1	29	4
Chr1	588245	588246	hy5-1_peak_30	157.219	1	-9	2	22, 169	3		1	-10	2	21, 168	3
Chr1	618714	618715	hy5-1_peak_31	247.646	2	-107, -83	2	8, 50	4		1	-84	2	49, 8	3
Chr1	644642	644643	hy5-1_peak_32	153.699	2	-39, -19	2	5, 40	4		0		2	4, 40	2
Chr1	707415	707416	hy5-1_peak_33	103.55	0		1	3	1		0		1	2	1
Chr1	728343	728344	hy5-1_peak_34	8.12125	2	-58, -17	1	18	3		2	-59, -18	1	18	3
Chr1	739584	739585	hy5-1_peak_35	122.883	0		0		0		0		0		0
Chr1	752362	752363	hy5-1_peak_36	278.548	0		1	6	1		0		1	6	1
Chr1	761355	761356	hy5-1_peak_37	51.3712	1	-176	1	76	2		0		1	75	1
Chr1	788260	788261	hy5-1_peak_38	169.06	2	-115, -52	1	128	3		0		1	127	1
Chr1	791224	791225	hy5-1_peak_39	88.009	3	-197, -109, -46	2	6, 134	5		0		1	133	1
Chr1	799058	799059	hy5-1_peak_40	12.1643	0		0		0		0		0		0
Chr1	870965	870966	hy5-1_peak_41	88.119	0		0		0		0		0		0
Chr1	898816	898817	hy5-1_peak_42	7.98591	1	-5	0		1		1	-6	0		1
Chr1	922098	922099	hy5-1_peak_43	5.56259	2	-167, -30	0		2		2	-168, -31	0		2
Chr1	958129	958130	hy5-1_peak_44	6.96356	2	-73, -23	1	48	3		1	-24	0		1
Chr1	993318	993319	hy5-1_peak_45	332.374	3	-187, -39, -31	2	2, 26	5		2	-39, -31	2	2, 26	4
Chr1	1043552	1043553	hy5-1_peak_46	418.013	1	-14	2	9, 83	3		1	-15	1	82	2
Chr1	1071983	1071984	hy5-1_peak_47	77.1212	0		4	2, 75, 123, 159	4		0		1	2	1
Chr1	1121145	1121146	hy5-1_peak_48	151.112	2	-114, -102	1	1	3		1	-102	0		1
Chr1	1143207	1143208	hy5-1_peak_49	10.4448	0		3	14, 27, 82	3		0		2	13, 27	2
Chr1	1159177	1159178	hy5-1_peak_50	9.67639	1	-4	1	15	2		1	-5	1	14	2
Chr1	1170746	1170747	hy5-1_peak_51	79.5624	0		3	54, 73, 102	3		0		3	53, 72, 101	3
Chr1	1191405	1191406	hy5-1_peak_52	30.3751	0		2	3, 160	2		0		2	2, 160	2
Chr1	1224655	1224656	hy5-1_peak_53	416.506	2	-43, -4	1	29	3		0		1	29	1
Chr1	1286386	1286387	hy5-1_peak_54	224.118	1	-32	1	1	2		1	-32	1	1	2
Chr1	1416214	1416215	hy5-1_peak_55	8.76812	2	-18, -8	1	20	3		2	-18, -8	1	19	3
Chr1	1445011	1445012	hy5-1_peak_56	8.08396	1	-91	1	184	2		0		1	183	1
Chr1	1469210	1469211	hy5-1_peak_57	387.144	2	-85, -10	3	60, 91, 125	5		2	-86, -11	2	59, 124	4
Chr1	1547375	1547376	hy5-1_peak_58	11.19	2	-129, -99	1	1	3		1	-99	0		1
Chr1	1569949	1569950	hy5-1_peak_59	366.367	2	-113, -101	2	5, 142	4		2	-113, -101	2	141, 5	4
Chr1	1590756	1590757	hy5-1_peak_60	57.6529	0		1	2	1		0		1	2	1
Chr1	1659526	1659527	hy5-1_peak_61	331.677	0		2	12, 34	2		0		0		0
Chr1	1729584	1729585	hy5-1_peak_62	6.71941	0		0		0		0		0		0
Chr1	1769193	1769194	hy5-1_peak_63	70.5245	0		0		0		0		0		0
Chr1	1905743	1905744	hy5-1_peak_64	9.86407	2	-55, -43	2	79, 104	4		0		0		0
Chr1	1940530	1940531	hy5-1_peak_65	25.6592	4	-51, -17, -13, -7	0		4		1	-7	0		1
Chr1	1986490	1986491	hy5-1_peak_66	18.4284	1	-29	0		1		1	-29	0		1
Chr1	1999059	1999060	hy5-1_peak_67	9.30126	4	-200, -188, -184, -126	2	5, 35	6		0		2	4, 34	2
Chr1	2013642	2013643	hy5-1_peak_68	9.29857	0		2	28, 123	2		0		2	27, 122	2
Chr1	2047751	2047752	hy5-1_peak_69	181.308	3	-191, -39, -10	0		3		2	-11, -39	0		2
Chr1	2143311	2143312	hy5-1_peak_70	6.57254	1	-23	0		1		1	-24	0		1
Chr1	2160871	2160872	hy5-1_peak_71	8.9404	1	-5	0		1		1	-6	0		1
Chr1	2163151	2163152	hy5-1_peak_72	9.02826	0		1	43	1		0		1	43	1
Chr1	2169917	2169918	hy5-1_peak_73	31.1668	0		3	6, 25, 195	3		0		2	5, 24	2
Chr1	2173209	2173210	hy5-1_peak_74	8.29674	2	-122, -108	4	16, 22, 34, 52	6		2	-123, -109	1	21	3
Chr1	2194654	2194655	hy5-1_peak_75	124.477	2	-36, -9	0		2		1	-10	0		1
Chr1	2195446	2195447	hy5-1_peak_76	111.739	2	-120, -90	1	38	3		1	-90	0		1
Chr1	2214311	2214312	hy5-1_peak_77	161.262	1	-30	1	3	2		0		1	2	1
Chr1	2225127	2225128	hy5-1_peak_78	13.6488	2	-90, -5	0		2		2	-90, -5	0		2
Chr1	2270040	2270041	hy5-1_peak_79	134.726	0		2	7, 162	2		0		1	6	1
Chr1	2283068	2283069	hy5-1_peak_80	175.635	3	-85, -80, -5	2	25, 195	5		3	-6, -85, -80	1	25	4
Chr1	2303579	2303580	hy5-1_peak_81	9.15504	1	-10	1	162	2		0		0		0
Chr1	2374921	2374922	hy5-1_peak_82	339.484	3	-171, -25, -7	1	39	4		2	-172, -8	1	38	3
Chr1	2391264	2391265	hy5-1_peak_83	27.4356	2	-150, -8	2	14, 172	4		1	-8	1	171	2
Chr1	2432809	2432810	hy5-1_peak_84	31.5967	2	-135, -118	2	11, 113	4		1	-119	1	10	2
Chr1	2442460	2442461	hy5-1_peak_85	11.3426	3	-164, -45, -5	0		3		2	-6, -45	0		2
Chr1	2498708	2498709	hy5-1_peak_86	14.4577	1	-9	0		1		1	-9	0		1
Chr1	2522807	2522808	hy5-1_peak_87	18.8349	1	-193	0		1		1	-193	0		1
Chr1	2530362	2530363	hy5-1_peak_88	263.347	2	-145, -93	1	1	3		0		1	1	1
Chr1	2580900	2580901	hy5-1_peak_89	15.621	1	-17	0		1		1	-17	0		1
Chr1	2665155	2665156	hy5-1_peak_90	9.10722	1	-21	0		1		0		0		0
Chr1	2788141	2788142	hy5-1_peak_91	11.2135	1	-196	1	29	2		0		0		0
Chr1	2827006	2827007	hy5-1_peak_92	36.0661	2	-148, -122	3	1, 41, 45	5		0		2	40, 1	2
Chr1	2853063	2853064	hy5-1_peak_93	37.7647	0		0		0		0		0		0
Chr1	2881556	2881557	hy5-1_peak_94	54.5441	0		1	5	1		0		1	5	1
Chr1	2889136	2889137	hy5-1_peak_95	215.497	2	-96, -74	4	1, 62, 68, 125	6		1	-75	2	1, 62	3
Chr1	2950694	2950695	hy5-1_peak_96	103.379	1	-4	0		1		0		0		0
Chr1	2976818	2976819	hy5-1_peak_97	361.337	2	-32, -11	2	13, 115	4		1	-12	2	12, 114	3
Chr1	3019544	3019545	hy5-1_peak_98	23.7267	1	-183	0		1		0		0		0
Chr1	3020442	3020443	hy5-1_peak_99	33.3982	0		1	25	1		0		1	25	1
Chr1	3072112	3072113	hy5-1_peak_100	16.6343	2	-113, -11	0		2		1	-11	0		1
Chr1	3151491	3151492	hy5-1_peak_101	11.5434	0		1	9	1		0		1	8	1
Chr1	3158752	3158753	hy5-1_peak_102	258.66	1	-50	4	5, 68, 117, 162	5		1	-51	2	68, 117	3
Chr1	3296266	3296267	hy5-1_peak_103	128.577	2	-41, -6	2	5, 121	4		2	-42, -6	2	120, 5	4
Chr1	3325610	3325611	hy5-1_peak_104	30.1599	0		1	22	1		0		0		0
Chr1	3400969	3400970	hy5-1_peak_105	65.4578	3	-112, -103, -93	2	22, 165	5		3	-113, -104, -94	2	22, 165	5
Chr1	3442687	3442688	hy5-1_peak_106	13.5058	2	-147, -5	1	4	3		1	-147	1	3	2
Chr1	3479382	3479383	hy5-1_peak_107	11.3753	2	-187, -16	2	101, 194	4		1	-16	1	100	2
Chr1	3590625	3590626	hy5-1_peak_108	7.22729	2	-54, -8	2	16, 55	4		2	-55, -9	1	15	3
Chr1	3680161	3680162	hy5-1_peak_109	16.1697	0		2	29, 142	2		0		1	29	1
Chr1	3702854	3702855	hy5-1_peak_110	9.01204	1	-36	1	3	2		1	-37	0		1
Chr1	3716112	3716113	hy5-1_peak_111	15.4711	0		2	13, 136	2		0		0		0
Chr1	3756698	3756699	hy5-1_peak_112	131.046	1	-8	3	47, 59, 84	4		1	-8	1	83	2
Chr1	3764866	3764867	hy5-1_peak_113	341.549	1	-30	1	14	2		1	-30	1	13	2
Chr1	3867078	3867079	hy5-1_peak_114	46.7128	1	-15	1	5	2		1	-15	1	4	2
Chr1	3903156	3903157	hy5-1_peak_115	83.9585	1	-4	0		1		0		0		0
Chr1	3931288	3931289	hy5-1_peak_116	26.7645	0		0		0		0		0		0
Chr1	3944682	3944683	hy5-1_peak_117	18.155	1	-164	3	28, 33, 129	4		0		2	27, 32	2
Chr1	3951040	3951041	hy5-1_peak_118	212.911	2	-72, -12	2	20, 80	4		2	-73, -12	2	19, 79	4
Chr1	4010622	4010623	hy5-1_peak_119	103.559	0		2	43, 73	2		0		1	42	1
Chr1	4024141	4024142	hy5-1_peak_120	126.529	0		0		0		0		0		0
Chr1	4066895	4066896	hy5-1_peak_121	10.9974	3	-132, -38, -6	1	109	4		2	-39, -7	1	108	3
Chr1	4137475	4137476	hy5-1_peak_122	217.988	1	-4	1	189	2		1	-5	1	188	2
Chr1	4167147	4167148	hy5-1_peak_123	31.9073	1	-13	1	53	2		1	-13	1	52	2
Chr1	4211712	4211713	hy5-1_peak_124	49.4581	1	-4	2	31, 73	3		0		1	72	1
Chr1	4230624	4230625	hy5-1_peak_125	15.9332	2	-44, -12	2	45, 103	4		2	-45, -13	2	44, 103	4
Chr1	4246182	4246183	hy5-1_peak_126	206.605	1	-6	2	66, 149	3		0		1	65	1
Chr1	4264610	4264611	hy5-1_peak_127	129.793	1	-94	0		1		0		0		0
Chr1	4290756	4290757	hy5-1_peak_128	220.519	1	-134	2	1, 147	3		1	-135	2	1, 147	3
Chr1	4301300	4301301	hy5-1_peak_129	8.35642	2	-133, -5	0		2		1	-6	0		1
Chr1	4358775	4358776	hy5-1_peak_130	28.2916	2	-122, -14	1	7	3		0		1	7	1
Chr1	4433395	4433396	hy5-1_peak_131	9.20725	1	-14	1	160	2		1	-15	0		1
Chr1	4458534	4458535	hy5-1_peak_132	12.3737	2	-65, -13	0		2		0		0		0
Chr1	4475690	4475691	hy5-1_peak_133	43.0153	1	-32	1	9	2		1	-33	1	8	2
Chr1	4529478	4529479	hy5-1_peak_134	158.48	2	-36, -28	1	1	3		1	-36	0		1
Chr1	4580143	4580144	hy5-1_peak_135	37.3758	1	-36	2	7, 110	3		0		2	6, 109	2
Chr1	4585446	4585447	hy5-1_peak_136	338.947	2	-19, -6	3	2, 56, 85	5		2	-19, -6	3	1, 55, 84	5
Chr1	4680200	4680201	hy5-1_peak_137	217.988	1	-4	1	21	2		0		1	20	1
Chr1	4713567	4713568	hy5-1_peak_138	10.5252	2	-61, -23	2	9, 25	4		2	-62, -24	1	24	3
Chr1	4735556	4735557	hy5-1_peak_139	22.2753	1	-7	2	135, 165	3		1	-8	0		1
Chr1	4762439	4762440	hy5-1_peak_140	33.4762	0		1	10	1		0		1	10	1
Chr1	4839798	4839799	hy5-1_peak_141	60.0394	1	-89	0		1		0		0		0
Chr1	4854717	4854718	hy5-1_peak_142	221.151	2	-82, -8	1	70	3		2	-83, -9	1	69	3
Chr1	4935962	4935963	hy5-1_peak_143	89.4082	2	-170, -13	1	12	3		1	-13	1	12	2
Chr1	4973925	4973926	hy5-1_peak_144	61.4437	3	-118, -27, -8	1	5	4		2	-9, -118	1	5	3
Chr1	5070616	5070617	hy5-1_peak_145	124.974	2	-23, -5	0		2		1	-6	0		1
Chr1	5147721	5147722	hy5-1_peak_146	29.2146	0		1	1	1		0		0		0
Chr1	5157759	5157760	hy5-1_peak_147	12.4315	0		1	47	1		0		0		0
Chr1	5169785	5169786	hy5-1_peak_148	19.579	0		1	11	1		0		1	10	1
Chr1	5228037	5228038	hy5-1_peak_149	32.882	1	-11	1	20	2		1	-12	1	19	2
Chr1	5265197	5265198	hy5-1_peak_150	7.88064	1	-91	1	14	2		0		1	13	1
Chr1	5274229	5274230	hy5-1_peak_151	25.1824	2	-165, -21	1	14	3		1	-22	1	13	2
Chr1	5290141	5290142	hy5-1_peak_152	199.145	2	-25, -9	2	73, 194	4		1	-9	1	73	2
Chr1	5366951	5366952	hy5-1_peak_153	11.9907	3	-192, -62, -32	3	21, 72, 136	6		2	-193, -33	1	20	3
Chr1	5390975	5390976	hy5-1_peak_154	341.662	1	-136	4	8, 39, 57, 192	5		0		4	7, 191, 39, 57	4
Chr1	5478861	5478862	hy5-1_peak_155	15.8338	1	-97	1	4	2		0		0		0
Chr1	5506922	5506923	hy5-1_peak_156	119.949	1	-11	1	40	2		1	-11	1	39	2
Chr1	5574028	5574029	hy5-1_peak_157	39.9895	0		3	1, 66, 72	3		0		1	1	1
Chr1	5610817	5610818	hy5-1_peak_158	6.64598	2	-174, -150	1	94	3		1	-151	1	94	2
Chr1	5630522	5630523	hy5-1_peak_159	11.5266	0		1	35	1		0		1	34	1
Chr1	5644906	5644907	hy5-1_peak_160	64.9947	0		3	2, 134, 146	3		0		2	2, 146	2
Chr1	5727502	5727503	hy5-1_peak_161	19.7291	1	-11	1	11	2		1	-12	1	10	2
Chr1	5744304	5744305	hy5-1_peak_162	90.6083	0		0		0		0		0		0
Chr1	5765826	5765827	hy5-1_peak_163	11.9907	2	-79, -39	2	2, 154	4		2	-80, -39	1	1	3
Chr1	5773363	5773364	hy5-1_peak_164	10.5461	0		1	9	1		0		0		0
Chr1	5849429	5849430	hy5-1_peak_165	7.6536	1	-22	1	41	2		0		1	41	1
Chr1	5977071	5977072	hy5-1_peak_166	7.88064	1	-9	3	5, 24, 62	4		1	-10	2	23, 62	3
Chr1	5998623	5998624	hy5-1_peak_167	74.5863	1	-48	2	15, 57	3		1	-49	1	57	2
Chr1	6017355	6017356	hy5-1_peak_168	33.8899	0		1	1	1		0		0		0
Chr1	6038743	6038744	hy5-1_peak_169	24.3183	1	-83	2	2, 93	3		0		0		0
Chr1	6058741	6058742	hy5-1_peak_170	27.2603	2	-23, -11	2	50, 187	4		2	-23, -11	1	186	3
Chr1	6062750	6062751	hy5-1_peak_171	55.2446	2	-56, -38	1	11	3		0		0		0
Chr1	6149175	6149176	hy5-1_peak_172	8.91829	2	-53, -12	0		2		1	-13	0		1
Chr1	6165879	6165880	hy5-1_peak_173	139.241	1	-38	1	8	2		0		0		0
Chr1	6195622	6195623	hy5-1_peak_174	9.2045	3	-158, -127, -17	3	109, 134, 154	6		0		1	134	1
Chr1	6200403	6200404	hy5-1_peak_175	9.2045	3	-156, -136, -111	3	15, 125, 156	6		1	-137	0		1
Chr1	6231673	6231674	hy5-1_peak_176	82.9796	2	-68, -13	2	32, 133	4		2	-14, -68	2	31, 132	4
Chr1	6240318	6240319	hy5-1_peak_177	20.453	1	-7	0		1		1	-8	0		1
Chr1	6268393	6268394	hy5-1_peak_178	8.29686	1	-71	0		1		0		0		0
Chr1	6279105	6279106	hy5-1_peak_179	287.419	1	-4	1	38	2		1	-5	0		1
Chr1	6294642	6294643	hy5-1_peak_180	234.448	4	-194, -189, -60, -18	3	8, 86, 132	7		2	-19, -60	1	86	3
Chr1	6302500	6302501	hy5-1_peak_181	51.3108	1	-69	0		1		0		0		0
Chr1	6304112	6304113	hy5-1_peak_182	12.7177	1	-30	0		1		0		0		0
Chr1	6352377	6352378	hy5-1_peak_183	139.969	2	-78, -51	3	24, 56, 152	5		1	-51	1	23	2
Chr1	6405473	6405474	hy5-1_peak_184	8.73134	1	-50	2	23, 39	3		0		2	22, 38	2
Chr1	6449627	6449628	hy5-1_peak_185	78.8068	1	-7	3	108, 176, 183	4		1	-8	0		1
Chr1	6453642	6453643	hy5-1_peak_186	27.3418	3	-103, -63, -16	1	8	4		2	-64, -17	1	7	3
Chr1	6474741	6474742	hy5-1_peak_187	360.49	1	-23	1	7	2		1	-23	1	7	2
Chr1	6562863	6562864	hy5-1_peak_188	202.421	1	-34	1	12	2		1	-35	1	11	2
Chr1	6672316	6672317	hy5-1_peak_189	195.454	2	-193, -10	2	5, 33	4		1	-11	2	32, 5	3
Chr1	6683182	6683183	hy5-1_peak_190	35.3255	0		1	1	1		0		1	1	1
Chr1	6688864	6688865	hy5-1_peak_191	41.4722	2	-21, -6	1	1	3		0		0		0
Chr1	6754249	6754250	hy5-1_peak_192	21.7758	2	-106, -40	3	120, 146, 154	5		2	-107, -41	2	119, 146	4
Chr1	6805483	6805484	hy5-1_peak_193	210.132	0		0		0		0		0		0
Chr1	6873113	6873114	hy5-1_peak_194	29.2791	0		2	6, 151	2		0		2	5, 150	2
Chr1	6883192	6883193	hy5-1_peak_195	36.4364	1	-35	5	5, 11, 55, 84, 114	6		0		3	4, 55, 84	3
Chr1	6899726	6899727	hy5-1_peak_196	53.1023	1	-13	1	119	2		1	-14	0		1
Chr1	6904833	6904834	hy5-1_peak_197	24.7991	1	-57	0		1		1	-58	0		1
Chr1	6939980	6939981	hy5-1_peak_198	8.29805	1	-32	0		1		0		0		0
Chr1	6946479	6946480	hy5-1_peak_199	76.7367	2	-78, -63	2	13, 35	4		1	-79	1	13	2
Chr1	6958544	6958545	hy5-1_peak_200	15.6927	0		3	18, 69, 143	3		0		2	17, 68	2
Chr1	7009492	7009493	hy5-1_peak_201	9.95785	2	-107, -6	1	13	3		1	-6	1	12	2
Chr1	7043537	7043538	hy5-1_peak_202	275.502	1	-28	2	4, 84	3		1	-29	2	4, 84	3
Chr1	7090212	7090213	hy5-1_peak_203	76.5489	4	-198, -112, -99, -5	3	44, 64, 162	7		3	-199, -113, -6	0		3
Chr1	7102729	7102730	hy5-1_peak_204	227.051	1	-154	0		1		0		0		0
Chr1	7179373	7179374	hy5-1_peak_205	152.115	0		1	177	1		0		1	176	1
Chr1	7258222	7258223	hy5-1_peak_206	16.7506	2	-197, -4	0		2		1	-5	0		1
Chr1	7267498	7267499	hy5-1_peak_207	343.824	2	-41, -5	2	12, 26	4		2	-42, -6	2	11, 26	4
Chr1	7294897	7294898	hy5-1_peak_208	30.699	0		1	16	1		0		1	16	1
Chr1	7340649	7340650	hy5-1_peak_209	14.6214	1	-94	4	24, 55, 83, 125	5		1	-95	3	23, 54, 82	4
Chr1	7402523	7402524	hy5-1_peak_210	137.264	2	-44, -32	2	2, 14	4		0		0		0
Chr1	7454130	7454131	hy5-1_peak_211	237.645	3	-176, -92, -8	2	77, 161	5		2	-93, -9	1	76	3
Chr1	7470336	7470337	hy5-1_peak_212	26.7048	1	-179	1	11	2		1	-180	1	10	2
Chr1	7524341	7524342	hy5-1_peak_213	33.8068	0		3	8, 28, 103	3		0		1	27	1
Chr1	7533302	7533303	hy5-1_peak_214	30.3751	0		1	2	1		0		1	1	1
Chr1	7573615	7573616	hy5-1_peak_215	40.3898	1	-6	0		1		0		0		0
Chr1	7579531	7579532	hy5-1_peak_216	137.747	1	-14	1	59	2		1	-14	1	59	2
Chr1	7611334	7611335	hy5-1_peak_217	175.62	1	-8	1	57	2		1	-9	1	56	2
Chr1	7612927	7612928	hy5-1_peak_218	217.939	3	-145, -72, -39	1	4	4		1	-40	0		1
Chr1	7613988	7613989	hy5-1_peak_219	139.855	1	-4	1	61	2		1	-5	1	60	2
Chr1	7645494	7645495	hy5-1_peak_220	11.0633	1	-88	2	118, 143	3		1	-89	1	142	2
Chr1	7661572	7661573	hy5-1_peak_221	319.253	2	-37, -8	0		2		2	-37, -8	0		2
Chr1	7692469	7692470	hy5-1_peak_222	12.1345	0		2	35, 72	2		0		1	72	1
Chr1	7732309	7732310	hy5-1_peak_223	26.8604	4	-86, -66, -35, -5	0		4		2	-67, -6	0		2
Chr1	7802362	7802363	hy5-1_peak_224	109.659	1	-13	1	9	2		1	-13	0		1
Chr1	7832745	7832746	hy5-1_peak_225	101.678	2	-121, -39	1	35	3		1	-40	1	34	2
Chr1	7886929	7886930	hy5-1_peak_226	70.6244	0		1	25	1		0		1	24	1
Chr1	7908366	7908367	hy5-1_peak_227	85.5416	0		0		0		0		0		0
Chr1	7945003	7945004	hy5-1_peak_228	53.4491	2	-45, -5	0		2		1	-6	0		1
Chr1	7988325	7988326	hy5-1_peak_229	11.0751	0		1	99	1		0		1	99	1
Chr1	7994674	7994675	hy5-1_peak_230	37.9201	1	-31	1	9	2		0		0		0
Chr1	8050799	8050800	hy5-1_peak_231	78.1197	0		0		0		0		0		0
Chr1	8060885	8060886	hy5-1_peak_232	359.59	3	-67, -42, -6	0		3		2	-68, -7	0		2
Chr1	8148901	8148902	hy5-1_peak_233	53.7647	2	-200, -11	1	132	3		1	-11	0		1
Chr1	8153789	8153790	hy5-1_peak_234	33.3533	2	-198, -42	4	6, 27, 32, 110	6		2	-199, -43	2	5, 26	4
Chr1	8165077	8165078	hy5-1_peak_235	10.9465	2	-160, -22	1	14	3		1	-161	1	14	2
Chr1	8175878	8175879	hy5-1_peak_236	93.3094	2	-145, -5	1	38	3		1	-6	1	37	2
Chr1	8227092	8227093	hy5-1_peak_237	10.9161	2	-26, -14	0		2		2	-26, -14	0		2
Chr1	8274427	8274428	hy5-1_peak_238	87.1379	0		2	34, 93	2		0		1	92	1
Chr1	8309189	8309190	hy5-1_peak_239	187.605	2	-109, -101	3	1, 22, 117	5		0		2	21, 116	2
Chr1	8321526	8321527	hy5-1_peak_240	162.626	2	-189, -110	1	45	3		1	-111	0		1
Chr1	8384928	8384929	hy5-1_peak_241	85.6733	2	-92, -47	3	10, 34, 118	5		0		3	9, 33, 117	3
Chr1	8424356	8424357	hy5-1_peak_242	10.2459	1	-5	0		1		1	-6	0		1
Chr1	8430139	8430140	hy5-1_peak_243	7.96743	2	-183, -51	1	33	3		1	-52	1	32	2
Chr1	8488011	8488012	hy5-1_peak_244	51.8103	0		4	36, 74, 111, 171	4		0		1	36	1
Chr1	8520126	8520127	hy5-1_peak_245	24.3665	1	-25	3	12, 59, 63	4		1	-26	1	63	2
Chr1	8535333	8535334	hy5-1_peak_246	5.93898	2	-179, -118	1	1	3		1	-180	0		1
Chr1	8635137	8635138	hy5-1_peak_247	21.6504	1	-5	0		1		1	-6	0		1
Chr1	8688889	8688890	hy5-1_peak_248	28.4993	0		1	15	1		0		0		0
Chr1	8693364	8693365	hy5-1_peak_249	149.732	0		2	7, 29	2		0		1	6	1
Chr1	8709754	8709755	hy5-1_peak_250	86.9276	1	-14	3	7, 21, 96	4		1	-14	2	20, 96	3
Chr1	8903455	8903456	hy5-1_peak_251	50.6326	0		2	115, 184	2		0		2	114, 183	2
Chr1	8911590	8911591	hy5-1_peak_252	48.4644	2	-19, -7	2	9, 18	4		0		1	8	1
Chr1	8917976	8917977	hy5-1_peak_253	19.1906	0		1	10	1		0		1	9	1
Chr1	8935020	8935021	hy5-1_peak_254	43.2871	1	-24	2	15, 193	3		1	-25	2	14, 192	3
Chr1	8959433	8959434	hy5-1_peak_255	13.4214	1	-8	2	12, 187	3		1	-9	2	11, 186	3
Chr1	8995912	8995913	hy5-1_peak_256	165.486	1	-37	0		1		0		0		0
Chr1	9092733	9092734	hy5-1_peak_257	20.5931	2	-57, -17	1	15	3		1	-17	1	15	2
Chr1	9128089	9128090	hy5-1_peak_258	86.1673	2	-74, -48	2	7, 67	4		1	-49	2	6, 66	3
Chr1	9253557	9253558	hy5-1_peak_259	24.217	2	-72, -4	2	6, 51	4		1	-73	1	5	2
Chr1	9365985	9365986	hy5-1_peak_260	97.4066	0		1	15	1		0		0		0
Chr1	9373813	9373814	hy5-1_peak_261	85.0582	1	-30	4	2, 21, 100, 128	5		0		2	1, 127	2
Chr1	9385354	9385355	hy5-1_peak_262	52.9415	1	-127	2	1, 69	3		0		2	1, 69	2
Chr1	9428974	9428975	hy5-1_peak_263	131.523	0		1	2	1		0		1	1	1
Chr1	9492867	9492868	hy5-1_peak_264	10.149	5	-184, -165, -151, -122, -11	2	3, 38	7		5	-185, -123, -12, -165, -151	0		5
Chr1	9499628	9499629	hy5-1_peak_265	29.0388	3	-128, -89, -76	2	12, 44	5		2	-89, -76	2	12, 44	4
Chr1	9519158	9519159	hy5-1_peak_266	78.0957	0		1	173	1		0		1	173	1
Chr1	9539619	9539620	hy5-1_peak_267	15.0094	2	-28, -8	1	17	3		1	-29	1	17	2
Chr1	9544401	9544402	hy5-1_peak_268	55.757	2	-25, -10	1	98	3		1	-11	0		1
Chr1	9628863	9628864	hy5-1_peak_269	21.3313	1	-22	1	4	2		0		1	3	1
Chr1	9650783	9650784	hy5-1_peak_270	5.70192	0		1	29	1		0		1	28	1
Chr1	9754015	9754016	hy5-1_peak_271	206.605	2	-137, -12	2	21, 64	4		1	-138	2	20, 64	3
Chr1	9790432	9790433	hy5-1_peak_272	18.2898	2	-103, -9	0		2		0		0		0
Chr1	9827539	9827540	hy5-1_peak_273	198.455	3	-159, -28, -6	3	20, 100, 171	6		2	-29, -6	2	19, 170	4
Chr1	9950083	9950084	hy5-1_peak_274	14.6098	1	-72	2	59, 90	3		1	-73	2	58, 89	3
Chr1	9952393	9952394	hy5-1_peak_275	42.4271	1	-10	1	62	2		1	-11	1	62	2
Chr1	10019792	10019793	hy5-1_peak_276	9.15504	0		0		0		0		0		0
Chr1	10035597	10035598	hy5-1_peak_277	83.7926	0		1	17	1		0		1	16	1
Chr1	10203060	10203061	hy5-1_peak_278	50.7166	1	-55	4	20, 46, 106, 136	5		1	-56	3	105, 135, 46	4
Chr1	10237339	10237340	hy5-1_peak_279	70.2868	0		1	130	1		0		1	129	1
Chr1	10261105	10261106	hy5-1_peak_280	161.82	2	-51, -10	2	23, 157	4		2	-52, -10	1	23	3
Chr1	10288116	10288117	hy5-1_peak_281	14.0238	2	-149, -97	2	11, 73	4		2	-149, -97	1	10	3
Chr1	10309739	10309740	hy5-1_peak_282	14.0797	1	-4	0		1		0		0		0
Chr1	10354070	10354071	hy5-1_peak_283	200.208	2	-136, -95	3	6, 27, 132	5		2	-137, -96	2	5, 26	4
Chr1	10365295	10365296	hy5-1_peak_284	8.66231	1	-80	1	27	2		1	-81	1	27	2
Chr1	10611010	10611011	hy5-1_peak_285	57.4291	1	-21	2	4, 35	3		0		2	4, 35	2
Chr1	10679976	10679977	hy5-1_peak_286	26.2949	0		1	5	1		0		1	5	1
Chr1	10810937	10810938	hy5-1_peak_287	296.888	2	-48, -4	0		2		1	-5	0		1
Chr1	10860544	10860545	hy5-1_peak_288	81.0667	3	-141, -57, -23	2	15, 161	5		2	-142, -24	1	14	3
Chr1	10893032	10893033	hy5-1_peak_289	78.8305	1	-67	0		1		0		0		0
Chr1	10904063	10904064	hy5-1_peak_290	222.105	2	-92, -24	3	17, 95, 151	5		1	-24	1	17	2
Chr1	10921953	10921954	hy5-1_peak_291	11.653	2	-53, -29	1	57	3		1	-30	0		1
Chr1	10956450	10956451	hy5-1_peak_292	109.665	0		2	1, 94	2		0		1	93	1
Chr1	10975403	10975404	hy5-1_peak_293	370.383	2	-34, -7	3	18, 39, 118	5		1	-7	2	17, 118	3
Chr1	11036423	11036424	hy5-1_peak_294	8.829	1	-35	0		1		1	-36	0		1
Chr1	11119570	11119571	hy5-1_peak_295	36.2537	0		2	8, 85	2		0		1	8	1
Chr1	11204859	11204860	hy5-1_peak_296	8.16235	0		0		0		0		0		0
Chr1	11396359	11396360	hy5-1_peak_297	7.61139	3	-123, -27, -10	1	135	4		2	-11, -123	0		2
Chr1	11445280	11445281	hy5-1_peak_298	17.4368	1	-15	2	6, 165	3		1	-16	2	5, 164	3
Chr1	11531983	11531984	hy5-1_peak_299	15.3714	1	-43	2	44, 99	3		1	-43	1	43	2
Chr1	11561967	11561968	hy5-1_peak_300	182.804	0		0		0		0		0		0
Chr1	11605402	11605403	hy5-1_peak_301	126.464	0		3	1, 20, 150	3		0		2	19, 149	2
Chr1	11655088	11655089	hy5-1_peak_302	103.731	0		2	4, 88	2		0		1	3	1
Chr1	11687608	11687609	hy5-1_peak_303	13.2943	1	-171	3	7, 33, 166	4		0		2	32, 7	2
Chr1	11717755	11717756	hy5-1_peak_304	10.3897	1	-144	4	32, 47, 75, 87	5		1	-144	2	32, 75	3
Chr1	11774364	11774365	hy5-1_peak_305	238.694	1	-24	2	17, 36	3		1	-24	2	16, 35	3
Chr1	11833031	11833032	hy5-1_peak_306	33.7811	3	-117, -35, -14	0		3		2	-36, -14	0		2
Chr1	11867451	11867452	hy5-1_peak_307	98.401	1	-159	2	5, 57	3		0		0		0
Chr1	11874598	11874599	hy5-1_peak_308	26.6249	0		0		0		0		0		0
Chr1	11915168	11915169	hy5-1_peak_309	6.94964	2	-191, -134	1	49	3		1	-134	0		1
Chr1	11920129	11920130	hy5-1_peak_310	19.9487	1	-9	1	115	2		1	-9	0		1
Chr1	11953655	11953656	hy5-1_peak_311	13.5058	3	-93, -63, -33	0		3		3	-93, -63, -33	0		3
Chr1	12011215	12011216	hy5-1_peak_312	12.2306	0		1	6	1		0		1	5	1
Chr1	12023581	12023582	hy5-1_peak_313	12.5881	0		1	14	1		0		1	13	1
Chr1	12123135	12123136	hy5-1_peak_314	297.911	1	-76	0		1		0		0		0
Chr1	12177818	12177819	hy5-1_peak_315	9.01204	1	-121	1	45	2		0		1	44	1
Chr1	12222751	12222752	hy5-1_peak_316	40.5106	2	-27, -5	1	28	3		2	-28, -6	0		2
Chr1	12251938	12251939	hy5-1_peak_317	23.1795	0		2	13, 151	2		0		1	13	1
Chr1	12417665	12417666	hy5-1_peak_318	46.4963	1	-139	2	3, 77	3		1	-140	1	2	2
Chr1	12478353	12478354	hy5-1_peak_319	15.6927	2	-174, -67	2	25, 52	4		0		1	25	1
Chr1	12530670	12530671	hy5-1_peak_320	11.8479	0		2	32, 92	2		0		2	31, 91	2
Chr1	12584403	12584404	hy5-1_peak_321	224.554	0		1	36	1		0		0		0
Chr1	12644479	12644480	hy5-1_peak_322	8.43663	1	-117	2	17, 49	3		0		2	17, 49	2
Chr1	12660202	12660203	hy5-1_peak_323	9.98499	0		3	2, 24, 89	3		0		0		0
Chr1	12661931	12661932	hy5-1_peak_324	49.3886	3	-47, -30, -7	0		3		3	-48, -30, -7	0		3
Chr1	12768527	12768528	hy5-1_peak_325	30.818	1	-12	3	1, 50, 193	4		1	-13	0		1
Chr1	12771933	12771934	hy5-1_peak_326	25.8156	1	-7	2	6, 55	3		1	-8	1	5	2
Chr1	12778745	12778746	hy5-1_peak_327	22.8129	0		3	10, 22, 71	3		0		2	9, 21	2
Chr1	12782162	12782163	hy5-1_peak_328	26.3061	0		3	8, 20, 69	3		0		2	7, 19	2
Chr1	12785588	12785589	hy5-1_peak_329	25.3832	1	-9	3	4, 53, 196	4		1	-10	1	3	2
Chr1	12792410	12792411	hy5-1_peak_330	31.0681	0		2	10, 59	2		0		1	9	1
Chr1	12795815	12795816	hy5-1_peak_331	21.3712	0		3	8, 20, 69	3		0		2	7, 19	2
Chr1	12799154	12799155	hy5-1_peak_332	24.0853	1	-8	3	5, 54, 197	4		1	-9	1	4	2
Chr1	13357189	13357190	hy5-1_peak_333	140.135	1	-9	0		1		1	-10	0		1
Chr1	13403283	13403284	hy5-1_peak_334	70.0266	0		1	193	1		0		0		0
Chr1	13604577	13604578	hy5-1_peak_335	170.59	1	-28	1	1	2		0		0		0
Chr1	13989753	13989754	hy5-1_peak_336	18.018	1	-5	0		1		1	-6	0		1
Chr1	14113611	14113612	hy5-1_peak_337	20.8556	0		0		0		0		0		0
Chr1	14311362	14311363	hy5-1_peak_338	24.7936	0		1	12	1		0		1	11	1
Chr1	14509642	14509643	hy5-1_peak_339	33.718	0		0		0		0		0		0
Chr1	14609536	14609537	hy5-1_peak_340	10.3114	0		0		0		0		0		0
Chr1	14659456	14659457	hy5-1_peak_341	7.41382	0		0		0		0		0		0
Chr1	14720987	14720988	hy5-1_peak_342	4.99599	0		0		0		0		0		0
Chr1	15082282	15082283	hy5-1_peak_343	107.286	0		0		0		0		0		0
Chr1	15094783	15094784	hy5-1_peak_344	7.40109	0		0		0		0		0		0
Chr1	15138328	15138329	hy5-1_peak_345	5.56154	0		0		0		0		0		0
Chr1	15267221	15267222	hy5-1_peak_346	15.6411	0		0		0		0		0		0
Chr1	15365357	15365358	hy5-1_peak_347	15.1136	0		0		0		0		0		0
Chr1	15389569	15389570	hy5-1_peak_348	6.80056	0		0		0		0		0		0
Chr1	15437141	15437142	hy5-1_peak_349	12.8072	0		0		0		0		0		0
Chr1	15550152	15550153	hy5-1_peak_350	12.9247	1	-41	2	11, 43	3		1	-42	2	10, 42	3
Chr1	15701384	15701385	hy5-1_peak_351	9.21497	0		0		0		0		0		0
Chr1	16231323	16231324	hy5-1_peak_352	30.705	2	-58, -15	0		2		1	-16	0		1
Chr1	16341202	16341203	hy5-1_peak_353	15.8227	1	-18	1	13	2		1	-19	1	12	2
Chr1	16342903	16342904	hy5-1_peak_354	42.049	1	-20	1	11	2		1	-21	1	10	2
Chr1	16412522	16412523	hy5-1_peak_355	13.2676	0		2	26, 50	2		0		2	25, 49	2
Chr1	16510465	16510466	hy5-1_peak_356	10.7265	0		0		0		0		0		0
Chr1	16594744	16594745	hy5-1_peak_357	15.5264	1	-96	1	10	2		0		1	9	1
Chr1	16643484	16643485	hy5-1_peak_358	53.9316	0		1	54	1		0		1	53	1
Chr1	16739627	16739628	hy5-1_peak_359	30.5197	1	-155	0		1		1	-156	0		1
Chr1	16831020	16831021	hy5-1_peak_360	281.065	1	-44	2	63, 90	3		1	-45	0		1
Chr1	16851306	16851307	hy5-1_peak_361	144.401	1	-8	1	13	2		1	-9	1	12	2
Chr1	16865221	16865222	hy5-1_peak_362	5.86148	0		1	12	1		0		1	11	1
Chr1	16875326	16875327	hy5-1_peak_363	70.9387	0		1	5	1		0		1	5	1
Chr1	17034673	17034674	hy5-1_peak_364	19.8749	0		2	5, 50	2		0		1	49	1
Chr1	17179505	17179506	hy5-1_peak_365	11.7637	4	-184, -139, -19, -12	0		4		3	-13, -139, -19	0		3
Chr1	17253762	17253763	hy5-1_peak_366	13.0355	1	-6	1	14	2		1	-7	1	13	2
Chr1	17268444	17268445	hy5-1_peak_367	170.203	3	-124, -52, -4	2	29, 120	5		1	-5	1	28	2
Chr1	17291101	17291102	hy5-1_peak_368	213.334	1	-16	2	4, 75	3		1	-17	1	3	2
Chr1	17340253	17340254	hy5-1_peak_369	19	0		2	32, 56	2		0		2	55, 32	2
Chr1	17686479	17686480	hy5-1_peak_370	11.7133	0		1	18	1		0		1	18	1
Chr1	17687547	17687548	hy5-1_peak_371	18.9627	1	-109	0		1		0		0		0
Chr1	17693983	17693984	hy5-1_peak_372	13.3859	1	-157	0		1		0		0		0
Chr1	17704446	17704447	hy5-1_peak_373	28.5083	4	-128, -80, -20, -11	2	127, 162	6		1	-11	2	126, 161	3
Chr1	17736133	17736134	hy5-1_peak_374	12.5887	0		1	66	1		0		0		0
Chr1	17765299	17765300	hy5-1_peak_375	118.228	0		1	1	1		0		0		0
Chr1	17846799	17846800	hy5-1_peak_376	74.2879	2	-183, -5	1	24	3		2	-184, -5	1	23	3
Chr1	17882952	17882953	hy5-1_peak_377	22.4937	0		0		0		0		0		0
Chr1	17892670	17892671	hy5-1_peak_378	38.7038	2	-176, -4	1	77	3		0		1	77	1
Chr1	17913519	17913520	hy5-1_peak_379	199.4	1	-45	0		1		1	-46	0		1
Chr1	17920426	17920427	hy5-1_peak_380	204.536	0		0		0		0		0		0
Chr1	17972375	17972376	hy5-1_peak_381	29.8581	1	-12	4	41, 136, 162, 185	5		1	-13	2	40, 135	3
Chr1	17976577	17976578	hy5-1_peak_382	146.822	0		0		0		0		0		0
Chr1	18018879	18018880	hy5-1_peak_383	20.3771	2	-113, -107	1	8	3		1	-107	1	7	2
Chr1	18036116	18036117	hy5-1_peak_384	300.608	1	-17	2	26, 123	3		1	-17	0		1
Chr1	18250109	18250110	hy5-1_peak_385	18.9154	0		1	171	1		0		1	171	1
Chr1	18379886	18379887	hy5-1_peak_386	76.0862	1	-8	0		1		1	-9	0		1
Chr1	18456584	18456585	hy5-1_peak_387	50.6326	1	-182	0		1		1	-182	0		1
Chr1	18493351	18493352	hy5-1_peak_388	58.3347	0		1	29	1		0		0		0
Chr1	18512199	18512200	hy5-1_peak_389	12.7126	1	-178	1	2	2		1	-179	0		1
Chr1	18635370	18635371	hy5-1_peak_390	14.1027	2	-132, -38	4	3, 53, 93, 176	6		0		1	93	1
Chr1	18690790	18690791	hy5-1_peak_391	80.6555	1	-65	2	3, 15	3		0		2	14, 3	2
Chr1	18744240	18744241	hy5-1_peak_392	21.1951	0		1	2	1		0		1	2	1
Chr1	18763831	18763832	hy5-1_peak_393	123.229	2	-72, -5	1	26	3		2	-73, -5	0		2
Chr1	18802642	18802643	hy5-1_peak_394	36.6327	0		0		0		0		0		0
Chr1	18945879	18945880	hy5-1_peak_395	9.93029	1	-141	3	1, 12, 23	4		1	-141	3	11, 22, 1	4
Chr1	18946505	18946506	hy5-1_peak_396	22.0512	2	-26, -16	2	15, 28	4		2	-27, -17	1	14	3
Chr1	19041600	19041601	hy5-1_peak_397	182.006	2	-26, -15	1	91	3		0		1	91	1
Chr1	19054456	19054457	hy5-1_peak_398	7.9727	0		1	9	1		0		1	8	1
Chr1	19161273	19161274	hy5-1_peak_399	331.264	3	-84, -27, -21	1	124	4		1	-27	0		1
Chr1	19258005	19258006	hy5-1_peak_400	30.3603	0		0		0		0		0		0
Chr1	19263201	19263202	hy5-1_peak_401	18.0328	1	-193	1	48	2		1	-193	1	47	2
Chr1	19429005	19429006	hy5-1_peak_402	17.2258	0		0		0		0		0		0
Chr1	19454761	19454762	hy5-1_peak_403	63.6872	1	-30	1	26	2		1	-31	1	25	2
Chr1	19489266	19489267	hy5-1_peak_404	385.867	3	-73, -67, -32	6	3, 33, 59, 69, 90, 159	9		2	-74, -68	3	68, 89, 3	5
Chr1	19581900	19581901	hy5-1_peak_405	19.449	2	-30, -9	0		2		2	-10, -30	0		2
Chr1	19590373	19590374	hy5-1_peak_406	403.339	3	-188, -32, -9	1	28	4		2	-33, -10	1	27	3
Chr1	19619543	19619544	hy5-1_peak_407	22.4751	2	-49, -37	2	2, 106	4		2	-38, -49	2	105, 2	4
Chr1	19759834	19759835	hy5-1_peak_408	253.586	0		0		0		0		0		0
Chr1	19812207	19812208	hy5-1_peak_409	6.4821	0		3	74, 136, 148	3		0		0		0
Chr1	19825545	19825546	hy5-1_peak_410	29.7376	3	-193, -129, -98	2	15, 155	5		2	-130, -193	1	14	3
Chr1	19841489	19841490	hy5-1_peak_411	58.1339	1	-166	1	5	2		0		1	4	1
Chr1	19853196	19853197	hy5-1_peak_412	6.46271	0		1	94	1		0		0		0
Chr1	19867422	19867423	hy5-1_peak_413	27.4278	2	-79, -12	1	43	3		1	-12	1	42	2
Chr1	19875549	19875550	hy5-1_peak_414	7.82877	2	-144, -138	1	5	3		1	-138	0		1
Chr1	19924579	19924580	hy5-1_peak_415	292.885	0		1	8	1		0		1	8	1
Chr1	20036589	20036590	hy5-1_peak_416	11.9907	1	-47	2	1, 165	3		1	-47	1	1	2
Chr1	20049671	20049672	hy5-1_peak_417	51.518	0		1	10	1		0		0		0
Chr1	20073703	20073704	hy5-1_peak_418	9.11715	1	-169	1	105	2		1	-169	1	104	2
Chr1	20098831	20098832	hy5-1_peak_419	21.2773	1	-9	2	148, 164	3		0		1	163	1
Chr1	20192183	20192184	hy5-1_peak_420	12.6983	1	-4	0		1		1	-5	0		1
Chr1	20210027	20210028	hy5-1_peak_421	350.279	1	-4	1	29	2		1	-5	1	28	2
Chr1	20227761	20227762	hy5-1_peak_422	12.6983	1	-59	1	59	2		1	-59	0		1
Chr1	20259349	20259350	hy5-1_peak_423	144.008	0		2	1, 33	2		0		1	1	1
Chr1	20272656	20272657	hy5-1_peak_424	8.82565	0		1	12	1		0		1	12	1
Chr1	20292107	20292108	hy5-1_peak_425	153.057	2	-114, -12	1	11	3		2	-13, -114	1	10	3
Chr1	20358958	20358959	hy5-1_peak_426	9.90297	0		1	10	1		0		1	9	1
Chr1	20458879	20458880	hy5-1_peak_427	32.882	0		4	16, 28, 181, 186	4		0		2	15, 27	2
Chr1	20493904	20493905	hy5-1_peak_428	69.3033	2	-144, -91	1	8	3		1	-145	1	7	2
Chr1	20606717	20606718	hy5-1_peak_429	23.3438	2	-167, -62	2	11, 106	4		0		1	11	1
Chr1	20690387	20690388	hy5-1_peak_430	185.93	1	-112	0		1		0		0		0
Chr1	20728251	20728252	hy5-1_peak_431	10.9161	2	-148, -7	2	23, 66	4		2	-149, -8	1	65	3
Chr1	20772272	20772273	hy5-1_peak_432	14.0868	1	-60	2	32, 63	3		1	-61	1	63	2
Chr1	20838819	20838820	hy5-1_peak_433	79.0708	1	-5	3	8, 63, 145	4		0		2	8, 145	2
Chr1	20864157	20864158	hy5-1_peak_434	18.4217	2	-93, -27	2	3, 85	4		0		2	2, 85	2
Chr1	20965252	20965253	hy5-1_peak_435	10.7183	2	-82, -31	0		2		1	-82	0		1
Chr1	21014783	21014784	hy5-1_peak_436	38.4489	0		2	13, 47	2		0		1	13	1
Chr1	21036765	21036766	hy5-1_peak_437	12.5881	0		2	2, 73	2		0		1	1	1
Chr1	21043252	21043253	hy5-1_peak_438	99.9466	2	-106, -70	3	3, 27, 43	5		2	-107, -71	1	26	3
Chr1	21088612	21088613	hy5-1_peak_439	135.305	1	-24	1	6	2		1	-25	1	6	2
Chr1	21092740	21092741	hy5-1_peak_440	47.835	1	-21	3	12, 62, 124	4		1	-21	3	11, 123, 62	4
Chr1	21137183	21137184	hy5-1_peak_441	13.8139	1	-10	0		1		0		0		0
Chr1	21207099	21207100	hy5-1_peak_442	128.282	3	-154, -32, -10	3	6, 71, 180	6		1	-33	2	5, 179	3
Chr1	21387033	21387034	hy5-1_peak_443	22.4751	1	-96	2	4, 36	3		0		0		0
Chr1	21419447	21419448	hy5-1_peak_444	11.8832	1	-31	1	12	2		1	-31	0		1
Chr1	21607307	21607308	hy5-1_peak_445	7.13906	1	-25	1	29	2		0		0		0
Chr1	21617440	21617441	hy5-1_peak_446	223.705	3	-114, -23, -14	1	21	4		1	-14	1	20	2
Chr1	21676466	21676467	hy5-1_peak_447	25.0531	4	-52, -45, -33, -27	0		4		1	-53	0		1
Chr1	21732537	21732538	hy5-1_peak_448	100.666	3	-155, -130, -13	1	28	4		2	-131, -14	1	28	3
Chr1	21913966	21913967	hy5-1_peak_449	57.727	0		5	7, 18, 50, 80, 109	5		0		3	6, 79, 108	3
Chr1	21939948	21939949	hy5-1_peak_450	8.08396	0		1	49	1		0		1	48	1
Chr1	21956513	21956514	hy5-1_peak_451	16.9722	3	-188, -63, -21	4	3, 15, 25, 61	7		2	-64, -22	1	3	3
Chr1	21973062	21973063	hy5-1_peak_452	13.5006	1	-4	3	34, 101, 166	4		0		1	34	1
Chr1	22031760	22031761	hy5-1_peak_453	6.49641	3	-150, -118, -25	1	2	4		3	-151, -119, -26	1	1	4
Chr1	22070871	22070872	hy5-1_peak_454	10.859	1	-99	0		1		1	-100	0		1
Chr1	22125328	22125329	hy5-1_peak_455	95.5427	1	-10	1	13	2		0		0		0
Chr1	22149796	22149797	hy5-1_peak_456	5.6386	1	-148	2	36, 65	3		0		0		0
Chr1	22198173	22198174	hy5-1_peak_457	24.0946	1	-33	4	18, 40, 87, 107	5		1	-34	3	17, 86, 40	4
Chr1	22227752	22227753	hy5-1_peak_458	17.366	1	-18	1	48	2		1	-19	1	48	2
Chr1	22576027	22576028	hy5-1_peak_459	15.9441	1	-18	2	8, 43	3		0		1	7	1
Chr1	22594245	22594246	hy5-1_peak_460	124.092	2	-173, -161	1	9	3		1	-174	0		1
Chr1	22627971	22627972	hy5-1_peak_461	142.287	0		2	21, 53	2		0		2	20, 52	2
Chr1	22646134	22646135	hy5-1_peak_462	94.5552	0		1	1	1		0		1	1	1
Chr1	22699960	22699961	hy5-1_peak_463	18.5292	0		1	3	1		0		1	2	1
Chr1	22724101	22724102	hy5-1_peak_464	7.65924	0		0		0		0		0		0
Chr1	22814240	22814241	hy5-1_peak_465	16.9907	1	-17	2	7, 14	3		1	-18	1	13	2
Chr1	22870940	22870941	hy5-1_peak_466	107.163	1	-13	2	5, 36	3		1	-13	1	5	2
Chr1	22977674	22977675	hy5-1_peak_467	145.52	1	-29	1	1	2		0		1	1	1
Chr1	23053892	23053893	hy5-1_peak_468	32.3632	1	-43	1	43	2		1	-43	1	42	2
Chr1	23072865	23072866	hy5-1_peak_469	12.2047	1	-165	3	15, 68, 151	4		0		3	14, 67, 151	3
Chr1	23088378	23088379	hy5-1_peak_470	56.5886	0		2	11, 35	2		0		2	10, 34	2
Chr1	23105156	23105157	hy5-1_peak_471	371.113	2	-34, -28	4	5, 57, 100, 191	6		1	-29	3	56, 99, 5	4
Chr1	23126684	23126685	hy5-1_peak_472	113.513	3	-50, -35, -4	1	60	4		3	-36, -5, -50	1	59	4
Chr1	23164034	23164035	hy5-1_peak_473	14.9765	1	-109	1	29	2		0		1	29	1
Chr1	23230747	23230748	hy5-1_peak_474	15.4775	1	-13	3	28, 85, 118	4		0		1	118	1
Chr1	23236591	23236592	hy5-1_peak_475	20.1582	1	-181	1	1	2		0		0		0
Chr1	23252598	23252599	hy5-1_peak_476	33.6765	0		2	6, 48	2		0		0		0
Chr1	23368068	23368069	hy5-1_peak_477	64.6803	2	-132, -121	1	3	3		2	-133, -122	1	3	3
Chr1	23371683	23371684	hy5-1_peak_478	27.152	1	-25	1	29	2		1	-26	1	29	2
Chr1	23395438	23395439	hy5-1_peak_479	47.6708	0		4	6, 38, 50, 61	4		0		4	5, 37, 50, 61	4
Chr1	23473749	23473750	hy5-1_peak_480	272.198	0		1	5	1		0		1	5	1
Chr1	23515959	23515960	hy5-1_peak_481	43.4273	1	-83	0		1		0		0		0
Chr1	23534252	23534253	hy5-1_peak_482	8.76812	0		1	8	1		0		1	7	1
Chr1	23633011	23633012	hy5-1_peak_483	209	2	-109, -8	3	28, 135, 169	5		2	-110, -8	3	27, 168, 135	5
Chr1	23690107	23690108	hy5-1_peak_484	305.079	1	-122	0		1		0		0		0
Chr1	23706795	23706796	hy5-1_peak_485	69.3144	1	-4	0		1		1	-5	0		1
Chr1	23716659	23716660	hy5-1_peak_486	291.478	0		1	4	1		0		1	3	1
Chr1	23762214	23762215	hy5-1_peak_487	22.5282	1	-86	1	12	2		1	-86	1	11	2
Chr1	23778498	23778499	hy5-1_peak_488	13.2761	1	-200	1	10	2		0		1	9	1
Chr1	23850571	23850572	hy5-1_peak_489	8.35642	0		1	130	1		0		0		0
Chr1	23895840	23895841	hy5-1_peak_490	93.9875	1	-158	3	8, 136, 157	4		0		1	7	1
Chr1	23946175	23946176	hy5-1_peak_491	16.0074	1	-32	2	9, 73	3		1	-32	2	72, 9	3
Chr1	24031110	24031111	hy5-1_peak_492	15.7034	1	-6	2	9, 97	3		1	-6	2	8, 96	3
Chr1	24061119	24061120	hy5-1_peak_493	172.392	1	-14	1	28	2		1	-15	1	28	2
Chr1	24127973	24127974	hy5-1_peak_494	6.32976	1	-9	0		1		1	-10	0		1
Chr1	24171152	24171153	hy5-1_peak_495	144.252	1	-168	1	1	2		0		0		0
Chr1	24273771	24273772	hy5-1_peak_496	4.57795	0		1	71	1		0		0		0
Chr1	24386271	24386272	hy5-1_peak_497	26.8606	1	-23	2	41, 143	3		1	-24	1	40	2
Chr1	24441001	24441002	hy5-1_peak_498	26.2863	2	-197, -66	2	6, 116	4		2	-198, -66	1	116	3
Chr1	24653136	24653137	hy5-1_peak_499	70.6244	0		0		0		0		0		0
Chr1	24666977	24666978	hy5-1_peak_500	8.98394	1	-84	1	100	2		0		1	99	1
Chr1	24681057	24681058	hy5-1_peak_501	92.9003	0		0		0		0		0		0
Chr1	24748472	24748473	hy5-1_peak_502	33.1209	0		0		0		0		0		0
Chr1	24767166	24767167	hy5-1_peak_503	7.50262	2	-171, -124	5	13, 29, 97, 103, 165	7		1	-171	3	96, 13, 103	4
Chr1	24831392	24831393	hy5-1_peak_504	144.832	6	-85, -62, -41, -24, -18, -4	4	3, 9, 43, 57	10		3	-86, -63, -42	0		3
Chr1	24957440	24957441	hy5-1_peak_505	9.90297	1	-160	1	15	2		0		1	14	1
Chr1	25016889	25016890	hy5-1_peak_506	214.022	3	-192, -133, -34	0		3		2	-134, -34	0		2
Chr1	25049531	25049532	hy5-1_peak_507	6.40557	1	-28	0		1		1	-29	0		1
Chr1	25145143	25145144	hy5-1_peak_508	8.38184	0		1	20	1		0		0		0
Chr1	25203126	25203127	hy5-1_peak_509	8.82565	0		2	32, 188	2		0		1	31	1
Chr1	25225441	25225442	hy5-1_peak_510	78.3551	2	-195, -13	2	7, 29	4		2	-196, -13	2	6, 29	4
Chr1	25231050	25231051	hy5-1_peak_511	54.1446	0		4	7, 20, 67, 153	4		0		3	6, 20, 153	3
Chr1	25250613	25250614	hy5-1_peak_512	24.2499	2	-61, -38	2	16, 98	4		0		2	16, 98	2
Chr1	25329151	25329152	hy5-1_peak_513	3.53283	1	-34	0		1		1	-34	0		1
Chr1	25427077	25427078	hy5-1_peak_514	7.78654	3	-52, -14, -4	2	45, 102	5		1	-15	1	45	2
Chr1	25442190	25442191	hy5-1_peak_515	33.6164	0		2	19, 82	2		0		2	18, 81	2
Chr1	25447781	25447782	hy5-1_peak_516	64.3861	2	-21, -16	1	11	3		2	-22, -16	1	10	3
Chr1	25484408	25484409	hy5-1_peak_517	14.668	0		1	2	1		0		1	1	1
Chr1	25493140	25493141	hy5-1_peak_518	131.117	1	-5	1	21	2		1	-6	0		1
Chr1	25508426	25508427	hy5-1_peak_519	179.536	2	-128, -4	1	55	3		1	-128	1	55	2
Chr1	25559173	25559174	hy5-1_peak_520	277.621	4	-85, -61, -46, -6	1	8	5		2	-62, -6	1	7	3
Chr1	25579271	25579272	hy5-1_peak_521	10.483	4	-186, -85, -75, -34	1	9	5		2	-75, -34	1	8	3
Chr1	25599341	25599342	hy5-1_peak_522	22.7711	1	-4	1	182	2		0		0		0
Chr1	25619817	25619818	hy5-1_peak_523	9.86407	0		3	21, 72, 106	3		0		1	106	1
Chr1	25644745	25644746	hy5-1_peak_524	7.05225	1	-26	0		1		1	-26	0		1
Chr1	25677484	25677485	hy5-1_peak_525	423.711	1	-13	2	6, 103	3		1	-14	2	102, 6	3
Chr1	25700644	25700645	hy5-1_peak_526	23.7895	0		1	9	1		0		1	9	1
Chr1	25732486	25732487	hy5-1_peak_527	7.88064	0		2	17, 64	2		0		1	16	1
Chr1	25766803	25766804	hy5-1_peak_528	11.2884	1	-58	1	86	2		1	-59	1	86	2
Chr1	25884160	25884161	hy5-1_peak_529	15.1113	2	-84, -26	1	2	3		1	-85	0		1
Chr1	25941624	25941625	hy5-1_peak_530	24.3665	6	-165, -135, -126, -83, -72, -10	1	37	7		6	-136, -127, -84, -73, -11, -165	1	36	7
Chr1	25951038	25951039	hy5-1_peak_531	18.5698	0		3	3, 58, 150	3		0		3	2, 58, 150	3
Chr1	25974797	25974798	hy5-1_peak_532	23.2602	1	-8	1	22	2		1	-9	1	21	2
Chr1	26060568	26060569	hy5-1_peak_533	18.4284	1	-60	0		1		0		0		0
Chr1	26074857	26074858	hy5-1_peak_534	3.87438	0		0		0		0		0		0
Chr1	26113254	26113255	hy5-1_peak_535	67.8752	0		1	5	1		0		1	4	1
Chr1	26120918	26120919	hy5-1_peak_536	76.9274	1	-5	2	46, 161	3		1	-6	1	45	2
Chr1	26123016	26123017	hy5-1_peak_537	136.617	0		2	6, 27	2		0		1	27	1
Chr1	26164529	26164530	hy5-1_peak_538	12.6351	3	-108, -59, -40	1	57	4		3	-109, -60, -41	1	56	4
Chr1	26181850	26181851	hy5-1_peak_539	7.10829	2	-157, -97	1	9	3		0		1	8	1
Chr1	26195760	26195761	hy5-1_peak_540	10.1528	1	-51	1	34	2		1	-51	1	34	2
Chr1	26276348	26276349	hy5-1_peak_541	19.0086	3	-88, -19, -14	2	47, 142	5		2	-20, -88	1	47	3
Chr1	26293229	26293230	hy5-1_peak_542	279.998	1	-7	1	26	2		1	-8	1	25	2
Chr1	26332062	26332063	hy5-1_peak_543	267.12	1	-20	3	37, 89, 160	4		1	-21	1	89	2
Chr1	26393891	26393892	hy5-1_peak_544	56.4013	0		0		0		0		0		0
Chr1	26424558	26424559	hy5-1_peak_545	19.4413	2	-184, -89	2	39, 80	4		2	-90, -184	0		2
Chr1	26439473	26439474	hy5-1_peak_546	294.917	1	-14	5	9, 48, 81, 96, 103	6		1	-15	2	8, 95	3
Chr1	26453788	26453789	hy5-1_peak_547	18.3734	0		3	38, 50, 94	3		0		2	37, 49	2
Chr1	26469599	26469600	hy5-1_peak_548	8.9404	1	-17	3	12, 17, 32	4		1	-18	2	16, 32	3
Chr1	26484994	26484995	hy5-1_peak_549	274.574	2	-47, -9	1	19	3		1	-48	1	18	2
Chr1	26513151	26513152	hy5-1_peak_550	24.7991	1	-36	1	180	2		1	-36	0		1
Chr1	26517336	26517337	hy5-1_peak_551	26.3828	2	-98, -5	1	25	3		0		0		0
Chr1	26541483	26541484	hy5-1_peak_552	53.3754	1	-7	2	17, 177	3		1	-7	1	16	2
Chr1	26569744	26569745	hy5-1_peak_553	146.39	1	-4	2	17, 103	3		1	-5	1	16	2
Chr1	26606436	26606437	hy5-1_peak_554	41.4722	1	-6	0		1		0		0		0
Chr1	26652593	26652594	hy5-1_peak_555	192.256	2	-198, -72	0		2		1	-198	0		1
Chr1	26666961	26666962	hy5-1_peak_556	41.7379	2	-54, -24	0		2		0		0		0
Chr1	26696498	26696499	hy5-1_peak_557	62.79	0		1	20	1		0		1	20	1
Chr1	26722615	26722616	hy5-1_peak_558	10.3445	0		2	26, 50	2		0		2	25, 49	2
Chr1	26752473	26752474	hy5-1_peak_559	10.483	4	-146, -128, -116, -7	1	131	5		3	-129, -117, -7	1	131	4
Chr1	26770324	26770325	hy5-1_peak_560	10.7187	1	-27	1	83	2		0		1	82	1
Chr1	26797918	26797919	hy5-1_peak_561	113.491	3	-69, -63, -4	1	143	4		2	-69, -63	0		2
Chr1	26852031	26852032	hy5-1_peak_562	32.415	2	-89, -8	2	21, 122	4		1	-8	1	21	2
Chr1	26896177	26896178	hy5-1_peak_563	6.64598	1	-5	0		1		1	-5	0		1
Chr1	26966284	26966285	hy5-1_peak_564	15.1113	1	-14	2	8, 75	3		1	-14	1	74	2
Chr1	27073551	27073552	hy5-1_peak_565	54.925	1	-17	2	115, 138	3		0		2	137, 115	2
Chr1	27088318	27088319	hy5-1_peak_566	272.88	2	-27, -7	2	28, 38	4		2	-8, -27	1	27	3
Chr1	27093549	27093550	hy5-1_peak_567	50.0063	0		2	10, 28	2		0		0		0
Chr1	27110743	27110744	hy5-1_peak_568	10.0625	2	-79, -56	1	64	3		2	-80, -57	0		2
Chr1	27134165	27134166	hy5-1_peak_569	30.1091	0		1	40	1		0		0		0
Chr1	27164136	27164137	hy5-1_peak_570	38.2884	2	-40, -9	1	185	3		2	-10, -40	0		2
Chr1	27170675	27170676	hy5-1_peak_571	9.20725	2	-70, -23	0		2		2	-71, -24	0		2
Chr1	27218002	27218003	hy5-1_peak_572	145.847	0		1	2	1		0		1	1	1
Chr1	27259682	27259683	hy5-1_peak_573	20.2107	0		1	27	1		0		0		0
Chr1	27302449	27302450	hy5-1_peak_574	80.2057	1	-194	1	8	2		0		1	8	1
Chr1	27349345	27349346	hy5-1_peak_575	7.88558	2	-54, -37	1	4	3		1	-55	1	4	2
Chr1	27374171	27374172	hy5-1_peak_576	11.5266	1	-22	0		1		0		0		0
Chr1	27389061	27389062	hy5-1_peak_577	17.4087	1	-43	3	19, 38, 147	4		1	-44	1	18	2
Chr1	27402271	27402272	hy5-1_peak_578	14.2114	2	-73, -61	1	2	3		2	-74, -62	1	1	3
Chr1	27409037	27409038	hy5-1_peak_579	17.6965	1	-18	0		1		1	-19	0		1
Chr1	27514869	27514870	hy5-1_peak_580	207.904	1	-26	0		1		1	-27	0		1
Chr1	27596090	27596091	hy5-1_peak_581	125.971	2	-119, -27	3	23, 70, 169	5		2	-120, -28	2	69, 168	4
Chr1	27650895	27650896	hy5-1_peak_582	11.9042	2	-42, -5	1	27	3		2	-42, -5	0		2
Chr1	27747886	27747887	hy5-1_peak_583	59.0723	0		2	6, 173	2		0		2	5, 172	2
Chr1	27769317	27769318	hy5-1_peak_584	51.9108	1	-21	4	1, 94, 132, 157	5		1	-21	1	1	2
Chr1	27780279	27780280	hy5-1_peak_585	135.097	2	-42, -6	1	57	3		1	-7	1	56	2
Chr1	27786281	27786282	hy5-1_peak_586	188.026	2	-165, -78	1	8	3		1	-166	1	8	2
Chr1	27790807	27790808	hy5-1_peak_587	193.423	3	-174, -62, -13	1	30	4		2	-14, -62	1	30	3
Chr1	27824342	27824343	hy5-1_peak_588	25.2194	1	-11	2	12, 38	3		1	-12	2	11, 38	3
Chr1	27876796	27876797	hy5-1_peak_589	126.092	1	-10	2	23, 175	3		0		0		0
Chr1	27901676	27901677	hy5-1_peak_590	29.2462	1	-40	0		1		1	-41	0		1
Chr1	27982257	27982258	hy5-1_peak_591	11.1855	3	-43, -33, -7	1	118	4		3	-44, -34, -8	1	118	4
Chr1	27999960	27999961	hy5-1_peak_592	18.785	2	-73, -28	3	79, 118, 197	5		0		2	78, 196	2
Chr1	28107798	28107799	hy5-1_peak_593	258.499	1	-16	1	8	2		1	-17	1	8	2
Chr1	28117469	28117470	hy5-1_peak_594	71.2719	1	-22	1	37	2		1	-23	1	36	2
Chr1	28164419	28164420	hy5-1_peak_595	11.3879	0		2	4, 96	2		0		2	3, 95	2
Chr1	28183103	28183104	hy5-1_peak_596	7.18675	0		1	63	1		0		1	63	1
Chr1	28193660	28193661	hy5-1_peak_597	428.302	2	-103, -91	2	3, 24	4		0		2	2, 23	2
Chr1	28284730	28284731	hy5-1_peak_598	302.827	2	-36, -5	2	45, 134	4		2	-6, -36	1	44	3
Chr1	28313439	28313440	hy5-1_peak_599	16.2049	0		0		0		0		0		0
Chr1	28387145	28387146	hy5-1_peak_600	208.533	4	-199, -64, -43, -31	2	8, 164	6		1	-31	1	8	2
Chr1	28439849	28439850	hy5-1_peak_601	227.428	1	-14	1	19	2		1	-15	1	18	2
Chr1	28460362	28460363	hy5-1_peak_602	25.8427	3	-196, -95, -59	2	11, 187	5		2	-197, -59	1	10	3
Chr1	28509389	28509390	hy5-1_peak_603	34.6277	3	-107, -51, -15	0		3		0		0		0
Chr1	28533695	28533696	hy5-1_peak_604	308.881	0		3	9, 84, 140	3		0		2	83, 9	2
Chr1	28554873	28554874	hy5-1_peak_605	123.986	0		1	28	1		0		0		0
Chr1	28595699	28595700	hy5-1_peak_606	9.5017	1	-42	1	20	2		1	-43	0		1
Chr1	28603330	28603331	hy5-1_peak_607	372.806	3	-57, -20, -9	3	1, 44, 170	6		0		1	1	1
Chr1	28625284	28625285	hy5-1_peak_608	51.8103	2	-73, -14	2	1, 90	4		1	-15	1	1	2
Chr1	28746837	28746838	hy5-1_peak_609	277.026	0		1	172	1		0		0		0
Chr1	28823467	28823468	hy5-1_peak_610	68.6736	0		1	9	1		0		0		0
Chr1	28878253	28878254	hy5-1_peak_611	425.826	1	-36	5	3, 10, 34, 59, 196	6		1	-36	4	33, 195, 3, 59	5
Chr1	28928610	28928611	hy5-1_peak_612	79.6279	1	-17	4	14, 84, 109, 122	5		1	-18	1	13	2
Chr1	28940213	28940214	hy5-1_peak_613	159.724	2	-192, -9	2	4, 28	4		1	-10	1	3	2
Chr1	29012595	29012596	hy5-1_peak_614	23.941	1	-199	1	13	2		0		1	12	1
Chr1	29035613	29035614	hy5-1_peak_615	180.13	2	-29, -5	2	51, 69	4		2	-30, -6	0		2
Chr1	29073766	29073767	hy5-1_peak_616	252.569	1	-22	2	6, 28	3		0		2	5, 27	2
Chr1	29093506	29093507	hy5-1_peak_617	8.91829	1	-9	2	51, 60	3		0		2	50, 59	2
Chr1	29099749	29099750	hy5-1_peak_618	207.725	2	-109, -69	2	1, 41	4		1	-69	1	40	2
Chr1	29114148	29114149	hy5-1_peak_619	25.5154	0		4	18, 96, 141, 160	4		0		1	17	1
Chr1	29179317	29179318	hy5-1_peak_620	31.0768	0		1	53	1		0		1	52	1
Chr1	29217933	29217934	hy5-1_peak_621	76.1475	3	-131, -109, -22	1	14	4		3	-132, -110, -22	1	13	4
Chr1	29239221	29239222	hy5-1_peak_622	24.7948	2	-193, -93	1	19	3		0		0		0
Chr1	29249084	29249085	hy5-1_peak_623	33.3257	3	-193, -173, -134	4	5, 68, 73, 128	7		1	-174	2	67, 5	3
Chr1	29263202	29263203	hy5-1_peak_624	93.2528	1	-4	0		1		1	-5	0		1
Chr1	29278138	29278139	hy5-1_peak_625	119.511	0		1	9	1		0		0		0
Chr1	29284647	29284648	hy5-1_peak_626	4.26759	1	-31	0		1		1	-32	0		1
Chr1	29329421	29329422	hy5-1_peak_627	6.03701	2	-75, -10	0		2		1	-11	0		1
Chr1	29360189	29360190	hy5-1_peak_628	39.4074	1	-4	0		1		0		0		0
Chr1	29429376	29429377	hy5-1_peak_629	293.514	0		1	129	1		0		0		0
Chr1	29438817	29438818	hy5-1_peak_630	12.2245	0		2	4, 110	2		0		2	4, 110	2
Chr1	29452025	29452026	hy5-1_peak_631	4.02844	1	-50	2	25, 74	3		0		2	24, 74	2
Chr1	29516312	29516313	hy5-1_peak_632	25.9045	2	-55, -33	0		2		2	-56, -34	0		2
Chr1	29537159	29537160	hy5-1_peak_633	13.3137	1	-6	0		1		0		0		0
Chr1	29665440	29665441	hy5-1_peak_634	218.656	2	-66, -26	1	67	3		1	-27	1	66	2
Chr1	29701441	29701442	hy5-1_peak_635	11.8832	0		1	1	1		0		0		0
Chr1	29716183	29716184	hy5-1_peak_636	53.2758	1	-9	2	79, 153	3		1	-10	2	152, 79	3
Chr1	29736502	29736503	hy5-1_peak_637	70.6578	1	-36	3	19, 94, 170	4		0		1	170	1
Chr1	29782527	29782528	hy5-1_peak_638	9.40077	0		0		0		0		0		0
Chr1	29873011	29873012	hy5-1_peak_639	14.4182	2	-199, -21	2	3, 8	4		2	-22, -199	1	2	3
Chr1	29887469	29887470	hy5-1_peak_640	103.394	0		1	9	1		0		1	8	1
Chr1	29919580	29919581	hy5-1_peak_641	30.2025	0		3	39, 56, 155	3		0		3	55, 154, 39	3
Chr1	30018273	30018274	hy5-1_peak_642	10.5349	0		2	23, 41	2		0		2	22, 41	2
Chr1	30114550	30114551	hy5-1_peak_643	44.2136	0		1	8	1		0		1	7	1
Chr1	30131677	30131678	hy5-1_peak_644	66.2852	0		3	5, 12, 58	3		0		3	11, 5, 58	3
Chr1	30190237	30190238	hy5-1_peak_645	197.617	1	-100	1	8	2		1	-100	1	7	2
Chr1	30201972	30201973	hy5-1_peak_646	20.5931	1	-20	3	13, 95, 179	4		1	-21	2	12, 94	3
Chr1	30208184	30208185	hy5-1_peak_647	30.2721	0		1	39	1		0		1	38	1
Chr1	30242316	30242317	hy5-1_peak_648	118.909	2	-179, -14	4	6, 26, 93, 164	6		1	-179	3	92, 6, 164	4
Chr1	30303858	30303859	hy5-1_peak_649	3.74976	1	-106	0		1		1	-106	0		1
Chr1	30371558	30371559	hy5-1_peak_650	15.9663	3	-28, -22, -13	0		3		2	-28, -13	0		2
Chr1	30387735	30387736	hy5-1_peak_651	22.0512	1	-13	0		1		1	-14	0		1
Chr2	1386	1387	hy5-1_peak_652	53.1683	0		0		0		0		0		0
Chr2	2829	2830	hy5-1_peak_653	44.5605	0		0		0		0		0		0
Chr2	3579	3580	hy5-1_peak_654	47.399	0		0		0		0		0		0
Chr2	4554	4555	hy5-1_peak_655	31.1215	0		0		0		0		0		0
Chr2	5962	5963	hy5-1_peak_656	19.4951	2	-134, -38	0		2		1	-39	0		1
Chr2	9023	9024	hy5-1_peak_657	22.8584	1	-39	1	52	2		0		1	52	1
Chr2	10033	10034	hy5-1_peak_658	59.2724	0		0		0		0		0		0
Chr2	175877	175878	hy5-1_peak_659	246.913	1	-14	1	17	2		0		1	16	1
Chr2	183467	183468	hy5-1_peak_660	54.5834	1	-59	2	5, 43	3		0		2	4, 43	2
Chr2	236724	236725	hy5-1_peak_661	28.7409	3	-53, -31, -4	1	141	4		1	-32	1	140	2
Chr2	256423	256424	hy5-1_peak_662	6.57254	1	-53	0		1		1	-53	0		1
Chr2	266546	266547	hy5-1_peak_663	302.092	1	-35	1	22	2		0		1	22	1
Chr2	274269	274270	hy5-1_peak_664	50.1101	1	-9	4	25, 33, 55, 153	5		1	-10	2	24, 32	3
Chr2	291822	291823	hy5-1_peak_665	31.9963	0		1	16	1		0		1	15	1
Chr2	383480	383481	hy5-1_peak_666	88.6055	0		2	112, 155	2		0		1	154	1
Chr2	422084	422085	hy5-1_peak_667	173.03	5	-117, -112, -43, -16, -11	2	2, 155	7		2	-44, -117	2	2, 155	4
Chr2	598819	598820	hy5-1_peak_668	9.13328	0		2	2, 120	2		0		2	119, 2	2
Chr2	710377	710378	hy5-1_peak_669	6.74446	0		1	77	1		0		0		0
Chr2	732791	732792	hy5-1_peak_670	7.57808	0		1	2	1		0		1	1	1
Chr2	761891	761892	hy5-1_peak_671	59.0331	1	-105	2	2, 22	3		1	-106	1	2	2
Chr2	801471	801472	hy5-1_peak_672	128.194	1	-33	2	5, 18	3		0		1	4	1
Chr2	834426	834427	hy5-1_peak_673	10.075	1	-64	2	13, 22	3		1	-65	1	21	2
Chr2	870268	870269	hy5-1_peak_674	62.9505	1	-178	1	11	2		0		0		0
Chr2	875676	875677	hy5-1_peak_675	58.0965	3	-176, -18, -12	1	172	4		1	-176	0		1
Chr2	909039	909040	hy5-1_peak_676	70.5155	2	-77, -12	1	83	3		2	-13, -77	1	83	3
Chr2	959850	959851	hy5-1_peak_677	24.072	3	-70, -22, -4	0		3		1	-23	0		1
Chr2	1018068	1018069	hy5-1_peak_678	7.50032	0		2	96, 120	2		0		2	95, 119	2
Chr2	1124268	1124269	hy5-1_peak_679	12.6871	0		5	1, 17, 83, 96, 149	5		0		3	16, 95, 1	3
Chr2	1136174	1136175	hy5-1_peak_680	299.937	0		0		0		0		0		0
Chr2	1185388	1185389	hy5-1_peak_681	34.0344	0		1	4	1		0		1	4	1
Chr2	1225634	1225635	hy5-1_peak_682	13.8477	1	-88	0		1		1	-88	0		1
Chr2	1289728	1289729	hy5-1_peak_683	349.658	1	-25	1	9	2		1	-25	0		1
Chr2	1321180	1321181	hy5-1_peak_684	28.9014	0		1	39	1		0		0		0
Chr2	1515731	1515732	hy5-1_peak_685	46.3173	3	-159, -49, -15	2	12, 129	5		2	-16, -49	1	11	3
Chr2	1604253	1604254	hy5-1_peak_686	10.075	2	-87, -11	3	22, 93, 111	5		1	-88	0		1
Chr2	1641486	1641487	hy5-1_peak_687	17.3048	0		2	5, 19	2		0		2	4, 18	2
Chr2	1851611	1851612	hy5-1_peak_688	8.516	0		2	24, 44	2		0		2	23, 43	2
Chr2	1966520	1966521	hy5-1_peak_689	10.859	2	-88, -8	1	5	3		1	-8	0		1
Chr2	1985855	1985856	hy5-1_peak_690	34.2159	0		1	4	1		0		1	3	1
Chr2	2122093	2122094	hy5-1_peak_691	15.709	2	-23, -10	1	12	3		2	-24, -11	1	11	3
Chr2	2184799	2184800	hy5-1_peak_692	11.4351	1	-53	1	7	2		1	-54	1	7	2
Chr2	2190121	2190122	hy5-1_peak_693	9.20391	2	-59, -4	1	148	3		2	-5, -59	0		2
Chr2	2289163	2289164	hy5-1_peak_694	13.9487	0		1	1	1		0		0		0
Chr2	2350076	2350077	hy5-1_peak_695	11.7982	1	-178	0		1		0		0		0
Chr2	2361783	2361784	hy5-1_peak_696	8.9404	1	-179	1	65	2		0		1	64	1
Chr2	2580054	2580055	hy5-1_peak_697	13.3859	0		0		0		0		0		0
Chr2	2902005	2902006	hy5-1_peak_698	13.1507	1	-48	2	22, 58	3		1	-49	0		1
Chr2	3061987	3061988	hy5-1_peak_699	28.6423	1	-147	4	12, 31, 91, 141	5		0		1	11	1
Chr2	3239938	3239939	hy5-1_peak_700	3.45854	1	-120	0		1		1	-120	0		1
Chr2	3351807	3351808	hy5-1_peak_701	9.68995	0		0		0		0		0		0
Chr2	3463749	3463750	hy5-1_peak_702	192.362	1	-7	0		1		0		0		0
Chr2	3495936	3495937	hy5-1_peak_703	8.94383	0		0		0		0		0		0
Chr2	3607138	3607139	hy5-1_peak_704	246.308	0		0		0		0		0		0
Chr2	3616825	3616826	hy5-1_peak_705	55.4524	0		0		0		0		0		0
Chr2	3619807	3619808	hy5-1_peak_706	28.2429	0		0		0		0		0		0
Chr2	3621696	3621697	hy5-1_peak_707	15.528	0		0		0		0		0		0
Chr2	3623444	3623445	hy5-1_peak_708	25.8724	0		0		0		0		0		0
Chr2	3626170	3626171	hy5-1_peak_709	96.2457	0		0		0		0		0		0
Chr2	3627011	3627012	hy5-1_peak_710	79.4617	0		0		0		0		0		0
Chr2	3655113	3655114	hy5-1_peak_711	16.6316	0		1	19	1		0		1	19	1
Chr2	3664299	3664300	hy5-1_peak_712	16.8595	0		0		0		0		0		0
Chr2	3718249	3718250	hy5-1_peak_713	153.559	0		0		0		0		0		0
Chr2	3896298	3896299	hy5-1_peak_714	16.9775	1	-10	1	74	2		1	-11	1	73	2
Chr2	4744163	4744164	hy5-1_peak_715	9.81372	0		2	4, 36	2		0		1	35	1
Chr2	5009866	5009867	hy5-1_peak_716	9.15504	1	-12	1	21	2		1	-13	1	21	2
Chr2	5200037	5200038	hy5-1_peak_717	13.8429	0		0		0		0		0		0
Chr2	5203303	5203304	hy5-1_peak_718	11.0763	1	-54	2	27, 42	3		1	-55	1	27	2
Chr2	5213093	5213094	hy5-1_peak_719	44.1684	2	-126, -76	2	4, 162	4		0		1	4	1
Chr2	5578733	5578734	hy5-1_peak_720	4.73027	0		0		0		0		0		0
Chr2	5606476	5606477	hy5-1_peak_721	326.64	1	-37	2	1, 26	3		1	-38	1	25	2
Chr2	6103694	6103695	hy5-1_peak_722	8.66231	2	-69, -42	1	5	3		0		1	4	1
Chr2	6175190	6175191	hy5-1_peak_723	8.53912	1	-18	0		1		1	-19	0		1
Chr2	6354185	6354186	hy5-1_peak_724	26.4682	1	-186	2	93, 148	3		1	-186	0		1
Chr2	6558385	6558386	hy5-1_peak_725	15.8767	1	-44	1	27	2		0		0		0
Chr2	6667602	6667603	hy5-1_peak_726	83.7926	2	-158, -110	3	13, 148, 191	5		2	-159, -110	1	148	3
Chr2	6711824	6711825	hy5-1_peak_727	124.944	1	-132	1	3	2		0		1	2	1
Chr2	6836535	6836536	hy5-1_peak_728	42.054	2	-84, -6	1	11	3		1	-85	1	10	2
Chr2	6946751	6946752	hy5-1_peak_729	7.42165	1	-16	1	185	2		1	-17	1	185	2
Chr2	6950023	6950024	hy5-1_peak_730	58.249	3	-191, -152, -6	1	6	4		1	-7	0		1
Chr2	7044804	7044805	hy5-1_peak_731	352.6	2	-157, -4	2	80, 145	4		1	-157	1	145	2
Chr2	7065612	7065613	hy5-1_peak_732	39.9895	0		2	4, 17	2		0		0		0
Chr2	7191115	7191116	hy5-1_peak_733	234.253	0		1	151	1		0		0		0
Chr2	7215677	7215678	hy5-1_peak_734	18.255	1	-73	2	13, 177	3		0		1	13	1
Chr2	7230242	7230243	hy5-1_peak_735	15.5582	1	-7	1	47	2		0		0		0
Chr2	7274341	7274342	hy5-1_peak_736	27.0176	0		2	5, 148	2		0		1	5	1
Chr2	7316956	7316957	hy5-1_peak_737	8.38184	1	-195	1	7	2		1	-196	1	6	2
Chr2	7604122	7604123	hy5-1_peak_738	10.1785	0		2	3, 8	2		0		2	3, 8	2
Chr2	7689523	7689524	hy5-1_peak_739	295.561	2	-39, -17	1	59	3		1	-18	1	58	2
Chr2	7757963	7757964	hy5-1_peak_740	16.6668	1	-20	0		1		1	-20	0		1
Chr2	7765313	7765314	hy5-1_peak_741	294.448	0		1	31	1		0		1	30	1
Chr2	7812953	7812954	hy5-1_peak_742	13.8477	2	-183, -121	2	10, 108	4		0		1	10	1
Chr2	7828852	7828853	hy5-1_peak_743	147.317	2	-56, -4	2	19, 32	4		0		1	31	1
Chr2	7845918	7845919	hy5-1_peak_744	75.6514	1	-138	2	7, 36	3		0		2	6, 35	2
Chr2	7935202	7935203	hy5-1_peak_745	148.974	1	-187	2	6, 28	3		0		2	5, 27	2
Chr2	7969213	7969214	hy5-1_peak_746	96.1791	2	-63, -10	2	9, 61	4		2	-64, -11	1	8	3
Chr2	7978987	7978988	hy5-1_peak_747	9.58001	0		0		0		0		0		0
Chr2	8010845	8010846	hy5-1_peak_748	25.5551	1	-4	2	10, 17	3		0		0		0
Chr2	8045124	8045125	hy5-1_peak_749	343.459	2	-31, -11	2	10, 84	4		2	-32, -12	1	9	3
Chr2	8063740	8063741	hy5-1_peak_750	7.51411	0		3	65, 86, 92	3		0		0		0
Chr2	8093903	8093904	hy5-1_peak_751	10.1785	1	-44	1	4	2		1	-45	1	4	2
Chr2	8107784	8107785	hy5-1_peak_752	421.249	2	-98, -25	2	116, 138	4		1	-99	2	115, 137	3
Chr2	8169421	8169422	hy5-1_peak_753	30.705	3	-135, -120, -7	2	25, 60	5		2	-8, -120	1	24	3
Chr2	8340210	8340211	hy5-1_peak_754	17.2134	1	-64	1	12	2		0		1	12	1
Chr2	8371179	8371180	hy5-1_peak_755	169.992	1	-9	2	14, 55	3		1	-10	2	14, 55	3
Chr2	8446960	8446961	hy5-1_peak_756	101.112	4	-195, -137, -47, -33	2	1, 14	6		1	-34	1	13	2
Chr2	8475413	8475414	hy5-1_peak_757	9.97332	0		3	25, 107, 142	3		0		2	24, 106	2
Chr2	8527177	8527178	hy5-1_peak_758	10.4979	0		1	4	1		0		1	4	1
Chr2	8544056	8544057	hy5-1_peak_759	309.816	3	-93, -37, -4	4	116, 136, 162, 182	7		3	-94, -38, -5	4	115, 135, 161, 181	7
Chr2	8588299	8588300	hy5-1_peak_760	31.8499	1	-21	1	47	2		1	-21	0		1
Chr2	8668471	8668472	hy5-1_peak_761	144.318	1	-15	2	8, 75	3		1	-16	0		1
Chr2	8710452	8710453	hy5-1_peak_762	6.93493	0		0		0		0		0		0
Chr2	8736642	8736643	hy5-1_peak_763	417.059	1	-11	3	30, 147, 181	4		1	-12	1	29	2
Chr2	8791876	8791877	hy5-1_peak_764	36.1381	4	-153, -83, -44, -10	1	63	5		2	-84, -11	1	63	3
Chr2	8913649	8913650	hy5-1_peak_765	21.471	1	-13	1	11	2		1	-13	1	11	2
Chr2	8945247	8945248	hy5-1_peak_766	22.4751	0		3	18, 31, 155	3		0		3	17, 31, 155	3
Chr2	8967522	8967523	hy5-1_peak_767	7.13906	0		1	50	1		0		0		0
Chr2	9026660	9026661	hy5-1_peak_768	163.985	1	-96	2	6, 186	3		0		0		0
Chr2	9120082	9120083	hy5-1_peak_769	8.63434	2	-74, -44	1	17	3		1	-45	1	16	2
Chr2	9171544	9171545	hy5-1_peak_770	193.192	1	-85	0		1		0		0		0
Chr2	9207210	9207211	hy5-1_peak_771	107.499	1	-27	3	57, 82, 115	4		1	-27	0		1
Chr2	9213157	9213158	hy5-1_peak_772	84.7329	3	-200, -48, -29	1	3	4		1	-48	1	2	2
Chr2	9233375	9233376	hy5-1_peak_773	11.9042	1	-61	1	42	2		1	-61	0		1
Chr2	9273760	9273761	hy5-1_peak_774	15.9339	1	-28	1	23	2		1	-29	0		1
Chr2	9303350	9303351	hy5-1_peak_775	32.0819	2	-183, -31	1	11	3		1	-31	1	10	2
Chr2	9357993	9357994	hy5-1_peak_776	310.814	1	-31	3	10, 71, 82	4		1	-32	2	10, 82	3
Chr2	9369445	9369446	hy5-1_peak_777	426.854	1	-20	4	10, 86, 100, 120	5		1	-21	2	99, 120	3
Chr2	9427884	9427885	hy5-1_peak_778	11.0933	2	-162, -5	1	65	3		1	-5	1	64	2
Chr2	9436528	9436529	hy5-1_peak_779	5.31218	1	-121	0		1		1	-122	0		1
Chr2	9454339	9454340	hy5-1_peak_780	19.726	3	-187, -165, -151	2	19, 40	5		3	-188, -166, -151	2	18, 39	5
Chr2	9530546	9530547	hy5-1_peak_781	50.7263	3	-170, -152, -5	0		3		1	-6	0		1
Chr2	9539159	9539160	hy5-1_peak_782	11.1195	2	-112, -35	1	15	3		2	-36, -112	1	14	3
Chr2	9563937	9563938	hy5-1_peak_783	42.4791	1	-51	2	1, 111	3		0		1	110	1
Chr2	9647229	9647230	hy5-1_peak_784	285.518	2	-188, -71	4	7, 63, 113, 151	6		2	-72, -188	2	112, 63	4
Chr2	9677631	9677632	hy5-1_peak_785	6.4127	2	-43, -24	4	17, 47, 154, 159	6		2	-44, -25	3	16, 46, 158	5
Chr2	9696833	9696834	hy5-1_peak_786	14.5472	2	-95, -8	1	35	3		2	-96, -9	0		2
Chr2	9817137	9817138	hy5-1_peak_787	52.9415	0		1	23	1		0		0		0
Chr2	9841990	9841991	hy5-1_peak_788	13.5006	2	-51, -23	0		2		2	-52, -23	0		2
Chr2	9866650	9866651	hy5-1_peak_789	17.6971	2	-35, -19	3	51, 104, 170	5		1	-20	2	50, 103	3
Chr2	9896445	9896446	hy5-1_peak_790	55.7009	1	-27	0		1		1	-27	0		1
Chr2	9955292	9955293	hy5-1_peak_791	8.55564	2	-134, -63	0		2		1	-63	0		1
Chr2	9963630	9963631	hy5-1_peak_792	18.6006	1	-116	1	2	2		1	-116	1	2	2
Chr2	9980689	9980690	hy5-1_peak_793	23.9224	1	-12	0		1		1	-12	0		1
Chr2	10036041	10036042	hy5-1_peak_794	134.545	1	-24	1	97	2		1	-25	1	96	2
Chr2	10057414	10057415	hy5-1_peak_795	120.123	1	-21	2	2, 150	3		1	-22	2	2, 150	3
Chr2	10069447	10069448	hy5-1_peak_796	37.6214	0		4	3, 11, 36, 186	4		0		2	10, 36	2
Chr2	10108075	10108076	hy5-1_peak_797	408.722	2	-40, -7	3	15, 30, 43	5		1	-41	2	42, 15	3
Chr2	10119640	10119641	hy5-1_peak_798	266.477	0		4	33, 63, 80, 99	4		0		4	32, 79, 63, 99	4
Chr2	10127616	10127617	hy5-1_peak_799	17.5516	0		3	17, 111, 117	3		0		1	116	1
Chr2	10170604	10170605	hy5-1_peak_800	234.503	0		0		0		0		0		0
Chr2	10244641	10244642	hy5-1_peak_801	39.3129	1	-7	2	37, 102	3		1	-8	1	37	2
Chr2	10267458	10267459	hy5-1_peak_802	32.1786	0		3	6, 24, 78	3		0		3	5, 77, 24	3
Chr2	10319816	10319817	hy5-1_peak_803	76.6256	1	-17	1	27	2		0		1	26	1
Chr2	10324908	10324909	hy5-1_peak_804	40.9204	3	-85, -69, -29	1	25	4		0		1	24	1
Chr2	10359638	10359639	hy5-1_peak_805	14.2092	1	-23	2	35, 64	3		0		2	34, 63	2
Chr2	10390978	10390979	hy5-1_peak_806	190.938	2	-184, -126	2	4, 37	4		0		1	4	1
Chr2	10433500	10433501	hy5-1_peak_807	14.4324	3	-163, -54, -9	0		3		0		0		0
Chr2	10445854	10445855	hy5-1_peak_808	13.9664	1	-7	1	154	2		1	-8	1	153	2
Chr2	10469326	10469327	hy5-1_peak_809	155.663	2	-200, -195	3	6, 15, 38	5		1	-200	3	14, 6, 38	4
Chr2	10561463	10561464	hy5-1_peak_810	13.3521	1	-47	0		1		0		0		0
Chr2	10567306	10567307	hy5-1_peak_811	61.2099	3	-170, -165, -132	2	8, 94	5		3	-171, -166, -133	0		3
Chr2	10657308	10657309	hy5-1_peak_812	25.2983	0		1	14	1		0		0		0
Chr2	10672494	10672495	hy5-1_peak_813	287.975	5	-171, -111, -46, -36, -6	0		5		3	-112, -7, -36	0		3
Chr2	10684049	10684050	hy5-1_peak_814	5.18399	0		2	8, 36	2		0		1	7	1
Chr2	10779122	10779123	hy5-1_peak_815	134.696	1	-12	2	11, 21	3		0		0		0
Chr2	10822306	10822307	hy5-1_peak_816	63.2217	0		1	5	1		0		1	4	1
Chr2	10863211	10863212	hy5-1_peak_817	55.1705	1	-17	2	7, 153	3		1	-18	1	6	2
Chr2	10872467	10872468	hy5-1_peak_818	8.9404	3	-179, -137, -93	1	7	4		1	-138	1	6	2
Chr2	10906132	10906133	hy5-1_peak_819	12.1205	1	-19	3	51, 57, 71	4		1	-19	1	51	2
Chr2	10991618	10991619	hy5-1_peak_820	32.9713	0		1	5	1		0		1	5	1
Chr2	11042792	11042793	hy5-1_peak_821	314.627	1	-151	1	61	2		1	-151	1	61	2
Chr2	11065951	11065952	hy5-1_peak_822	343.458	0		3	5, 103, 187	3		0		1	103	1
Chr2	11208488	11208489	hy5-1_peak_823	61.9558	1	-7	2	22, 172	3		0		2	171, 22	2
Chr2	11233466	11233467	hy5-1_peak_824	105.447	1	-36	2	3, 152	3		0		1	152	1
Chr2	11280559	11280560	hy5-1_peak_825	10.7187	0		1	64	1		0		1	63	1
Chr2	11298082	11298083	hy5-1_peak_826	250.534	1	-40	2	32, 63	3		1	-41	1	32	2
Chr2	11620939	11620940	hy5-1_peak_827	56.4013	1	-67	1	11	2		0		1	10	1
Chr2	11647674	11647675	hy5-1_peak_828	119.31	1	-4	0		1		0		0		0
Chr2	11682106	11682107	hy5-1_peak_829	136.541	1	-4	2	70, 158	3		0		2	157, 70	2
Chr2	11696685	11696686	hy5-1_peak_830	11.2884	0		0		0		0		0		0
Chr2	11704325	11704326	hy5-1_peak_831	16.0768	2	-46, -8	0		2		2	-9, -46	0		2
Chr2	11735772	11735773	hy5-1_peak_832	49.0332	1	-135	1	7	2		1	-135	1	7	2
Chr2	11779906	11779907	hy5-1_peak_833	27.4278	1	-162	1	1	2		0		0		0
Chr2	11871900	11871901	hy5-1_peak_834	9.70809	2	-143, -11	2	23, 43	4		0		1	43	1
Chr2	11961599	11961600	hy5-1_peak_835	91.7179	2	-48, -5	0		2		2	-49, -5	0		2
Chr2	11978094	11978095	hy5-1_peak_836	67.1047	0		3	99, 129, 167	3		0		1	98	1
Chr2	12023365	12023366	hy5-1_peak_837	167.169	0		1	111	1		0		1	111	1
Chr2	12101025	12101026	hy5-1_peak_838	11.8763	1	-17	0		1		1	-18	0		1
Chr2	12108292	12108293	hy5-1_peak_839	447.489	1	-20	1	3	2		1	-21	1	2	2
Chr2	12152366	12152367	hy5-1_peak_840	29.9841	2	-192, -4	3	23, 67, 100	5		2	-193, -5	2	22, 66	4
Chr2	12289567	12289568	hy5-1_peak_841	114.512	0		4	4, 132, 141, 174	4		0		0		0
Chr2	12296778	12296779	hy5-1_peak_842	36.828	0		0		0		0		0		0
Chr2	12326808	12326809	hy5-1_peak_843	12.1174	2	-60, -51	1	93	3		2	-52, -60	1	92	3
Chr2	12329168	12329169	hy5-1_peak_844	22.3185	0		1	10	1		0		1	10	1
Chr2	12343085	12343086	hy5-1_peak_845	216.703	3	-63, -33, -5	3	45, 69, 157	6		3	-34, -6, -63	2	68, 156	5
Chr2	12362142	12362143	hy5-1_peak_846	19.5346	2	-146, -12	0		2		0		0		0
Chr2	12388922	12388923	hy5-1_peak_847	16.1697	2	-76, -6	0		2		1	-6	0		1
Chr2	12418397	12418398	hy5-1_peak_848	182.064	4	-110, -71, -41, -32	1	7	5		3	-42, -33, -110	1	7	4
Chr2	12428804	12428805	hy5-1_peak_849	141.579	0		0		0		0		0		0
Chr2	12454446	12454447	hy5-1_peak_850	7.18903	0		1	1	1		0		0		0
Chr2	12618941	12618942	hy5-1_peak_851	138.86	0		1	5	1		0		0		0
Chr2	12633468	12633469	hy5-1_peak_852	6.79607	1	-20	3	7, 100, 132	4		1	-21	3	6, 99, 131	4
Chr2	12642432	12642433	hy5-1_peak_853	55.1538	0		0		0		0		0		0
Chr2	12666898	12666899	hy5-1_peak_854	13.5006	2	-53, -39	1	29	3		1	-40	1	28	2
Chr2	12680225	12680226	hy5-1_peak_855	28.5861	3	-166, -52, -27	1	91	4		1	-28	1	91	2
Chr2	12707911	12707912	hy5-1_peak_856	86.941	1	-7	1	79	2		1	-8	1	79	2
Chr2	12712937	12712938	hy5-1_peak_857	7.0958	1	-16	1	118	2		1	-17	0		1
Chr2	12767672	12767673	hy5-1_peak_858	9.39091	1	-84	1	9	2		0		1	8	1
Chr2	12822076	12822077	hy5-1_peak_859	8.35934	2	-177, -17	5	29, 59, 89, 104, 195	7		1	-178	3	58, 194, 29	4
Chr2	12885593	12885594	hy5-1_peak_860	12.2306	1	-8	1	60	2		1	-9	0		1
Chr2	12897244	12897245	hy5-1_peak_861	9.68009	1	-4	0		1		1	-5	0		1
Chr2	12939263	12939264	hy5-1_peak_862	49.0403	2	-68, -4	0		2		1	-68	0		1
Chr2	12973614	12973615	hy5-1_peak_863	18.5698	1	-7	1	176	2		1	-7	0		1
Chr2	13136448	13136449	hy5-1_peak_864	23.1984	0		1	27	1		0		0		0
Chr2	13172266	13172267	hy5-1_peak_865	10.0527	0		1	19	1		0		1	19	1
Chr2	13221366	13221367	hy5-1_peak_866	26.4415	0		2	31, 76	2		0		1	76	1
Chr2	13307781	13307782	hy5-1_peak_867	61.4599	1	-26	3	4, 73, 191	4		1	-27	2	72, 191	3
Chr2	13648214	13648215	hy5-1_peak_868	8.16235	1	-111	2	46, 140	3		1	-112	2	45, 139	3
Chr2	13726757	13726758	hy5-1_peak_869	27.922	0		1	3	1		0		1	3	1
Chr2	13765522	13765523	hy5-1_peak_870	15.1281	0		2	8, 43	2		0		2	7, 42	2
Chr2	13780808	13780809	hy5-1_peak_871	3.76201	0		1	98	1		0		0		0
Chr2	13800417	13800418	hy5-1_peak_872	137.24	4	-87, -46, -37, -14	3	113, 131, 155	7		2	-87, -14	1	131	3
Chr2	14021731	14021732	hy5-1_peak_873	51.9108	2	-164, -32	1	13	3		1	-33	1	12	2
Chr2	14031507	14031508	hy5-1_peak_874	173.225	0		3	5, 11, 165	3		0		1	4	1
Chr2	14066387	14066388	hy5-1_peak_875	17.6971	0		1	20	1		0		1	19	1
Chr2	14146536	14146537	hy5-1_peak_876	41.1412	1	-76	3	1, 83, 153	4		0		3	82, 1, 153	3
Chr2	14196669	14196670	hy5-1_peak_877	17.6971	0		0		0		0		0		0
Chr2	14253323	14253324	hy5-1_peak_878	13.7307	1	-12	0		1		1	-13	0		1
Chr2	14288833	14288834	hy5-1_peak_879	54.8754	1	-55	1	147	2		1	-55	0		1
Chr2	14524448	14524449	hy5-1_peak_880	98.6702	2	-82, -5	2	37, 57	4		1	-5	2	36, 56	3
Chr2	14536454	14536455	hy5-1_peak_881	201.287	2	-155, -24	1	1	3		1	-156	0		1
Chr2	14552880	14552881	hy5-1_peak_882	316.306	2	-56, -35	2	63, 110	4		0		1	62	1
Chr2	14645665	14645666	hy5-1_peak_883	14.2092	1	-19	3	13, 40, 68	4		1	-19	0		1
Chr2	14696196	14696197	hy5-1_peak_884	5.6987	1	-200	3	49, 124, 151	4		1	-200	2	48, 123	3
Chr2	14697016	14697017	hy5-1_peak_885	11.3753	1	-32	1	1	2		0		0		0
Chr2	14750658	14750659	hy5-1_peak_886	12.5883	1	-194	2	111, 158	3		1	-195	2	110, 157	3
Chr2	14752408	14752409	hy5-1_peak_887	33.3365	1	-145	4	21, 44, 68, 186	5		1	-146	2	20, 67	3
Chr2	14795289	14795290	hy5-1_peak_888	56.7674	1	-141	1	117	2		0		1	116	1
Chr2	14908170	14908171	hy5-1_peak_889	7.35446	1	-42	2	117, 157	3		1	-43	1	116	2
Chr2	14945589	14945590	hy5-1_peak_890	7.05225	2	-151, -12	2	31, 115	4		2	-151, -12	0		2
Chr2	15060335	15060336	hy5-1_peak_891	38.1022	2	-53, -5	1	33	3		0		0		0
Chr2	15066347	15066348	hy5-1_peak_892	33.8443	2	-132, -24	3	10, 80, 166	5		2	-132, -24	3	9, 79, 165	5
Chr2	15073328	15073329	hy5-1_peak_893	19.8197	0		1	19	1		0		1	18	1
Chr2	15127836	15127837	hy5-1_peak_894	447.33	2	-97, -60	3	5, 27, 55	5		1	-61	3	4, 26, 55	4
Chr2	15154029	15154030	hy5-1_peak_895	45.3483	0		2	9, 42	2		0		0		0
Chr2	15168490	15168491	hy5-1_peak_896	227.635	1	-72	0		1		0		0		0
Chr2	15185489	15185490	hy5-1_peak_897	10.7187	1	-24	0		1		1	-24	0		1
Chr2	15193481	15193482	hy5-1_peak_898	48.6485	0		3	9, 25, 184	3		0		2	9, 184	2
Chr2	15262283	15262284	hy5-1_peak_899	8.97927	1	-4	1	10	2		0		0		0
Chr2	15286086	15286087	hy5-1_peak_900	17.8984	0		1	2	1		0		1	1	1
Chr2	15291178	15291179	hy5-1_peak_901	96.8743	0		2	6, 75	2		0		1	5	1
Chr2	15299937	15299938	hy5-1_peak_902	127.092	1	-87	1	19	2		0		0		0
Chr2	15337315	15337316	hy5-1_peak_903	20.0575	1	-14	1	7	2		0		1	7	1
Chr2	15338565	15338566	hy5-1_peak_904	96.2587	1	-32	1	9	2		0		1	8	1
Chr2	15358721	15358722	hy5-1_peak_905	138.514	1	-32	2	32, 44	3		1	-32	2	43, 32	3
Chr2	15425101	15425102	hy5-1_peak_906	16.2023	1	-11	1	2	2		0		0		0
Chr2	15564720	15564721	hy5-1_peak_907	53.9016	0		1	1	1		0		0		0
Chr2	15616392	15616393	hy5-1_peak_908	30.843	2	-187, -112	2	11, 71	4		1	-188	2	10, 70	3
Chr2	15641867	15641868	hy5-1_peak_909	9.58001	2	-184, -47	2	1, 58	4		2	-48, -184	1	57	3
Chr2	15661913	15661914	hy5-1_peak_910	20.7371	1	-137	2	6, 60	3		0		2	5, 60	2
Chr2	15736681	15736682	hy5-1_peak_911	47.4878	0		0		0		0		0		0
Chr2	15737746	15737747	hy5-1_peak_912	14.0499	0		1	10	1		0		1	9	1
Chr2	15771819	15771820	hy5-1_peak_913	245.946	1	-183	1	134	2		0		0		0
Chr2	15797049	15797050	hy5-1_peak_914	163.566	0		1	1	1		0		0		0
Chr2	15859177	15859178	hy5-1_peak_915	51.8949	1	-20	0		1		1	-21	0		1
Chr2	15883602	15883603	hy5-1_peak_916	10.649	1	-11	0		1		0		0		0
Chr2	15921416	15921417	hy5-1_peak_917	7.22729	2	-33, -7	1	168	3		2	-34, -8	1	168	3
Chr2	15945897	15945898	hy5-1_peak_918	17.8433	7	-153, -147, -90, -86, -68, -54, -19	1	61	8		1	-68	0		1
Chr2	16028839	16028840	hy5-1_peak_919	7.50032	1	-10	1	4	2		1	-11	1	4	2
Chr2	16050629	16050630	hy5-1_peak_920	171.38	2	-93, -69	2	106, 160	4		1	-70	0		1
Chr2	16106884	16106885	hy5-1_peak_921	7.59408	0		3	49, 60, 83	3		0		3	48, 60, 83	3
Chr2	16113122	16113123	hy5-1_peak_922	12.0116	2	-197, -59	0		2		2	-60, -197	0		2
Chr2	16221738	16221739	hy5-1_peak_923	106.499	2	-135, -32	2	9, 22	4		2	-136, -33	2	8, 21	4
Chr2	16234891	16234892	hy5-1_peak_924	334.84	2	-27, -6	0		2		0		0		0
Chr2	16244604	16244605	hy5-1_peak_925	72.3077	1	-16	3	8, 15, 43	4		1	-17	3	7, 14, 42	4
Chr2	16336309	16336310	hy5-1_peak_926	5.47291	1	-15	3	13, 35, 183	4		1	-16	2	12, 34	3
Chr2	16390636	16390637	hy5-1_peak_927	51.2892	1	-5	2	22, 144	3		1	-6	0		1
Chr2	16452492	16452493	hy5-1_peak_928	143.699	0		1	7	1		0		0		0
Chr2	16458129	16458130	hy5-1_peak_929	21.0594	1	-10	1	158	2		0		0		0
Chr2	16473963	16473964	hy5-1_peak_930	20.8103	2	-31, -12	2	23, 49	4		1	-13	2	22, 48	3
Chr2	16547734	16547735	hy5-1_peak_931	228.517	1	-66	1	11	2		1	-66	1	10	2
Chr2	16562935	16562936	hy5-1_peak_932	16.5388	1	-40	2	17, 114	3		0		1	16	1
Chr2	16603360	16603361	hy5-1_peak_933	124.697	0		1	20	1		0		0		0
Chr2	16642584	16642585	hy5-1_peak_934	82.5455	1	-65	1	3	2		0		1	2	1
Chr2	16689322	16689323	hy5-1_peak_935	73.4041	1	-103	0		1		1	-104	0		1
Chr2	16706109	16706110	hy5-1_peak_936	20.6139	2	-85, -18	2	29, 64	4		2	-86, -19	2	28, 63	4
Chr2	16745067	16745068	hy5-1_peak_937	18.7672	1	-12	1	11	2		0		0		0
Chr2	16746404	16746405	hy5-1_peak_938	44.4033	0		2	16, 28	2		0		1	27	1
Chr2	16780407	16780408	hy5-1_peak_939	382.385	4	-67, -42, -35, -5	2	18, 31	6		2	-6, -67	1	31	3
Chr2	16804185	16804186	hy5-1_peak_940	7.52458	0		3	16, 49, 80	3		0		3	48, 79, 16	3
Chr2	16845416	16845417	hy5-1_peak_941	357.658	3	-131, -122, -105	2	2, 116	5		1	-106	2	115, 2	3
Chr2	16850556	16850557	hy5-1_peak_942	25.3775	0		2	2, 162	2		0		1	2	1
Chr2	16852865	16852866	hy5-1_peak_943	49.4686	0		1	17	1		0		0		0
Chr2	16888279	16888280	hy5-1_peak_944	18.153	0		1	6	1		0		0		0
Chr2	16898444	16898445	hy5-1_peak_945	27.9956	2	-85, -12	2	10, 100	4		1	-13	2	10, 100	3
Chr2	16912776	16912777	hy5-1_peak_946	280.69	1	-20	3	10, 21, 73	4		1	-20	1	20	2
Chr2	16949083	16949084	hy5-1_peak_947	223.503	1	-5	1	90	2		1	-6	1	89	2
Chr2	17069390	17069391	hy5-1_peak_948	60.0942	0		0		0		0		0		0
Chr2	17075792	17075793	hy5-1_peak_949	6.46271	0		2	30, 85	2		0		1	85	1
Chr2	17097984	17097985	hy5-1_peak_950	23.941	0		3	8, 89, 184	3		0		1	8	1
Chr2	17116746	17116747	hy5-1_peak_951	32.9713	2	-135, -4	0		2		0		0		0
Chr2	17143496	17143497	hy5-1_peak_952	22.3324	1	-8	1	135	2		0		0		0
Chr2	17159917	17159918	hy5-1_peak_953	176.361	2	-53, -42	0		2		2	-54, -43	0		2
Chr2	17164493	17164494	hy5-1_peak_954	11.9042	0		3	14, 51, 138	3		0		2	137, 51	2
Chr2	17170458	17170459	hy5-1_peak_955	22.5647	0		1	1	1		0		1	1	1
Chr2	17189818	17189819	hy5-1_peak_956	19.5895	0		0		0		0		0		0
Chr2	17199968	17199969	hy5-1_peak_957	13.9664	2	-120, -20	2	11, 66	4		1	-20	1	10	2
Chr2	17225364	17225365	hy5-1_peak_958	129.995	0		2	61, 103	2		0		2	60, 102	2
Chr2	17301621	17301622	hy5-1_peak_959	108.698	0		1	12	1		0		1	12	1
Chr2	17368572	17368573	hy5-1_peak_960	90.6495	0		2	5, 106	2		0		2	4, 106	2
Chr2	17388603	17388604	hy5-1_peak_961	37.3611	0		2	4, 33	2		0		1	32	1
Chr2	17403247	17403248	hy5-1_peak_962	348.287	2	-120, -10	2	10, 16	4		1	-10	2	9, 16	3
Chr2	17436265	17436266	hy5-1_peak_963	23.7895	3	-143, -32, -26	1	9	4		0		1	8	1
Chr2	17473053	17473054	hy5-1_peak_964	113.035	1	-10	3	36, 95, 109	4		1	-10	3	35, 94, 108	4
Chr2	17512944	17512945	hy5-1_peak_965	4.4572	0		1	95	1		0		0		0
Chr2	17639513	17639514	hy5-1_peak_966	23.0744	2	-51, -14	4	12, 93, 102, 119	6		1	-51	4	92, 101, 118, 12	5
Chr2	17641298	17641299	hy5-1_peak_967	10.9559	0		2	3, 20	2		0		2	2, 19	2
Chr2	17664982	17664983	hy5-1_peak_968	105.266	2	-153, -5	1	14	3		1	-153	1	14	2
Chr2	17717026	17717027	hy5-1_peak_969	39.4982	1	-23	2	82, 104	3		1	-23	2	81, 103	3
Chr2	17718090	17718091	hy5-1_peak_970	12.412	2	-130, -9	2	54, 111	4		1	-10	0		1
Chr2	17728949	17728950	hy5-1_peak_971	269.838	1	-10	1	52	2		0		1	51	1
Chr2	17752384	17752385	hy5-1_peak_972	437.776	5	-159, -98, -66, -60, -10	2	67, 89	7		3	-99, -61, -159	2	66, 88	5
Chr2	17793255	17793256	hy5-1_peak_973	75.7699	1	-102	0		1		1	-103	0		1
Chr2	17796123	17796124	hy5-1_peak_974	15.8637	3	-142, -54, -11	0		3		2	-54, -11	0		2
Chr2	17806070	17806071	hy5-1_peak_975	24.8246	1	-179	2	14, 56	3		1	-179	2	13, 55	3
Chr2	17845093	17845094	hy5-1_peak_976	23.8332	1	-11	0		1		1	-12	0		1
Chr2	17862987	17862988	hy5-1_peak_977	5.78112	1	-128	1	116	2		0		1	115	1
Chr2	17891022	17891023	hy5-1_peak_978	26.5236	2	-192, -14	4	15, 32, 62, 92	6		1	-14	2	31, 91	3
Chr2	17906838	17906839	hy5-1_peak_979	73.9482	1	-7	4	32, 69, 131, 145	5		1	-8	2	144, 131	3
Chr2	17910713	17910714	hy5-1_peak_980	13.1714	1	-75	1	5	2		1	-76	0		1
Chr2	17926515	17926516	hy5-1_peak_981	368.536	2	-133, -33	2	8, 30	4		0		2	7, 29	2
Chr2	17976006	17976007	hy5-1_peak_982	19.5895	0		1	71	1		0		1	71	1
Chr2	18021135	18021136	hy5-1_peak_983	5.8284	0		1	48	1		0		1	47	1
Chr2	18052940	18052941	hy5-1_peak_984	23.4907	2	-66, -21	1	174	3		1	-67	1	174	2
Chr2	18081554	18081555	hy5-1_peak_985	130.123	1	-37	1	2	2		1	-37	1	1	2
Chr2	18143527	18143528	hy5-1_peak_986	53.4491	1	-7	2	34, 161	3		1	-8	0		1
Chr2	18167470	18167471	hy5-1_peak_987	12.6983	2	-90, -27	3	23, 43, 119	5		1	-90	0		1
Chr2	18175125	18175126	hy5-1_peak_988	33.7033	0		2	1, 129	2		0		2	128, 1	2
Chr2	18303921	18303922	hy5-1_peak_989	371.831	0		1	73	1		0		1	73	1
Chr2	18363707	18363708	hy5-1_peak_990	225.25	0		2	3, 74	2		0		2	2, 73	2
Chr2	18372755	18372756	hy5-1_peak_991	105.372	1	-32	2	17, 33	3		1	-32	1	33	2
Chr2	18400969	18400970	hy5-1_peak_992	18.6121	0		2	11, 49	2		0		2	10, 49	2
Chr2	18423196	18423197	hy5-1_peak_993	99.3752	1	-19	2	84, 133	3		1	-20	2	83, 132	3
Chr2	18479400	18479401	hy5-1_peak_994	243.496	3	-141, -78, -58	2	50, 79	5		3	-142, -79, -59	1	78	4
Chr2	18536148	18536149	hy5-1_peak_995	30.5197	4	-142, -98, -59, -53	1	194	5		1	-59	1	193	2
Chr2	18557094	18557095	hy5-1_peak_996	24.0946	0		1	1	1		0		0		0
Chr2	18563922	18563923	hy5-1_peak_997	94.1841	1	-28	0		1		1	-28	0		1
Chr2	18578034	18578035	hy5-1_peak_998	206.156	4	-181, -131, -54, -11	3	32, 68, 85	7		2	-55, -11	2	84, 32	4
Chr2	18583928	18583929	hy5-1_peak_999	56.5617	1	-4	5	2, 13, 41, 80, 156	6		0		3	1, 40, 13	3
Chr2	18624200	18624201	hy5-1_peak_1000	73.2107	2	-135, -4	2	16, 59	4		0		1	15	1
Chr2	18672267	18672268	hy5-1_peak_1001	10.9661	2	-19, -7	0		2		2	-20, -7	0		2
Chr2	18699284	18699285	hy5-1_peak_1002	8.4452	2	-78, -25	2	33, 133	4		2	-79, -26	1	32	3
Chr2	18717459	18717460	hy5-1_peak_1003	9.21654	1	-15	3	76, 84, 191	4		1	-16	2	75, 191	3
Chr2	18728220	18728221	hy5-1_peak_1004	27.7498	1	-101	4	10, 50, 91, 155	5		1	-102	1	50	2
Chr2	18790503	18790504	hy5-1_peak_1005	48.732	2	-200, -8	4	48, 110, 132, 143	6		2	-9, -200	3	109, 142, 132	5
Chr2	18796022	18796023	hy5-1_peak_1006	16.9775	1	-92	2	43, 61	3		1	-92	1	42	2
Chr2	18833168	18833169	hy5-1_peak_1007	59.3028	2	-130, -12	3	17, 47, 53	5		2	-131, -13	2	16, 52	4
Chr2	18845160	18845161	hy5-1_peak_1008	110.858	2	-129, -117	2	8, 14	4		0		1	8	1
Chr2	18864863	18864864	hy5-1_peak_1009	92.2761	1	-52	0		1		1	-53	0		1
Chr2	18893933	18893934	hy5-1_peak_1010	135.845	1	-78	2	2, 102	3		1	-79	2	1, 101	3
Chr2	18913234	18913235	hy5-1_peak_1011	202.558	1	-102	2	7, 142	3		1	-103	2	6, 142	3
Chr2	18978051	18978052	hy5-1_peak_1012	154.177	4	-176, -156, -41, -9	2	178, 183	6		2	-177, -157	1	182	3
Chr2	18981456	18981457	hy5-1_peak_1013	17.1942	3	-76, -45, -6	0		3		3	-77, -46, -6	0		3
Chr2	18999151	18999152	hy5-1_peak_1014	115.085	2	-123, -92	2	5, 144	4		2	-124, -93	1	143	3
Chr2	19000167	19000168	hy5-1_peak_1015	141.489	1	-98	2	4, 16	3		1	-99	2	3, 16	3
Chr2	19007931	19007932	hy5-1_peak_1016	140.82	1	-6	1	174	2		1	-7	1	173	2
Chr2	19052063	19052064	hy5-1_peak_1017	11.7982	1	-155	3	8, 76, 102	4		1	-155	2	7, 101	3
Chr2	19057342	19057343	hy5-1_peak_1018	13.9664	0		3	6, 36, 167	3		0		0		0
Chr2	19095898	19095899	hy5-1_peak_1019	31.577	3	-43, -12, -5	1	186	4		3	-44, -13, -6	0		3
Chr2	19109485	19109486	hy5-1_peak_1020	13.5006	1	-15	0		1		1	-15	0		1
Chr2	19145711	19145712	hy5-1_peak_1021	172.196	2	-37, -10	3	18, 48, 181	5		2	-38, -11	3	17, 47, 180	5
Chr2	19221211	19221212	hy5-1_peak_1022	313.11	1	-111	2	7, 40	3		1	-112	2	7, 40	3
Chr2	19232469	19232470	hy5-1_peak_1023	88.6732	2	-106, -34	1	58	3		2	-107, -35	1	57	3
Chr2	19243567	19243568	hy5-1_peak_1024	6.4821	2	-45, -36	0		2		1	-37	0		1
Chr2	19265933	19265934	hy5-1_peak_1025	23.6342	0		1	1	1		0		0		0
Chr2	19306563	19306564	hy5-1_peak_1026	36.4176	2	-197, -7	2	13, 105	4		2	-198, -8	1	12	3
Chr2	19310107	19310108	hy5-1_peak_1027	12.0218	1	-35	1	19	2		1	-35	0		1
Chr2	19352729	19352730	hy5-1_peak_1028	9.86407	2	-64, -33	2	29, 143	4		1	-34	0		1
Chr2	19374532	19374533	hy5-1_peak_1029	96.4817	0		0		0		0		0		0
Chr2	19386773	19386774	hy5-1_peak_1030	345.743	2	-51, -7	0		2		2	-51, -7	0		2
Chr2	19408700	19408701	hy5-1_peak_1031	191.93	3	-78, -53, -5	0		3		2	-54, -6	0		2
Chr2	19468156	19468157	hy5-1_peak_1032	329.817	0		2	29, 121	2		0		1	29	1
Chr2	19476086	19476087	hy5-1_peak_1033	8.75037	3	-107, -99, -22	2	100, 123	5		1	-100	2	122, 100	3
Chr2	19481362	19481363	hy5-1_peak_1034	74.6772	1	-62	2	4, 71	3		1	-63	1	3	2
Chr2	19511849	19511850	hy5-1_peak_1035	249.264	0		2	6, 27	2		0		2	5, 26	2
Chr2	19536677	19536678	hy5-1_peak_1036	12.2245	1	-12	2	11, 168	3		0		1	11	1
Chr2	19544267	19544268	hy5-1_peak_1037	116.925	1	-27	1	31	2		0		1	30	1
Chr2	19556140	19556141	hy5-1_peak_1038	18.2425	2	-177, -6	0		2		1	-6	0		1
Chr2	19560639	19560640	hy5-1_peak_1039	43.2556	2	-175, -20	4	3, 66, 125, 188	6		1	-21	2	124, 3	3
Chr2	19568525	19568526	hy5-1_peak_1040	173.401	1	-61	2	19, 167	3		1	-62	1	18	2
Chr2	19583720	19583721	hy5-1_peak_1041	49.1501	0		0		0		0		0		0
Chr2	19698137	19698138	hy5-1_peak_1042	194.168	0		0		0		0		0		0
Chr3	18879	18880	hy5-1_peak_1043	99.0391	0		3	4, 36, 99	3		0		2	3, 36	2
Chr3	132190	132191	hy5-1_peak_1044	275.581	4	-154, -134, -29, -15	2	7, 86	6		2	-29, -15	1	6	3
Chr3	164346	164347	hy5-1_peak_1045	13.7307	3	-45, -12, -7	1	91	4		1	-8	0		1
Chr3	204463	204464	hy5-1_peak_1046	22.2145	3	-186, -138, -18	3	53, 78, 100	6		3	-187, -138, -18	3	77, 99, 53	6
Chr3	209107	209108	hy5-1_peak_1047	14.8145	0		1	2	1		0		1	2	1
Chr3	222909	222910	hy5-1_peak_1048	275.245	2	-142, -10	1	4	3		1	-11	1	4	2
Chr3	256771	256772	hy5-1_peak_1049	17.0943	1	-7	2	109, 163	3		0		1	163	1
Chr3	302093	302094	hy5-1_peak_1050	377.511	1	-8	1	16	2		1	-8	1	16	2
Chr3	325288	325289	hy5-1_peak_1051	39.7945	0		0		0		0		0		0
Chr3	350086	350087	hy5-1_peak_1052	21.1122	0		0		0		0		0		0
Chr3	386958	386959	hy5-1_peak_1053	189.581	3	-65, -37, -5	3	12, 44, 92	6		2	-66, -6	2	43, 12	4
Chr3	476908	476909	hy5-1_peak_1054	13.8541	0		1	5	1		0		1	4	1
Chr3	484233	484234	hy5-1_peak_1055	33.2119	0		1	21	1		0		0		0
Chr3	512205	512206	hy5-1_peak_1056	45.1442	2	-62, -21	3	32, 45, 63	5		2	-63, -22	3	31, 44, 62	5
Chr3	538284	538285	hy5-1_peak_1057	36.6348	2	-199, -9	1	36	3		2	-200, -10	1	35	3
Chr3	546780	546781	hy5-1_peak_1058	13.6148	1	-9	0		1		1	-9	0		1
Chr3	622768	622769	hy5-1_peak_1059	19.1808	0		2	12, 78	2		0		2	12, 78	2
Chr3	669574	669575	hy5-1_peak_1060	39.7945	1	-141	3	6, 120, 128	4		0		1	5	1
Chr3	757439	757440	hy5-1_peak_1061	32.3978	1	-51	0		1		0		0		0
Chr3	765697	765698	hy5-1_peak_1062	8.53912	3	-129, -106, -48	2	91, 110	5		1	-49	1	109	2
Chr3	812326	812327	hy5-1_peak_1063	338.578	2	-47, -29	2	3, 15	4		0		0		0
Chr3	880487	880488	hy5-1_peak_1064	79.3139	0		0		0		0		0		0
Chr3	907392	907393	hy5-1_peak_1065	84.8447	2	-198, -8	2	10, 24	4		1	-9	2	10, 24	3
Chr3	910437	910438	hy5-1_peak_1066	105.617	1	-61	1	58	2		0		1	57	1
Chr3	961518	961519	hy5-1_peak_1067	269.763	2	-63, -10	0		2		2	-11, -63	0		2
Chr3	1127866	1127867	hy5-1_peak_1068	33.1037	1	-10	2	12, 28	3		0		1	27	1
Chr3	1159827	1159828	hy5-1_peak_1069	61.6454	1	-8	1	43	2		1	-9	0		1
Chr3	1186424	1186425	hy5-1_peak_1070	378.693	1	-52	2	9, 37	3		1	-52	1	9	2
Chr3	1231605	1231606	hy5-1_peak_1071	172.496	4	-176, -140, -134, -30	2	11, 52	6		2	-177, -141	1	11	3
Chr3	1353221	1353222	hy5-1_peak_1072	11.1855	1	-20	0		1		1	-21	0		1
Chr3	1408559	1408560	hy5-1_peak_1073	7.59408	1	-19	1	3	2		0		0		0
Chr3	1499082	1499083	hy5-1_peak_1074	417.953	2	-26, -19	2	4, 46	4		2	-20, -26	2	45, 4	4
Chr3	1585111	1585112	hy5-1_peak_1075	11.0751	0		1	25	1		0		0		0
Chr3	1598425	1598426	hy5-1_peak_1076	62.6821	0		0		0		0		0		0
Chr3	1635071	1635072	hy5-1_peak_1077	9.7715	1	-8	3	15, 60, 161	4		0		2	15, 60	2
Chr3	1642967	1642968	hy5-1_peak_1078	63.3205	3	-125, -95, -14	1	7	4		1	-95	0		1
Chr3	1684809	1684810	hy5-1_peak_1079	59.7692	4	-174, -47, -22, -7	1	18	5		0		1	17	1
Chr3	1723628	1723629	hy5-1_peak_1080	16.6873	0		1	92	1		0		1	91	1
Chr3	1796042	1796043	hy5-1_peak_1081	22.7807	1	-10	0		1		1	-11	0		1
Chr3	1898193	1898194	hy5-1_peak_1082	12.95	2	-175, -147	2	7, 28	4		2	-148, -175	0		2
Chr3	1959483	1959484	hy5-1_peak_1083	64.1084	1	-35	0		1		1	-36	0		1
Chr3	1984769	1984770	hy5-1_peak_1084	59.8698	2	-104, -5	0		2		2	-105, -6	0		2
Chr3	1990351	1990352	hy5-1_peak_1085	6.4821	3	-70, -40, -15	0		3		0		0		0
Chr3	2008597	2008598	hy5-1_peak_1086	9.01055	2	-144, -70	2	57, 69	4		1	-71	2	56, 69	3
Chr3	2011690	2011691	hy5-1_peak_1087	34.3823	2	-193, -37	1	9	3		1	-193	1	8	2
Chr3	2056112	2056113	hy5-1_peak_1088	104.654	0		1	8	1		0		1	8	1
Chr3	2100883	2100884	hy5-1_peak_1089	14.9137	1	-14	2	36, 86	3		1	-15	1	36	2
Chr3	2131065	2131066	hy5-1_peak_1090	94.3571	1	-8	1	29	2		1	-9	1	28	2
Chr3	2143465	2143466	hy5-1_peak_1091	223.872	4	-95, -63, -43, -10	0		4		4	-96, -64, -44, -10	0		4
Chr3	2155842	2155843	hy5-1_peak_1092	33.2317	3	-194, -163, -13	2	166, 176	5		1	-194	2	166, 176	3
Chr3	2161804	2161805	hy5-1_peak_1093	49.2044	0		2	16, 57	2		0		1	56	1
Chr3	2264368	2264369	hy5-1_peak_1094	12.1643	0		1	10	1		0		1	9	1
Chr3	2308693	2308694	hy5-1_peak_1095	47.2116	3	-39, -30, -9	1	29	4		3	-40, -31, -10	1	28	4
Chr3	2343237	2343238	hy5-1_peak_1096	50.0406	1	-4	0		1		0		0		0
Chr3	2348954	2348955	hy5-1_peak_1097	54.6526	1	-50	4	5, 18, 23, 161	5		1	-50	3	17, 160, 5	4
Chr3	2354648	2354649	hy5-1_peak_1098	135.008	3	-166, -132, -64	1	179	4		3	-166, -132, -64	0		3
Chr3	2394384	2394385	hy5-1_peak_1099	79.7014	2	-132, -30	1	47	3		1	-31	0		1
Chr3	2455162	2455163	hy5-1_peak_1100	330.228	3	-143, -52, -11	2	44, 86	5		2	-144, -11	1	43	3
Chr3	2534795	2534796	hy5-1_peak_1101	52.9018	1	-10	1	14	2		0		1	13	1
Chr3	2543135	2543136	hy5-1_peak_1102	12.5881	1	-156	2	5, 135	3		0		1	4	1
Chr3	2551024	2551025	hy5-1_peak_1103	44.4976	0		2	7, 50	2		0		1	6	1
Chr3	2564823	2564824	hy5-1_peak_1104	20.239	1	-109	1	1	2		1	-110	1	1	2
Chr3	2573022	2573023	hy5-1_peak_1105	30.3751	1	-5	5	7, 12, 36, 54, 85	6		0		1	7	1
Chr3	2627640	2627641	hy5-1_peak_1106	26.4682	1	-41	2	9, 56	3		0		2	8, 55	2
Chr3	2667500	2667501	hy5-1_peak_1107	303.514	2	-137, -14	1	53	3		0		1	53	1
Chr3	2828195	2828196	hy5-1_peak_1108	15.3665	3	-151, -66, -4	1	73	4		2	-67, -5	1	73	3
Chr3	2930892	2930893	hy5-1_peak_1109	147.365	1	-9	1	79	2		1	-9	1	79	2
Chr3	2945298	2945299	hy5-1_peak_1110	5.54844	3	-167, -92, -16	3	40, 54, 128	6		2	-168, -16	3	53, 127, 40	5
Chr3	3000939	3000940	hy5-1_peak_1111	145.847	0		3	26, 48, 136	3		0		1	25	1
Chr3	3025881	3025882	hy5-1_peak_1112	9.20391	1	-12	0		1		1	-13	0		1
Chr3	3091326	3091327	hy5-1_peak_1113	63.2217	1	-5	1	108	2		1	-6	1	107	2
Chr3	3238139	3238140	hy5-1_peak_1114	7.83853	0		4	8, 43, 103, 120	4		0		2	7, 43	2
Chr3	3238925	3238926	hy5-1_peak_1115	19.9946	1	-26	2	3, 13	3		1	-27	2	2, 12	3
Chr3	3275486	3275487	hy5-1_peak_1116	130.567	1	-25	3	1, 17, 172	4		1	-26	0		1
Chr3	3313178	3313179	hy5-1_peak_1117	46.4963	1	-19	4	10, 35, 62, 90	5		1	-19	4	9, 61, 89, 35	5
Chr3	3366425	3366426	hy5-1_peak_1118	27.1816	0		0		0		0		0		0
Chr3	3379188	3379189	hy5-1_peak_1119	8.90674	1	-20	1	58	2		1	-21	0		1
Chr3	3441627	3441628	hy5-1_peak_1120	70.5376	2	-84, -54	3	10, 30, 113	5		1	-54	3	29, 112, 10	4
Chr3	3443138	3443139	hy5-1_peak_1121	101.383	1	-152	1	30	2		0		1	30	1
Chr3	3463490	3463491	hy5-1_peak_1122	86.9276	2	-67, -13	3	19, 42, 106	5		1	-14	2	18, 41	3
Chr3	3529142	3529143	hy5-1_peak_1123	83.4929	0		1	13	1		0		0		0
Chr3	3551390	3551391	hy5-1_peak_1124	117.83	2	-151, -117	3	7, 21, 141	5		2	-152, -118	1	6	3
Chr3	3575949	3575950	hy5-1_peak_1125	101.48	2	-108, -12	0		2		0		0		0
Chr3	3639430	3639431	hy5-1_peak_1126	36.4791	2	-102, -82	0		2		1	-102	0		1
Chr3	3651070	3651071	hy5-1_peak_1127	6.47628	5	-180, -164, -134, -107, -8	2	89, 143	7		2	-108, -9	0		2
Chr3	3674991	3674992	hy5-1_peak_1128	24.0946	0		0		0		0		0		0
Chr3	3684756	3684757	hy5-1_peak_1129	25.9045	2	-91, -18	2	11, 160	4		2	-92, -18	1	11	3
Chr3	3715380	3715381	hy5-1_peak_1130	23.0135	0		2	1, 189	2		0		1	188	1
Chr3	3738405	3738406	hy5-1_peak_1131	8.17248	2	-187, -171	2	2, 42	4		0		2	1, 41	2
Chr3	3772588	3772589	hy5-1_peak_1132	8.26208	2	-145, -30	1	123	3		2	-146, -31	1	123	3
Chr3	3894745	3894746	hy5-1_peak_1133	12.6983	1	-13	0		1		1	-14	0		1
Chr3	3923374	3923375	hy5-1_peak_1134	155.544	2	-60, -30	2	1, 31	4		2	-31, -60	2	30, 1	4
Chr3	3964538	3964539	hy5-1_peak_1135	10.5461	2	-169, -10	2	12, 145	4		2	-170, -10	1	12	3
Chr3	4045829	4045830	hy5-1_peak_1136	14.5931	2	-34, -30	4	18, 113, 185, 197	6		2	-35, -30	1	113	3
Chr3	4122502	4122503	hy5-1_peak_1137	31.825	2	-43, -6	0		2		1	-7	0		1
Chr3	4190481	4190482	hy5-1_peak_1138	6.4127	1	-87	0		1		1	-87	0		1
Chr3	4248706	4248707	hy5-1_peak_1139	10.7171	2	-84, -51	1	22	3		1	-84	1	21	2
Chr3	4254449	4254450	hy5-1_peak_1140	224.28	3	-119, -101, -14	1	5	4		0		0		0
Chr3	4311924	4311925	hy5-1_peak_1141	14.4962	0		1	8	1		0		1	8	1
Chr3	4379643	4379644	hy5-1_peak_1142	29.4678	1	-4	0		1		0		0		0
Chr3	4442656	4442657	hy5-1_peak_1143	60.8643	0		4	1, 86, 135, 155	4		0		0		0
Chr3	4444048	4444049	hy5-1_peak_1144	16.0777	0		1	12	1		0		0		0
Chr3	4506961	4506962	hy5-1_peak_1145	26.2863	2	-99, -27	1	117	3		1	-27	1	116	2
Chr3	4546980	4546981	hy5-1_peak_1146	55.8524	0		0		0		0		0		0
Chr3	4657413	4657414	hy5-1_peak_1147	31.5569	1	-56	1	10	2		1	-57	1	9	2
Chr3	4660839	4660840	hy5-1_peak_1148	299.83	1	-35	2	8, 88	3		0		2	7, 88	2
Chr3	4693283	4693284	hy5-1_peak_1149	22.7653	1	-26	0		1		1	-27	0		1
Chr3	4708942	4708943	hy5-1_peak_1150	63.0174	4	-195, -185, -162, -152	1	194	5		4	-196, -185, -162, -152	1	194	5
Chr3	4723883	4723884	hy5-1_peak_1151	232.955	1	-135	4	2, 12, 45, 85	5		0		3	44, 2, 12	3
Chr3	4746488	4746489	hy5-1_peak_1152	11.3879	1	-135	3	11, 43, 91	4		1	-136	3	10, 42, 90	4
Chr3	4782560	4782561	hy5-1_peak_1153	295.204	2	-52, -16	3	5, 18, 57	5		2	-17, -52	3	4, 17, 57	5
Chr3	4846109	4846110	hy5-1_peak_1154	283.338	1	-25	2	12, 44	3		1	-26	2	43, 12	3
Chr3	4976064	4976065	hy5-1_peak_1155	11.7982	1	-61	1	6	2		1	-61	1	5	2
Chr3	4988632	4988633	hy5-1_peak_1156	136.439	1	-8	0		1		1	-9	0		1
Chr3	5047330	5047331	hy5-1_peak_1157	333.442	4	-185, -86, -56, -32	2	1, 13	6		4	-57, -33, -185, -86	1	12	5
Chr3	5059038	5059039	hy5-1_peak_1158	249.525	0		2	24, 42	2		0		2	24, 42	2
Chr3	5111225	5111226	hy5-1_peak_1159	8.17248	1	-86	3	3, 12, 17	4		1	-87	3	2, 11, 16	4
Chr3	5187061	5187062	hy5-1_peak_1160	212.147	3	-70, -16, -4	2	9, 180	5		2	-5, -70	1	8	3
Chr3	5224364	5224365	hy5-1_peak_1161	107.499	1	-7	0		1		0		0		0
Chr3	5232929	5232930	hy5-1_peak_1162	66.0077	1	-16	2	39, 72	3		1	-17	2	38, 71	3
Chr3	5242407	5242408	hy5-1_peak_1163	198.851	2	-108, -60	1	30	3		1	-61	1	29	2
Chr3	5252537	5252538	hy5-1_peak_1164	59.0284	1	-16	2	9, 94	3		1	-16	1	8	2
Chr3	5253261	5253262	hy5-1_peak_1165	10.1811	2	-69, -15	2	137, 149	4		2	-16, -69	2	136, 148	4
Chr3	5267112	5267113	hy5-1_peak_1166	61.9503	1	-32	1	15	2		1	-32	1	15	2
Chr3	5296740	5296741	hy5-1_peak_1167	256.044	0		1	158	1		0		1	158	1
Chr3	5311235	5311236	hy5-1_peak_1168	103.824	4	-186, -168, -95, -4	1	101	5		2	-187, -168	0		2
Chr3	5397023	5397024	hy5-1_peak_1169	87.8813	0		2	58, 102	2		0		2	57, 102	2
Chr3	5402706	5402707	hy5-1_peak_1170	40.5106	0		2	29, 57	2		0		2	28, 56	2
Chr3	5469518	5469519	hy5-1_peak_1171	76.1277	0		2	1, 54	2		0		2	53, 1	2
Chr3	5480181	5480182	hy5-1_peak_1172	20.6139	1	-4	0		1		1	-5	0		1
Chr3	5518363	5518364	hy5-1_peak_1173	168.24	2	-161, -6	0		2		1	-161	0		1
Chr3	5526074	5526075	hy5-1_peak_1174	229.217	3	-200, -60, -4	1	60	4		2	-5, -200	1	59	3
Chr3	5535773	5535774	hy5-1_peak_1175	54.989	0		1	4	1		0		1	4	1
Chr3	5576989	5576990	hy5-1_peak_1176	10.2459	1	-53	1	30	2		0		1	29	1
Chr3	5585132	5585133	hy5-1_peak_1177	8.17248	1	-11	3	12, 18, 30	4		1	-12	1	17	2
Chr3	5603474	5603475	hy5-1_peak_1178	18.5991	1	-4	2	5, 103	3		0		1	4	1
Chr3	5639238	5639239	hy5-1_peak_1179	62.4374	1	-10	3	41, 75, 164	4		0		1	75	1
Chr3	5645101	5645102	hy5-1_peak_1180	63.9372	2	-34, -4	0		2		1	-35	0		1
Chr3	5775495	5775496	hy5-1_peak_1181	6.10848	0		1	80	1		0		1	79	1
Chr3	5782207	5782208	hy5-1_peak_1182	16.1697	0		1	193	1		0		0		0
Chr3	5797054	5797055	hy5-1_peak_1183	81.3494	3	-174, -168, -55	3	26, 31, 55	6		3	-169, -174, -55	3	25, 30, 55	6
Chr3	5822520	5822521	hy5-1_peak_1184	17.4368	1	-48	2	55, 91	3		0		1	54	1
Chr3	5839003	5839004	hy5-1_peak_1185	11.0072	0		4	30, 75, 168, 183	4		0		3	74, 167, 182	3
Chr3	5844510	5844511	hy5-1_peak_1186	10.1545	1	-189	1	25	2		0		1	24	1
Chr3	5861338	5861339	hy5-1_peak_1187	154.286	0		1	43	1		0		0		0
Chr3	5895076	5895077	hy5-1_peak_1188	10.859	0		2	30, 60	2		0		2	29, 59	2
Chr3	5948869	5948870	hy5-1_peak_1189	16.5342	0		0		0		0		0		0
Chr3	5963318	5963319	hy5-1_peak_1190	12.6983	2	-36, -8	3	35, 50, 178	5		1	-37	3	177, 35, 50	4
Chr3	5995570	5995571	hy5-1_peak_1191	13.119	1	-15	1	39	2		1	-15	1	38	2
Chr3	6000604	6000605	hy5-1_peak_1192	34.4895	2	-71, -8	0		2		2	-9, -71	0		2
Chr3	6025893	6025894	hy5-1_peak_1193	6.71941	1	-5	0		1		1	-5	0		1
Chr3	6033227	6033228	hy5-1_peak_1194	6.28302	1	-22	1	115	2		1	-23	0		1
Chr3	6065766	6065767	hy5-1_peak_1195	185.984	0		1	108	1		0		0		0
Chr3	6125979	6125980	hy5-1_peak_1196	10.2459	1	-134	0		1		1	-135	0		1
Chr3	6158314	6158315	hy5-1_peak_1197	5.47291	1	-42	2	55, 109	3		0		0		0
Chr3	6171859	6171860	hy5-1_peak_1198	21.3322	0		1	13	1		0		1	13	1
Chr3	6182596	6182597	hy5-1_peak_1199	373.892	2	-157, -4	3	28, 37, 47	5		1	-158	3	36, 28, 47	4
Chr3	6191731	6191732	hy5-1_peak_1200	22.2217	0		1	14	1		0		1	13	1
Chr3	6273877	6273878	hy5-1_peak_1201	174.417	4	-171, -154, -57, -35	1	20	5		3	-172, -58, -36	1	19	4
Chr3	6296794	6296795	hy5-1_peak_1202	26.1567	1	-66	1	12	2		1	-67	1	11	2
Chr3	6301896	6301897	hy5-1_peak_1203	63.5666	2	-183, -25	1	20	3		1	-26	1	19	2
Chr3	6404488	6404489	hy5-1_peak_1204	16.9907	0		2	6, 27	2		0		1	5	1
Chr3	6457677	6457678	hy5-1_peak_1205	283.373	1	-12	2	1, 39	3		1	-12	1	1	2
Chr3	6490280	6490281	hy5-1_peak_1206	391.572	1	-42	1	20	2		0		1	19	1
Chr3	6501528	6501529	hy5-1_peak_1207	51.2359	0		2	8, 106	2		0		1	7	1
Chr3	6525498	6525499	hy5-1_peak_1208	9.9212	0		1	23	1		0		1	22	1
Chr3	6536595	6536596	hy5-1_peak_1209	7.93572	0		3	18, 39, 54	3		0		3	17, 38, 53	3
Chr3	6546144	6546145	hy5-1_peak_1210	239.462	1	-8	1	48	2		1	-9	1	47	2
Chr3	6673526	6673527	hy5-1_peak_1211	155.759	1	-27	2	26, 125	3		1	-28	2	25, 124	3
Chr3	6678716	6678717	hy5-1_peak_1212	11.0751	2	-33, -25	1	110	3		2	-34, -25	1	109	3
Chr3	6722790	6722791	hy5-1_peak_1213	11.4701	0		2	31, 82	2		0		2	81, 31	2
Chr3	6805367	6805368	hy5-1_peak_1214	134.547	4	-114, -41, -12, -7	2	10, 62	6		2	-115, -8	1	9	3
Chr3	6823576	6823577	hy5-1_peak_1215	75.4051	0		1	5	1		0		0		0
Chr3	6834391	6834392	hy5-1_peak_1216	34.0311	0		1	1	1		0		1	1	1
Chr3	6900736	6900737	hy5-1_peak_1217	5.39882	1	-155	0		1		1	-156	0		1
Chr3	6931031	6931032	hy5-1_peak_1218	216.044	2	-29, -6	2	23, 132	4		2	-7, -29	1	22	3
Chr3	6980407	6980408	hy5-1_peak_1219	40.6995	1	-15	1	29	2		1	-15	1	28	2
Chr3	7039509	7039510	hy5-1_peak_1220	8.45697	1	-93	1	18	2		1	-93	0		1
Chr3	7047010	7047011	hy5-1_peak_1221	10.9661	1	-43	0		1		1	-43	0		1
Chr3	7063637	7063638	hy5-1_peak_1222	7.99646	3	-45, -16, -10	0		3		2	-46, -11	0		2
Chr3	7093622	7093623	hy5-1_peak_1223	212.647	3	-145, -33, -5	2	54, 61	5		2	-34, -5	1	60	3
Chr3	7104375	7104376	hy5-1_peak_1224	35.2674	0		0		0		0		0		0
Chr3	7178086	7178087	hy5-1_peak_1225	11.7606	1	-22	1	38	2		1	-23	0		1
Chr3	7230589	7230590	hy5-1_peak_1226	23.2503	1	-4	0		1		1	-5	0		1
Chr3	7281694	7281695	hy5-1_peak_1227	43.7321	3	-185, -86, -34	1	40	4		1	-86	0		1
Chr3	7324030	7324031	hy5-1_peak_1228	194.634	1	-10	2	51, 174	3		0		1	51	1
Chr3	7377274	7377275	hy5-1_peak_1229	10.7183	1	-40	0		1		1	-41	0		1
Chr3	7412868	7412869	hy5-1_peak_1230	20.1248	2	-152, -4	0		2		1	-5	0		1
Chr3	7413723	7413724	hy5-1_peak_1231	38.1952	1	-91	1	3	2		1	-91	1	3	2
Chr3	7558642	7558643	hy5-1_peak_1232	43.7526	0		0		0		0		0		0
Chr3	7594899	7594900	hy5-1_peak_1233	10.2361	0		1	135	1		0		0		0
Chr3	7608621	7608622	hy5-1_peak_1234	340.793	2	-53, -18	2	4, 46	4		1	-19	1	3	2
Chr3	7657948	7657949	hy5-1_peak_1235	11.2233	1	-15	1	123	2		1	-15	1	123	2
Chr3	7668417	7668418	hy5-1_peak_1236	4.00401	1	-155	4	21, 60, 90, 117	5		1	-155	3	59, 89, 21	4
Chr3	7675157	7675158	hy5-1_peak_1237	97.4322	2	-70, -13	1	27	3		1	-14	0		1
Chr3	7732475	7732476	hy5-1_peak_1238	27.5415	0		5	8, 41, 79, 118, 148	5		0		2	78, 147	2
Chr3	7834245	7834246	hy5-1_peak_1239	115.558	1	-11	1	102	2		1	-11	0		1
Chr3	7855952	7855953	hy5-1_peak_1240	12.3423	0		6	9, 18, 24, 33, 39, 48	6		0		3	8, 23, 38	3
Chr3	7909913	7909914	hy5-1_peak_1241	291.624	2	-44, -10	2	101, 179	4		2	-45, -11	1	101	3
Chr3	7933895	7933896	hy5-1_peak_1242	63.6616	2	-152, -6	1	106	3		2	-7, -152	0		2
Chr3	7959619	7959620	hy5-1_peak_1243	261.063	1	-55	2	55, 79	3		1	-56	2	78, 55	3
Chr3	8035124	8035125	hy5-1_peak_1244	77.1439	3	-84, -21, -8	1	29	4		1	-85	1	29	2
Chr3	8065657	8065658	hy5-1_peak_1245	10.2524	3	-27, -15, -5	0		3		1	-6	0		1
Chr3	8087846	8087847	hy5-1_peak_1246	14.8906	0		1	1	1		0		0		0
Chr3	8101041	8101042	hy5-1_peak_1247	10.4448	1	-61	1	123	2		1	-62	1	122	2
Chr3	8111639	8111640	hy5-1_peak_1248	39.2177	1	-103	2	1, 113	3		1	-103	1	113	2
Chr3	8151826	8151827	hy5-1_peak_1249	96.4496	2	-126, -31	2	1, 103	4		1	-127	1	103	2
Chr3	8209337	8209338	hy5-1_peak_1250	33.9131	1	-37	0		1		0		0		0
Chr3	8245913	8245914	hy5-1_peak_1251	9.48493	1	-16	3	28, 157, 161	4		1	-16	0		1
Chr3	8322842	8322843	hy5-1_peak_1252	13.8477	1	-5	0		1		1	-5	0		1
Chr3	8435424	8435425	hy5-1_peak_1253	13.6148	1	-13	1	38	2		1	-13	1	37	2
Chr3	8477420	8477421	hy5-1_peak_1254	23.4907	2	-90, -14	0		2		0		0		0
Chr3	8489614	8489615	hy5-1_peak_1255	14.0029	2	-99, -52	1	84	3		0		0		0
Chr3	8533837	8533838	hy5-1_peak_1256	34.5849	0		1	7	1		0		1	7	1
Chr3	8591918	8591919	hy5-1_peak_1257	10.0298	1	-43	1	170	2		0		1	170	1
Chr3	8741622	8741623	hy5-1_peak_1258	15.621	1	-144	2	4, 169	3		1	-145	1	4	2
Chr3	8941294	8941295	hy5-1_peak_1259	34.9038	1	-16	1	7	2		1	-17	1	6	2
Chr3	8942354	8942355	hy5-1_peak_1260	254.643	2	-18, -9	3	7, 13, 100	5		0		0		0
Chr3	8961215	8961216	hy5-1_peak_1261	14.7133	0		1	8	1		0		0		0
Chr3	8980025	8980026	hy5-1_peak_1262	45.4441	2	-152, -15	0		2		2	-152, -15	0		2
Chr3	8987810	8987811	hy5-1_peak_1263	22.5438	0		1	28	1		0		1	28	1
Chr3	8992141	8992142	hy5-1_peak_1264	12.8934	1	-15	1	6	2		1	-16	1	6	2
Chr3	8999581	8999582	hy5-1_peak_1265	13.5058	1	-22	0		1		1	-23	0		1
Chr3	9066336	9066337	hy5-1_peak_1266	142.223	1	-46	1	45	2		1	-47	1	44	2
Chr3	9162154	9162155	hy5-1_peak_1267	12.2306	3	-166, -55, -34	1	14	4		0		1	14	1
Chr3	9192249	9192250	hy5-1_peak_1268	22.4054	0		1	8	1		0		1	7	1
Chr3	9315680	9315681	hy5-1_peak_1269	44.9823	1	-4	1	20	2		1	-5	0		1
Chr3	9370889	9370890	hy5-1_peak_1270	87.2922	1	-140	1	14	2		0		1	14	1
Chr3	9377240	9377241	hy5-1_peak_1271	111.255	1	-46	1	9	2		1	-47	1	9	2
Chr3	9394606	9394607	hy5-1_peak_1272	19.8749	1	-22	1	17	2		0		1	16	1
Chr3	9450290	9450291	hy5-1_peak_1273	5.56259	1	-140	1	91	2		1	-141	0		1
Chr3	9472598	9472599	hy5-1_peak_1274	29.7376	3	-138, -115, -5	1	126	4		2	-115, -5	1	125	3
Chr3	9487577	9487578	hy5-1_peak_1275	6.49641	0		2	51, 70	2		0		0		0
Chr3	9555521	9555522	hy5-1_peak_1276	7.88064	1	-40	1	47	2		1	-41	0		1
Chr3	9577075	9577076	hy5-1_peak_1277	73.1992	1	-13	1	147	2		0		0		0
Chr3	9676447	9676448	hy5-1_peak_1278	13.5006	0		1	96	1		0		1	95	1
Chr3	9852406	9852407	hy5-1_peak_1279	9.13561	0		1	10	1		0		1	9	1
Chr3	9855246	9855247	hy5-1_peak_1280	10.5349	2	-187, -7	1	10	3		1	-187	0		1
Chr3	9935582	9935583	hy5-1_peak_1281	15.8735	0		1	14	1		0		1	14	1
Chr3	9969089	9969090	hy5-1_peak_1282	23.3651	0		0		0		0		0		0
Chr3	10047488	10047489	hy5-1_peak_1283	10.9974	2	-87, -16	2	42, 90	4		2	-88, -17	1	41	3
Chr3	10062177	10062178	hy5-1_peak_1284	8.98867	4	-152, -110, -37, -5	2	167, 191	6		3	-153, -6, -110	2	166, 190	5
Chr3	10073893	10073894	hy5-1_peak_1285	274.568	1	-135	3	1, 11, 32	4		1	-136	1	1	2
Chr3	10119926	10119927	hy5-1_peak_1286	10.2459	0		1	168	1		0		1	167	1
Chr3	10130117	10130118	hy5-1_peak_1287	105.575	1	-17	1	3	2		1	-18	1	3	2
Chr3	10201487	10201488	hy5-1_peak_1288	12.1343	0		0		0		0		0		0
Chr3	10255776	10255777	hy5-1_peak_1289	81.3026	2	-147, -32	2	43, 93	4		1	-32	2	42, 93	3
Chr3	10308654	10308655	hy5-1_peak_1290	13.2703	2	-108, -9	1	14	3		1	-109	1	13	2
Chr3	10311207	10311208	hy5-1_peak_1291	45.3483	1	-184	4	1, 53, 98, 162	5		0		3	52, 97, 162	3
Chr3	10330348	10330349	hy5-1_peak_1292	10.9161	2	-59, -10	1	7	3		1	-11	1	6	2
Chr3	10383953	10383954	hy5-1_peak_1293	16.9722	2	-99, -45	3	16, 30, 194	5		1	-46	2	193, 30	3
Chr3	10392778	10392779	hy5-1_peak_1294	7.57808	2	-157, -126	0		2		0		0		0
Chr3	10548930	10548931	hy5-1_peak_1295	107.243	2	-107, -19	1	66	3		2	-108, -19	1	65	3
Chr3	10567164	10567165	hy5-1_peak_1296	101.884	2	-108, -20	1	65	3		2	-109, -20	1	64	3
Chr3	10575573	10575574	hy5-1_peak_1297	19.2908	3	-129, -68, -11	2	50, 107	5		0		0		0
Chr3	10662879	10662880	hy5-1_peak_1298	66.3517	2	-64, -6	0		2		2	-65, -7	0		2
Chr3	10717391	10717392	hy5-1_peak_1299	50.2252	1	-11	2	14, 37	3		0		1	14	1
Chr3	10790766	10790767	hy5-1_peak_1300	75.906	2	-125, -13	0		2		1	-14	0		1
Chr3	10931213	10931214	hy5-1_peak_1301	36.6784	2	-91, -10	1	74	3		2	-92, -11	1	73	3
Chr3	10949759	10949760	hy5-1_peak_1302	174.278	1	-39	1	53	2		0		1	52	1
Chr3	11023116	11023117	hy5-1_peak_1303	24.994	2	-49, -22	1	28	3		1	-22	0		1
Chr3	11023920	11023921	hy5-1_peak_1304	19.4158	1	-47	1	35	2		0		0		0
Chr3	11052608	11052609	hy5-1_peak_1305	25.2257	1	-11	2	118, 142	3		0		1	141	1
Chr3	11124620	11124621	hy5-1_peak_1306	87.4003	0		1	3	1		0		0		0
Chr3	11249792	11249793	hy5-1_peak_1307	123.409	3	-196, -191, -50	1	1	4		2	-51, -196	0		2
Chr3	11384182	11384183	hy5-1_peak_1308	107.199	3	-91, -47, -9	4	17, 53, 108, 151	7		3	-92, -48, -10	3	52, 107, 150	6
Chr3	11551876	11551877	hy5-1_peak_1309	58.2969	2	-144, -5	1	19	3		1	-6	1	19	2
Chr3	11664217	11664218	hy5-1_peak_1310	12.5105	1	-8	1	15	2		1	-9	1	14	2
Chr3	11702942	11702943	hy5-1_peak_1311	189.622	1	-51	0		1		1	-51	0		1
Chr3	11731094	11731095	hy5-1_peak_1312	36.6348	1	-6	0		1		1	-7	0		1
Chr3	11784746	11784747	hy5-1_peak_1313	22.6361	1	-33	0		1		1	-33	0		1
Chr3	11920619	11920620	hy5-1_peak_1314	32.3632	1	-4	1	126	2		1	-5	1	125	2
Chr3	11974435	11974436	hy5-1_peak_1315	15.9663	1	-144	2	1, 101	3		0		1	101	1
Chr3	12104262	12104263	hy5-1_peak_1316	17.452	0		1	10	1		0		1	10	1
Chr3	12120766	12120767	hy5-1_peak_1317	47.0226	3	-127, -77, -17	2	3, 161	5		0		1	3	1
Chr3	12663922	12663923	hy5-1_peak_1318	19.4517	1	-32	0		1		1	-32	0		1
Chr3	13368184	13368185	hy5-1_peak_1319	23.5192	3	-176, -112, -28	1	10	4		3	-113, -29, -176	1	9	4
Chr3	13396190	13396191	hy5-1_peak_1320	10.9161	0		0		0		0		0		0
Chr3	13424901	13424902	hy5-1_peak_1321	5.62467	1	-145	2	7, 62	3		0		2	61, 7	2
Chr3	13590553	13590554	hy5-1_peak_1322	110.169	0		0		0		0		0		0
Chr3	13598622	13598623	hy5-1_peak_1323	37.0543	0		0		0		0		0		0
Chr3	13633132	13633133	hy5-1_peak_1324	19.8705	1	-161	0		1		0		0		0
Chr3	13705915	13705916	hy5-1_peak_1325	56.4418	0		0		0		0		0		0
Chr3	13709954	13709955	hy5-1_peak_1326	18.3549	0		1	27	1		0		1	26	1
Chr3	13723284	13723285	hy5-1_peak_1327	9.22709	0		0		0		0		0		0
Chr3	13737016	13737017	hy5-1_peak_1328	8.1754	0		1	158	1		0		0		0
Chr3	13751468	13751469	hy5-1_peak_1329	59.7416	0		0		0		0		0		0
Chr3	13798642	13798643	hy5-1_peak_1330	11.7461	0		1	138	1		0		0		0
Chr3	13801105	13801106	hy5-1_peak_1331	8.68569	0		0		0		0		0		0
Chr3	13814835	13814836	hy5-1_peak_1332	34.9095	0		0		0		0		0		0
Chr3	13816307	13816308	hy5-1_peak_1333	32.8171	0		0		0		0		0		0
Chr3	13836688	13836689	hy5-1_peak_1334	17.8191	1	-171	0		1		0		0		0
Chr3	13845703	13845704	hy5-1_peak_1335	6.99472	0		0		0		0		0		0
Chr3	13853916	13853917	hy5-1_peak_1336	27.7925	0		0		0		0		0		0
Chr3	13863241	13863242	hy5-1_peak_1337	3.79248	0		0		0		0		0		0
Chr3	13869777	13869778	hy5-1_peak_1338	3.92702	0		0		0		0		0		0
Chr3	13894542	13894543	hy5-1_peak_1339	22.7893	1	-26	3	3, 26, 58	4		1	-27	3	25, 57, 3	4
Chr3	13923108	13923109	hy5-1_peak_1340	50.4643	2	-41, -13	2	11, 43	4		2	-42, -13	2	10, 42	4
Chr3	13965366	13965367	hy5-1_peak_1341	146.25	3	-61, -29, -6	1	23	4		3	-62, -30, -7	1	22	4
Chr3	14175682	14175683	hy5-1_peak_1342	22.4141	1	-150	0		1		0		0		0
Chr3	14180486	14180487	hy5-1_peak_1343	15.657	0		0		0		0		0		0
Chr3	14181360	14181361	hy5-1_peak_1344	8.59406	0		0		0		0		0		0
Chr3	14185375	14185376	hy5-1_peak_1345	12.0296	1	-128	0		1		0		0		0
Chr3	14186430	14186431	hy5-1_peak_1346	8.16442	0		0		0		0		0		0
Chr3	14192448	14192449	hy5-1_peak_1347	71.8394	0		0		0		0		0		0
Chr3	14194037	14194038	hy5-1_peak_1348	27.9226	0		0		0		0		0		0
Chr3	14194700	14194701	hy5-1_peak_1349	29.2026	0		0		0		0		0		0
Chr3	14202372	14202373	hy5-1_peak_1350	16.5273	0		0		0		0		0		0
Chr3	14212757	14212758	hy5-1_peak_1351	9.7676	2	-112, -96	0		2		1	-113	0		1
Chr3	14214731	14214732	hy5-1_peak_1352	8.1608	0		0		0		0		0		0
Chr3	14215556	14215557	hy5-1_peak_1353	14.884	0		0		0		0		0		0
Chr3	14223210	14223211	hy5-1_peak_1354	32.234	0		0		0		0		0		0
Chr3	14540287	14540288	hy5-1_peak_1355	26.3988	1	-18	1	15	2		1	-19	1	15	2
Chr3	14853495	14853496	hy5-1_peak_1356	22.2141	0		2	51, 113	2		0		2	51, 113	2
Chr3	14899607	14899608	hy5-1_peak_1357	6.87219	0		4	23, 45, 57, 104	4		0		2	44, 56	2
Chr3	15019916	15019917	hy5-1_peak_1358	8.516	2	-131, -19	0		2		2	-132, -19	0		2
Chr3	15187868	15187869	hy5-1_peak_1359	37.779	0		0		0		0		0		0
Chr3	15196740	15196741	hy5-1_peak_1360	17.366	1	-4	1	2	2		1	-5	1	1	2
Chr3	15300835	15300836	hy5-1_peak_1361	8.85365	0		0		0		0		0		0
Chr3	15600397	15600398	hy5-1_peak_1362	41.8235	0		2	7, 44	2		0		2	7, 44	2
Chr3	15680237	15680238	hy5-1_peak_1363	37.7354	0		1	45	1		0		1	45	1
Chr3	15835084	15835085	hy5-1_peak_1364	12.7732	1	-20	0		1		1	-20	0		1
Chr3	15930820	15930821	hy5-1_peak_1365	24.9361	1	-11	1	12	2		1	-12	0		1
Chr3	15952653	15952654	hy5-1_peak_1366	11.7606	1	-103	2	56, 179	3		0		1	55	1
Chr3	15987960	15987961	hy5-1_peak_1367	10.859	2	-162, -5	1	138	3		2	-163, -5	0		2
Chr3	16056068	16056069	hy5-1_peak_1368	12.8089	0		2	2, 20	2		0		2	1, 19	2
Chr3	16114819	16114820	hy5-1_peak_1369	145.017	1	-12	1	9	2		1	-13	1	8	2
Chr3	16277412	16277413	hy5-1_peak_1370	245.813	0		2	5, 28	2		0		2	4, 27	2
Chr3	16303165	16303166	hy5-1_peak_1371	254.943	2	-40, -24	2	9, 64	4		1	-41	1	63	2
Chr3	16318782	16318783	hy5-1_peak_1372	20.6607	0		2	5, 22	2		0		2	4, 22	2
Chr3	16358487	16358488	hy5-1_peak_1373	10.9029	0		0		0		0		0		0
Chr3	16420876	16420877	hy5-1_peak_1374	28.9677	1	-110	1	18	2		0		1	18	1
Chr3	16482003	16482004	hy5-1_peak_1375	68.1106	2	-190, -10	1	45	3		2	-190, -10	1	44	3
Chr3	16541982	16541983	hy5-1_peak_1376	353.594	2	-74, -24	1	9	3		2	-75, -25	1	8	3
Chr3	16630588	16630589	hy5-1_peak_1377	18.5698	1	-40	2	13, 25	3		1	-41	1	13	2
Chr3	16703782	16703783	hy5-1_peak_1378	10.9465	0		3	53, 57, 87	3		0		2	52, 57	2
Chr3	16883533	16883534	hy5-1_peak_1379	12.1643	2	-94, -10	1	21	3		0		1	20	1
Chr3	16898161	16898162	hy5-1_peak_1380	215.123	0		1	5	1		0		1	5	1
Chr3	16914216	16914217	hy5-1_peak_1381	71.995	0		2	14, 178	2		0		1	178	1
Chr3	16992318	16992319	hy5-1_peak_1382	47.6708	1	-23	3	38, 53, 171	4		0		1	52	1
Chr3	16999450	16999451	hy5-1_peak_1383	36.046	2	-182, -26	1	50	3		1	-183	1	49	2
Chr3	17003144	17003145	hy5-1_peak_1384	98.3619	1	-36	2	25, 40	3		0		1	39	1
Chr3	17020196	17020197	hy5-1_peak_1385	15.8767	1	-10	2	21, 105	3		1	-11	0		1
Chr3	17028338	17028339	hy5-1_peak_1386	54.2717	1	-6	1	18	2		1	-6	1	17	2
Chr3	17095641	17095642	hy5-1_peak_1387	60.7641	0		4	3, 66, 86, 170	4		0		2	2, 86	2
Chr3	17117574	17117575	hy5-1_peak_1388	161.262	0		1	1	1		0		1	1	1
Chr3	17182929	17182930	hy5-1_peak_1389	57.8784	2	-80, -65	2	7, 82	4		2	-81, -65	2	81, 7	4
Chr3	17212425	17212426	hy5-1_peak_1390	18.4031	0		1	10	1		0		1	9	1
Chr3	17228567	17228568	hy5-1_peak_1391	20.7371	1	-88	2	20, 172	3		1	-88	1	20	2
Chr3	17262086	17262087	hy5-1_peak_1392	19.449	1	-95	1	71	2		0		1	70	1
Chr3	17332758	17332759	hy5-1_peak_1393	109.789	0		1	6	1		0		1	5	1
Chr3	17347422	17347423	hy5-1_peak_1394	24.1547	1	-4	0		1		1	-5	0		1
Chr3	17392035	17392036	hy5-1_peak_1395	9.30126	2	-105, -8	2	77, 195	4		1	-106	1	194	2
Chr3	17478878	17478879	hy5-1_peak_1396	20.3438	4	-184, -119, -61, -37	1	64	5		3	-62, -119, -37	1	64	4
Chr3	17494969	17494970	hy5-1_peak_1397	8.829	0		2	9, 148	2		0		2	147, 9	2
Chr3	17551372	17551373	hy5-1_peak_1398	29.9841	2	-68, -29	3	5, 73, 80	5		2	-69, -30	3	72, 5, 80	5
Chr3	17567413	17567414	hy5-1_peak_1399	71.0612	0		2	34, 85	2		0		1	84	1
Chr3	17704114	17704115	hy5-1_peak_1400	10.8294	2	-41, -28	2	6, 27	4		2	-41, -28	1	26	3
Chr3	17710750	17710751	hy5-1_peak_1401	31.3514	0		1	34	1		0		0		0
Chr3	17739887	17739888	hy5-1_peak_1402	23.8332	1	-46	1	77	2		1	-46	1	76	2
Chr3	17868275	17868276	hy5-1_peak_1403	48.8523	5	-65, -58, -40, -15, -8	2	18, 57	7		3	-40, -15, -8	2	17, 56	5
Chr3	17895715	17895716	hy5-1_peak_1404	50.8498	1	-92	3	31, 96, 166	4		0		1	95	1
Chr3	17920764	17920765	hy5-1_peak_1405	111.621	1	-118	0		1		1	-119	0		1
Chr3	17967842	17967843	hy5-1_peak_1406	33.1955	3	-165, -126, -85	2	7, 46	5		2	-166, -86	2	6, 45	4
Chr3	17975678	17975679	hy5-1_peak_1407	341.372	2	-187, -28	3	7, 22, 186	5		1	-29	2	6, 185	3
Chr3	18000048	18000049	hy5-1_peak_1408	26.5236	3	-56, -36, -11	1	95	4		1	-12	1	95	2
Chr3	18035327	18035328	hy5-1_peak_1409	29.2192	0		2	9, 21	2		0		1	9	1
Chr3	18103138	18103139	hy5-1_peak_1410	23.0618	1	-7	0		1		1	-8	0		1
Chr3	18149162	18149163	hy5-1_peak_1411	25.6592	0		1	20	1		0		1	20	1
Chr3	18155733	18155734	hy5-1_peak_1412	226.145	1	-59	2	37, 65	3		1	-60	2	36, 64	3
Chr3	18193458	18193459	hy5-1_peak_1413	121.083	1	-75	2	2, 66	3		1	-75	2	1, 65	3
Chr3	18215678	18215679	hy5-1_peak_1414	76.1787	1	-4	0		1		0		0		0
Chr3	18242767	18242768	hy5-1_peak_1415	269.837	1	-15	3	19, 109, 161	4		0		1	109	1
Chr3	18250430	18250431	hy5-1_peak_1416	141.536	2	-148, -33	1	1	3		2	-149, -33	1	1	3
Chr3	18373826	18373827	hy5-1_peak_1417	298.917	2	-72, -25	2	12, 103	4		0		2	11, 102	2
Chr3	18560857	18560858	hy5-1_peak_1418	24.0217	0		2	50, 68	2		0		0		0
Chr3	18563410	18563411	hy5-1_peak_1419	18.0934	2	-47, -26	1	82	3		2	-48, -27	0		2
Chr3	18584703	18584704	hy5-1_peak_1420	15.9789	1	-172	1	4	2		1	-172	1	4	2
Chr3	18588752	18588753	hy5-1_peak_1421	18.1457	1	-137	1	39	2		0		0		0
Chr3	18634717	18634718	hy5-1_peak_1422	14.2542	0		0		0		0		0		0
Chr3	18665588	18665589	hy5-1_peak_1423	21.3322	1	-9	2	10, 61	3		1	-10	1	60	2
Chr3	18681825	18681826	hy5-1_peak_1424	267.841	2	-64, -10	1	45	3		2	-65, -10	0		2
Chr3	18710471	18710472	hy5-1_peak_1425	113.845	1	-59	1	52	2		0		1	51	1
Chr3	18790342	18790343	hy5-1_peak_1426	134.524	1	-12	2	26, 74	3		1	-13	2	25, 73	3
Chr3	18808795	18808796	hy5-1_peak_1427	261.487	3	-146, -84, -65	1	12	4		0		1	11	1
Chr3	18837532	18837533	hy5-1_peak_1428	87.9525	1	-43	2	55, 89	3		1	-43	1	88	2
Chr3	18892472	18892473	hy5-1_peak_1429	74.3714	0		1	52	1		0		1	52	1
Chr3	18895561	18895562	hy5-1_peak_1430	17.8191	0		0		0		0		0		0
Chr3	18901695	18901696	hy5-1_peak_1431	253.035	4	-78, -66, -42, -21	2	13, 85	6		3	-67, -22, -78	1	12	4
Chr3	18919254	18919255	hy5-1_peak_1432	334.04	2	-168, -161	2	15, 67	4		2	-169, -162	0		2
Chr3	18941813	18941814	hy5-1_peak_1433	14.4718	1	-191	3	33, 40, 51	4		1	-192	1	50	2
Chr3	18946599	18946600	hy5-1_peak_1434	52.3928	2	-156, -6	2	34, 141	4		1	-6	1	33	2
Chr3	18949969	18949970	hy5-1_peak_1435	33.443	1	-23	0		1		1	-23	0		1
Chr3	18969094	18969095	hy5-1_peak_1436	26.9277	1	-10	1	13	2		1	-10	0		1
Chr3	19019008	19019009	hy5-1_peak_1437	304.701	1	-5	2	20, 50	3		1	-5	2	19, 49	3
Chr3	19025554	19025555	hy5-1_peak_1438	36.8059	1	-4	0		1		0		0		0
Chr3	19028130	19028131	hy5-1_peak_1439	23.0821	0		2	2, 197	2		0		1	1	1
Chr3	19067182	19067183	hy5-1_peak_1440	23.5192	2	-186, -22	1	6	3		1	-186	1	5	2
Chr3	19089806	19089807	hy5-1_peak_1441	9.48493	0		1	4	1		0		1	3	1
Chr3	19094884	19094885	hy5-1_peak_1442	19.8749	1	-41	1	45	2		1	-42	0		1
Chr3	19115082	19115083	hy5-1_peak_1443	12.2684	0		2	11, 23	2		0		2	10, 22	2
Chr3	19173818	19173819	hy5-1_peak_1444	357.02	2	-19, -4	1	40	3		2	-20, -5	1	40	3
Chr3	19188807	19188808	hy5-1_peak_1445	6.33045	2	-116, -34	0		2		2	-117, -34	0		2
Chr3	19197523	19197524	hy5-1_peak_1446	43.8472	3	-86, -47, -40	1	41	4		2	-41, -47	1	40	3
Chr3	19214650	19214651	hy5-1_peak_1447	6.10848	1	-45	3	10, 57, 81	4		1	-45	1	9	2
Chr3	19251094	19251095	hy5-1_peak_1448	24.6515	1	-4	1	47	2		0		0		0
Chr3	19287653	19287654	hy5-1_peak_1449	100.943	2	-34, -8	1	85	3		2	-9, -34	0		2
Chr3	19312152	19312153	hy5-1_peak_1450	70.7881	0		3	2, 21, 84	3		0		2	20, 84	2
Chr3	19325776	19325777	hy5-1_peak_1451	12.0116	3	-200, -50, -29	2	26, 45	5		1	-30	2	25, 45	3
Chr3	19417269	19417270	hy5-1_peak_1452	15.1663	2	-131, -18	0		2		1	-131	0		1
Chr3	19452812	19452813	hy5-1_peak_1453	8.74576	1	-119	2	3, 197	3		1	-120	1	2	2
Chr3	19469368	19469369	hy5-1_peak_1454	31.0683	2	-70, -10	0		2		1	-71	0		1
Chr3	19475755	19475756	hy5-1_peak_1455	405.351	4	-151, -142, -48, -4	1	16	5		3	-152, -143, -5	1	15	4
Chr3	19490721	19490722	hy5-1_peak_1456	16.5546	3	-127, -29, -23	1	79	4		1	-29	0		1
Chr3	19653972	19653973	hy5-1_peak_1457	71.5817	2	-144, -17	1	23	3		2	-145, -18	1	22	3
Chr3	19662216	19662217	hy5-1_peak_1458	33.213	1	-71	1	17	2		0		0		0
Chr3	19666572	19666573	hy5-1_peak_1459	327.448	1	-27	4	5, 70, 108, 145	5		1	-28	4	4, 69, 107, 145	5
Chr3	19679106	19679107	hy5-1_peak_1460	18.2969	1	-5	1	48	2		0		0		0
Chr3	19706824	19706825	hy5-1_peak_1461	16.6584	0		3	1, 22, 30	3		0		3	21, 29, 1	3
Chr3	19798062	19798063	hy5-1_peak_1462	415.07	1	-16	0		1		1	-17	0		1
Chr3	19807501	19807502	hy5-1_peak_1463	37.1765	2	-37, -5	0		2		1	-6	0		1
Chr3	19889184	19889185	hy5-1_peak_1464	13.0795	0		1	17	1		0		1	16	1
Chr3	19890387	19890388	hy5-1_peak_1465	7.35475	3	-150, -43, -6	0		3		2	-44, -7	0		2
Chr3	19995893	19995894	hy5-1_peak_1466	12.9247	1	-4	0		1		1	-5	0		1
Chr3	20117538	20117539	hy5-1_peak_1467	32.6338	2	-175, -11	0		2		1	-12	0		1
Chr3	20132177	20132178	hy5-1_peak_1468	14.3212	0		2	19, 30	2		0		1	30	1
Chr3	20228586	20228587	hy5-1_peak_1469	13.8466	1	-12	0		1		0		0		0
Chr3	20251723	20251724	hy5-1_peak_1470	187.3	2	-50, -9	1	14	3		0		1	14	1
Chr3	20316888	20316889	hy5-1_peak_1471	59.0331	1	-79	1	111	2		1	-80	1	110	2
Chr3	20341102	20341103	hy5-1_peak_1472	98.0478	1	-5	1	70	2		1	-6	0		1
Chr3	20366960	20366961	hy5-1_peak_1473	13.6342	1	-29	1	49	2		1	-30	1	49	2
Chr3	20438785	20438786	hy5-1_peak_1474	28.2332	1	-145	2	14, 37	3		1	-146	0		1
Chr3	20476640	20476641	hy5-1_peak_1475	121.379	3	-187, -67, -10	1	39	4		2	-68, -10	0		2
Chr3	20577177	20577178	hy5-1_peak_1476	254.193	1	-9	2	154, 168	3		1	-9	2	154, 168	3
Chr3	20605434	20605435	hy5-1_peak_1477	8.85365	2	-154, -108	1	20	3		1	-109	1	19	2
Chr3	20611468	20611469	hy5-1_peak_1478	29.0729	1	-160	2	4, 18	3		1	-160	2	3, 18	3
Chr3	20651539	20651540	hy5-1_peak_1479	20.6028	1	-68	1	3	2		0		1	2	1
Chr3	20714869	20714870	hy5-1_peak_1480	242.42	2	-39, -17	2	7, 160	4		1	-40	1	6	2
Chr3	20720627	20720628	hy5-1_peak_1481	23.3696	2	-161, -26	1	24	3		1	-27	0		1
Chr3	20734623	20734624	hy5-1_peak_1482	10.8167	3	-100, -62, -30	0		3		2	-101, -30	0		2
Chr3	20816089	20816090	hy5-1_peak_1483	11.1855	0		1	18	1		0		1	17	1
Chr3	20829357	20829358	hy5-1_peak_1484	75.8147	1	-141	2	7, 133	3		1	-141	1	7	2
Chr3	20836700	20836701	hy5-1_peak_1485	10.2616	3	-145, -118, -60	1	114	4		1	-119	0		1
Chr3	20872388	20872389	hy5-1_peak_1486	232.935	2	-187, -42	1	10	3		1	-42	1	9	2
Chr3	20890137	20890138	hy5-1_peak_1487	329.356	1	-13	1	27	2		1	-13	1	26	2
Chr3	20896097	20896098	hy5-1_peak_1488	6.58113	1	-13	3	32, 107, 132	4		1	-13	3	31, 106, 131	4
Chr3	20903152	20903153	hy5-1_peak_1489	157.846	1	-24	1	22	2		1	-25	1	21	2
Chr3	20941444	20941445	hy5-1_peak_1490	31.6655	1	-155	0		1		0		0		0
Chr3	21007954	21007955	hy5-1_peak_1491	55.3826	3	-70, -41, -4	1	113	4		1	-71	0		1
Chr3	21037173	21037174	hy5-1_peak_1492	286.456	1	-193	3	65, 95, 115	4		1	-194	1	65	2
Chr3	21038560	21038561	hy5-1_peak_1493	15.4277	3	-125, -87, -56	1	3	4		1	-57	0		1
Chr3	21056945	21056946	hy5-1_peak_1494	8.66231	1	-26	0		1		0		0		0
Chr3	21109006	21109007	hy5-1_peak_1495	95.6904	2	-115, -85	0		2		1	-116	0		1
Chr3	21293192	21293193	hy5-1_peak_1496	12.0116	0		2	35, 166	2		0		1	34	1
Chr3	21302537	21302538	hy5-1_peak_1497	62.7298	0		3	2, 46, 53	3		0		1	45	1
Chr3	21303413	21303414	hy5-1_peak_1498	184.774	1	-20	3	9, 58, 104	4		1	-21	3	57, 103, 9	4
Chr3	21312369	21312370	hy5-1_peak_1499	80.3012	1	-45	2	7, 33	3		1	-46	0		1
Chr3	21338592	21338593	hy5-1_peak_1500	147.919	4	-182, -130, -118, -40	3	51, 123, 197	7		3	-131, -119, -41	3	50, 122, 196	6
Chr3	21371291	21371292	hy5-1_peak_1501	13.9664	0		1	6	1		0		0		0
Chr3	21388517	21388518	hy5-1_peak_1502	8.82565	0		2	21, 120	2		0		2	21, 120	2
Chr3	21420922	21420923	hy5-1_peak_1503	6.66745	3	-91, -17, -11	1	38	4		0		1	37	1
Chr3	21440751	21440752	hy5-1_peak_1504	15.3714	0		2	7, 63	2		0		1	6	1
Chr3	21464845	21464846	hy5-1_peak_1505	9.39091	0		3	20, 77, 146	3		0		1	20	1
Chr3	21470561	21470562	hy5-1_peak_1506	49.3563	2	-89, -5	1	83	3		1	-6	1	82	2
Chr3	21481954	21481955	hy5-1_peak_1507	14.0797	1	-46	1	80	2		1	-46	1	80	2
Chr3	21499102	21499103	hy5-1_peak_1508	17.7215	1	-94	1	54	2		0		0		0
Chr3	21621853	21621854	hy5-1_peak_1509	290.812	1	-17	5	4, 81, 86, 163, 189	6		1	-18	1	4	2
Chr3	21680480	21680481	hy5-1_peak_1510	94.4269	0		0		0		0		0		0
Chr3	21754860	21754861	hy5-1_peak_1511	65.5652	2	-31, -5	0		2		1	-5	0		1
Chr3	21790010	21790011	hy5-1_peak_1512	35.5397	1	-108	0		1		1	-109	0		1
Chr3	21827700	21827701	hy5-1_peak_1513	13.0355	1	-102	3	92, 118, 145	4		0		1	117	1
Chr3	21893786	21893787	hy5-1_peak_1514	168.098	1	-12	2	12, 115	3		1	-13	1	11	2
Chr3	21983540	21983541	hy5-1_peak_1515	157.579	2	-118, -34	3	63, 82, 87	5		1	-118	0		1
Chr3	21986428	21986429	hy5-1_peak_1516	25.7114	1	-96	3	1, 41, 53	4		0		2	52, 1	2
Chr3	22110618	22110619	hy5-1_peak_1517	13.6148	5	-144, -81, -57, -32, -12	3	38, 137, 147	8		3	-145, -13, -57	2	37, 147	5
Chr3	22282261	22282262	hy5-1_peak_1518	9.70809	1	-40	0		1		0		0		0
Chr3	22328065	22328066	hy5-1_peak_1519	303.759	4	-115, -43, -21, -15	2	19, 136	6		3	-116, -44, -16	1	18	4
Chr3	22360180	22360181	hy5-1_peak_1520	40.1491	0		2	107, 197	2		0		1	107	1
Chr3	22375966	22375967	hy5-1_peak_1521	256.664	1	-99	2	40, 95	3		0		1	39	1
Chr3	22463390	22463391	hy5-1_peak_1522	8.35642	1	-95	2	84, 137	3		1	-95	2	83, 136	3
Chr3	22532933	22532934	hy5-1_peak_1523	238.412	1	-191	1	51	2		0		1	51	1
Chr3	22601831	22601832	hy5-1_peak_1524	198.385	1	-17	2	15, 65	3		1	-17	1	14	2
Chr3	22634614	22634615	hy5-1_peak_1525	27.4278	0		1	75	1		0		0		0
Chr3	22653876	22653877	hy5-1_peak_1526	60.272	2	-165, -65	0		2		0		0		0
Chr3	22662810	22662811	hy5-1_peak_1527	9.87294	3	-172, -118, -20	1	87	4		0		1	87	1
Chr3	22676989	22676990	hy5-1_peak_1528	97.6855	2	-180, -75	2	76, 184	4		1	-76	2	76, 184	3
Chr3	22682568	22682569	hy5-1_peak_1529	32.5015	0		0		0		0		0		0
Chr3	22738350	22738351	hy5-1_peak_1530	21.3322	1	-14	0		1		1	-15	0		1
Chr3	22806275	22806276	hy5-1_peak_1531	52.9892	2	-195, -12	1	35	3		1	-12	1	35	2
Chr3	22857107	22857108	hy5-1_peak_1532	67.65	1	-9	1	106	2		1	-9	1	106	2
Chr3	22886634	22886635	hy5-1_peak_1533	88.9411	1	-47	2	5, 140	3		1	-48	1	5	2
Chr3	22906907	22906908	hy5-1_peak_1534	18.9843	1	-4	1	70	2		1	-5	0		1
Chr3	22929449	22929450	hy5-1_peak_1535	139.358	1	-4	0		1		0		0		0
Chr3	22945844	22945845	hy5-1_peak_1536	78.8562	4	-179, -78, -53, -6	0		4		1	-180	0		1
Chr3	22994950	22994951	hy5-1_peak_1537	9.09502	2	-67, -8	2	52, 63	4		2	-9, -67	1	63	3
Chr3	23014439	23014440	hy5-1_peak_1538	74.4231	3	-199, -30, -20	1	57	4		1	-31	1	56	2
Chr3	23040678	23040679	hy5-1_peak_1539	45.7561	1	-5	2	95, 133	3		1	-6	1	94	2
Chr3	23153595	23153596	hy5-1_peak_1540	12.2684	1	-58	3	12, 26, 71	4		1	-58	1	11	2
Chr3	23175712	23175713	hy5-1_peak_1541	8.55564	1	-59	1	78	2		1	-60	0		1
Chr3	23186202	23186203	hy5-1_peak_1542	111.797	2	-30, -4	1	20	3		2	-31, -5	1	19	3
Chr3	23230225	23230226	hy5-1_peak_1543	287.083	1	-33	2	1, 76	3		1	-33	1	1	2
Chr3	23294427	23294428	hy5-1_peak_1544	16.1697	0		2	1, 49	2		0		1	48	1
Chr3	23301712	23301713	hy5-1_peak_1545	38.842	2	-178, -45	5	2, 37, 73, 80, 101	7		1	-179	4	1, 72, 79, 101	5
Chr3	23336719	23336720	hy5-1_peak_1546	301.816	2	-52, -10	0		2		2	-52, -10	0		2
Chr3	23346710	23346711	hy5-1_peak_1547	23.941	1	-109	2	15, 136	3		1	-110	2	14, 135	3
Chr3	23361540	23361541	hy5-1_peak_1548	31.926	1	-44	3	29, 54, 72	4		1	-45	1	71	2
Chr3	23398712	23398713	hy5-1_peak_1549	56.4942	1	-8	1	18	2		1	-8	1	18	2
Chr3	23419951	23419952	hy5-1_peak_1550	238.127	0		1	59	1		0		1	58	1
Chr3	23425631	23425632	hy5-1_peak_1551	8.08396	1	-139	1	4	2		0		0		0
Chr4	10348	10349	hy5-1_peak_1552	311.267	0		1	7	1		0		1	6	1
Chr4	33022	33023	hy5-1_peak_1553	296.231	2	-194, -5	2	27, 90	4		2	-195, -6	2	27, 90	4
Chr4	57601	57602	hy5-1_peak_1554	101.678	1	-88	1	22	2		1	-88	1	21	2
Chr4	68393	68394	hy5-1_peak_1555	101.48	1	-4	0		1		0		0		0
Chr4	131874	131875	hy5-1_peak_1556	12.9406	1	-37	0		1		1	-37	0		1
Chr4	132741	132742	hy5-1_peak_1557	48.2942	2	-197, -20	2	41, 100	4		1	-21	1	100	2
Chr4	162035	162036	hy5-1_peak_1558	342.405	3	-137, -37, -24	3	5, 12, 113	6		2	-138, -25	3	11, 112, 5	5
Chr4	166339	166340	hy5-1_peak_1559	17.0979	1	-33	2	33, 129	3		1	-34	1	32	2
Chr4	189424	189425	hy5-1_peak_1560	43.1065	3	-119, -102, -52	3	12, 154, 173	6		1	-53	1	172	2
Chr4	222187	222188	hy5-1_peak_1561	8.21288	1	-85	3	10, 27, 165	4		1	-85	3	26, 164, 10	4
Chr4	246949	246950	hy5-1_peak_1562	7.82538	0		3	2, 92, 155	3		0		2	1, 91	2
Chr4	259265	259266	hy5-1_peak_1563	8.60029	1	-4	0		1		0		0		0
Chr4	299230	299231	hy5-1_peak_1564	10.4302	3	-136, -46, -10	1	17	4		1	-10	0		1
Chr4	347401	347402	hy5-1_peak_1565	45.2391	0		1	79	1		0		1	78	1
Chr4	357400	357401	hy5-1_peak_1566	16.2825	0		0		0		0		0		0
Chr4	418297	418298	hy5-1_peak_1567	11.7626	4	-185, -33, -19, -14	0		4		3	-186, -20, -15	0		3
Chr4	426888	426889	hy5-1_peak_1568	65.6238	1	-83	1	65	2		0		0		0
Chr4	439898	439899	hy5-1_peak_1569	31.7414	0		2	5, 45	2		0		1	5	1
Chr4	455683	455684	hy5-1_peak_1570	141.403	0		2	2, 43	2		0		2	1, 42	2
Chr4	484574	484575	hy5-1_peak_1571	307.444	2	-20, -8	3	100, 138, 149	5		2	-21, -9	2	99, 149	4
Chr4	586436	586437	hy5-1_peak_1572	12.9247	1	-117	0		1		1	-118	0		1
Chr4	640623	640624	hy5-1_peak_1573	253.613	1	-34	1	82	2		1	-34	1	81	2
Chr4	663126	663127	hy5-1_peak_1574	71.023	4	-181, -122, -53, -19	1	33	5		0		1	32	1
Chr4	744292	744293	hy5-1_peak_1575	26.8252	2	-115, -12	1	25	3		2	-116, -13	1	24	3
Chr4	761569	761570	hy5-1_peak_1576	5.57529	2	-76, -33	0		2		1	-33	0		1
Chr4	776324	776325	hy5-1_peak_1577	55.1627	2	-65, -39	1	12	3		0		1	11	1
Chr4	785802	785803	hy5-1_peak_1578	40.8897	1	-55	0		1		0		0		0
Chr4	808609	808610	hy5-1_peak_1579	55.6786	1	-27	2	4, 42	3		1	-28	1	3	2
Chr4	844868	844869	hy5-1_peak_1580	15.7481	1	-120	0		1		1	-121	0		1
Chr4	879809	879810	hy5-1_peak_1581	251.566	2	-29, -13	2	20, 75	4		1	-30	1	74	2
Chr4	946603	946604	hy5-1_peak_1582	31.8499	2	-20, -13	0		2		1	-13	0		1
Chr4	1033224	1033225	hy5-1_peak_1583	6.87219	0		3	132, 137, 159	3		0		1	132	1
Chr4	1176399	1176400	hy5-1_peak_1584	344.135	3	-71, -10, -4	2	45, 83	5		2	-11, -71	0		2
Chr4	1198162	1198163	hy5-1_peak_1585	47.5513	0		1	22	1		0		1	21	1
Chr4	1306426	1306427	hy5-1_peak_1586	323.65	1	-25	0		1		1	-26	0		1
Chr4	1329354	1329355	hy5-1_peak_1587	14.0029	1	-16	1	24	2		1	-16	1	23	2
Chr4	1394660	1394661	hy5-1_peak_1588	382.29	2	-169, -33	1	21	3		0		0		0
Chr4	1495592	1495593	hy5-1_peak_1589	168.286	3	-124, -28, -6	1	10	4		1	-29	1	9	2
Chr4	1579964	1579965	hy5-1_peak_1590	13.5261	0		2	9, 36	2		0		2	8, 36	2
Chr4	1604091	1604092	hy5-1_peak_1591	21.7573	0		1	52	1		0		1	52	1
Chr4	2464181	2464182	hy5-1_peak_1592	96.9215	1	-23	2	17, 87	3		1	-24	1	16	2
Chr4	2537452	2537453	hy5-1_peak_1593	219.223	2	-173, -103	0		2		1	-104	0		1
Chr4	2589471	2589472	hy5-1_peak_1594	18.153	0		2	2, 16	2		0		2	1, 16	2
Chr4	2660505	2660506	hy5-1_peak_1595	19.6025	0		2	46, 72	2		0		1	45	1
Chr4	2673356	2673357	hy5-1_peak_1596	24.6522	2	-92, -41	2	28, 41	4		2	-93, -42	2	27, 41	4
Chr4	2778688	2778689	hy5-1_peak_1597	19.3672	1	-132	1	26	2		0		0		0
Chr4	2921714	2921715	hy5-1_peak_1598	13.5777	0		0		0		0		0		0
Chr4	2924153	2924154	hy5-1_peak_1599	5.77896	0		0		0		0		0		0
Chr4	2962691	2962692	hy5-1_peak_1600	4.95466	0		0		0		0		0		0
Chr4	2964724	2964725	hy5-1_peak_1601	7.2948	0		0		0		0		0		0
Chr4	3054680	3054681	hy5-1_peak_1602	84.7468	0		0		0		0		0		0
Chr4	3058462	3058463	hy5-1_peak_1603	13.6898	0		0		0		0		0		0
Chr4	3061036	3061037	hy5-1_peak_1604	62.767	0		0		0		0		0		0
Chr4	3358013	3358014	hy5-1_peak_1605	199.091	2	-35, -10	2	21, 191	4		1	-11	1	20	2
Chr4	3655754	3655755	hy5-1_peak_1606	9.13328	0		0		0		0		0		0
Chr4	3737493	3737494	hy5-1_peak_1607	8.31461	0		0		0		0		0		0
Chr4	3850914	3850915	hy5-1_peak_1608	6.47963	0		0		0		0		0		0
Chr4	3952830	3952831	hy5-1_peak_1609	76.0528	0		0		0		0		0		0
Chr4	3965791	3965792	hy5-1_peak_1610	40.9466	0		0		0		0		0		0
Chr4	3966539	3966540	hy5-1_peak_1611	96.8956	0		0		0		0		0		0
Chr4	3967379	3967380	hy5-1_peak_1612	27.8255	0		0		0		0		0		0
Chr4	3969339	3969340	hy5-1_peak_1613	38.7972	0		0		0		0		0		0
Chr4	3971172	3971173	hy5-1_peak_1614	80.6349	0		0		0		0		0		0
Chr4	3972703	3972704	hy5-1_peak_1615	68.2093	0		0		0		0		0		0
Chr4	3976629	3976630	hy5-1_peak_1616	39.418	0		0		0		0		0		0
Chr4	3977848	3977849	hy5-1_peak_1617	66.3904	0		0		0		0		0		0
Chr4	3978872	3978873	hy5-1_peak_1618	23.9851	0		0		0		0		0		0
Chr4	3983515	3983516	hy5-1_peak_1619	23.3063	0		0		0		0		0		0
Chr4	3984508	3984509	hy5-1_peak_1620	124.344	0		0		0		0		0		0
Chr4	3986137	3986138	hy5-1_peak_1621	104.429	0		0		0		0		0		0
Chr4	3998185	3998186	hy5-1_peak_1622	55.1886	0		0		0		0		0		0
Chr4	4000701	4000702	hy5-1_peak_1623	72.9818	0		0		0		0		0		0
Chr4	4007284	4007285	hy5-1_peak_1624	50.7752	0		0		0		0		0		0
Chr4	4008675	4008676	hy5-1_peak_1625	22.8538	0		0		0		0		0		0
Chr4	4009781	4009782	hy5-1_peak_1626	56.169	0		0		0		0		0		0
Chr4	4011177	4011178	hy5-1_peak_1627	38.9569	0		0		0		0		0		0
Chr4	4253947	4253948	hy5-1_peak_1628	83.4825	2	-52, -20	1	32	3		2	-53, -21	1	31	3
Chr4	4480035	4480036	hy5-1_peak_1629	23.0546	3	-122, -72, -12	1	8	4		0		1	8	1
Chr4	5169390	5169391	hy5-1_peak_1630	16.5141	2	-141, -5	0		2		2	-6, -141	0		2
Chr4	5676679	5676680	hy5-1_peak_1631	11.182	0		1	84	1		0		1	83	1
Chr4	5699552	5699553	hy5-1_peak_1632	22.4848	0		0		0		0		0		0
Chr4	5738901	5738902	hy5-1_peak_1633	104.356	2	-37, -16	3	2, 22, 170	5		1	-17	2	21, 2	3
Chr4	5757918	5757919	hy5-1_peak_1634	212.256	2	-43, -5	1	28	3		1	-6	1	27	2
Chr4	5797416	5797417	hy5-1_peak_1635	72.1202	1	-22	4	2, 42, 74, 112	5		0		1	2	1
Chr4	5800412	5800413	hy5-1_peak_1636	65.9629	0		1	8	1		0		1	8	1
Chr4	5843362	5843363	hy5-1_peak_1637	77.1175	0		1	9	1		0		0		0
Chr4	6146568	6146569	hy5-1_peak_1638	184.547	1	-98	2	37, 105	3		1	-98	1	37	2
Chr4	6225450	6225451	hy5-1_peak_1639	13.2761	2	-152, -13	0		2		0		0		0
Chr4	6308622	6308623	hy5-1_peak_1640	190.239	1	-21	1	52	2		0		0		0
Chr4	6488268	6488269	hy5-1_peak_1641	131.257	1	-168	2	1, 24	3		1	-169	2	1, 24	3
Chr4	6614960	6614961	hy5-1_peak_1642	237.014	1	-5	1	31	2		1	-5	1	30	2
Chr4	6711160	6711161	hy5-1_peak_1643	30.1424	1	-5	2	103, 156	3		0		1	102	1
Chr4	6901353	6901354	hy5-1_peak_1644	283.716	2	-102, -4	1	27	3		0		1	26	1
Chr4	7004099	7004100	hy5-1_peak_1645	268.159	2	-41, -22	2	3, 86	4		2	-23, -41	2	85, 3	4
Chr4	7011464	7011465	hy5-1_peak_1646	148.323	1	-25	2	33, 71	3		1	-26	0		1
Chr4	7100859	7100860	hy5-1_peak_1647	22.9295	1	-11	2	30, 191	3		1	-11	2	190, 30	3
Chr4	7103347	7103348	hy5-1_peak_1648	11.984	1	-23	3	11, 19, 78	4		0		1	18	1
Chr4	7114053	7114054	hy5-1_peak_1649	283.602	0		2	2, 70	2		0		1	69	1
Chr4	7128205	7128206	hy5-1_peak_1650	7.9727	2	-190, -58	1	1	3		1	-59	0		1
Chr4	7196310	7196311	hy5-1_peak_1651	10.6013	1	-41	1	33	2		1	-42	1	33	2
Chr4	7247536	7247537	hy5-1_peak_1652	50.4643	2	-68, -26	1	26	3		1	-69	1	25	2
Chr4	7263531	7263532	hy5-1_peak_1653	98.0702	1	-32	2	2, 14	3		1	-33	2	1, 13	3
Chr4	7319334	7319335	hy5-1_peak_1654	16.9925	3	-139, -46, -20	1	2	4		2	-139, -46	0		2
Chr4	7369619	7369620	hy5-1_peak_1655	168.93	2	-44, -8	2	35, 64	4		1	-9	2	34, 63	3
Chr4	7419028	7419029	hy5-1_peak_1656	50.9983	1	-5	1	18	2		1	-6	1	18	2
Chr4	7422912	7422913	hy5-1_peak_1657	37.4667	1	-23	0		1		1	-24	0		1
Chr4	7475017	7475018	hy5-1_peak_1658	101.663	1	-13	1	8	2		1	-14	1	7	2
Chr4	7491589	7491590	hy5-1_peak_1659	54.0106	2	-200, -91	1	1	3		1	-91	0		1
Chr4	7553484	7553485	hy5-1_peak_1660	100.428	0		2	7, 144	2		0		1	6	1
Chr4	7600535	7600536	hy5-1_peak_1661	374.539	1	-71	1	5	2		1	-71	1	5	2
Chr4	7620476	7620477	hy5-1_peak_1662	20.6493	1	-8	0		1		1	-9	0		1
Chr4	7665034	7665035	hy5-1_peak_1663	5.54844	1	-120	2	26, 78	3		1	-121	0		1
Chr4	7791375	7791376	hy5-1_peak_1664	52.1717	1	-185	1	6	2		0		1	5	1
Chr4	7797593	7797594	hy5-1_peak_1665	23.1179	2	-33, -5	1	145	3		1	-34	0		1
Chr4	7865803	7865804	hy5-1_peak_1666	173.151	0		1	6	1		0		1	5	1
Chr4	7926353	7926354	hy5-1_peak_1667	50.1989	2	-29, -5	2	14, 196	4		2	-30, -5	1	195	3
Chr4	7963618	7963619	hy5-1_peak_1668	138.527	1	-62	1	34	2		1	-63	1	33	2
Chr4	8017114	8017115	hy5-1_peak_1669	15.5348	1	-24	1	8	2		1	-24	1	7	2
Chr4	8020831	8020832	hy5-1_peak_1670	38.3519	1	-35	1	10	2		1	-35	1	9	2
Chr4	8054666	8054667	hy5-1_peak_1671	17.2402	0		0		0		0		0		0
Chr4	8240621	8240622	hy5-1_peak_1672	10.2443	1	-28	3	12, 144, 194	4		1	-29	3	11, 143, 194	4
Chr4	8303992	8303993	hy5-1_peak_1673	12.3423	0		2	15, 32	2		0		1	14	1
Chr4	8334068	8334069	hy5-1_peak_1674	201.766	2	-112, -63	2	4, 51	4		1	-112	1	3	2
Chr4	8389319	8389320	hy5-1_peak_1675	103.657	1	-4	1	22	2		1	-5	0		1
Chr4	8405671	8405672	hy5-1_peak_1676	130.531	0		1	5	1		0		1	5	1
Chr4	8429719	8429720	hy5-1_peak_1677	55.3845	0		1	11	1		0		1	10	1
Chr4	8575336	8575337	hy5-1_peak_1678	14.0868	4	-193, -116, -81, -4	0		4		1	-194	0		1
Chr4	8634874	8634875	hy5-1_peak_1679	57.7268	0		3	1, 54, 75	3		0		2	53, 74	2
Chr4	8671365	8671366	hy5-1_peak_1680	27.2063	0		1	164	1		0		1	164	1
Chr4	8714843	8714844	hy5-1_peak_1681	117.65	1	-189	2	5, 79	3		0		1	5	1
Chr4	8717094	8717095	hy5-1_peak_1682	137.16	0		0		0		0		0		0
Chr4	8720328	8720329	hy5-1_peak_1683	38.6001	1	-4	2	172, 184	3		0		1	184	1
Chr4	8793901	8793902	hy5-1_peak_1684	6.55522	2	-29, -15	0		2		2	-30, -16	0		2
Chr4	8843503	8843504	hy5-1_peak_1685	14.8441	0		1	13	1		0		1	12	1
Chr4	8869527	8869528	hy5-1_peak_1686	11.3753	0		0		0		0		0		0
Chr4	8878994	8878995	hy5-1_peak_1687	27.9956	1	-5	1	120	2		1	-6	0		1
Chr4	8913751	8913752	hy5-1_peak_1688	203.052	1	-4	1	16	2		1	-5	0		1
Chr4	9157397	9157398	hy5-1_peak_1689	7.59408	4	-147, -140, -48, -29	2	18, 37	6		3	-148, -141, -30	2	17, 36	5
Chr4	9200791	9200792	hy5-1_peak_1690	6.4127	2	-192, -179	2	27, 144	4		1	-193	0		1
Chr4	9227535	9227536	hy5-1_peak_1691	161.96	0		2	6, 83	2		0		2	6, 83	2
Chr4	9255907	9255908	hy5-1_peak_1692	22.1911	1	-11	2	140, 179	3		1	-12	1	140	2
Chr4	9302114	9302115	hy5-1_peak_1693	18.5019	1	-29	2	27, 123	3		1	-30	1	26	2
Chr4	9319836	9319837	hy5-1_peak_1694	20.079	0		2	46, 125	2		0		1	45	1
Chr4	9350296	9350297	hy5-1_peak_1695	32.415	2	-32, -22	2	11, 47	4		1	-23	1	10	2
Chr4	9367561	9367562	hy5-1_peak_1696	21.1638	0		1	173	1		0		1	172	1
Chr4	9368336	9368337	hy5-1_peak_1697	272.491	3	-124, -94, -46	2	1, 15	5		2	-125, -46	2	1, 15	4
Chr4	9376630	9376631	hy5-1_peak_1698	13.2943	1	-7	2	10, 52	3		1	-8	2	9, 51	3
Chr4	9461243	9461244	hy5-1_peak_1699	7.99646	1	-4	2	98, 161	3		0		2	97, 161	2
Chr4	9468156	9468157	hy5-1_peak_1700	370.832	2	-59, -9	3	26, 77, 157	5		2	-60, -10	2	156, 77	4
Chr4	9563666	9563667	hy5-1_peak_1701	31.2567	1	-19	0		1		1	-20	0		1
Chr4	9585486	9585487	hy5-1_peak_1702	68.6174	2	-103, -15	2	2, 168	4		1	-16	1	167	2
Chr4	9612590	9612591	hy5-1_peak_1703	111.797	1	-114	2	7, 47	3		1	-115	0		1
Chr4	9731670	9731671	hy5-1_peak_1704	11.411	1	-20	2	3, 55	3		1	-21	2	2, 54	3
Chr4	9775582	9775583	hy5-1_peak_1705	24.9782	2	-35, -5	1	72	3		1	-5	1	72	2
Chr4	9779973	9779974	hy5-1_peak_1706	25.326	0		2	1, 100	2		0		2	1, 100	2
Chr4	9837581	9837582	hy5-1_peak_1707	66.4036	1	-18	1	14	2		1	-19	1	13	2
Chr4	9896327	9896328	hy5-1_peak_1708	38.7038	2	-155, -136	2	3, 63	4		1	-156	0		1
Chr4	9977397	9977398	hy5-1_peak_1709	94.639	3	-106, -75, -51	0		3		2	-76, -52	0		2
Chr4	9992038	9992039	hy5-1_peak_1710	60.7779	4	-122, -108, -21, -5	1	81	5		1	-6	0		1
Chr4	10003724	10003725	hy5-1_peak_1711	83.2743	1	-27	1	11	2		0		1	10	1
Chr4	10091306	10091307	hy5-1_peak_1712	30.8987	2	-91, -7	2	2, 174	4		1	-7	1	173	2
Chr4	10259565	10259566	hy5-1_peak_1713	16.3296	1	-134	2	2, 29	3		1	-135	2	28, 2	3
Chr4	10291723	10291724	hy5-1_peak_1714	26.1937	2	-54, -11	2	65, 144	4		1	-12	2	64, 143	3
Chr4	10368651	10368652	hy5-1_peak_1715	343.121	1	-37	2	10, 33	3		1	-38	2	32, 10	3
Chr4	10398343	10398344	hy5-1_peak_1716	16.7212	1	-49	3	51, 76, 90	4		1	-50	2	75, 89	3
Chr4	10437822	10437823	hy5-1_peak_1717	83.713	0		3	9, 26, 49	3		0		2	25, 9	2
Chr4	10572229	10572230	hy5-1_peak_1718	12.8089	1	-9	3	63, 130, 149	4		1	-10	1	62	2
Chr4	10591151	10591152	hy5-1_peak_1719	16.5388	0		2	12, 77	2		0		2	11, 77	2
Chr4	10647086	10647087	hy5-1_peak_1720	9.97332	0		2	84, 115	2		0		2	84, 115	2
Chr4	10657287	10657288	hy5-1_peak_1721	15.5375	3	-80, -76, -6	0		3		0		0		0
Chr4	10661263	10661264	hy5-1_peak_1722	29.2947	0		2	8, 42	2		0		2	7, 41	2
Chr4	10724839	10724840	hy5-1_peak_1723	26.2863	3	-38, -28, -9	0		3		1	-10	0		1
Chr4	10767045	10767046	hy5-1_peak_1724	11.182	2	-88, -7	1	187	3		2	-89, -7	0		2
Chr4	10861308	10861309	hy5-1_peak_1725	17.0404	0		2	17, 46	2		0		1	16	1
Chr4	10931014	10931015	hy5-1_peak_1726	29.8677	1	-9	1	4	2		0		0		0
Chr4	11003384	11003385	hy5-1_peak_1727	30.8827	0		1	183	1		0		0		0
Chr4	11045068	11045069	hy5-1_peak_1728	13.0043	2	-131, -7	3	38, 91, 159	5		1	-7	2	38, 159	3
Chr4	11115171	11115172	hy5-1_peak_1729	10.9029	3	-162, -94, -41	2	4, 128	5		2	-163, -42	1	3	3
Chr4	11129135	11129136	hy5-1_peak_1730	40.1496	0		2	1, 192	2		0		0		0
Chr4	11186211	11186212	hy5-1_peak_1731	59.0194	1	-165	1	1	2		0		0		0
Chr4	11228092	11228093	hy5-1_peak_1732	6.4821	3	-161, -18, -12	2	1, 56	5		2	-162, -19	1	1	3
Chr4	11240559	11240560	hy5-1_peak_1733	11.9042	1	-41	2	3, 23	3		1	-42	0		1
Chr4	11288781	11288782	hy5-1_peak_1734	11.2884	2	-114, -18	1	48	3		0		1	48	1
Chr4	11334287	11334288	hy5-1_peak_1735	246.195	2	-100, -18	1	11	3		1	-19	1	10	2
Chr4	11340343	11340344	hy5-1_peak_1736	315.487	3	-150, -29, -21	1	12	4		1	-29	1	12	2
Chr4	11417412	11417413	hy5-1_peak_1737	20.5234	2	-137, -99	2	8, 87	4		2	-138, -100	2	7, 86	4
Chr4	11420979	11420980	hy5-1_peak_1738	21.78	1	-192	1	5	2		0		1	4	1
Chr4	11459465	11459466	hy5-1_peak_1739	374.078	1	-30	0		1		1	-31	0		1
Chr4	11484713	11484714	hy5-1_peak_1740	8.04822	1	-65	1	2	2		1	-66	1	1	2
Chr4	11621820	11621821	hy5-1_peak_1741	229.465	2	-19, -6	6	12, 20, 137, 149, 185, 189	8		2	-20, -6	2	19, 148	4
Chr4	11626467	11626468	hy5-1_peak_1742	72.3474	1	-10	1	21	2		1	-11	0		1
Chr4	11638986	11638987	hy5-1_peak_1743	31.0841	2	-50, -42	1	4	3		1	-51	1	3	2
Chr4	11640267	11640268	hy5-1_peak_1744	230.914	1	-107	4	47, 109, 120, 182	5		1	-108	2	47, 120	3
Chr4	11760896	11760897	hy5-1_peak_1745	7.02821	5	-173, -143, -113, -63, -58	1	120	6		1	-63	1	119	2
Chr4	11897147	11897148	hy5-1_peak_1746	380.969	4	-80, -55, -49, -7	2	16, 24	6		2	-50, -8	1	23	3
Chr4	11922680	11922681	hy5-1_peak_1747	22.7653	0		1	35	1		0		1	34	1
Chr4	11956837	11956838	hy5-1_peak_1748	68.7191	1	-93	1	11	2		1	-93	1	11	2
Chr4	12171432	12171433	hy5-1_peak_1749	55.1538	1	-44	1	7	2		0		0		0
Chr4	12224814	12224815	hy5-1_peak_1750	15.7034	1	-53	3	44, 73, 105	4		0		1	43	1
Chr4	12254664	12254665	hy5-1_peak_1751	103.859	1	-24	2	40, 168	3		1	-25	1	167	2
Chr4	12268676	12268677	hy5-1_peak_1752	11.0933	0		1	16	1		0		1	15	1
Chr4	12279768	12279769	hy5-1_peak_1753	6.80056	2	-182, -16	1	113	3		0		1	112	1
Chr4	12317689	12317690	hy5-1_peak_1754	48.4106	4	-193, -168, -107, -72	3	24, 30, 49	7		2	-73, -107	1	23	3
Chr4	12327491	12327492	hy5-1_peak_1755	9.67639	1	-150	2	25, 46	3		0		1	24	1
Chr4	12332846	12332847	hy5-1_peak_1756	112.515	1	-194	2	13, 184	3		0		2	183, 13	2
Chr4	12377584	12377585	hy5-1_peak_1757	68.0779	0		0		0		0		0		0
Chr4	12416539	12416540	hy5-1_peak_1758	220.739	1	-18	2	16, 108	3		1	-19	0		1
Chr4	12455907	12455908	hy5-1_peak_1759	12.9238	1	-6	2	36, 61	3		0		0		0
Chr4	12514879	12514880	hy5-1_peak_1760	92.1751	1	-21	1	14	2		1	-22	1	13	2
Chr4	12526504	12526505	hy5-1_peak_1761	20.239	1	-9	0		1		0		0		0
Chr4	12556061	12556062	hy5-1_peak_1762	15.2491	1	-38	3	38, 48, 127	4		1	-38	2	38, 48	3
Chr4	12570010	12570011	hy5-1_peak_1763	21.3826	1	-7	2	26, 33	3		1	-7	1	25	2
Chr4	12649853	12649854	hy5-1_peak_1764	58.5656	1	-15	1	17	2		1	-16	1	17	2
Chr4	12694588	12694589	hy5-1_peak_1765	75.7382	0		1	9	1		0		1	8	1
Chr4	12724951	12724952	hy5-1_peak_1766	20.5931	1	-4	0		1		1	-5	0		1
Chr4	12775842	12775843	hy5-1_peak_1767	25.9045	1	-97	2	1, 46	3		0		1	1	1
Chr4	12900303	12900304	hy5-1_peak_1768	17.452	1	-31	2	33, 67	3		1	-31	2	32, 66	3
Chr4	13006039	13006040	hy5-1_peak_1769	54.5441	0		3	6, 18, 51	3		0		1	17	1
Chr4	13014058	13014059	hy5-1_peak_1770	227.698	1	-29	4	4, 9, 70, 83	5		1	-30	0		1
Chr4	13021931	13021932	hy5-1_peak_1771	35.8208	0		1	9	1		0		1	8	1
Chr4	13056106	13056107	hy5-1_peak_1772	31.0927	0		2	16, 28	2		0		2	27, 16	2
Chr4	13069597	13069598	hy5-1_peak_1773	359.9	1	-7	0		1		1	-8	0		1
Chr4	13138977	13138978	hy5-1_peak_1774	19.8966	0		3	3, 16, 23	3		0		2	15, 22	2
Chr4	13145376	13145377	hy5-1_peak_1775	45.5523	1	-4	2	73, 94	3		0		1	72	1
Chr4	13151701	13151702	hy5-1_peak_1776	63.8324	0		1	1	1		0		1	1	1
Chr4	13194590	13194591	hy5-1_peak_1777	294.7	1	-8	1	34	2		1	-8	1	34	2
Chr4	13209294	13209295	hy5-1_peak_1778	141.958	0		1	2	1		0		1	2	1
Chr4	13223534	13223535	hy5-1_peak_1779	285.059	2	-66, -29	1	6	3		2	-67, -30	1	6	3
Chr4	13240841	13240842	hy5-1_peak_1780	7.99646	1	-27	0		1		0		0		0
Chr4	13276406	13276407	hy5-1_peak_1781	67.8752	0		1	5	1		0		1	5	1
Chr4	13300930	13300931	hy5-1_peak_1782	12.2684	2	-135, -14	2	8, 23	4		1	-14	2	8, 23	3
Chr4	13361881	13361882	hy5-1_peak_1783	65.9446	1	-179	1	6	2		0		1	6	1
Chr4	13375769	13375770	hy5-1_peak_1784	19.8749	1	-58	1	9	2		0		0		0
Chr4	13462974	13462975	hy5-1_peak_1785	315.145	1	-38	3	6, 27, 182	4		1	-39	2	26, 6	3
Chr4	13511380	13511381	hy5-1_peak_1786	8.9404	2	-100, -5	1	77	3		1	-6	0		1
Chr4	13526862	13526863	hy5-1_peak_1787	3.37604	4	-124, -99, -36, -18	1	81	5		1	-19	1	81	2
Chr4	13675113	13675114	hy5-1_peak_1788	272.875	3	-143, -90, -53	2	1, 66	5		3	-91, -54, -143	1	65	4
Chr4	13683143	13683144	hy5-1_peak_1789	6.80056	0		2	49, 136	2		0		1	49	1
Chr4	13725447	13725448	hy5-1_peak_1790	35.7374	0		1	15	1		0		1	15	1
Chr4	13806741	13806742	hy5-1_peak_1791	47.7519	1	-32	0		1		1	-32	0		1
Chr4	13812929	13812930	hy5-1_peak_1792	35.3295	1	-12	1	33	2		1	-13	1	33	2
Chr4	13866494	13866495	hy5-1_peak_1793	43.0153	2	-58, -7	0		2		2	-59, -8	0		2
Chr4	14009495	14009496	hy5-1_peak_1794	21.4845	0		0		0		0		0		0
Chr4	14078053	14078054	hy5-1_peak_1795	79.5931	2	-121, -12	3	30, 37, 174	5		0		2	29, 174	2
Chr4	14088889	14088890	hy5-1_peak_1796	23.8215	1	-84	1	191	2		1	-85	0		1
Chr4	14118756	14118757	hy5-1_peak_1797	8.53912	2	-170, -153	1	52	3		0		0		0
Chr4	14149863	14149864	hy5-1_peak_1798	12.3737	1	-146	1	48	2		1	-147	1	47	2
Chr4	14192144	14192145	hy5-1_peak_1799	13.8477	3	-59, -43, -23	1	143	4		3	-60, -44, -24	1	142	4
Chr4	14204059	14204060	hy5-1_peak_1800	342.837	1	-11	1	30	2		1	-12	1	30	2
Chr4	14246154	14246155	hy5-1_peak_1801	283.45	0		3	6, 29, 77	3		0		2	28, 6	2
Chr4	14280887	14280888	hy5-1_peak_1802	5.15773	0		0		0		0		0		0
Chr4	14331110	14331111	hy5-1_peak_1803	16.0074	0		0		0		0		0		0
Chr4	14360815	14360816	hy5-1_peak_1804	28.6831	1	-23	2	1, 189	3		1	-24	0		1
Chr4	14389073	14389074	hy5-1_peak_1805	43.3197	3	-167, -29, -4	2	81, 93	5		2	-168, -30	0		2
Chr4	14397689	14397690	hy5-1_peak_1806	73.4673	4	-153, -148, -122, -102	3	1, 95, 109	7		3	-123, -103, -148	2	94, 1	5
Chr4	14444732	14444733	hy5-1_peak_1807	114.751	2	-21, -14	1	14	3		2	-15, -21	1	14	3
Chr4	14466193	14466194	hy5-1_peak_1808	13.5261	0		1	2	1		0		1	1	1
Chr4	14479134	14479135	hy5-1_peak_1809	27.7704	1	-87	2	10, 59	3		0		2	9, 58	2
Chr4	14525653	14525654	hy5-1_peak_1810	14.5848	1	-27	1	27	2		1	-28	0		1
Chr4	14566785	14566786	hy5-1_peak_1811	39.9311	1	-60	6	5, 109, 139, 167, 182, 196	7		1	-60	1	5	2
Chr4	14627685	14627686	hy5-1_peak_1812	39.9895	1	-179	0		1		0		0		0
Chr4	14656197	14656198	hy5-1_peak_1813	16.0768	2	-118, -8	2	4, 196	4		1	-9	1	4	2
Chr4	14662438	14662439	hy5-1_peak_1814	25.4426	0		1	3	1		0		1	2	1
Chr4	14665291	14665292	hy5-1_peak_1815	43.4132	0		0		0		0		0		0
Chr4	14692565	14692566	hy5-1_peak_1816	29.7778	1	-24	1	12	2		1	-24	1	12	2
Chr4	14812692	14812693	hy5-1_peak_1817	93.2534	2	-156, -141	1	10	3		2	-157, -141	1	10	3
Chr4	14902707	14902708	hy5-1_peak_1818	9.95785	1	-109	3	13, 21, 190	4		1	-109	3	12, 20, 190	4
Chr4	15017521	15017522	hy5-1_peak_1819	21.6406	0		1	1	1		0		1	1	1
Chr4	15022528	15022529	hy5-1_peak_1820	21.6406	1	-12	1	18	2		0		1	17	1
Chr4	15202124	15202125	hy5-1_peak_1821	172.329	0		1	1	1		0		0		0
Chr4	15205370	15205371	hy5-1_peak_1822	19.5535	0		1	86	1		0		1	85	1
Chr4	15277580	15277581	hy5-1_peak_1823	180.855	4	-118, -106, -35, -11	2	2, 35	6		1	-12	1	2	2
Chr4	15380054	15380055	hy5-1_peak_1824	160.414	2	-43, -5	1	10	3		0		0		0
Chr4	15458702	15458703	hy5-1_peak_1825	134.524	1	-4	0		1		1	-5	0		1
Chr4	15646778	15646779	hy5-1_peak_1826	59.086	0		2	3, 84	2		0		2	83, 3	2
Chr4	15675333	15675334	hy5-1_peak_1827	115.504	1	-13	2	7, 41	3		1	-14	2	6, 40	3
Chr4	15676235	15676236	hy5-1_peak_1828	36.4334	0		0		0		0		0		0
Chr4	15752298	15752299	hy5-1_peak_1829	17.171	0		2	12, 80	2		0		1	80	1
Chr4	15780331	15780332	hy5-1_peak_1830	58.1339	0		1	1	1		0		0		0
Chr4	15798961	15798962	hy5-1_peak_1831	10.8167	0		1	65	1		0		1	64	1
Chr4	15856832	15856833	hy5-1_peak_1832	15.2953	2	-41, -5	3	20, 127, 160	5		1	-42	1	20	2
Chr4	15872942	15872943	hy5-1_peak_1833	22.2141	1	-34	0		1		1	-35	0		1
Chr4	15941060	15941061	hy5-1_peak_1834	16.7841	1	-38	3	113, 127, 181	4		1	-38	0		1
Chr4	16102320	16102321	hy5-1_peak_1835	197.7	3	-102, -77, -44	2	30, 98	5		1	-44	1	29	2
Chr4	16134632	16134633	hy5-1_peak_1836	79.4668	3	-195, -28, -22	4	42, 111, 132, 180	7		1	-23	0		1
Chr4	16155631	16155632	hy5-1_peak_1837	11.3879	1	-12	0		1		1	-13	0		1
Chr4	16167169	16167170	hy5-1_peak_1838	209.906	1	-8	1	47	2		1	-9	1	46	2
Chr4	16179597	16179598	hy5-1_peak_1839	119.227	3	-80, -30, -26	0		3		2	-80, -26	0		2
Chr4	16220618	16220619	hy5-1_peak_1840	21.0308	1	-97	0		1		1	-98	0		1
Chr4	16230435	16230436	hy5-1_peak_1841	9.70809	2	-77, -62	2	3, 175	4		0		1	2	1
Chr4	16256166	16256167	hy5-1_peak_1842	412.929	2	-37, -10	3	8, 50, 132	5		1	-38	2	7, 49	3
Chr4	16285143	16285144	hy5-1_peak_1843	55.5554	1	-15	1	4	2		1	-16	1	3	2
Chr4	16311507	16311508	hy5-1_peak_1844	14.668	1	-12	1	10	2		0		0		0
Chr4	16344939	16344940	hy5-1_peak_1845	73.447	2	-25, -13	2	6, 18	4		0		0		0
Chr4	16389192	16389193	hy5-1_peak_1846	11.6939	3	-125, -55, -47	1	45	4		2	-48, -55	1	44	3
Chr4	16451788	16451789	hy5-1_peak_1847	11.4885	3	-88, -46, -18	1	23	4		1	-47	1	22	2
Chr4	16482426	16482427	hy5-1_peak_1848	188.647	1	-8	2	43, 95	3		0		1	43	1
Chr4	16528347	16528348	hy5-1_peak_1849	7.02738	1	-167	0		1		1	-167	0		1
Chr4	16599218	16599219	hy5-1_peak_1850	18.2756	0		1	1	1		0		0		0
Chr4	16636099	16636100	hy5-1_peak_1851	192.044	2	-62, -7	1	25	3		1	-63	0		1
Chr4	16638132	16638133	hy5-1_peak_1852	137.206	2	-88, -23	0		2		1	-89	0		1
Chr4	16654093	16654094	hy5-1_peak_1853	23.3476	1	-135	1	1	2		0		0		0
Chr4	16695437	16695438	hy5-1_peak_1854	17.9242	0		1	33	1		0		1	33	1
Chr4	16697565	16697566	hy5-1_peak_1855	13.2659	1	-14	1	6	2		0		1	5	1
Chr4	16704249	16704250	hy5-1_peak_1856	246.847	1	-83	2	1, 24	3		0		2	23, 1	2
Chr4	16736846	16736847	hy5-1_peak_1857	99.0084	0		2	45, 72	2		0		0		0
Chr4	16740705	16740706	hy5-1_peak_1858	229.473	1	-7	1	23	2		0		0		0
Chr4	16773343	16773344	hy5-1_peak_1859	64.6403	2	-173, -113	1	2	3		1	-114	1	1	2
Chr4	16854308	16854309	hy5-1_peak_1860	31.3514	0		1	61	1		0		1	60	1
Chr4	16881955	16881956	hy5-1_peak_1861	27.9773	0		1	6	1		0		0		0
Chr4	16914117	16914118	hy5-1_peak_1862	85.6715	1	-5	2	7, 12	3		1	-5	1	11	2
Chr4	16951402	16951403	hy5-1_peak_1863	220.609	1	-10	2	81, 85	3		1	-10	0		1
Chr4	16983290	16983291	hy5-1_peak_1864	243.152	1	-96	3	3, 14, 34	4		1	-97	3	2, 13, 33	4
Chr4	17009640	17009641	hy5-1_peak_1865	14.0797	1	-10	0		1		0		0		0
Chr4	17040259	17040260	hy5-1_peak_1866	75.4126	1	-17	1	93	2		0		1	92	1
Chr4	17048753	17048754	hy5-1_peak_1867	8.29686	0		1	142	1		0		0		0
Chr4	17115061	17115062	hy5-1_peak_1868	33.8899	1	-24	1	15	2		1	-24	1	14	2
Chr4	17221562	17221563	hy5-1_peak_1869	367.837	0		1	31	1		0		1	30	1
Chr4	17263470	17263471	hy5-1_peak_1870	293.754	3	-100, -46, -5	3	15, 34, 190	6		3	-101, -47, -6	2	14, 33	5
Chr4	17300449	17300450	hy5-1_peak_1871	252.662	0		2	19, 141	2		0		1	18	1
Chr4	17319150	17319151	hy5-1_peak_1872	154.064	1	-4	1	49	2		1	-5	1	48	2
Chr4	17346686	17346687	hy5-1_peak_1873	94.5221	2	-195, -59	2	15, 47	4		2	-196, -60	1	15	3
Chr4	17354428	17354429	hy5-1_peak_1874	109.367	1	-158	1	1	2		0		0		0
Chr4	17370036	17370037	hy5-1_peak_1875	35.8604	0		2	2, 69	2		0		2	68, 2	2
Chr4	17373587	17373588	hy5-1_peak_1876	198.301	1	-38	2	15, 48	3		1	-39	1	48	2
Chr4	17393395	17393396	hy5-1_peak_1877	23.2123	1	-4	0		1		1	-5	0		1
Chr4	17441728	17441729	hy5-1_peak_1878	12.8438	1	-72	1	15	2		1	-72	1	14	2
Chr4	17502521	17502522	hy5-1_peak_1879	18.131	3	-91, -36, -10	1	56	4		1	-92	1	55	2
Chr4	17514916	17514917	hy5-1_peak_1880	11.9907	1	-11	1	25	2		1	-12	1	25	2
Chr4	17522872	17522873	hy5-1_peak_1881	106.37	1	-42	4	12, 90, 165, 177	5		1	-42	2	11, 89	3
Chr4	17573917	17573918	hy5-1_peak_1882	19.1488	1	-7	0		1		1	-7	0		1
Chr4	17579493	17579494	hy5-1_peak_1883	65.966	2	-121, -47	2	99, 114	4		2	-122, -47	2	98, 114	4
Chr4	17594217	17594218	hy5-1_peak_1884	134.112	4	-198, -184, -44, -11	2	67, 92	6		2	-199, -185	1	67	3
Chr4	17619164	17619165	hy5-1_peak_1885	250.25	2	-168, -6	1	19	3		2	-169, -6	1	18	3
Chr4	17813143	17813144	hy5-1_peak_1886	48.3982	2	-175, -125	3	9, 65, 123	5		2	-176, -126	3	122, 9, 65	5
Chr4	17814108	17814109	hy5-1_peak_1887	28.4112	4	-168, -86, -33, -27	1	34	5		1	-28	0		1
Chr4	17858451	17858452	hy5-1_peak_1888	150.856	2	-137, -10	2	59, 176	4		0		2	58, 175	2
Chr4	17875121	17875122	hy5-1_peak_1889	26.8604	0		1	6	1		0		1	5	1
Chr4	17913381	17913382	hy5-1_peak_1890	29.8677	2	-138, -10	1	34	3		2	-139, -11	1	33	3
Chr4	17979847	17979848	hy5-1_peak_1891	7.02738	2	-11, -6	1	180	3		2	-12, -7	1	180	3
Chr4	18072999	18073000	hy5-1_peak_1892	55.8873	1	-5	0		1		1	-6	0		1
Chr4	18077034	18077035	hy5-1_peak_1893	35.8928	0		1	2	1		0		1	1	1
Chr4	18119964	18119965	hy5-1_peak_1894	182.804	0		1	2	1		0		1	2	1
Chr4	18144250	18144251	hy5-1_peak_1895	12.0116	1	-39	2	47, 167	3		1	-40	1	47	2
Chr4	18152001	18152002	hy5-1_peak_1896	26.6035	2	-18, -7	2	3, 30	4		2	-19, -8	1	3	3
Chr4	18170800	18170801	hy5-1_peak_1897	19.5046	0		0		0		0		0		0
Chr4	18220409	18220410	hy5-1_peak_1898	255.641	1	-45	2	38, 178	3		1	-46	1	37	2
Chr4	18233261	18233262	hy5-1_peak_1899	199.73	2	-10, -5	1	54	3		2	-11, -6	0		2
Chr4	18321565	18321566	hy5-1_peak_1900	368.113	1	-20	1	21	2		1	-20	1	20	2
Chr4	18385423	18385424	hy5-1_peak_1901	60.3563	1	-19	0		1		0		0		0
Chr4	18406644	18406645	hy5-1_peak_1902	296.577	1	-125	1	8	2		1	-126	1	7	2
Chr4	18423412	18423413	hy5-1_peak_1903	18.8702	4	-185, -169, -47, -11	0		4		3	-48, -169, -11	0		3
Chr4	18430561	18430562	hy5-1_peak_1904	9.84784	0		3	6, 72, 176	3		0		3	175, 6, 72	3
Chr4	18453883	18453884	hy5-1_peak_1905	112.5	0		0		0		0		0		0
Chr4	18472157	18472158	hy5-1_peak_1906	96.7921	3	-176, -49, -33	3	7, 29, 108	6		3	-50, -34, -176	2	6, 28	5
Chr4	18486492	18486493	hy5-1_peak_1907	29.4143	3	-195, -162, -36	1	39	4		1	-36	1	38	2
Chr4	18520619	18520620	hy5-1_peak_1908	23.5188	0		3	5, 102, 114	3		0		0		0
Chr4	18552382	18552383	hy5-1_peak_1909	36.9935	1	-6	1	102	2		1	-6	1	102	2
Chr4	18576540	18576541	hy5-1_peak_1910	14.219	0		1	42	1		0		1	41	1
Chr5	14352	14353	hy5-1_peak_1911	142.018	1	-126	0		1		1	-127	0		1
Chr5	77283	77284	hy5-1_peak_1912	17.2134	1	-84	2	35, 185	3		1	-85	0		1
Chr5	85191	85192	hy5-1_peak_1913	33.8443	1	-103	0		1		0		0		0
Chr5	159358	159359	hy5-1_peak_1914	16.1685	1	-26	2	2, 168	3		1	-27	1	1	2
Chr5	206126	206127	hy5-1_peak_1915	66.2893	3	-194, -181, -17	3	8, 30, 143	6		2	-195, -18	2	29, 142	4
Chr5	211082	211083	hy5-1_peak_1916	176.929	2	-111, -47	1	6	3		0		0		0
Chr5	240902	240903	hy5-1_peak_1917	352.226	0		0		0		0		0		0
Chr5	250241	250242	hy5-1_peak_1918	32.8133	1	-33	0		1		0		0		0
Chr5	390156	390157	hy5-1_peak_1919	100.069	0		1	5	1		0		0		0
Chr5	412767	412768	hy5-1_peak_1920	304.68	1	-16	2	9, 21	3		1	-16	2	8, 21	3
Chr5	469207	469208	hy5-1_peak_1921	333.52	2	-108, -34	2	5, 27	4		1	-35	1	27	2
Chr5	526357	526358	hy5-1_peak_1922	14.7133	1	-21	1	14	2		1	-22	1	13	2
Chr5	573354	573355	hy5-1_peak_1923	17.7067	1	-6	0		1		1	-6	0		1
Chr5	577261	577262	hy5-1_peak_1924	11.5485	1	-42	2	12, 155	3		0		2	154, 12	2
Chr5	579295	579296	hy5-1_peak_1925	15.1997	3	-70, -49, -26	1	54	4		2	-50, -27	1	53	3
Chr5	620842	620843	hy5-1_peak_1926	40.5106	1	-135	2	6, 100	3		0		2	5, 99	2
Chr5	632781	632782	hy5-1_peak_1927	80.3175	0		1	30	1		0		0		0
Chr5	642170	642171	hy5-1_peak_1928	66.2312	3	-77, -61, -15	2	57, 80	5		2	-62, -15	1	56	3
Chr5	690693	690694	hy5-1_peak_1929	50.3301	1	-14	2	4, 10	3		1	-15	1	9	2
Chr5	749982	749983	hy5-1_peak_1930	27.4991	1	-41	2	59, 87	3		1	-41	2	58, 87	3
Chr5	767031	767032	hy5-1_peak_1931	41.9055	1	-11	2	5, 46	3		1	-12	2	5, 46	3
Chr5	793418	793419	hy5-1_peak_1932	164.277	2	-38, -5	1	25	3		2	-39, -6	0		2
Chr5	942320	942321	hy5-1_peak_1933	242.274	0		3	1, 68, 92	3		0		2	67, 91	2
Chr5	1052537	1052538	hy5-1_peak_1934	122.26	0		0		0		0		0		0
Chr5	1063363	1063364	hy5-1_peak_1935	80.4781	0		0		0		0		0		0
Chr5	1079910	1079911	hy5-1_peak_1936	198.503	1	-22	1	9	2		1	-22	1	8	2
Chr5	1206490	1206491	hy5-1_peak_1937	51.9971	2	-179, -11	1	5	3		0		1	5	1
Chr5	1212799	1212800	hy5-1_peak_1938	14.3212	2	-199, -8	1	27	3		0		1	26	1
Chr5	1231376	1231377	hy5-1_peak_1939	37.3944	1	-59	2	10, 115	3		0		2	9, 114	2
Chr5	1243614	1243615	hy5-1_peak_1940	63.6872	0		1	11	1		0		1	11	1
Chr5	1259287	1259288	hy5-1_peak_1941	17.2402	1	-10	1	14	2		1	-10	1	13	2
Chr5	1375882	1375883	hy5-1_peak_1942	226.039	3	-156, -76, -23	1	41	4		2	-157, -24	1	41	3
Chr5	1462368	1462369	hy5-1_peak_1943	249.533	1	-167	4	67, 100, 121, 133	5		1	-167	2	100, 133	3
Chr5	1518128	1518129	hy5-1_peak_1944	81.3008	0		4	2, 27, 33, 158	4		0		4	26, 157, 2, 33	4
Chr5	1550145	1550146	hy5-1_peak_1945	23.0618	2	-127, -27	2	35, 49	4		2	-28, -127	2	34, 49	4
Chr5	1558515	1558516	hy5-1_peak_1946	184.186	3	-95, -74, -10	4	2, 19, 69, 186	7		3	-96, -11, -74	2	1, 18	5
Chr5	1565519	1565520	hy5-1_peak_1947	85.0895	2	-176, -9	1	108	3		0		1	108	1
Chr5	1568427	1568428	hy5-1_peak_1948	15.5336	0		3	7, 13, 161	3		0		1	12	1
Chr5	1578755	1578756	hy5-1_peak_1949	17.6971	0		3	6, 48, 160	3		0		3	159, 6, 48	3
Chr5	1615825	1615826	hy5-1_peak_1950	7.74168	0		2	13, 85	2		0		0		0
Chr5	1624421	1624422	hy5-1_peak_1951	16.0512	3	-185, -140, -19	1	7	4		2	-20, -140	1	6	3
Chr5	1653176	1653177	hy5-1_peak_1952	29.0729	0		1	2	1		0		1	1	1
Chr5	1672489	1672490	hy5-1_peak_1953	39.5999	0		1	12	1		0		0		0
Chr5	1758313	1758314	hy5-1_peak_1954	12.6351	0		2	46, 187	2		0		1	45	1
Chr5	1836520	1836521	hy5-1_peak_1955	50.9427	1	-32	2	27, 62	3		0		1	27	1
Chr5	1879876	1879877	hy5-1_peak_1956	339.169	2	-99, -26	1	5	3		2	-27, -99	1	4	3
Chr5	1886888	1886889	hy5-1_peak_1957	62.6111	0		1	62	1		0		0		0
Chr5	1893827	1893828	hy5-1_peak_1958	57.0912	2	-182, -28	1	68	3		1	-28	0		1
Chr5	1924186	1924187	hy5-1_peak_1959	11.3284	1	-4	0		1		1	-5	0		1
Chr5	1998318	1998319	hy5-1_peak_1960	95.6069	2	-90, -19	2	14, 94	4		1	-91	1	13	2
Chr5	2028110	2028111	hy5-1_peak_1961	17.8433	1	-10	2	34, 66	3		1	-11	1	34	2
Chr5	2068368	2068369	hy5-1_peak_1962	327.639	1	-17	2	14, 45	3		1	-17	2	44, 14	3
Chr5	2090509	2090510	hy5-1_peak_1963	14.3108	3	-44, -30, -19	1	44	4		2	-31, -19	1	43	3
Chr5	2112741	2112742	hy5-1_peak_1964	327.706	2	-43, -11	2	12, 193	4		1	-44	1	12	2
Chr5	2167235	2167236	hy5-1_peak_1965	302.733	1	-33	2	30, 145	3		1	-34	1	30	2
Chr5	2183856	2183857	hy5-1_peak_1966	108.803	3	-151, -117, -9	1	13	4		2	-10, -117	0		2
Chr5	2194018	2194019	hy5-1_peak_1967	7.80828	2	-155, -5	0		2		1	-6	0		1
Chr5	2202132	2202133	hy5-1_peak_1968	15.9526	1	-8	0		1		1	-9	0		1
Chr5	2222205	2222206	hy5-1_peak_1969	15.6927	0		0		0		0		0		0
Chr5	2237336	2237337	hy5-1_peak_1970	12.4648	2	-171, -32	1	7	3		1	-171	1	7	2
Chr5	2275916	2275917	hy5-1_peak_1971	2.77437	2	-178, -144	1	170	3		0		1	169	1
Chr5	2292398	2292399	hy5-1_peak_1972	98.713	1	-20	1	4	2		0		1	3	1
Chr5	2415486	2415487	hy5-1_peak_1973	33.8631	2	-110, -74	1	5	3		1	-75	1	5	2
Chr5	2455943	2455944	hy5-1_peak_1974	86.4176	3	-74, -52, -42	3	5, 46, 162	6		2	-75, -42	1	5	3
Chr5	2562151	2562152	hy5-1_peak_1975	149.738	0		1	2	1		0		1	1	1
Chr5	2612888	2612889	hy5-1_peak_1976	40.2303	1	-30	3	34, 97, 135	4		0		3	33, 96, 134	3
Chr5	2871254	2871255	hy5-1_peak_1977	76.6217	2	-46, -14	2	32, 67	4		0		1	32	1
Chr5	2938244	2938245	hy5-1_peak_1978	115.561	3	-196, -83, -65	2	2, 11	5		2	-84, -66	1	1	3
Chr5	2959097	2959098	hy5-1_peak_1979	6.88318	0		4	4, 27, 66, 76	4		0		2	65, 4	2
Chr5	2981821	2981822	hy5-1_peak_1980	24.992	2	-194, -185	2	9, 162	4		0		0		0
Chr5	2985520	2985521	hy5-1_peak_1981	16.007	1	-27	1	27	2		1	-27	1	26	2
Chr5	3004299	3004300	hy5-1_peak_1982	42.6108	2	-33, -14	1	126	3		2	-34, -15	0		2
Chr5	3023845	3023846	hy5-1_peak_1983	146.112	1	-74	1	61	2		0		0		0
Chr5	3032973	3032974	hy5-1_peak_1984	41.9916	3	-186, -124, -44	4	14, 68, 99, 191	7		2	-187, -125	3	13, 99, 191	5
Chr5	3060675	3060676	hy5-1_peak_1985	14.0797	0		1	3	1		0		0		0
Chr5	3100420	3100421	hy5-1_peak_1986	247.204	2	-49, -13	1	27	3		2	-50, -14	1	26	3
Chr5	3108793	3108794	hy5-1_peak_1987	9.58001	0		1	5	1		0		1	5	1
Chr5	3150466	3150467	hy5-1_peak_1988	64.3992	1	-13	3	24, 96, 125	4		1	-14	1	95	2
Chr5	3179862	3179863	hy5-1_peak_1989	16.0093	0		1	1	1		0		0		0
Chr5	3182731	3182732	hy5-1_peak_1990	15.5375	0		2	7, 55	2		0		1	7	1
Chr5	3199064	3199065	hy5-1_peak_1991	140.671	1	-26	2	1, 7	3		1	-27	1	6	2
Chr5	3253205	3253206	hy5-1_peak_1992	42.5647	0		1	141	1		0		0		0
Chr5	3262063	3262064	hy5-1_peak_1993	44.3772	0		2	8, 48	2		0		1	8	1
Chr5	3304821	3304822	hy5-1_peak_1994	48.9456	2	-42, -4	1	9	3		1	-5	1	8	2
Chr5	3316976	3316977	hy5-1_peak_1995	19.9487	1	-151	2	5, 77	3		1	-152	1	4	2
Chr5	3335248	3335249	hy5-1_peak_1996	8.16235	1	-32	1	1	2		0		1	1	1
Chr5	3384535	3384536	hy5-1_peak_1997	167.713	2	-45, -22	0		2		2	-46, -23	0		2
Chr5	3393130	3393131	hy5-1_peak_1998	301.051	3	-149, -43, -14	1	10	4		1	-15	1	9	2
Chr5	3473630	3473631	hy5-1_peak_1999	163.729	1	-58	1	25	2		0		0		0
[truncated: 521 more rows]

## Sheet: Table S4
Downregulated HY5-binding genes	hy5_average	WT_average	WT/hy5	p value		Upregulated HY5-binding genes	hy5_average	WT_average	WT/hy5	p value
AT2G23580	0.00162347	0.00435054	2.67978	0.0159784		AT2G18670	0.0151462	0.00549721	0.362945	0.00422251
AT5G47229	0.00167022	0.00436415	2.61291	0.0343318		AT1G80090	0.141093	0.0567912	0.402508	0.0267973
AT1G69490	0.0235513	0.156059	6.62634	0.000247305		AT3G28740	2.82502	1.00318	0.355107	0.000772494
AT4G34830	0.859391	1.90733	2.21939	0.0278441		AT5G16460	0.147253	0.019523	0.132581	0.0288991
AT1G49990	0.120484	0.251549	2.08782	0.000122973		AT2G40170	1.21638	0.139479	0.114668	0.0129944
AT1G22750	0.209768	0.44197	2.10695	0.0205273		AT5G38000	0.42045	0.0427764	0.10174	0.00502458
AT1G74140	0.00157101	0.0040615	2.58528	0.0391692		AT4G16260	0.75144	0.28648	0.381241	0.0162015
AT5G47600	0.062763	0.140633	2.2407	0.00259933		AT4G00430	0.730142	0.343137	0.46996	0.00623212
AT1G63870	0.00141267	0.00385283	2.72734	0.037677		AT1G27990	0.0528211	0.00498952	0.0944608	0.0183924
AT1G70949	0.00143559	0.00453515	3.15908	0.00819843		AT3G55880	0.0808616	0.0391901	0.484657	0.00572151
AT5G24580	0.370048	0.807944	2.18335	0.0163482		AT1G22600	0.252182	0.0311347	0.123461	0.000187851
AT5G23120	8.82535	17.7672	2.0132	5.17805e-05		AT3G12500	0.861685	0.204061	0.236817	0.00499386
AT1G17420	0.00242861	0.00619323	2.55011	0.0330784		AT5G06760	0.432149	0.0473898	0.109661	0.0291573
AT4G13840	0.0583431	0.265964	4.55863	0.00229685		AT1G62740	0.0377713	0.0170378	0.451079	0.00563207
AT2G46220	3.76865	7.57635	2.01036	0.0138087		AT1G56600	0.0404293	0.0131681	0.325707	0.0204551
AT5G17230	2.64808	7.03807	2.6578	5.06892e-05		AT2G01580	0.0445052	0.00835334	0.187693	0.00413812
AT1G68190	0.0646679	0.154326	2.38645	0.0149464		AT3G01570	4.26371	0.126652	0.0297047	0.00864799
AT4G25860	0.00295398	0.00774256	2.62106	0.00995068		AT1G69570	0.249531	0.116038	0.465023	0.0220269
AT5G27530	0.00150148	0.00399262	2.65912	0.0344745		AT4G36600	0.567798	0.0437017	0.0769671	0.0137102
AT5G10500	0.00183356	0.00374729	2.04372	0.0352101		AT1G54870	1.06921	0.139458	0.130431	0.0307582
AT5G43550	0.00142476	0.00380768	2.6725	0.0341758		AT1G60190	0.0905906	0.0334395	0.369128	0.0124951
AT3G61290	0.00147688	0.00397109	2.68884	0.0325609		AT5G63350	0.0869233	0.0135429	0.155803	0.000144819
AT5G35640	0.00143168	0.00372531	2.60205	0.0383441		AT5G11520	16.4609	7.53179	0.457555	0.00160073
AT1G52590	0.0274001	0.0770678	2.81269	0.00400819		AT1G24130	0.975974	0.419573	0.429902	0.000846995
AT5G37250	0.00179749	0.00365286	2.0322	0.0414119		AT1G48460	2.66182	1.1858	0.445486	0.0221714
AT5G49520	0.0269278	0.0564788	2.09741	0.00198852		AT1G15330	2.19624	0.418423	0.190518	0.00120259
AT5G50950	0.0359683	0.0982107	2.73048	0.00179045		AT2G02610	0.0402251	0.0184541	0.458771	0.00937189
AT5G63320	0.474893	1.18923	2.5042	0.00050973		AT3G51810	0.00932266	0.00445433	0.477796	0.0224784
AT3G61280	0.00158309	0.00389587	2.46094	0.0265816		AT4G27440	0.756836	0.367617	0.485729	0.00528146
AT1G79000	0.455298	0.972687	2.13637	0.000255728		AT3G18850	0.202631	0.087798	0.43329	0.00727664
AT3G15620	0.0374356	0.162435	4.33905	0.000408559		AT1G51860	0.515318	0.238502	0.462825	0.000804505
AT1G23074	0.00139726	0.00379053	2.71283	0.0321693		AT3G22800	0.0466099	0.022244	0.477238	0.0102767
AT1G72645	0.161036	0.50035	3.10707	0.00857215		AT1G77000	0.347906	0.172924	0.497042	0.011767
AT4G13060	0.0012683	0.00371496	2.92909	0.0321897		AT3G03280	0.131362	0.0445534	0.339166	0.0288623
AT1G46840	0.00150812	0.00381369	2.52878	0.0331758		AT5G18840	0.111152	0.0255173	0.229571	0.00592215
AT4G25580	0.906849	2.61284	2.88123	0.00343551		AT5G20740	7.07276	2.69459	0.380982	0.0181552
AT5G59050	0.00828244	0.0170392	2.05726	0.0357334		AT5G44670	0.0213496	0.0087923	0.411826	0.00450825
AT1G62340	0.00157163	0.00354896	2.25813	0.03017		AT3G45530	0.0100744	0.00380727	0.377917	0.0146535
AT5G10340	0.00123609	0.00355087	2.87266	0.022288		AT3G25830	0.910901	0.171614	0.1884	0.00510735
AT5G64940	0.775622	1.77624	2.29009	0.00389137		AT5G45650	6.85303	2.89208	0.422014	8.91081e-05
AT5G17750	0.0020103	0.0061968	3.08253	0.0221006		AT2G40340	0.0710601	0.0275687	0.387963	0.0013531
AT1G16510	0.440418	0.933545	2.11968	0.00668823		AT5G59220	0.346048	0.171065	0.494338	0.00526718
AT3G51760	0.00123405	0.00344065	2.7881	0.0324211		AT2G29950	0.0548482	0.0241304	0.439949	0.0410524
AT5G40340	0.0701199	0.173552	2.47508	0.0222283		AT5G66400	3.7704	0.32687	0.0866938	0.0129364
AT5G44110	0.211721	0.676574	3.19559	7.77683e-06		AT1G60050	0.147475	0.0547229	0.371067	0.042984
AT4G13420	0.018231	0.0745933	4.09156	0.0157803		AT1G80820	0.246259	0.103845	0.421691	0.000999526
AT3G03410	0.00181882	0.0038393	2.11088	0.0326569		AT4G15620	1.50114	0.738997	0.49229	0.0196485
AT3G48950	0.00124007	0.00343731	2.77186	0.0307218		AT5G67620	5.99532	1.93489	0.322733	0.013707
AT5G07190	0.0266124	0.200207	7.52305	0.0021022		AT2G23640	0.0219244	0.00601313	0.274267	0.0334844
AT3G57840	0.00167719	0.00410248	2.44604	0.00118841		AT1G04220	0.747522	0.334371	0.447306	0.000911075
AT5G22670	0.00132282	0.00368757	2.78766	0.025482		AT1G78990	0.0250312	0.00696831	0.278384	0.000132661
AT3G20200	0.0407172	0.118289	2.90514	0.00160652		AT5G02580	0.179404	0.0551366	0.307332	0.0279627
AT2G32315	0.00142714	0.00516779	3.62108	0.0101245		AT1G02700	0.0986396	0.00802113	0.0813175	0.00994243
AT4G13530	0.589262	1.39628	2.36954	0.00505891		AT1G27461	0.177793	0.00767417	0.0431635	0.00060829
AT5G54075	5.3502	16.3075	3.04802	0.00232438		AT3G05640	0.0614912	0.0253387	0.41207	4.96494e-06
AT2G37240	0.528326	1.20775	2.286	0.00625634		AT5G24820	0.0439005	0.0186889	0.42571	0.010805
AT4G26920	0.00131495	0.00448003	3.407	0.000776388		AT5G45690	0.047111	0.00908227	0.192785	0.036109
AT2G04032	0.00129928	0.00361791	2.78456	0.0269073		AT2G43890	0.0959209	0.00641306	0.0668578	0.00383977
AT3G18610	0.127567	0.26387	2.06848	0.00827954		AT5G04010	0.0101411	0.00406067	0.400418	0.0290603
AT2G28725	0.00133711	0.00331865	2.48196	0.0352613		AT3G02550	0.109658	0.0320633	0.292393	0.0032463
AT3G57620	0.0012511	0.00345045	2.75793	0.0307901		AT5G03160	27.8852	13.2969	0.476845	0.00139131
AT4G20070	1.55644	3.26798	2.09965	2.32508e-05		AT4G29980	0.0905764	0.0312649	0.345177	0.0135503
AT1G14150	1.20317	2.68925	2.23515	0.00191748		AT1G72200	2.25743	0.851949	0.377398	0.0218636
AT2G39800	0.00121783	0.00336389	2.76221	0.0304795		AT5G67430	0.582357	0.208747	0.358451	0.023076
AT3G56270	0.117544	0.235504	2.00354	0.000348139		AT3G60780	0.0209108	0.00820497	0.392379	0.00697374
AT3G52525	0.0333141	0.0667188	2.00272	0.00782229		AT2G47780	38.3031	2.73012	0.0712767	0.00019651
AT1G53780	0.0237528	0.0937081	3.94513	4.73753e-06		AT1G77640	0.230113	0.0990581	0.430476	0.0169928
AT5G02270	2.99663	9.70895	3.23996	0.00104018		AT3G01513	0.0762874	0.0343665	0.450488	0.00368969
AT2G40925	0.00124998	0.00349755	2.79809	0.0256304		AT1G02360	8.00836	2.53774	0.316886	0.0158271
AT4G14620	0.07341	0.151305	2.0611	0.0121432		AT2G18370	0.0659477	0.0243645	0.369453	0.00285475
AT2G18700	1.4777	3.93694	2.66424	0.00394046		AT3G53650	2.15343	0.993213	0.461224	0.0253363
AT2G47750	0.291486	0.742769	2.54821	0.00203331		AT1G14540	0.157305	0.0582607	0.370368	0.0100533
AT5G65166	0.00130942	0.0031952	2.44016	0.0344633		AT1G21140	0.118569	0.0425798	0.359114	0.0141814
AT5G18670	16.9004	45.2234	2.67588	0.000116915		AT1G08830	26.1664	6.64582	0.253983	0.0471553
AT5G53220	0.0119846	0.0411489	3.43349	0.0236587		AT4G16160	0.759096	0.0251096	0.0330783	0.00360602
AT1G31800	1.37123	3.42259	2.49601	0.00755155		AT5G05220	0.0154107	0.00326665	0.211973	0.00344387
AT3G24190	0.739051	1.82209	2.46545	4.35046e-05		AT4G33560	0.414429	0.127369	0.307336	0.000727895
AT3G21560	3.28879	7.80592	2.37349	0.00223461		AT4G12520	0.200844	0.0783776	0.390241	0.00666193
AT5G10150	0.395831	1.01714	2.56962	0.000415717		AT1G07080	0.478759	0.197722	0.412988	0.00240604
AT2G43400	0.949386	2.21116	2.32904	0.0119801		AT3G02480	3.62377	0.431538	0.119085	0.0278627
AT3G29720	0.0246937	0.0765022	3.09804	0.0296926		AT1G22770	0.723025	0.298473	0.412812	0.00114475
AT4G35170	0.00124017	0.00306335	2.47009	0.0270293		AT3G26170	0.0656943	0.0267445	0.407105	0.00343516
AT2G42750	1.3904	4.36484	3.13926	0.0129382		AT1G46554	0.313287	0.138362	0.441646	0.00533091
AT5G22190	0.00116197	0.00298304	2.56722	0.034108		AT5G06250	0.0149589	0.00625012	0.417821	0.0105869
AT4G01800	3.07185	6.66014	2.16812	0.00156393		AT5G06090	0.0707145	0.0348604	0.492974	0.00477027
AT2G24625	0.00141128	0.0030649	2.17171	0.0265641		AT1G16850	0.0858889	0.0384179	0.447298	0.0223565
AT5G63160	4.80585	11.9087	2.47797	0.000365936		AT2G40610	0.0544257	0.0225996	0.415238	0.00117874
AT5G63085	0.00104419	0.00291322	2.78993	0.0304579		AT2G30360	0.0129367	0.00582092	0.449955	0.0465773
AT5G23930	0.00106195	0.00296406	2.79116	0.0344143		AT5G44120	3.12661	0.328632	0.105108	0.0492747
AT4G28280	0.00163611	0.0036878	2.25401	0.0268662		AT3G21720	0.231305	0.0713226	0.308349	0.000724104
AT1G54095	0.00112066	0.00311836	2.7826	0.0222055		AT2G28990	0.0291611	0.00831555	0.285159	0.00722159
AT1G32880	0.00106593	0.00287784	2.69984	0.0298499		AT5G50360	0.36275	0.0424937	0.117143	0.00796847
AT1G73870	0.177013	0.822945	4.64906	0.000282622		AT5G05280	0.0144004	0.00300713	0.208824	8.43596e-05
AT1G24520	0.00105349	0.00290232	2.75496	0.030896		AT1G20500	0.0190164	0.00566184	0.297735	0.0106254
AT2G45380	0.194118	0.574093	2.95744	0.00193038		AT2G01610	0.0756003	0.0185396	0.245232	0.000560518
AT2G15960	0.501908	1.24199	2.47453	0.00783936		AT4G18920	0.0225626	0.0082802	0.366989	0.0257948
AT5G65370	0.00125316	0.0029869	2.3835	0.0294625		AT4G27435	0.229909	0.100155	0.435627	0.0235898
AT4G09070	0.00136852	0.00288095	2.10516	0.0471726		AT1G13130	0.0371403	0.00735068	0.197916	0.00945525
AT1G57830	0.001179	0.00282652	2.39739	0.0225803		AT2G28110	0.296682	0.143346	0.483164	3.87621e-05
AT1G77815	0.00128685	0.00290552	2.25785	0.0240308		AT2G17840	0.0626864	0.0267786	0.427184	0.00910122
AT3G51240	0.718595	1.512	2.10411	0.00140864		AT4G13860	0.176542	0.0542468	0.307275	0.0338472
AT2G47560	0.101217	0.208308	2.05803	0.00385116		AT5G07080	3.8055	1.64131	0.431299	0.00249913
AT3G20555	0.00143666	0.00313363	2.1812	0.0362608		AT1G07070	1.14884	0.537858	0.468176	0.00621518
AT4G35560	0.00133117	0.00287889	2.16268	0.0303948		AT3G50120	0.0428121	0.0151651	0.354225	8.86847e-05
AT2G07739	0.667251	2.32289	3.48128	0.0027456		AT3G25717	0.216115	0.0797297	0.368922	0.0477061
AT2G33190	0.00115592	0.00280867	2.42982	0.0236695		AT2G01520	1.70337	0.120102	0.0705088	0.00833172
AT5G24850	1.00035	3.89733	3.89595	0.00116066		AT1G05420	0.219377	0.0714372	0.325637	0.00549803
AT1G55810	0.343408	0.766862	2.23309	0.00241507		AT1G52690	2.5534	0.253345	0.0992187	0.0212904
AT5G07990	0.00851424	0.0255038	2.99542	0.0187739		AT2G38905	0.0657835	0.00799753	0.121574	0.0102753
AT2G24780	0.00100899	0.00281615	2.79106	0.03597		AT3G45310	6.24338	2.6645	0.426772	0.000479742
AT3G61220	0.956466	3.56209	3.72422	0.000872136		AT2G30040	0.0128903	0.00339128	0.263087	0.00396341
AT1G75100	0.985574	2.42041	2.45584	0.00402699		AT1G19840	0.167286	0.0667096	0.398775	0.0487687
AT5G58570	0.0108187	0.0331313	3.0624	0.0313497		AT5G44360	0.0250196	0.0111452	0.445461	0.0100776
AT4G28490	0.138269	0.279526	2.02162	0.00334571		AT5G43770	0.0159593	0.00375186	0.23509	0.0203121
AT4G33666	1.0941	3.72356	3.4033	0.0050006		AT5G58860	1.14274	0.256083	0.224096	0.00891316
AT2G25625	0.109346	0.276339	2.52719	0.00748153		AT2G21045	1.06603	0.452018	0.424021	0.0373638
AT1G63860	0.0145313	0.0326377	2.24603	0.0284833		AT4G36010	0.433584	0.137395	0.316883	0.00550459
AT5G55570	0.0146306	0.0532986	3.64294	6.24141e-05		AT3G24650	0.419878	0.148352	0.353322	0.0129417
AT2G44810	0.00108581	0.0028098	2.58774	0.0385266		AT3G20160	0.313084	0.134528	0.429686	0.00929494
AT3G61630	0.698246	1.64836	2.36072	0.00108002		AT1G78000	2.67624	1.19613	0.446945	0.0001603
AT3G27690	16.7071	38.2846	2.29152	0.00138244		AT3G56330	0.595349	0.196332	0.329776	0.00859493
AT2G18360	0.0189722	0.0562556	2.96515	0.0020905		AT1G76790	0.630388	0.141317	0.224174	0.00502842
AT2G22180	0.00423423	0.0105741	2.49728	0.0116743		AT4G36700	0.625267	0.0349167	0.0558429	0.00266402
AT2G22795	0.141478	0.522032	3.68985	0.00350425		AT1G70720	0.0176215	0.00541171	0.307109	0.00557032
AT5G11260	0.0193143	1.13785	58.9125	0.00105022		AT3G15670	6.07534	0.303307	0.0499244	0.00576704
AT1G72760	0.000979668	0.00265632	2.71145	0.0337299		AT1G53700	0.462315	0.177212	0.383313	0.00180869
AT1G03090	1.77201	4.02125	2.26932	0.00705921		AT3G22850	1.55874	0.7595	0.487253	0.000198121
AT1G78510	2.86266	5.89141	2.05802	4.60475e-05		AT5G52300	0.626717	0.101076	0.161279	0.0182606
AT5G09940	0.00113641	0.00298476	2.62648	0.0411289		AT3G44310	33.7655	16.2573	0.481478	0.00379753
AT2G01850	3.51737	7.29236	2.07324	0.0483973		AT2G43590	1.54993	0.466129	0.300742	0.0445343
AT2G23120	0.459105	0.996782	2.17114	0.0044095		AT5G52220	0.190116	0.0816766	0.429614	0.0174405
AT5G09930	0.00632902	0.0228974	3.61783	0.0138211		AT1G72120	0.23044	0.104182	0.452103	0.00221838
AT1G04500	0.000988477	0.00262837	2.65901	0.0317464		AT2G47770	4.75823	1.01575	0.213471	0.020149
AT1G78280	0.00288145	0.00599602	2.0809	0.0315984		AT3G50980	0.530633	0.0740196	0.139493	0.0179147
AT4G16155	2.00759	4.1551	2.0697	0.00270295		AT5G05290	22.6978	1.25664	0.0553641	0.00243442
AT1G14430	0.00107548	0.00279034	2.59452	0.0414083		AT4G30850	1.40236	0.653097	0.465714	0.000169897
AT4G13400	0.0428785	0.0918898	2.14303	0.00278626		AT5G45700	1.1811	0.568319	0.481179	0.00949916
AT5G39660	0.613059	1.57207	2.5643	0.00143085		AT5G55180	4.62137	2.27874	0.493089	0.00109159
AT1G22403	0.0205194	0.0463196	2.25735	0.00979592		AT1G80340	0.38223	0.147143	0.384959	0.000102994
AT3G63233	0.00101239	0.00289972	2.86423	0.0373765		AT2G23170	8.60744	3.06344	0.355905	0.000792854
AT5G22180	0.00101332	0.00269008	2.65473	0.0278042		AT3G11050	0.885904	0.301766	0.340631	8.65209e-05
AT1G25440	1.65369	4.94407	2.98972	0.00564601		AT3G07970	0.0362097	0.0125473	0.346516	0.0239239
AT4G35783	0.0346665	0.0875948	2.52678	0.0118015		AT2G42560	0.190093	0.0414141	0.217862	0.0112583
AT1G30640	0.0780894	0.173683	2.22415	0.0163601		AT4G12510	11.9435	4.57157	0.382766	0.0040287
AT1G74180	0.0483996	0.11965	2.47212	0.00018584		AT2G47150	0.063539	0.0311583	0.490381	0.0117012
AT5G40620	0.00471202	0.0118135	2.50709	0.0303134		AT2G33070	6.64306	2.93708	0.442127	0.000395765
AT2G34430	0.291898	0.881581	3.02016	0.0223143		AT4G33467	0.0742071	0.00929586	0.125269	0.0385159
AT1G24070	0.00899456	0.0193334	2.14945	0.0210126		AT2G28860	0.0713221	0.00288141	0.0403999	0.000185836
AT3G54830	0.631855	1.28553	2.03454	0.000616162		AT1G71030	1.77693	0.808522	0.455011	4.55693e-05
AT5G49730	0.322932	0.958541	2.96824	0.000130633		AT5G56870	2.09445	1.04713	0.499953	0.0021907
AT1G07680	0.00242177	0.00709678	2.93041	0.0381262		AT5G23950	0.0871624	0.0273498	0.31378	0.00125884
AT1G50610	0.000999535	0.00263048	2.6317	0.0296861		AT3G58060	0.043313	0.00489603	0.113038	7.79557e-05
AT5G40350	0.00102129	0.00272459	2.6678	0.043459		AT2G36640	3.62824	0.181303	0.04997	0.0101597
AT3G55240	0.0147837	0.0632941	4.28135	0.0156889		AT2G23240	0.0835508	0.00541044	0.0647562	0.0437135
AT1G07390	0.0383596	0.106916	2.78722	0.00402619		AT2G23400	0.544335	0.247499	0.454681	0.00133024
AT1G72770	0.230941	0.592233	2.56444	0.000671295		AT1G03220	4.62055	2.08501	0.451246	0.0295861
AT1G59950	0.0025104	0.00693295	2.76169	0.00713532		AT4G21020	0.490439	0.0381621	0.077812	0.0161869
AT3G32905	0.000982764	0.00264581	2.69221	0.0302383		AT5G09520	0.267478	0.0666001	0.248992	0.00567575
AT2G14510	0.00120136	0.00488109	4.06297	0.0300847		AT5G66170	9.59759	1.53145	0.159566	0.0205464
AT5G24810	0.906322	2.01862	2.22727	0.000645205		AT4G26890	0.0393867	0.0170412	0.432664	0.00283603
AT3G19850	0.065332	0.248446	3.80283	0.00276083		AT4G37409	0.0246046	0.00983678	0.399794	0.0124274
AT3G52500	0.00098237	0.00255454	2.60038	0.0316587		AT3G17520	8.73975	0.461639	0.0528206	0.0028127
AT1G77780	0.00102352	0.00256556	2.5066	0.0372246		AT2G37870	1.34615	0.0712775	0.0529492	0.0267021
AT3G48390	0.593566	1.42481	2.40043	0.00780461		AT3G49070	0.0703283	0.0319579	0.454411	0.00106998
AT5G63740	0.000992112	0.00257635	2.59683	0.0330457		AT4G33550	0.55159	0.163856	0.297061	0.0290909
AT1G69500	0.000997163	0.00258133	2.58867	0.0292927		AT5G64080	1.54065	0.723298	0.469477	0.00377584
AT1G77760	61.852	124.44	2.0119	0.00243879		AT1G76980	0.0158179	0.00463815	0.293222	0.000766267
AT3G30460	0.0726629	0.314481	4.32794	0.0104776		AT1G20010	0.0599501	0.0250353	0.417603	0.000235775
AT1G20350	0.0180176	0.0703064	3.90209	0.0300023		AT4G33980	0.170242	0.0772882	0.45399	0.042752
AT1G21620	0.000997434	0.00258231	2.58895	0.0328307		AT5G42900	0.0969691	0.0447003	0.460974	0.00547926
AT2G20250	0.00588119	0.0129368	2.19969	0.0419751		AT1G70880	1.45305	0.318071	0.2189	0.00805788
AT3G23530	1.88204	4.08422	2.1701	0.00170537		AT5G24470	0.952756	0.403336	0.423336	0.00874569
AT2G24350	0.00728375	0.0166816	2.29025	0.0431018		AT1G23070	0.0413597	0.0065596	0.158599	0.000221045
AT5G30500	0.00116593	0.00264237	2.26633	0.0394826		AT1G22110	0.178878	0.0609507	0.340738	0.00654245
AT5G58660	0.180131	0.41858	2.32376	0.00112147		AT1G57750	0.0346963	0.00528863	0.152426	0.00013092
AT2G36200	0.00101728	0.00262526	2.58066	0.0260164		AT1G30700	1.415	0.569074	0.402173	0.00375796
AT4G23260	0.0339077	0.12053	3.55465	0.00573851		AT5G24130	0.106308	0.00692381	0.0651297	1.26321e-05
AT3G62610	0.00316628	0.0147887	4.67069	0.0206793		AT1G06360	1.6818	0.774524	0.460532	4.17125e-05
AT4G16990	0.261443	0.796754	3.04753	0.000168942		AT3G18830	0.920897	0.4273	0.464004	0.021208
AT1G30740	0.00131836	0.010412	7.8977	0.0055679		AT4G15390	0.597147	0.21851	0.365922	0.0283119
AT5G50140	0.00111357	0.00258058	2.31739	0.0356282		AT1G55240	0.166424	0.0260065	0.156267	4.22836e-05
AT2G21970	4.95471	10.0821	2.03486	0.00524666		AT2G18540	0.225328	0.0513198	0.227756	0.00363085
AT3G44230	0.00116288	0.00465427	4.00236	0.0396845		AT5G65165	0.119601	0.00679402	0.0568058	0.00106295
AT3G13065	0.0230772	0.0634332	2.74874	3.98716e-05		AT2G42790	4.61094	1.74717	0.378919	0.00362135
AT5G61190	0.0911392	0.186321	2.04436	0.00365034		AT1G20030	1.99742	0.929727	0.465464	0.00256649
AT1G03080	0.449875	0.915257	2.03447	0.00716013		AT5G62490	1.03274	0.115956	0.11228	0.0123469
AT5G54990	0.0014686	0.00356805	2.42955	0.0344598		AT1G15380	1.16564	0.445236	0.381966	0.00182647
AT5G18407	0.0232942	0.0569562	2.44508	0.00156691		AT5G04330	1.65187	0.661013	0.40016	0.00694951
AT5G03940	1.62061	3.55314	2.19246	0.0162219		AT2G38860	0.772236	0.342252	0.443196	0.000122738
AT1G30170	0.0225407	0.101371	4.49723	0.00884078		AT1G18320	0.429048	0.196404	0.457767	0.00356218
AT3G17370	0.00105352	0.00267585	2.53991	0.0201647		AT1G01390	1.00137	0.447363	0.446752	0.00338284
AT1G73990	0.496808	2.18288	4.39382	0.00145945		AT5G27520	0.785116	0.387403	0.493434	0.000105217
AT5G59120	0.00109128	0.00284219	2.60445	0.04432		AT2G43580	0.0510541	0.0141139	0.27645	0.0428998
AT1G53670	2.8599	6.13568	2.14542	0.00311573		AT1G69830	0.542387	0.265792	0.490042	0.0035142
AT3G61910	0.00131631	0.00297175	2.25764	0.00165838		AT5G01670	0.627709	0.279819	0.445777	0.0283848
AT2G24340	0.00102261	0.00261254	2.55478	0.0289079		AT4G29450	0.0259181	0.00885043	0.341476	0.010038
AT1G54260	0.0259985	0.0557822	2.14559	0.0103621		AT1G69030	2.22264	0.746597	0.335905	0.0015174
AT4G33820	0.0010485	0.00269837	2.57355	0.0340495		AT1G02205	7.65166	2.76	0.360707	2.84948e-05
AT2G23390	0.385641	0.77913	2.02035	0.00733133		AT3G56350	0.277026	0.0746753	0.269561	0.0353283
AT5G24220	0.00106133	0.00273881	2.58054	0.0361421		AT3G51360	0.0291865	0.00972048	0.333047	0.00616567
AT5G48420	0.00138497	0.00370584	2.67575	0.0279148		AT4G39940	1.65477	0.505106	0.305242	0.00982465
AT2G19893	0.00104689	0.00262249	2.50503	0.024689		AT3G58450	0.265131	0.0249851	0.0942368	0.021599
AT2G37290	0.011221	0.0224936	2.0046	0.0145967		AT2G16760	0.225943	0.0960935	0.4253	0.00444323
AT4G34940	0.00178166	0.00642114	3.60401	0.0467813		AT1G68050	1.14581	0.534414	0.466408	0.0118654
AT5G52250	1.81606	5.26092	2.89689	0.00124138		AT1G20070	0.259979	0.0854505	0.328683	0.000181191
AT1G02530	0.0010605	0.0027011	2.547	0.0194016		AT2G18340	0.0481964	0.0118822	0.246537	0.0216875
AT5G24120	0.29272	0.609362	2.08172	4.37243e-05		AT1G27670	1.44448	0.647876	0.448517	0.00810567
AT3G08790	0.00113226	0.00290277	2.56369	0.0430423		AT2G44940	1.71241	0.757908	0.442599	0.0358726
AT3G62150	0.890189	2.6374	2.96274	0.000217169		AT3G48510	0.0786059	0.0158014	0.20102	0.00398211
AT5G27690	0.0488869	0.170522	3.48809	0.00226664		AT2G39460	16.0474	7.55438	0.470754	0.00316921
AT2G42340	0.00114993	0.00346015	3.00902	0.0171366		AT2G15390	0.117723	0.0556389	0.472625	0.00108621
AT1G65060	0.0048663	0.0111012	2.28125	0.0155529		AT2G46790	0.0338607	0.011461	0.338476	0.000471879
AT2G28920	0.00115404	0.00301981	2.61672	0.0464675		AT1G18140	0.466505	0.144778	0.310347	1.01252e-05
AT1G08440	0.00110056	0.00284901	2.58871	0.0364872		AT2G21490	0.622131	0.0323577	0.0520111	0.00425905
AT4G00380	0.0770179	0.158713	2.06073	0.00257332		AT1G54860	0.172574	0.0247166	0.143223	0.0246616
AT5G62660	0.00109876	0.00284152	2.58611	0.0356478		AT4G26050	0.0212845	0.00489362	0.229915	0.0138696
AT3G42960	0.00117172	0.00315087	2.68909	0.0398766		AT5G15500	0.0079226	0.0032401	0.408969	0.00519233
AT3G60510	0.0997684	0.227315	2.27843	0.00117351		AT1G27420	0.642398	0.23087	0.359388	0.0326648
AT3G46340	0.00110646	0.00364862	3.29756	0.0281008		AT5G54610	0.00657355	0.00296636	0.451257	0.0397352
AT5G52901	0.00120916	0.00275295	2.27674	0.0334536		AT4G22230	1.44401	0.526602	0.364681	0.0111531
AT1G02550	0.00116832	0.00308051	2.6367	0.0413544		AT1G11600	9.35945	1.71815	0.183573	2.26009e-05
AT5G47590	0.0527836	0.134744	2.55277	0.00153217		AT1G76240	1.37796	0.606001	0.439781	0.00504951
AT1G13650	0.0589594	0.186263	3.15918	0.000922243		AT5G51490	0.791363	0.378139	0.477832	0.0071345
AT4G27650	0.13034	0.302621	2.32178	0.00254102		AT5G19140	0.443035	0.186973	0.422028	0.00045276
AT1G11720	0.783886	2.14356	2.73453	0.000449396		AT1G67810	4.81072	1.41687	0.294524	0.000124563
AT2G47460	0.011744	0.368214	31.3534	0.00221045		AT3G19920	0.802955	0.0900514	0.11215	0.00330114
AT5G47040	9.32527	18.7715	2.01297	0.00805336		AT4G17800	3.89919	1.91249	0.490485	0.00432655
AT1G43730	0.00180019	0.00503921	2.79926	0.0258612		AT2G43390	0.0151241	0.00360762	0.238535	0.0228801
AT5G53370	2.24826	4.55263	2.02496	0.0211131		AT1G48470	0.121686	0.0288098	0.236756	0.00125295
AT3G09600	0.225577	0.516347	2.289	0.0204165		AT3G53040	1.06767	0.156951	0.147003	0.0333547
AT1G70870	0.00134553	0.00321265	2.38765	0.0242735		AT4G36820	0.121468	0.059477	0.489652	0.00289817
AT5G64840	2.45967	5.18039	2.10613	0.00242308		AT1G32560	1.61213	0.152263	0.0944479	0.0203868
AT5G66810	0.49355	1.37967	2.79539	0.000309448		AT5G48430	0.467002	0.163823	0.350797	0.0290589
AT5G63730	0.00114328	0.00302075	2.64219	0.0307251		AT4G22680	0.0175037	0.00338911	0.193622	0.0268733
AT2G25530	0.150826	0.649907	4.30898	0.00268359
AT5G15910	0.650275	1.62345	2.49656	0.0081016

## Sheet: Table S5
Blue-inducible HY5-binding genes	Dark_FPKM_average	Blue_FPKM_average	Blue/Dark	p-value		Blue-repressed HY5-binding genes	Dark_FPKM_average	Blue_FPKM_average	Blue/Dark	p-value
AT1G01520	0.919837	51.9349	56.461	0.000699967		AT1G01240	13.2032	5.96539	0.451813	0.0344716
AT1G02390	0.63725	1.33161	2.08962	0.0353703		AT1G02640	37.6005	12.1039	0.321908	0.0021626
AT1G05100	0.446242	2.09641	4.69793	0.00381122		AT1G02650	2.92003	0.817809	0.280068	0.0388413
AT1G07150	6.61456	108.526	16.4071	0.00138813		AT1G02660	19.928	5.80801	0.29145	0.00667747
AT1G09350	9.67485	80.6413	8.33515	4.01788e-05		AT1G04310	10.1192	3.79824	0.375351	0.00187007
AT1G11700	8.84431	29.1964	3.30115	0.000151991		AT1G04360	2.30022	0.968631	0.421103	0.0239534
AT1G13740	8.03242	46.6172	5.80364	0.00742506		AT1G10550	21.2688	10.3205	0.48524	0.00761803
AT1G13930	60.8166	765.319	12.584	0.00669022		AT1G13250	21.3449	6.40702	0.300166	0.00128171
AT1G14430	4.07956	14.9568	3.66627	0.00136902		AT1G14920	17.7868	5.55132	0.312104	0.00179358
AT1G16510	0.967832	2.32853	2.40593	0.0209857		AT1G15010	5.79455	2.43873	0.420866	0.00965054
AT1G19490	3.67956	13.8665	3.76854	0.0113169		AT1G15670	67.0891	28.881	0.430487	0.000793357
AT1G19670	9.13754	40.2614	4.40615	0.000522068		AT1G17990	11.8894	4.87721	0.410213	0.0168158
AT1G20070	14.5699	38.6361	2.65177	0.00951054		AT1G19840	4.86005	1.79426	0.369185	0.0180659
AT1G22770	7.88385	42.0333	5.33157	0.00799065		AT1G22110	2.43557	0.812061	0.333417	0.0339446
AT1G23010	0.61471	2.27529	3.7014	0.0263916		AT1G23390	45.6768	22.2489	0.487093	0.0294981
AT1G26761	0.345051	1.70657	4.94586	0.0018004		AT1G26270	28.4251	10.1833	0.358249	0.00613786
AT1G27730	4.82496	10.0411	2.08107	0.0120823		AT1G34110	16.0774	6.9291	0.430983	0.00012152
AT1G30320	7.05839	15.967	2.26213	0.0156192		AT1G49650	8.3699	4.01432	0.479614	0.0260479
AT1G44446	12.9462	43.4956	3.35971	0.00179877		AT1G52565	11.8477	4.8783	0.41175	0.00970063
AT1G44542	0.545756	1.59451	2.92165	0.0323631		AT1G56210	23.5224	11.1764	0.475141	0.0115128
AT1G47980	0.233416	1.03239	4.42296	0.00796179		AT1G61260	19.8671	9.92025	0.499331	0.0401756
AT1G48000	0.493166	1.64798	3.34163	0.0258715		AT1G64660	291.287	126.213	0.433294	0.0115967
AT1G48100	0.608361	12.0261	19.7681	0.000248979		AT1G68190	12.2076	3.34744	0.274208	0.0016522
AT1G49660	46.7583	204.342	4.37017	0.00731662		AT1G72820	30.6475	14.3098	0.466913	0.000329157
AT1G53163	0.697198	2.16708	3.10828	0.0119649		AT1G77210	6.68742	1.88884	0.282447	0.0141354
AT1G53670	32.9453	83.5642	2.53645	0.000367207		AT1G77870	41.8222	19.845	0.474509	0.0456419
AT1G53680	4.41992	14.0142	3.17069	0.00105705		AT1G78270	7.32404	2.70756	0.369681	0.00597195
AT1G54095	0.861296	2.09914	2.43718	0.0166923		AT1G80440	42.0071	14.6169	0.347963	0.00362958
AT1G58520	2.48245	6.34099	2.55432	0.00556011		AT2G01610	8.51766	2.11753	0.248605	0.0240482
AT1G60190	2.5817	7.13279	2.76283	0.0176298		AT2G23170	15.7428	7.5061	0.476797	0.00201137
AT1G61340	1.81092	5.18113	2.86106	0.0083633		AT2G25900	48.9164	17.9598	0.367153	0.0132864
AT1G61890	32.9266	220.291	6.69036	0.00152619		AT2G37670	3.69035	1.36759	0.370584	0.0217658
AT1G62180	5.04848	18.8981	3.74332	0.0317798		AT2G43018	15.7153	3.03269	0.192977	0.00347684
AT1G64780	0.659765	3.63763	5.51352	0.0214078		AT2G44500	55.7934	26.156	0.468801	9.31855e-05
AT1G65060	1.00382	3.30679	3.2942	0.00785702		AT2G45050	35.9021	6.18016	0.172139	0.00485677
AT1G67030	6.85678	50.7303	7.39855	0.000650612		AT2G46990	55.0377	14.2203	0.258374	0.00691582
AT1G69640	47.9673	102.101	2.12854	2.3341e-05		AT3G02040	17.0451	7.82194	0.458896	0.00108112
AT1G70420	12.2137	38.4179	3.14547	0.00137283		AT3G02550	26.9402	7.52647	0.279377	0.0113367
AT1G72030	2.72309	7.54545	2.77091	0.0438046		AT3G06750	81.4115	27.9919	0.343832	0.0188535
AT1G75100	3.97651	14.278	3.5906	0.000514899		AT3G09780	6.88727	3.37554	0.490113	0.0147466
AT1G77280	4.98304	10.9933	2.20614	0.00791031		AT3G10985	512.116	234.785	0.45846	0.000192751
AT1G78510	7.45252	42.2926	5.67494	1.70699e-06		AT3G11745	3.30502	1.07043	0.32388	0.0416605
AT1G78995	3.05814	9.48958	3.10306	0.00082547		AT3G12920	38.8538	15.4983	0.398888	0.000813069
AT1G80340	0.279977	5.7065	20.382	0.000953726		AT3G14150	12.2452	0.904731	0.0738847	0.000774248
AT2G04680	1.52063	6.14766	4.04284	0.00421549		AT3G15500	8.38866	3.89934	0.464835	0.0106707
AT2G15970	111.615	877.538	7.86219	0.00382283		AT3G15530	31.3115	14.6813	0.46888	0.0129379
AT2G21560	4.85568	21.0062	4.32611	0.00400085		AT3G15630	129.746	49.9366	0.384879	0.00381784
AT2G21970	27.5561	130.32	4.72927	0.00281617		AT3G16490	4.64725	0.994671	0.214034	0.00452586
AT2G22240	7.05456	23.6846	3.35735	0.0229173		AT3G21460	2.55438	0.602326	0.235801	0.0167792
AT2G23120	128.553	307.3	2.39046	0.00425428		AT3G25717	219.557	80.7123	0.367614	0.0278454
AT2G25530	0.650836	6.78826	10.4301	0.00439772		AT3G25730	22.4557	4.19856	0.186971	0.000583064
AT2G28780	4.59903	9.25287	2.01192	0.0194891		AT3G48390	4.56765	2.16523	0.474035	0.00772307
AT2G30040	5.87984	62.3239	10.5996	0.000691894		AT3G50130	3.22285	1.04528	0.324333	0.00509516
AT2G32510	1.5887	8.92438	5.61743	0.0318021		AT3G55840	8.17147	2.60595	0.318909	0.0139169
AT2G34420	82.4687	323.944	3.92808	5.21215e-05		AT3G58060	1.78635	0.72694	0.406942	0.0200168
AT2G34430	10.6013	41.4702	3.91182	1.55843e-05		AT3G58620	20.3899	7.47863	0.366782	0.000462395
AT2G36470	2.07397	4.68503	2.25897	0.00373711		AT3G61830	23.1003	5.45134	0.235985	0.017112
AT2G36800	3.94015	19.4838	4.94493	1.88656e-05		AT3G63350	11.8633	3.79681	0.320045	0.04363
AT2G39250	3.90463	78.6305	20.1377	0.00111015		AT4G08950	187.774	28.7771	0.153254	0.000144589
AT2G39800	5.72197	18.3761	3.21149	0.00323051		AT4G16500	257.265	127.978	0.497455	0.0319694
AT2G40100	7.31137	19.2759	2.63643	0.000246842		AT4G25580	10.5215	3.46804	0.329615	0.0129181
AT2G40340	0.426674	1.03949	2.43627	0.00141962		AT4G27440	703.857	345.714	0.491171	0.047647
AT2G41660	4.11756	11.7106	2.84406	0.0194859		AT4G36010	34.6271	3.72078	0.107453	0.000101872
AT2G41870	4.67848	14.5144	3.10238	0.00651393		AT4G36040	99.4992	42.7321	0.429471	0.00252617
AT2G42350	4.69068	9.69305	2.06645	0.0150024		AT4G36850	42.1027	20.5815	0.48884	0.0143523
AT2G43020	0.00253708	9.22643	3636.63	0.018139		AT4G37890	19.5371	9.26991	0.474478	0.00386386
AT2G44940	8.79478	24.9408	2.83587	0.000974884		AT4G38825	109.034	14.2606	0.13079	0.0114793
AT2G46270	44.2329	115.599	2.61342	0.00271824		AT5G01210	126.381	51.328	0.406137	0.00041302
AT2G46410	2.63656	8.21216	3.11472	0.00841995		AT5G02550	59.3852	22.5832	0.380283	0.0291308
AT2G46420	8.01387	59.0317	7.3662	6.13862e-06		AT5G02580	85.0357	13.3023	0.156432	0.00769486
AT2G46790	0.432677	14.5847	33.7081	0.0495064		AT5G11060	2.47262	1.231	0.49785	0.00428609
AT2G47770	2.37842	7.56737	3.18169	0.00625976		AT5G17010	4.70563	0.647373	0.137574	0.0100803
AT3G02140	12.7394	55.7091	4.37297	0.00598884		AT5G19120	88.4215	25.4476	0.287798	0.00167072
AT3G07360	11.3087	33.1374	2.93026	0.000965854		AT5G20250	280.974	122.568	0.436223	0.0131138
AT3G12320	14.4959	72.0167	4.96807	2.1353e-05		AT5G25620	2.18386	0.385879	0.176696	0.0427613
AT3G13600	8.3744	24.1813	2.88753	0.00528548		AT5G52900	12.4805	3.49446	0.279994	0.0247546
AT3G14185	0.751111	3.7488	4.99101	0.0371195		AT5G57240	70.7339	26.6106	0.376207	0.00380067
AT3G14810	0.102186	1.19599	11.7041	0.0122071		AT5G62170	4.4543	1.62765	0.365411	0.00147916
AT3G15670	2.85764	7.24965	2.53694	0.0028698		AT5G63160	18.0419	8.87674	0.492007	0.0143546
AT3G16175	2.19178	10.059	4.58943	0.0109928		AT5G66180	3.14253	9.93333e-09	3.16094e-09	0.00233328
AT3G16330	1.15076	2.90575	2.52506	0.0411622
AT3G19580	7.57047	15.3929	2.03328	0.0119849
AT3G21560	14.2756	139.87	9.79783	0.00130599
AT3G21760	3.80371	16.4937	4.3362	0.0035527
AT3G23530	20.626	163.448	7.92435	0.00097446
AT3G24190	5.15821	18.7553	3.63602	0.00405604
AT3G24520	3.97897	8.29314	2.08424	0.00198793
AT3G24840	8.76916	37.2019	4.24236	0.00286461
AT3G27690	45.0456	104.58	2.32164	0.00607213
AT3G46450	18.864	48.8471	2.58943	0.00073556
AT3G47430	1.56916	6.29754	4.01333	0.0036419
AT3G48240	0.819232	4.09547	4.99915	0.000938578
AT3G50970	6.60012	16.5277	2.50415	0.027756
AT3G51230	1.03484	2.66694	2.57715	0.0228657
AT3G51240	0.293035	51.9411	177.252	0.0065998
AT3G52370	19.1603	67.3872	3.51703	0.0021583
AT3G52540	1.53353	22.8582	14.9056	0.00583532
AT3G54890	391.539	1168.59	2.98461	0.000321757
AT3G57040	8.31701	18.3188	2.20258	0.0025874
AT3G57540	2.03193	8.26083	4.06551	0.00016463
AT3G57830	3.30751	10.8546	3.2818	0.00142198
AT3G62260	4.02069	8.42584	2.09562	0.0492198
AT4G02940	28.88	66.1817	2.29161	0.0101657
AT4G05050	773.258	1668.18	2.15734	0.00166521
AT4G09750	2.10628	15.5805	7.39713	2.98835e-05
AT4G11350	0.7776	2.24055	2.88136	0.00173559
AT4G11570	10.4405	43.0648	4.12479	0.000467045
AT4G11600	36.7631	99.9662	2.7192	0.0010785
AT4G12000	3.70114	16.9464	4.5787	0.000226549
AT4G13010	23.2909	54.3852	2.33503	0.000706806
AT4G15620	2.57833	8.16863	3.16818	0.000781808
AT4G17550	4.26964	10.3173	2.41642	0.0137602
AT4G18010	6.33738	15.6885	2.47555	0.000798751
AT4G21020	1.95503	4.51905	2.3115	0.0335713
AT4G23990	1.6685	10.4603	6.2693	0.00600041
AT4G26200	0.353952	1.28578	3.63262	0.00601141
AT4G27657	8.98641	63.4919	7.06532	0.000600362
AT4G28660	21.1951	47.2308	2.22838	0.00371562
AT4G33040	4.82226	13.1758	2.73229	0.00102678
AT4G33660	6.32454	16.5205	2.61212	0.00554883
AT4G35560	5.2278	22.5685	4.31702	0.000187911
AT4G35660	0.102634	4.78069	46.5802	0.0131452
AT4G37470	27.5075	145.345	5.28382	0.00316891
AT4G38060	19.1504	43.2145	2.25659	0.0350248
AT5G01520	13.3667	54.8936	4.10674	0.00129229
AT5G01540	0.0587403	1.10898	18.8794	0.0150378
AT5G02270	7.06739	289.609	40.9782	0.0234492
AT5G02280	53.9257	138.227	2.56329	5.2872e-05
AT5G02950	0.416296	1.3793	3.31326	0.000418876
AT5G06760	12.564	52.7057	4.19499	0.0448298
AT5G06980	22.0043	70.3587	3.19751	0.00144853
AT5G07990	1.92804	5.29482	2.74622	0.000835797
AT5G10150	1.19257	3.16046	2.65014	0.0428191
AT5G11260	38.5122	570.401	14.8109	0.00265451
AT5G15910	7.64259	16.8794	2.20859	0.0209307
AT5G15950	3.56372	143.5	40.2668	0.000542624
AT5G17230	50.0047	156.693	3.13357	0.000871883
AT5G17300	8.41689	40.695	4.83493	0.00116386
AT5G17460	1.59217	7.60527	4.77666	0.00137936
AT5G18670	45.2733	98.4051	2.17358	9.6067e-05
AT5G19970	3.78593	12.4014	3.27565	0.000905806
AT5G21280	16.027	39.7464	2.47996	0.000221386
AT5G22090	9.78142	44.2336	4.5222	1.40553e-05
AT5G24100	7.01111	16.1575	2.30456	0.00710092
AT5G24120	1.05075	150.771	143.489	0.00382538
AT5G24470	0.4729	6.44219	13.6227	5.64065e-06
AT5G24850	1.64974	30.9662	18.7704	0.000155316
AT5G24990	0.584646	1.49097	2.5502	0.0316232
AT5G37260	46.4791	134.689	2.89785	0.00606693
AT5G40390	11.6215	37.4516	3.22263	0.00411864
AT5G41050	3.90592	8.42321	2.15652	0.00138305
AT5G41400	50.7969	118.073	2.32442	0.000201382
AT5G44110	8.3872	552.69	65.8969	0.000385427
AT5G44190	11.2723	109.665	9.72871	0.00178483
AT5G51460	3.10158	8.74796	2.82049	0.00978163
AT5G52250	7.38705	114.799	15.5406	0.00235542
AT5G52420	2.47994	6.239	2.51579	0.0122083
AT5G52510	21.7092	58.8612	2.71135	0.00472838
AT5G52570	2.85115	19.6363	6.88715	0.00274868
AT5G53970	6.10052	30.8525	5.05735	0.000705584
AT5G54300	4.63026	9.93775	2.14626	0.00173801
AT5G54470	2.33522	15.904	6.81047	0.000135143
AT5G58140	20.5942	42.4621	2.06184	0.0174814
AT5G58650	160.959	335.026	2.08144	0.0134574
AT5G58750	6.56101	27.8205	4.24028	0.00661381
AT5G58760	2.81268	19.8361	7.05239	0.00239453
AT5G59050	4.60959	15.0125	3.2568	0.00216704
AT5G59220	1.72502	11.2899	6.54476	0.0109795
AT5G59820	5.97779	31.4904	5.26791	0.00907197
AT5G60850	13.1395	42.2685	3.21692	0.000243089
AT5G62220	4.43885	12.5566	2.8288	0.00652011
AT5G62490	0.727662	2.1482	2.95219	0.0159877
AT5G63130	1.10117	3.40901	3.09581	0.0491577
AT5G63380	16.2775	37.9017	2.32847	0.0100121
AT5G63450	10.6612	26.7105	2.50539	0.0070211
AT5G64780	6.57249	15.1945	2.31183	0.00419224
AT5G64840	21.5992	67.5778	3.12872	4.32627e-05
AT5G64850	31.6563	102.586	3.24063	0.000754593
AT5G64940	9.19622	31.1711	3.38955	0.00042216
AT5G65890	0.92028	2.40077	2.60874	0.00988513
AT5G66800	1.06211	2.41121	2.2702	0.0135297
AT5G67030	12.8226	50.6157	3.94737	0.000618162
AT5G67430	3.16576	6.58429	2.07985	0.00535263
